# Supplementary material for: Evolution of late-stage metastatic melanoma is dominated by aneuploidy and whole genome doubling
Source: PubMed Central journal article supplement (PMC7933255; doi:10.1038/s41467-021-21576-8), 2021-03-04
Supplement: 41467_2021_21576_MOESM1_ESM.pdf [file 41467_2021_21576_MOESM1_ESM.pdf]

## **Evolution of late-stage metastatic melanoma is dominated by aneuploidy and whole genome doubling**

Ismael A Vergara, Christopher P Mintoff, Shahneen Sandhu, Lachlan McIntosh, Richard J Young, Stephen Q Wong, Andrew Colebatch, Daniel L Cameron, Julia Lai Kwon, Rory Wolfe, Angela Peng, Jason Ellul, Xuelin Dou, Clare Fedele, Samantha Boyle, Gisela Mir Arnau, Jeanette Raleigh, Athena Hatzimihalis, Pacman Szeto, Jennifer Mooi, Daniel S Widmer, Phil F Cheng, Valerie Amann, Reinhard Dummer, Nicholas Hayward, James Wilmott, Richard A Scolyer, Raymond J Cho, David Bowtell, Heather Thorne, Kathryn Alsop, Stephen Cordner, Noel Woodford, Jodie Leditschke, Patricia O'Brien, Sarah-Jane Dawson, Grant A McArthur, Graham J Mann, Mitchell P Levesque, Anthony T Papenfuss<sup>\*,†</sup> and Mark Shackleton<sup>\*,†</sup>

\*Co-senior authors, contributed equally and are listed in alphabetical order.

†Co-corresponding authors: Anthony T Papenfuss ([papenfuss@wehi.edu.au](mailto:papenfuss@wehi.edu.au)) and Mark Shackleton ([mark.shackleton@monash.edu](mailto:mark.shackleton@monash.edu))

## **SUPPLEMENTARY INFORMATION**

## Table of contents

|                                                                                                                                          |    |
|------------------------------------------------------------------------------------------------------------------------------------------|----|
| Supplementary Figures .....                                                                                                              | 3  |
| Supplementary Notes .....                                                                                                                | 34 |
| <i>Experimental validation of somatic single nucleotide variants (SNVs) and small insertions/deletions (InDels)</i> .....                | 34 |
| <i>Comparison of SNV calling from DNA extracted from FFPE vs FF tumour material...</i>                                                   | 35 |
| <i>Comparison of CNV-based, SNV-based and joint phylogenetic inference</i> .....                                                         | 36 |
| <i>Comparison of MEDICC, SNV-based and joint-evidence phylogenies</i> .....                                                              | 38 |
| <i>Comparison with Sanborn et al phylogenies</i> .....                                                                                   | 39 |
| Supplementary Methods .....                                                                                                              | 41 |
| <i>Pre-autopsy tumor material</i> .....                                                                                                  | 41 |
| <i>Autopsy procedure</i> .....                                                                                                           | 41 |
| <i>Manual microdissection of patient tumour sections.</i> .....                                                                          | 41 |
| <i>Genomic DNA Extraction</i> .....                                                                                                      | 41 |
| <i>DNA Quantitation</i> .....                                                                                                            | 42 |
| <i>Whole Exome Sequencing</i> .....                                                                                                      | 43 |
| <i>Whole Genome Sequencing</i> .....                                                                                                     | 43 |
| <i>Targeted Amplicon sequencing validation</i> .....                                                                                     | 43 |
| <i>Somatic Single Nucleotide Variant and small Insertion/Deletion detection</i> .....                                                    | 44 |
| <i>Mutational signatures, melanoma and cancer-associated genes, chromosomal instability and genomic integrity-associated genes</i> ..... | 45 |
| <i>Neoantigen prediction and predicted expression in TCGA cohort</i> .....                                                               | 46 |
| <i>Characterisation of variants deleted due to loss of heterozygosity</i> .....                                                          | 47 |
| <i>Somatic copy number alterations detection and CNV-based phylogeny</i> .....                                                           | 49 |
| <i>Structural variant detection</i> .....                                                                                                | 49 |
| <i>Fluorescence In-Situ Hybridisation</i> .....                                                                                          | 50 |
| Supplementary References .....                                                                                                           | 51 |
| Supplementary Tables .....                                                                                                               | 54 |

# Supplementary Figures

**FIGURE S1**

-  Primary
-  Regional Metastasis
-  Distant Metastasis (Pre-mortem)
-  Distant Metastasis (Post-mortem)

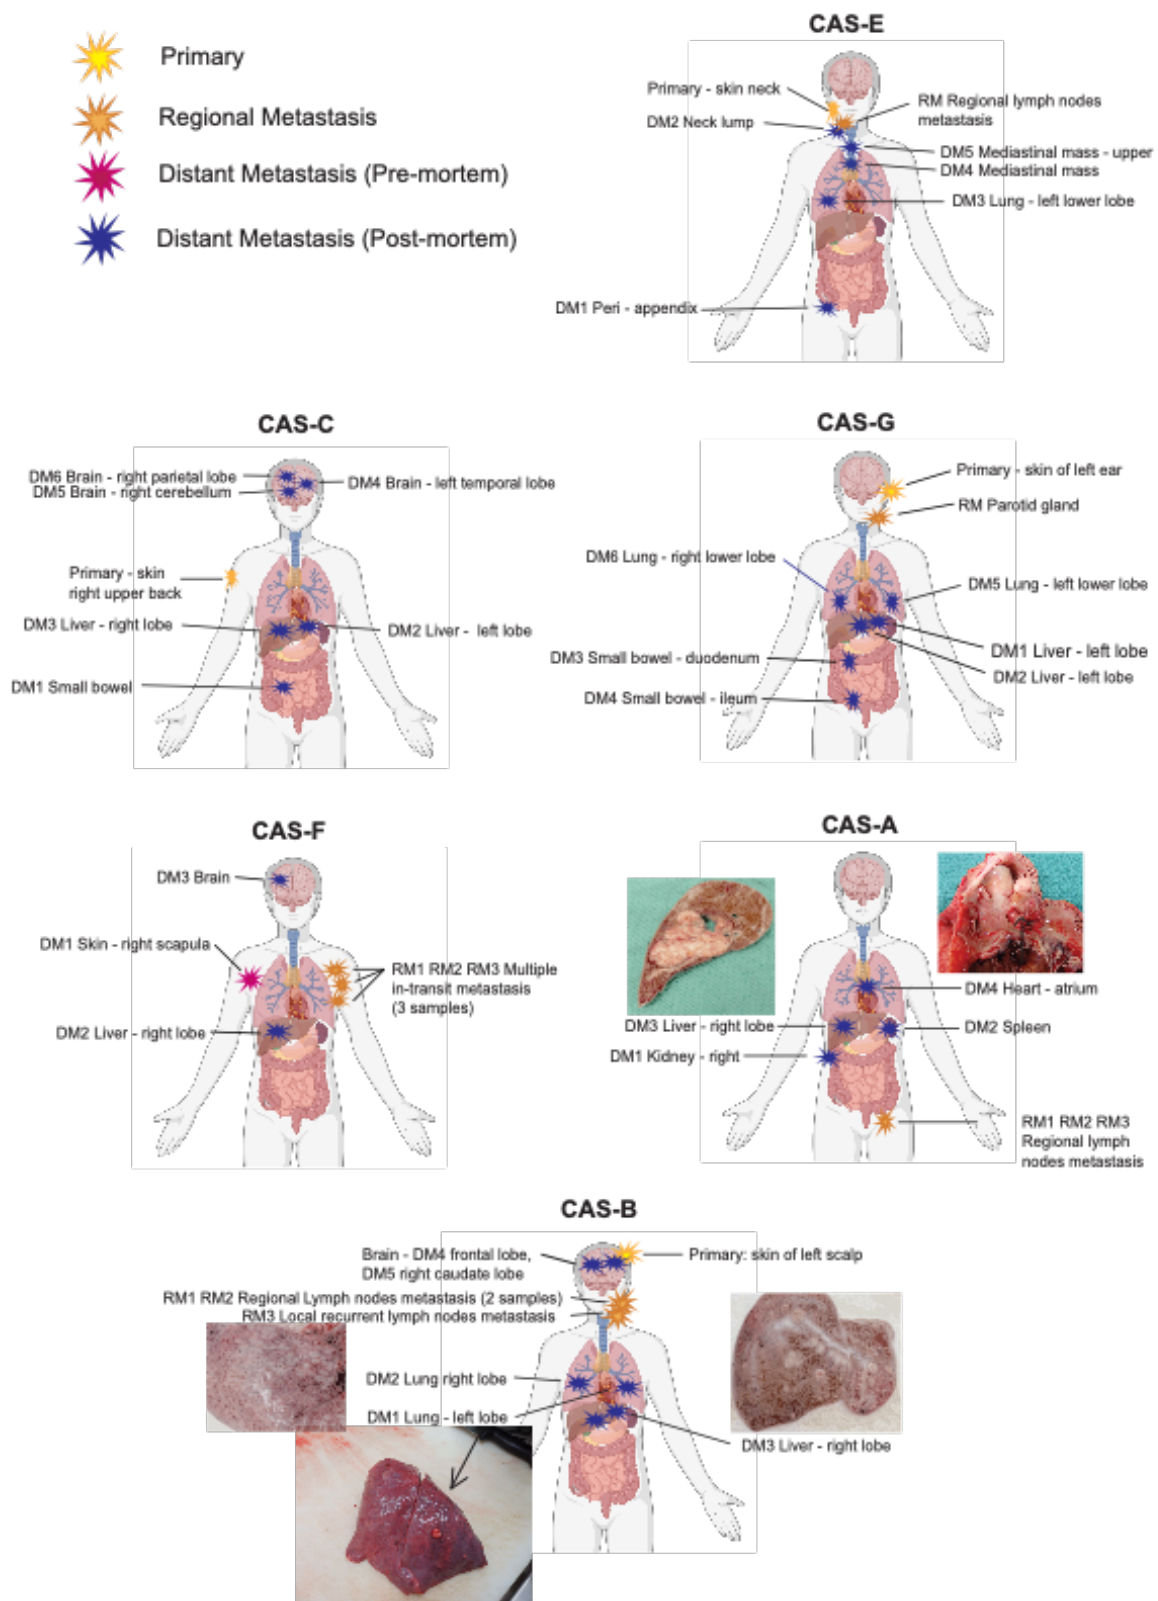

**Supplementary Figure 1. Spatial distribution of pre-mortem and autopsy samples for six CASCADE patients.** CASCADE patient CAS-D is shown in Figure 1A. The individual figures were created with BioRender.com. See Table S1 for sample details of samples.



**FIGURE S2****(A)**

| Case  | Mutation   | Primary Site | Histo Subtype | TNM      | Breslow | Mit Count | Ulceration |
|-------|------------|--------------|---------------|----------|---------|-----------|------------|
| CAS-D | BRAF V600E | Back         | NM            | T4N3M1   | 4.7     | 2         | NO         |
| CAS-G | BRAF V600E | Ear          | SSM           | T4bN2cM0 | 7       | 5         | YES        |
| CAS-C | BRAF K601E | Back         | SSM           | T2aN0M0  | 1.9     | <1        | NO         |
| CAS-E | BRAF V600E | Neck         | NM            | T4NxM1b  | 7.6     | 20        | NO         |
| CAS-A | BRAF V600E | Thigh        | SSM           | T1bN0M0  | 1       | 1         | YES        |
| CAS-F | BRAF V600E | Neck         | NM            | T4N3M0   | 15      | 15        | YES        |
| CAS-B | BRAF V600E | Scalp        | Not reported  | T2aN0M0  | 1.35    | 10        | NO         |

**(B)**

| Case  | Mutation         | Primary Site | Histo Subtype     | TNM      | Breslow | Mit Count | Ulceration |
|-------|------------------|--------------|-------------------|----------|---------|-----------|------------|
| MI-F  | BRAF/NRAS/NF1 WT | Ear          | NM                | T4aN3M0  | 12      | 19        | NO         |
| SK-G  | NRAS Q61K        | Forearm      | NA                | NA       | 12      | 11        | NO         |
| SK-H  | BRAF/NRAS/NF1 WT | Leg          | NA                | NA       | 35      | 4         | YES        |
| ETH-E | BRAF V600E       | Spine        | Melanoma Ex-Naevo | T3N1aM0  | 3.8     | NA        | NO         |
| ETH-F | BRAF/NRAS/NF1 WT | Scapula      | SSM               | T4bN3M0  | 17      | >1        | YES        |
| ETH-J | NRAS Q61R        | Scapula      | NM                | T4bN1bM0 | 5       | NA        | YES        |

**Supplementary Figure 2. Clinical data for (A) CASCADE and (B) external cohorts patients.** External cohorts correspond to those reported by Raaijmakers *et al*<sup>1</sup> and Sanborn *et al*<sup>2</sup>. See Tables S1 and S2 for sample details.

FIGURE S3

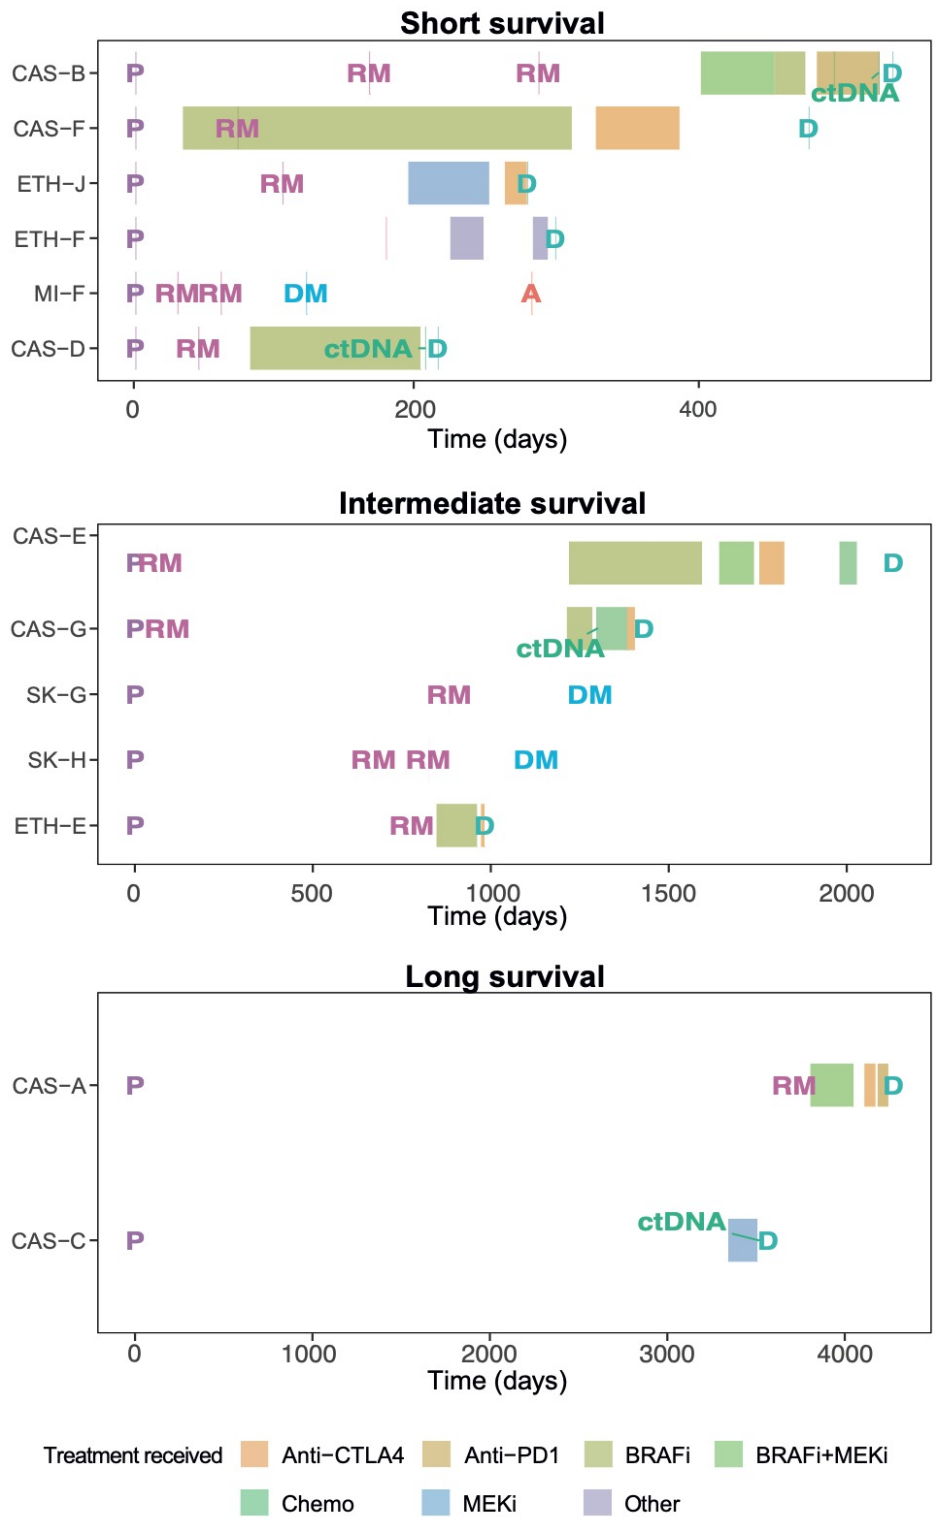

**Supplementary Figure 3. Timeline of disease progression and treatment across 13 patients in the cohort, whose survival after initial diagnosis of primary melanoma was either short, intermediate or long.** Treatments received are colour coded. P: Primary Tumour RM: Regional Metastasis. DM: Distant Metastasis. ctDNA: circulating tumour DNA from plasma sample. A: Alive. D: Deceased. Status at last follow up not available for patients SK-G and SK-H.

FIGURE S4

| CAS-G DM6-FFPE |                   |               |                |                   |            |
|----------------|-------------------|---------------|----------------|-------------------|------------|
|                | Ubiquitous (FFPE) | Shared (FFPE) | Private (FFPE) | Not Called (FFPE) |            |
| CAS-G DM6-FF   | Ubiquitous (FF)   | 601           | 0              | 0                 | 7          |
|                | Shared (FF)       | 0             | 96             | 20                | 18         |
|                | Private (FF)      | 0             | 7              | 1303              | <b>569</b> |
|                | Not Called (FF)   | 4             | 37             | <b>987</b>        | 0          |

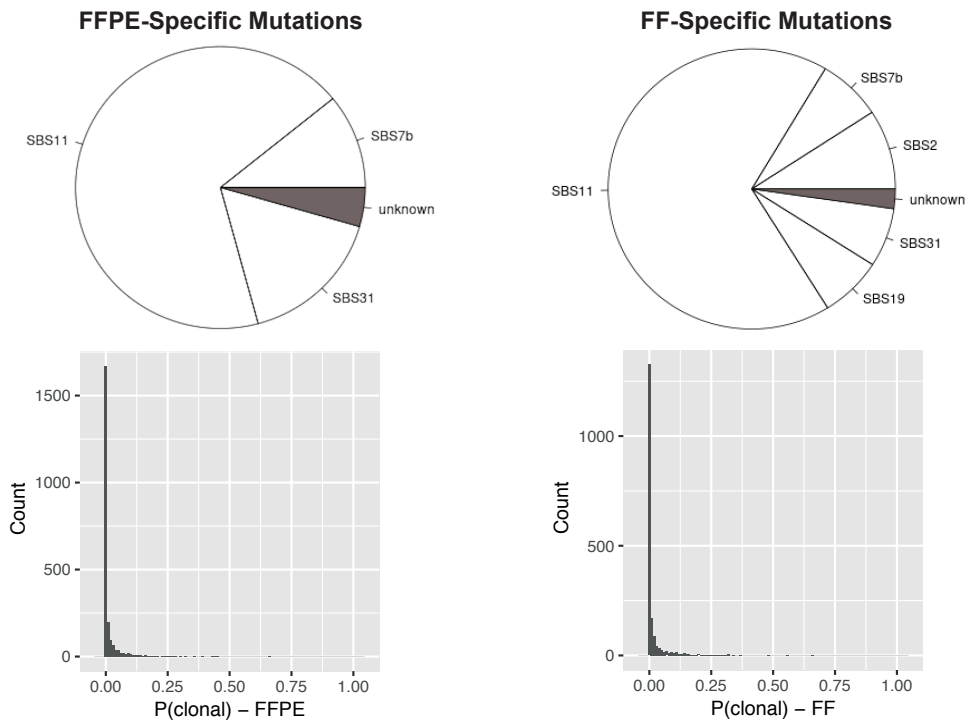

**Supplementary Figure 4. Comparison of single nucleotide variant (SNV) and small insertions/deletions (indels) calling by analysis of ubiquitous, shared and private mutations in a matched fresh frozen (FF) tissues sample and its adjacent formalin-fixed paraffin embedded (FFPE) counterpart from the same metastasis (DM6-lung) from patient CAS-G.** Contingency table analysis (upper) of distribution of SNV and small indel calls from FF vs FFPE samples. Mutational signatures associated with private mutations specific to each sample (middle pie charts) were assessed with deconstructSigs<sup>3</sup> using the COSMIC set of signatures. The probability of clonality of private mutations in each sample (bottom panels) was calculated as reported<sup>4</sup>.

FIGURE S5

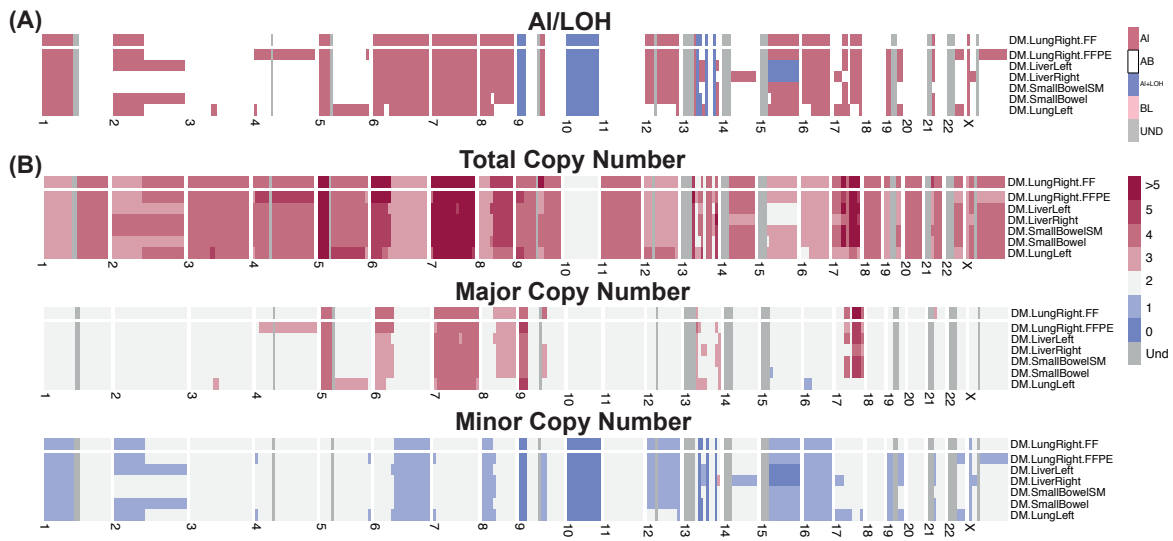

**Supplementary Figure 5. Comparison of cytogenetic band-level allelic state calling (A) and total, major and minor copy number (CN) profile calling (B) in a matched fresh frozen (FF) tissues sample and its adjacent formalin-fixed paraffin embedded (FFPE) counterpart from the same metastasis (DM6-lung) from patient CAS-G.** Regions of allelic balance (AB) have the same paternal and maternal allelic CN. Regions of allelic imbalance (AI) have different allelic CN. Undetermined (UND) regions are indicated in grey. The calculated CN is indicated in legend to right; regions with total CN >5 share the same colour. LOH: loss of heterozygosity, BL: biallelic loss. DM: distant metastasis.

**FIGURE S6**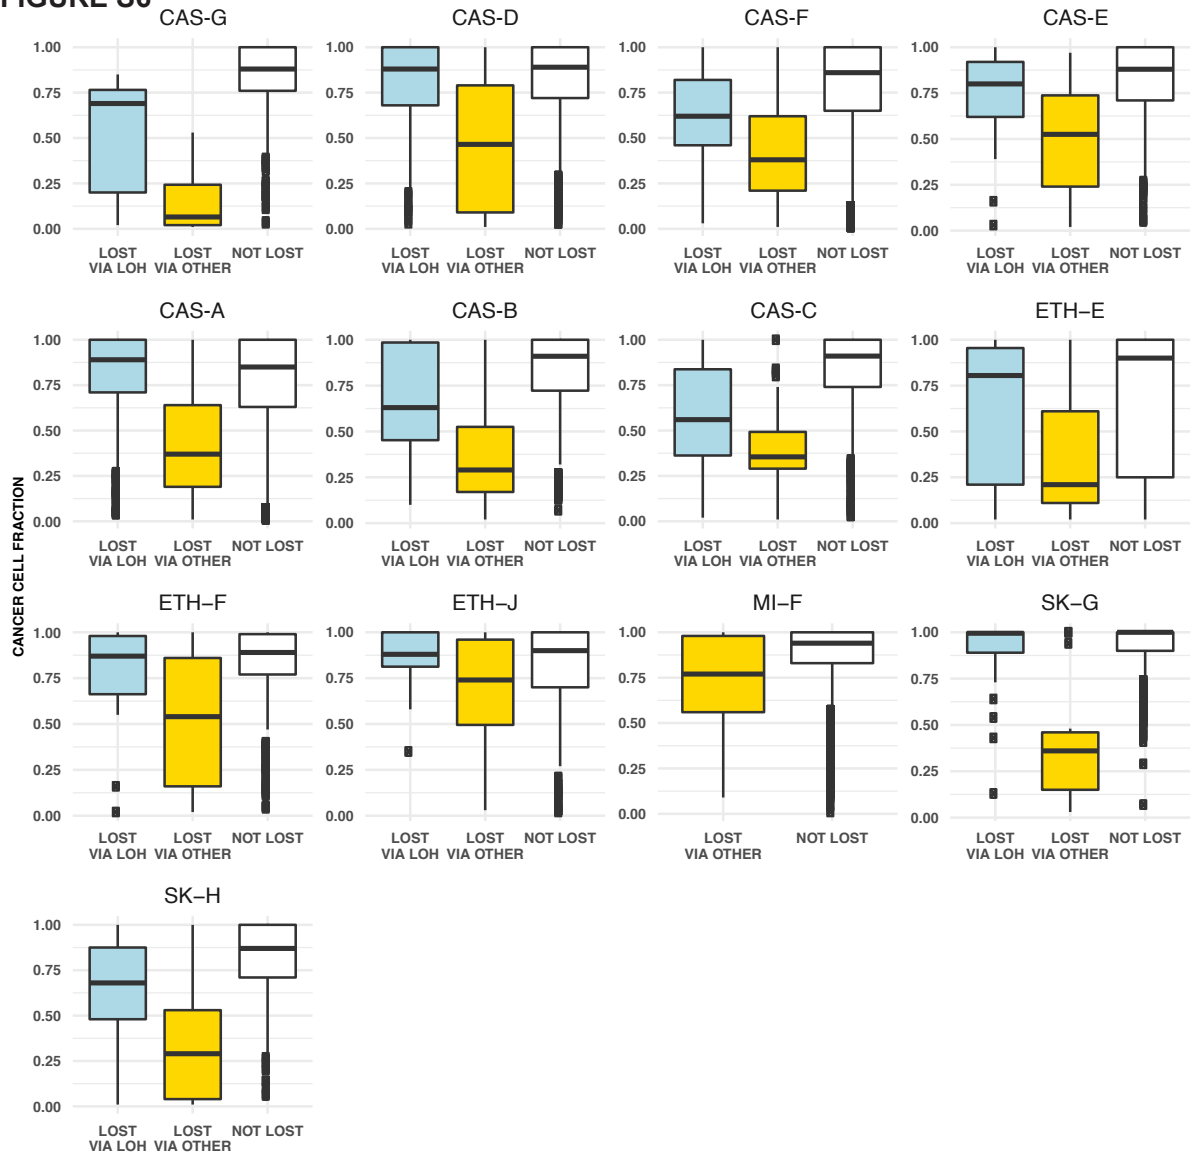

**Supplementary Figure 6. Distribution of the cancer cell fractions (CCF) in the early stage disease of each patient.** The box (hinges) shows the first and third quartiles ( $Q_1$  and  $Q_3$  respectively). The whiskers extend from the hinges  $\pm 1.5(Q_3 - Q_1)$ . Outliers are drawn as square dots. The three groups are:

*Not Lost*: mutations not lost in any late stage lesion. *Lost via LOH*: mutations lost in at least one late stage lesion, co-occurring with the acquisition of an LOH event. *Lost via Other*: mutations lost in at least one late stage lesion, with no LOH acquisition. CCF was defined for each somatic mutation as the fraction of tumour cells in the sample that carry the mutation and estimated as described in Supplementary Methods.

FIGURE S7

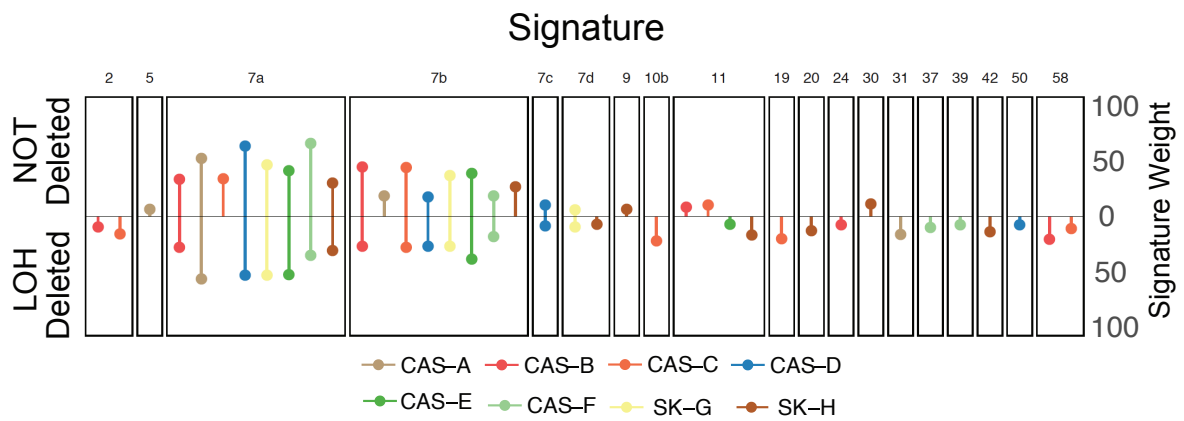

**Supplementary Figure 7. Mutational signature distribution of *Lost via LOH* mutations in the early stage disease of each patient. *Not Lost*: mutations not lost in any late stage lesion. *Lost via LOH*: mutations lost in at least one late stage lesion, co-occurring with the acquisition of an LOH event. Patients CAS-G, ETH-E, ETH-F, ETH-J and MI-F were excluded due to low number of mutations in the *Lost via LOH* group.**



FIGURE S8

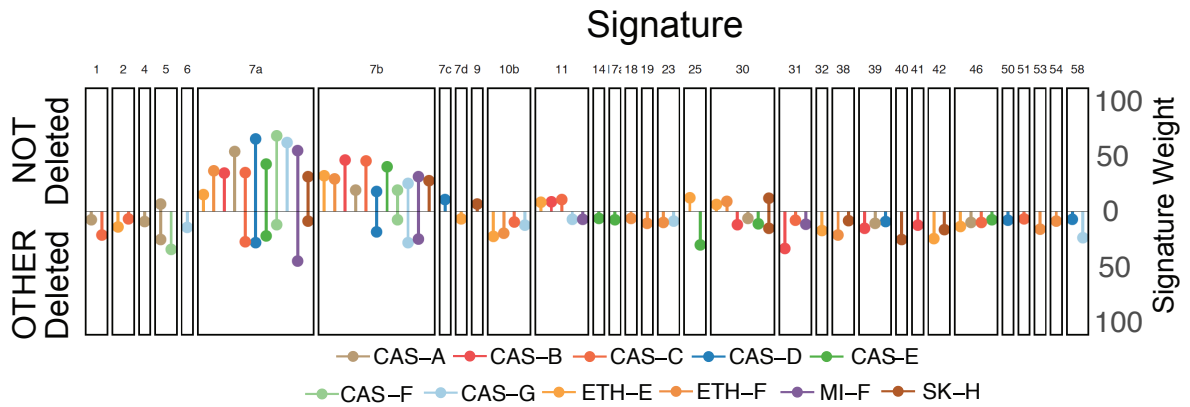

**Supplementary Figure 8. Mutational signature distribution of *Lost via Other* mutations in the early stage disease of each patient. *Not Lost*: mutations not lost in any late stage lesion. *Lost via Other*: mutations lost in at least one late stage lesion that can't be explained due to LOH. Patients SK-G and ETH-J were excluded due to low number of mutations in the *Lost via Other* group.**

**FIGURE S9**

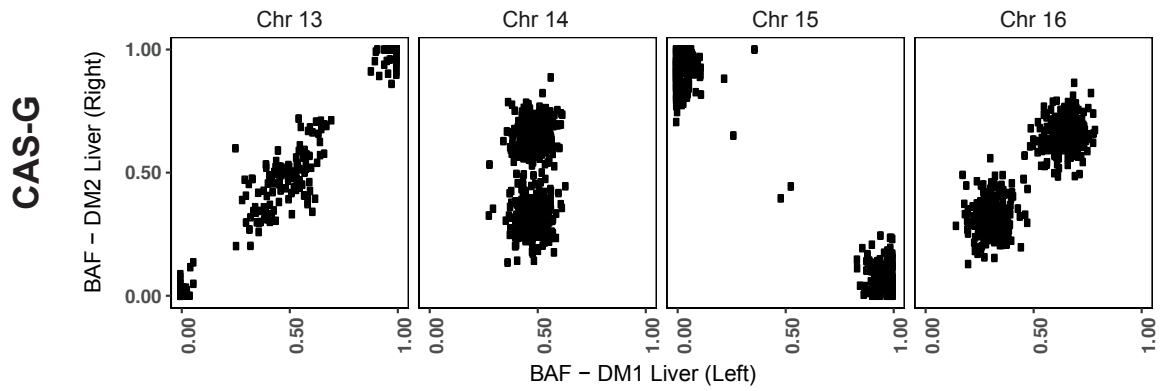

**Supplementary Figure 9. B-allele frequencies of single nucleotide polymorphisms in two distant liver metastases in patient CAS-G. A mirrored imbalance of heterozygous SNPs on chromosome 15 was evident between these lesions.**

FIGURE S10

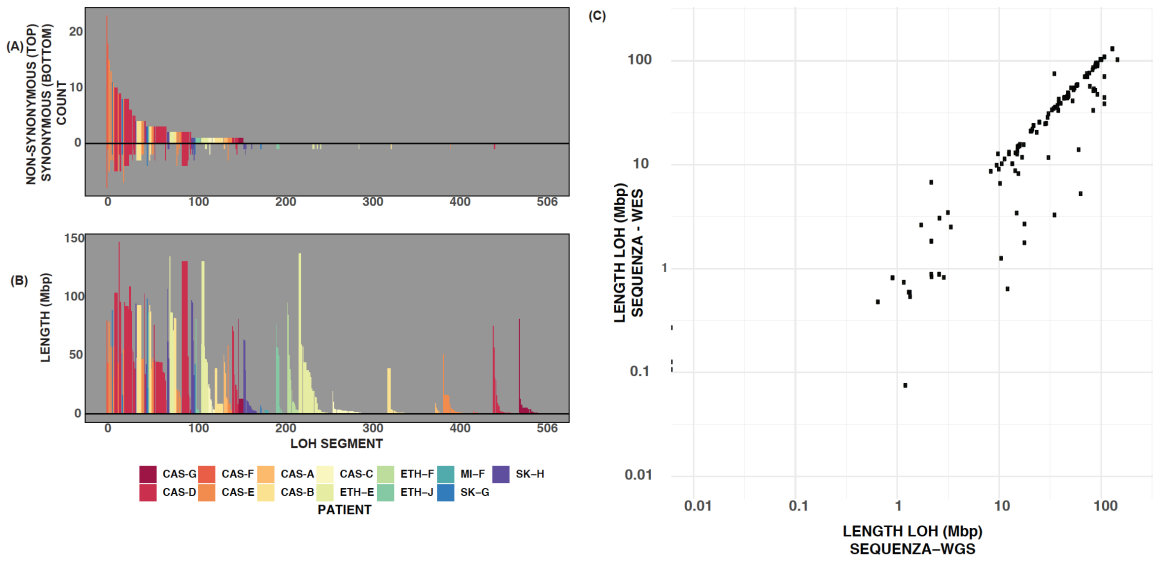

**Supplementary Figure 10. Deletion of non-synonymous in late-stage melanoma by loss of heterozygosity.** (A) Number of non-synonymous and synonymous variants lost due to each LOH segment. Color denotes patient. (B) Length of each LOH segment. (C) Lengths of corresponding LOH segments in WES and WGS data from patient CAS-D.

**FIGURE S11**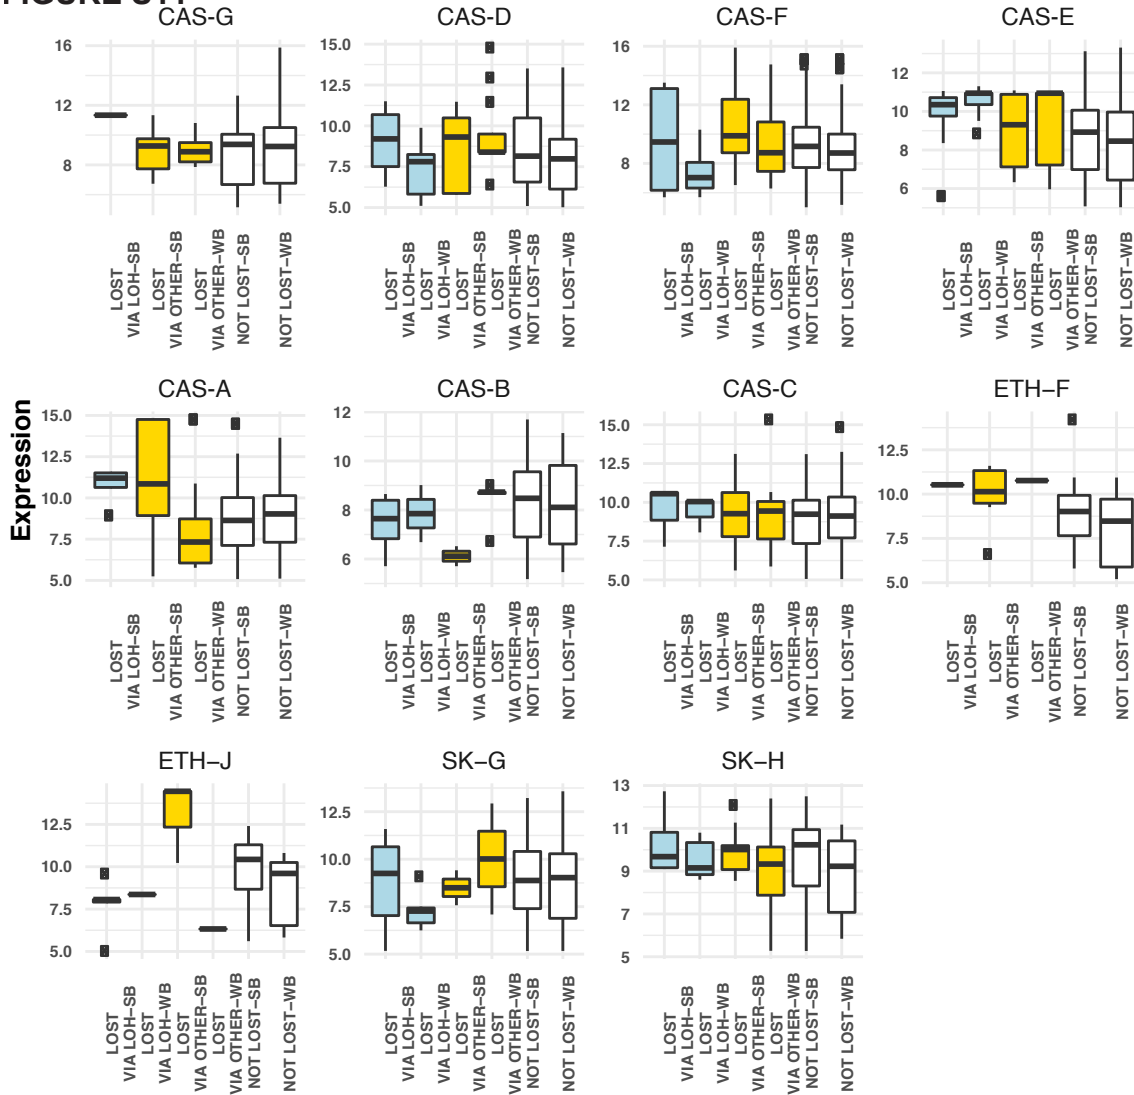

**Supplementary Figure 11. Distribution of gene expression based on TCGA SKCM cohort (see Supplementary Methods) for predicted neoantigen mutations.** The box (hinges) shows the first and third quartiles ( $Q_1$  and  $Q_3$  respectively). The whiskers extend from the hinges  $\pm 1.5(Q_3 - Q_1)$ . Outliers are drawn as square dots. Groups are further separated into mutations with estimated strong binding affinity (SB) and weak binding affinity (WB).

**FIGURE S12**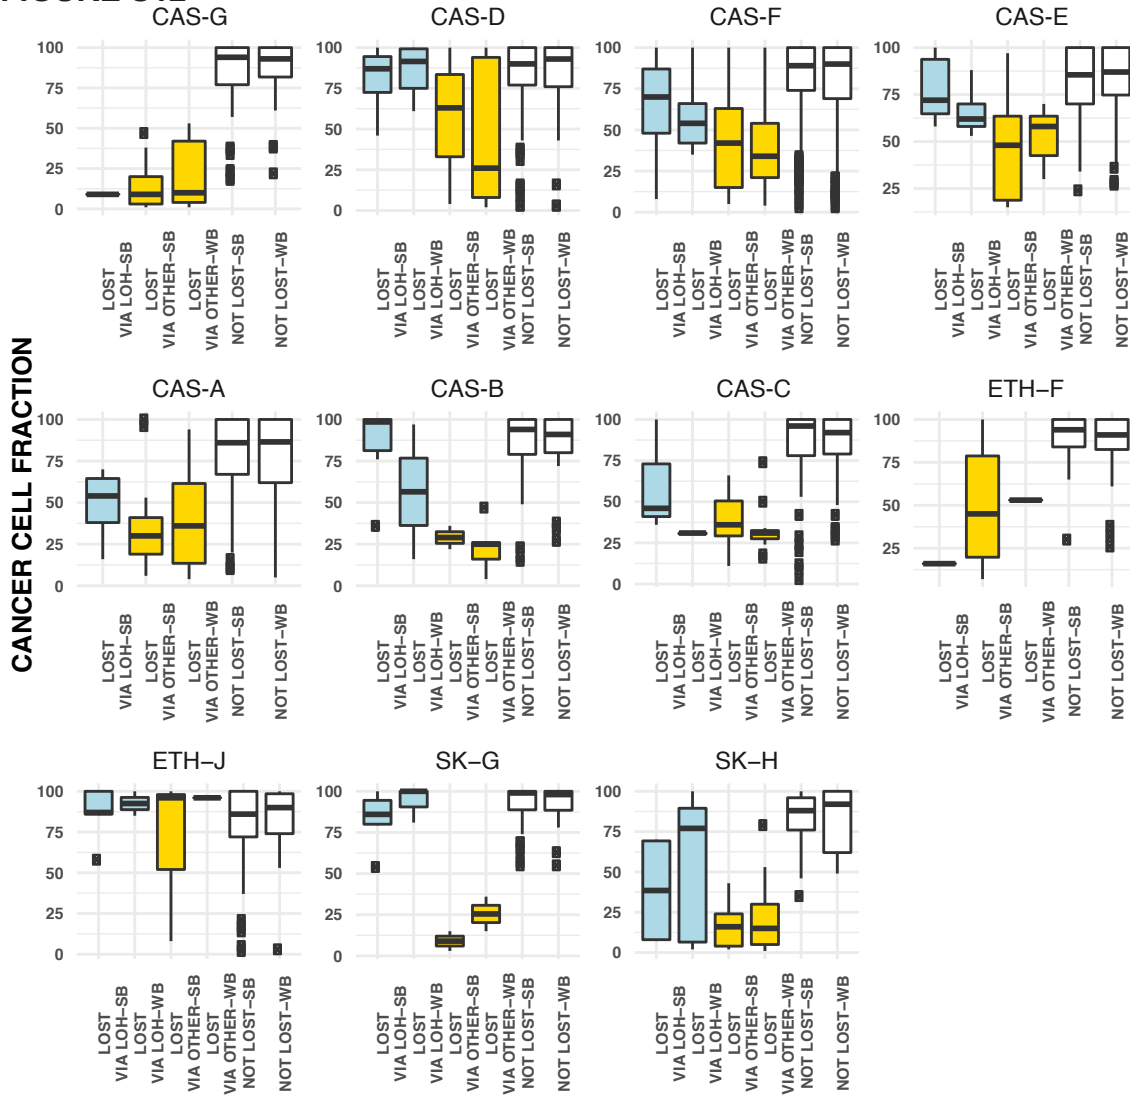

**Supplementary Figure 12. Distribution of neoantigen cancer cell fractions.** The box (hinges) shows the first and third quartiles ( $Q_1$  and  $Q_3$  respectively). The whiskers extend from the hinges  $\pm 1.5(Q_3 - Q_1)$ . Outliers are drawn as square dots. Groups are further separated into mutations with estimated strong binding affinity (SB) and weak binding affinity (WB).

FIGURE S13

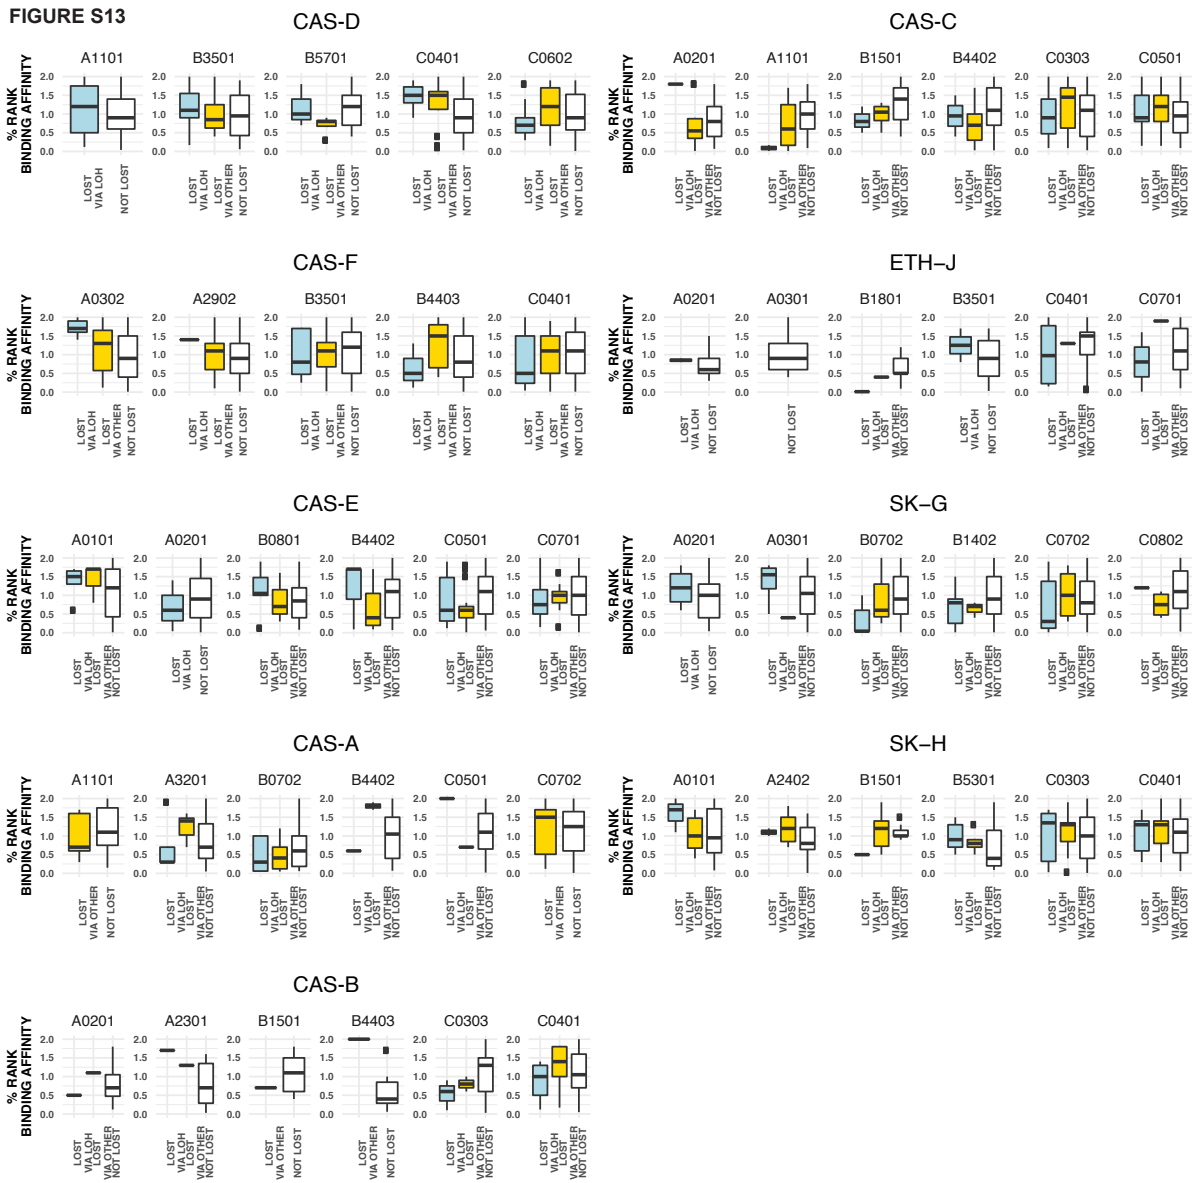

**Supplementary Figure 13. Binding affinity rank distribution among groups of neoantigenic mutations.** Each plot represents the distribution for each HLA-allele in a given patient. A lower %Rank Binding Affinity indicates increased binding affinity. The box (hinges) shows the first and third quartiles ( $Q_1$  and  $Q_3$  respectively). The whiskers extend from the hinges  $\pm 1.5 (Q_3 - Q_1)$ . Outliers are drawn as square dots.

**FIGURE S14**

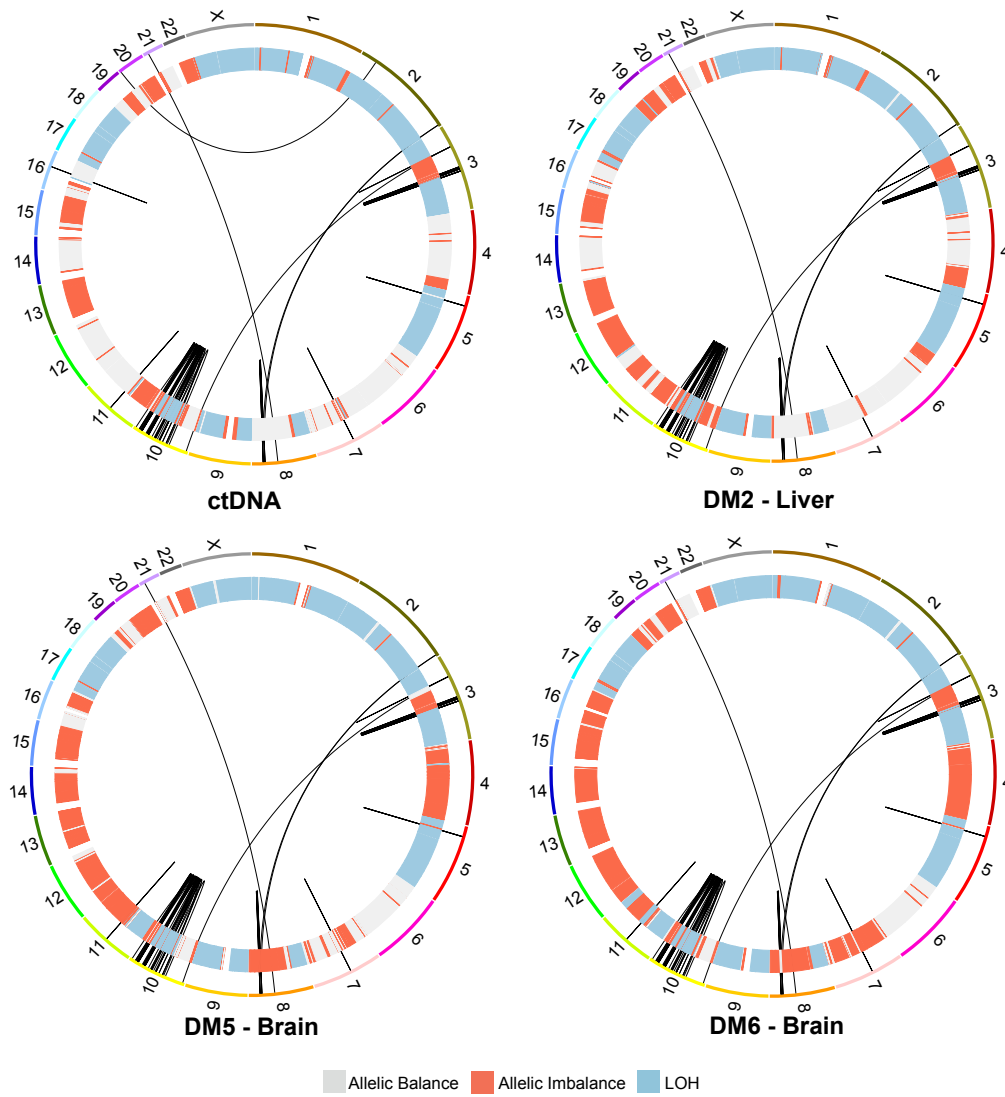

**Supplementary Figure 14. Circos plots of structural variants (SVs) detected in distant metastases and plasma ctDNA for patient CAS-D. Inner track indicates the allelic state for each chromosome.**

FIGURE S15

CAS-D

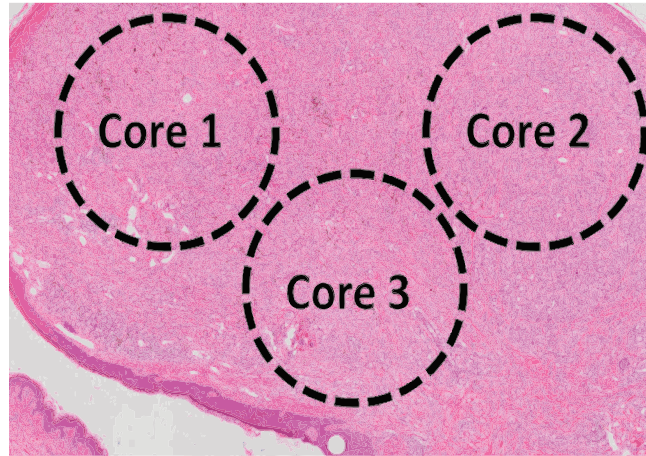

Primary Tumour

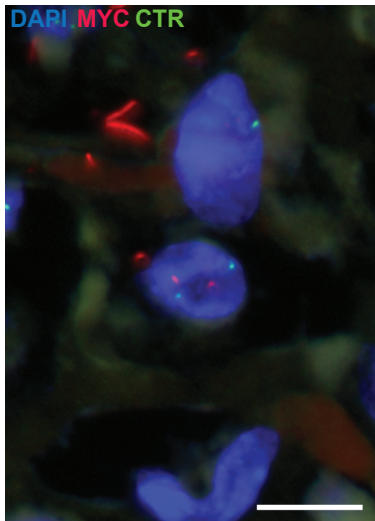

Core 1

MYC Average Count: 2.3  
MYC Prediction: 2  
CTR Average Count: 1.36  
CTR Prediction: 2

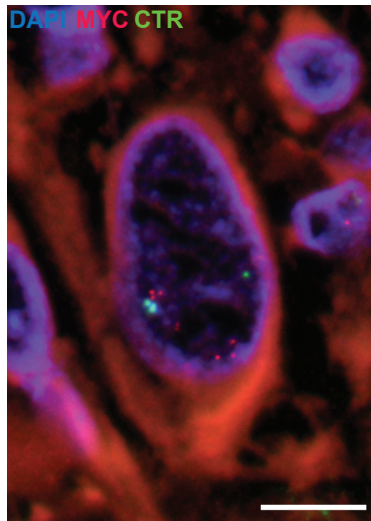

Core 2

MYC Average Count: 3.92  
MYC Prediction: 4  
CTR Average Count: 2.86  
CTR Prediction: 3

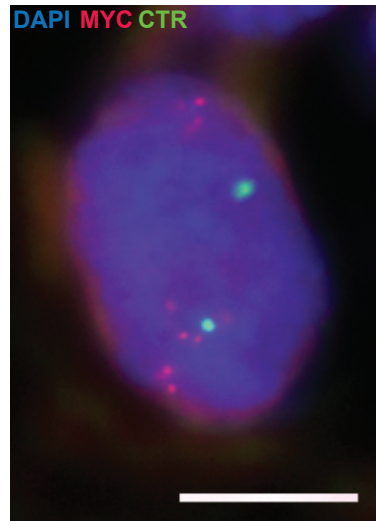

Distant Metastasis Central Liver

MYC Average Count: 6.71  
MYC Prediction: 7  
CTR Average Count: 2.81  
CTR Prediction: 4



**Supplementary Figure 15. Comparison of methods of copy number (CN) estimation in two primary melanoma cores and a liver metastasis from patient CAS-D.** Average FISH counts and predicted CNs for *MYC* and centromere (CTR; chromosome 8) are provided. Counts for each primary core were calculated over 50 randomly chosen cells. Counts for the liver metastasis (DM3) were calculated over 100 cells. Scale bar = 10um.

FIGURE S16

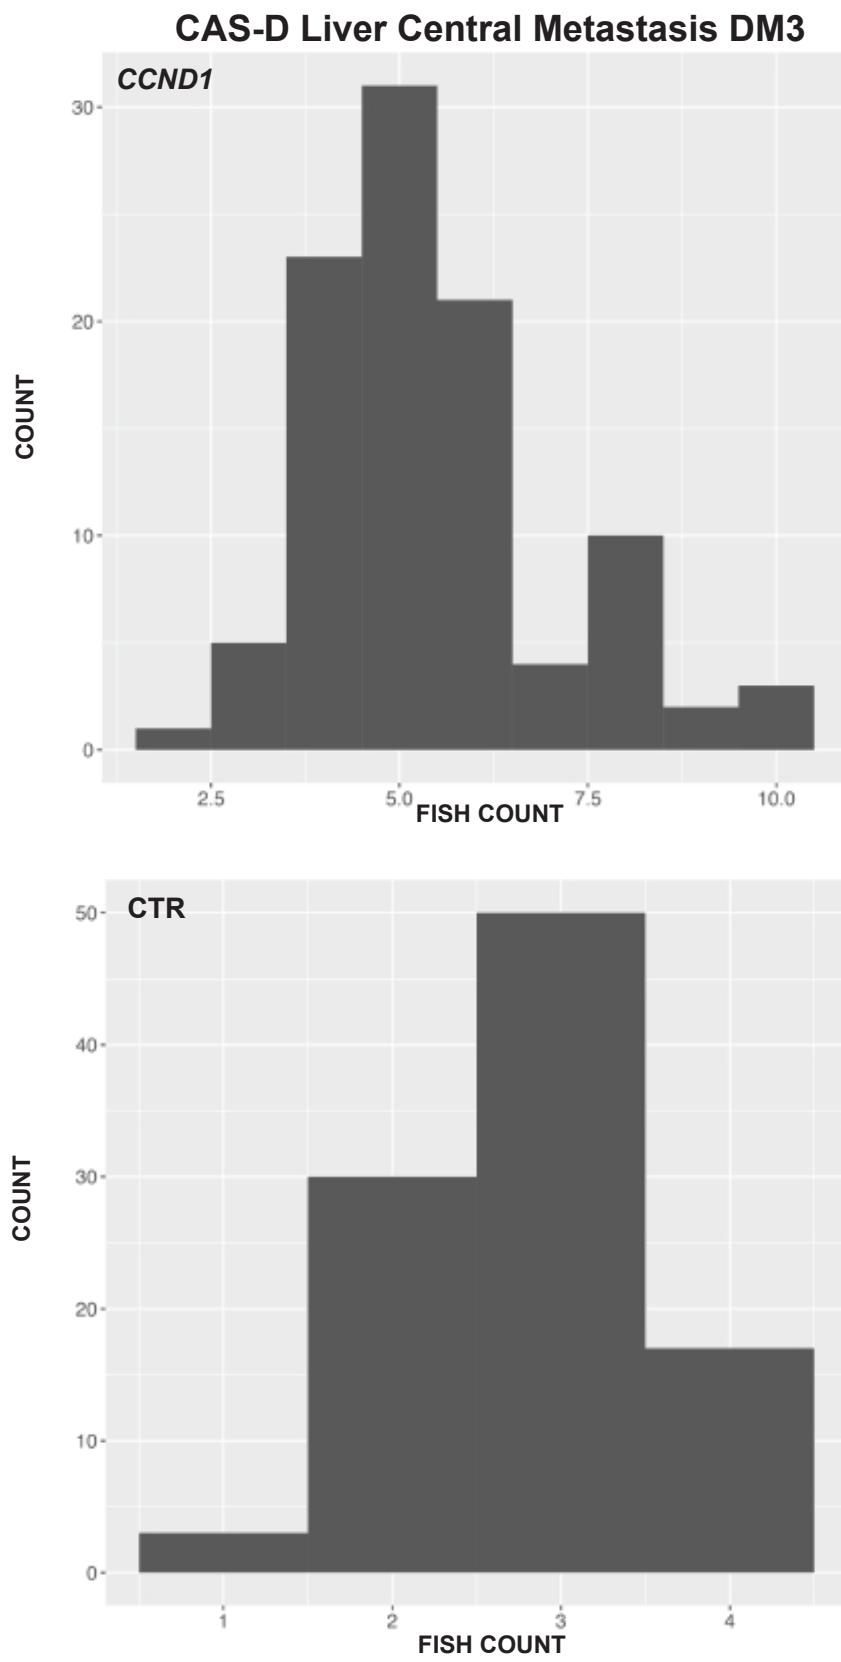

**Supplementary Figure 16. Distribution of counts of FISH probes against *CCND1* (top) and the chromosome 11 centromere (CTR, bottom) in a liver metastasis of patient CAS-D.** Y axis indicates number of cells (of a total of 100) with the indicated number of copies of these probes.

FIGURE S17

# CAS-C

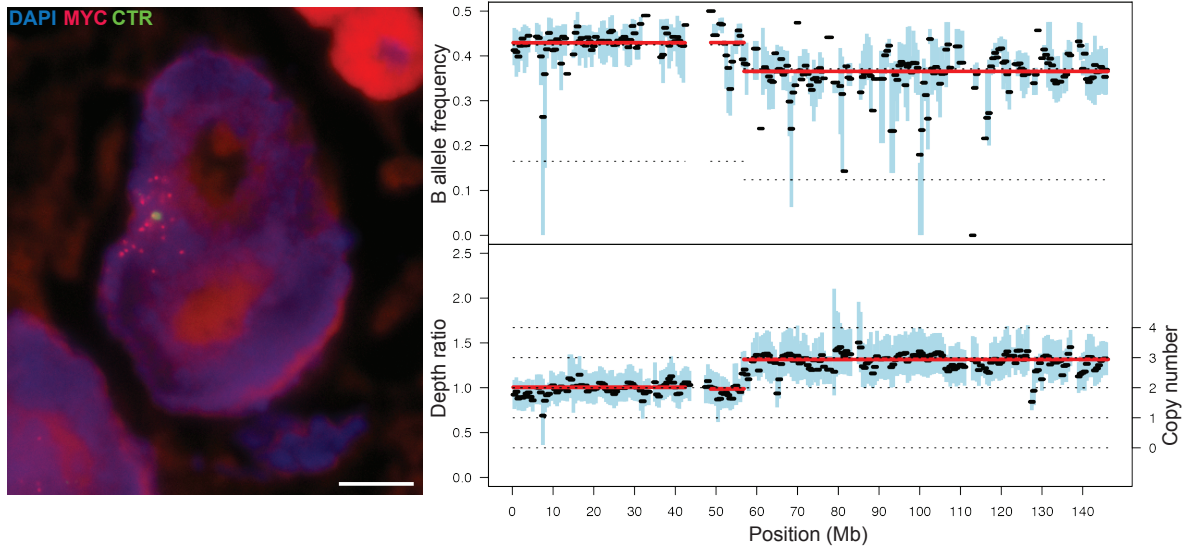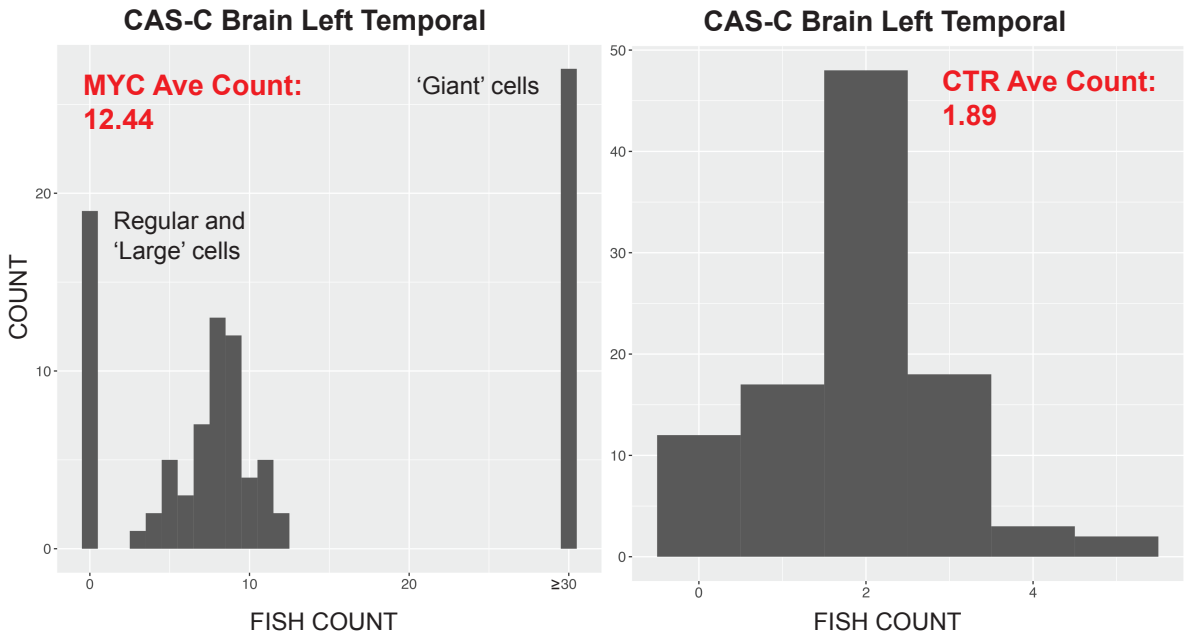

**Supplementary Figure 17. Subclonality, *MYC* amplification and giant cells in a brain metastasis (DM4) from patient CAS-C. Upper left:** Identification by FISH in a giant cell of *MYC* amplification using probes for *MYC* and the chromosome 8 centromere (CTR). **Upper right:** B-allele frequencies and depth ratio for chromosome 8 as generated by Sequenza. **Lower:** Distributions show the number of cells (of a total of 100) with the indicated number of copies of probes for *MYC* (left) and the chromosome 8 centromere (CTR, right). Scale bar = 10um.



FIGURE S19

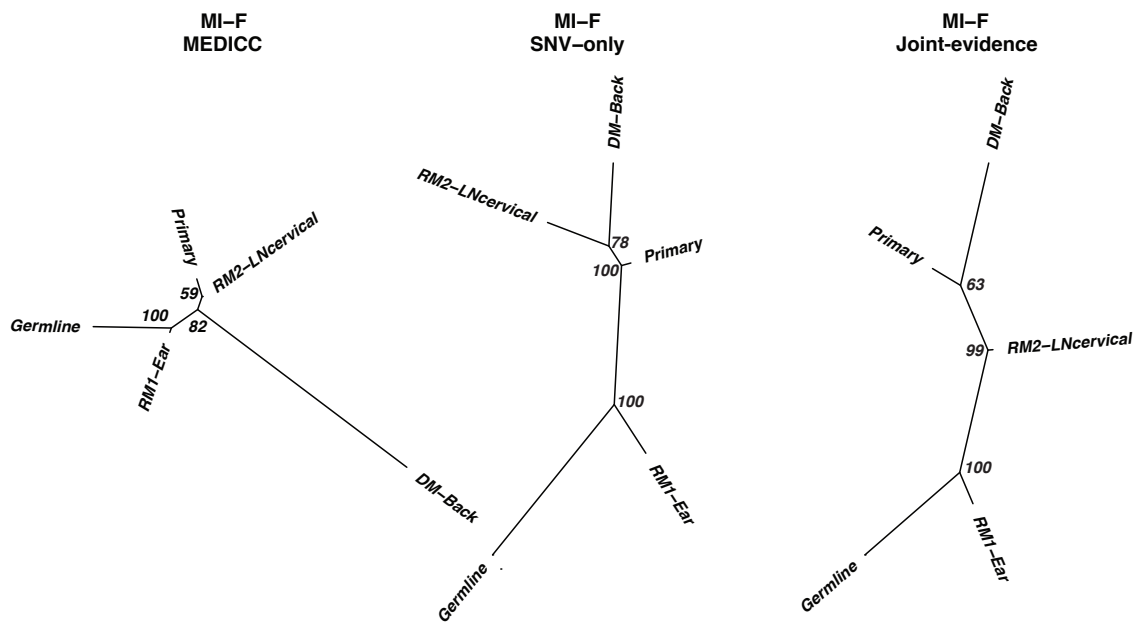

**Supplementary Figure 19. MEDICC, SNV-only and joint-evidence phylogenies for patient MI-F. Germline branch length for the SNV-only and equally-weighted trees was truncated to 100 for better representation.**

FIGURE S20

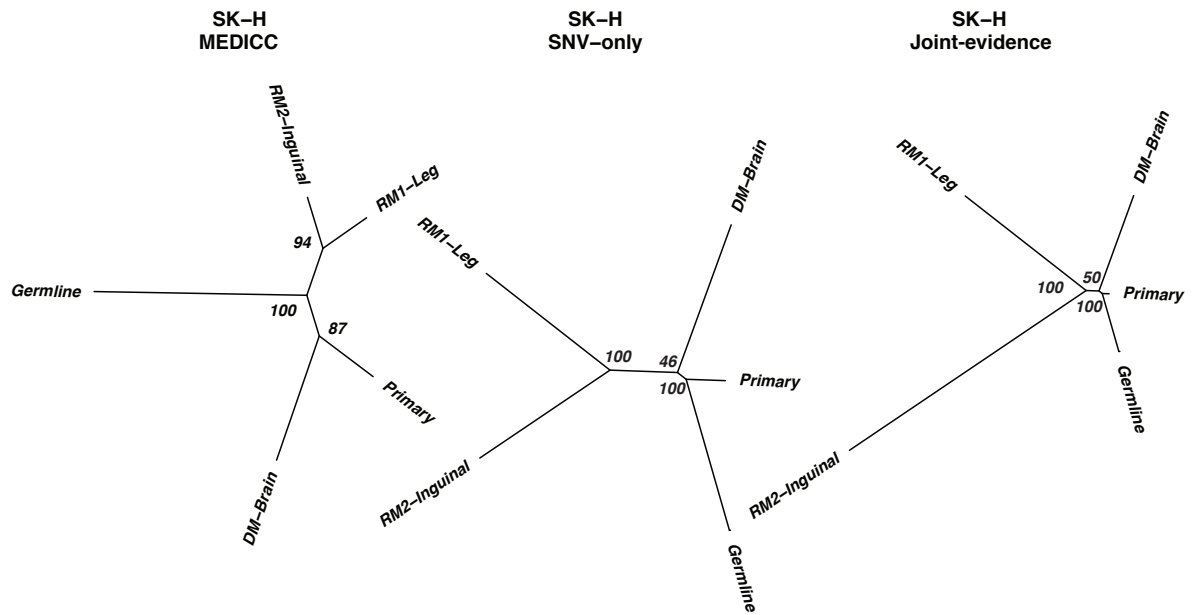

**Supplementary Figure 20. MEDICC, SNV-only and joint-evidence phylogenies for patient SK-H.** Germline branch length for the SNV-only tree was truncated to 100 for better representation.



FIGURE S21

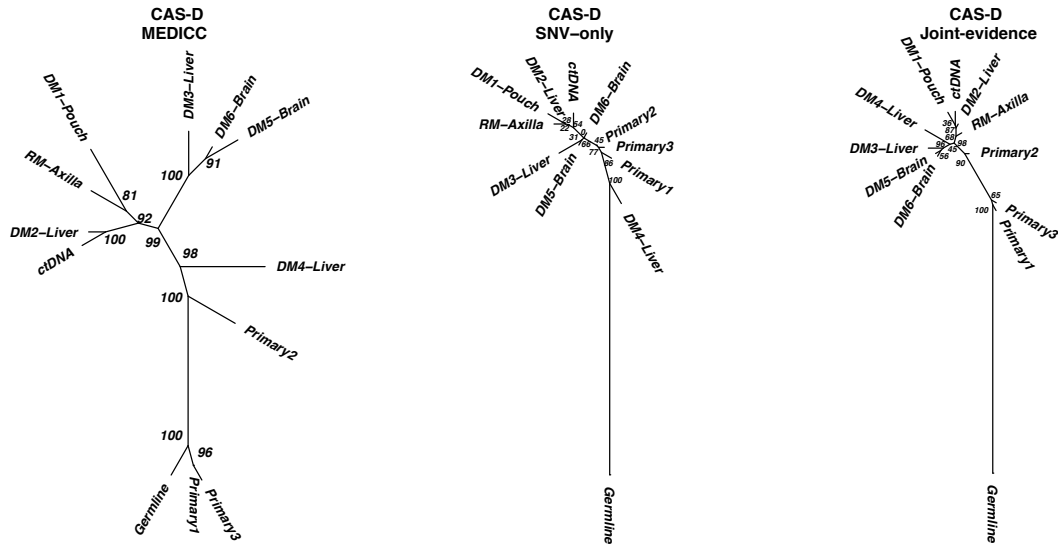

Supplementary Figure 21. MEDICC, SNV-only and joint-evidence phylogenies for patient CAS-D. Germline branch length for the SNV-only tree was truncated to 100 for better representation.

FIGURE S22

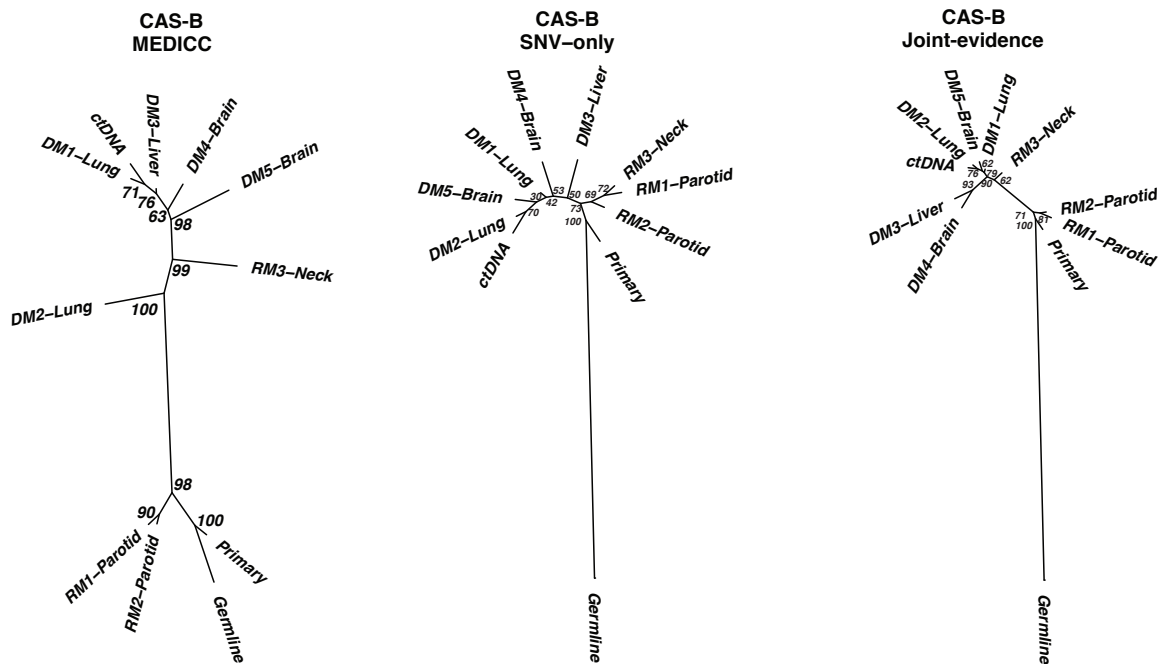

Supplementary Figure 22. MEDICC, SNV-only and joint-evidence phylogenies for patient CAS-B. Germline branch length for the SNV-only tree was truncated to 100 for better representation.

FIGURE S23

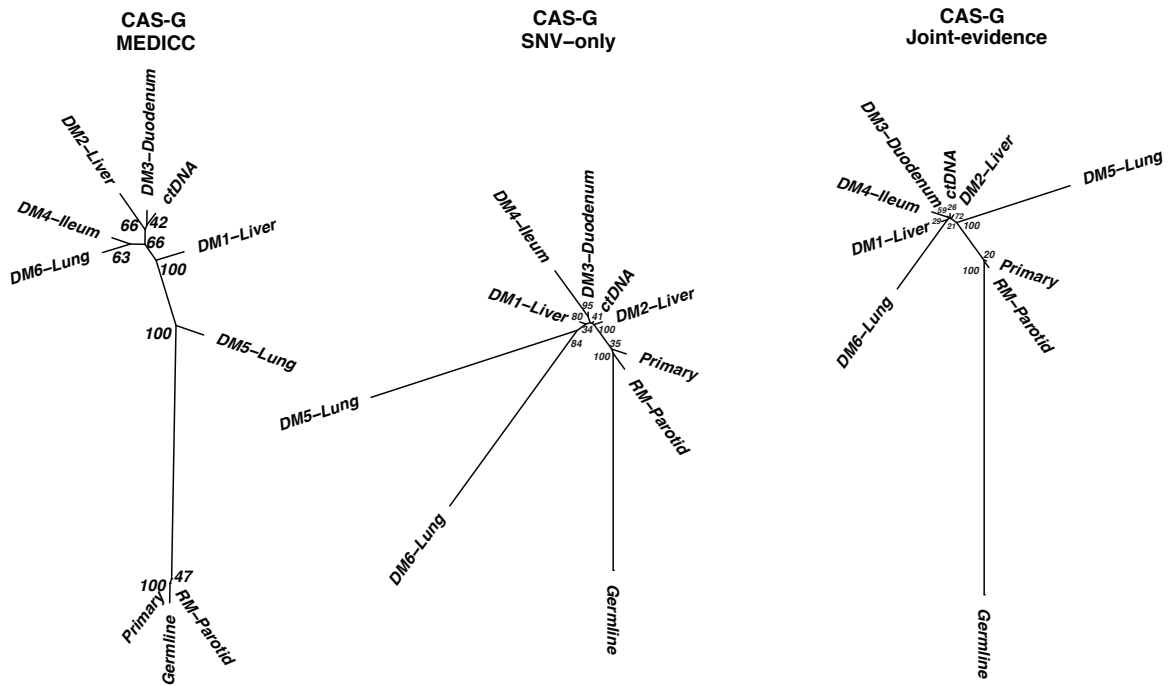

Supplementary Figure 23. MEDICC, SNV-only and joint-evidence phylogenies for patient CAS-G. Germline branch length for the SNV-only tree was truncated to 100 for better representation.

FIGURE S24

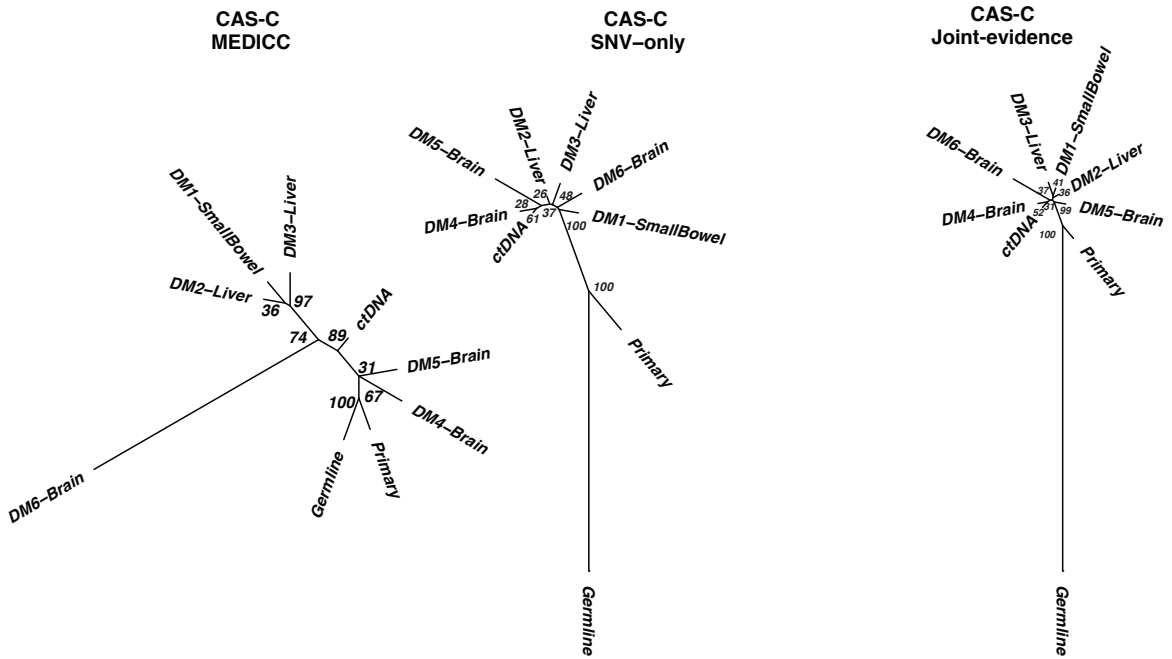

Supplementary Figure 24. MEDICC, SNV-only and joint-evidence phylogenies for patient CAS-C. Germline branch length for the SNV-only tree was truncated to 100 for better representation.

FIGURE S25

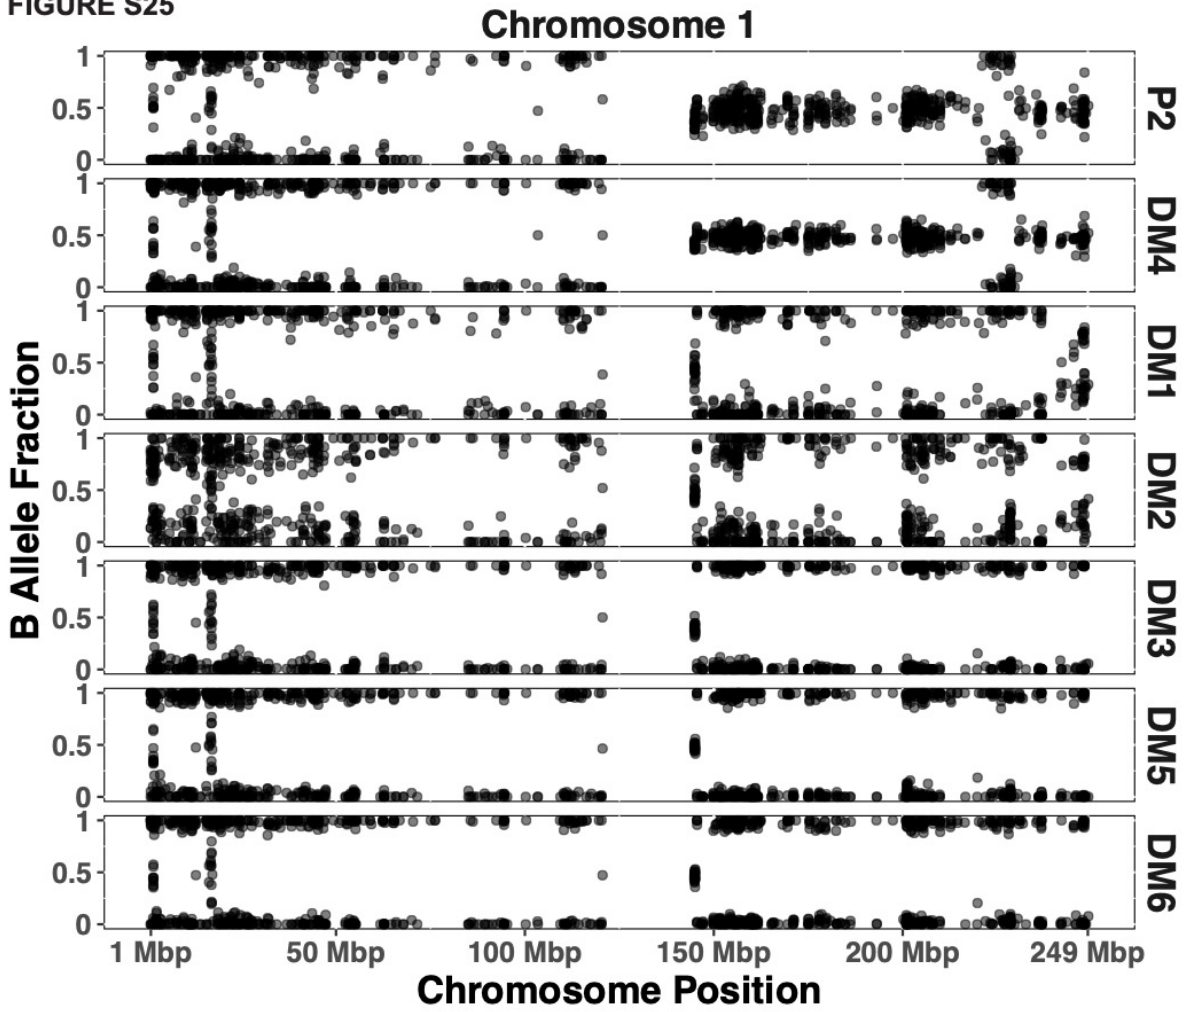

Supplementary Figure 25. B-allele frequencies of heterozygous germline SNPs in chromosome 1 for a primary core (P2) and distant metastases (DM) from patient CAS-D.

FIGURE S26

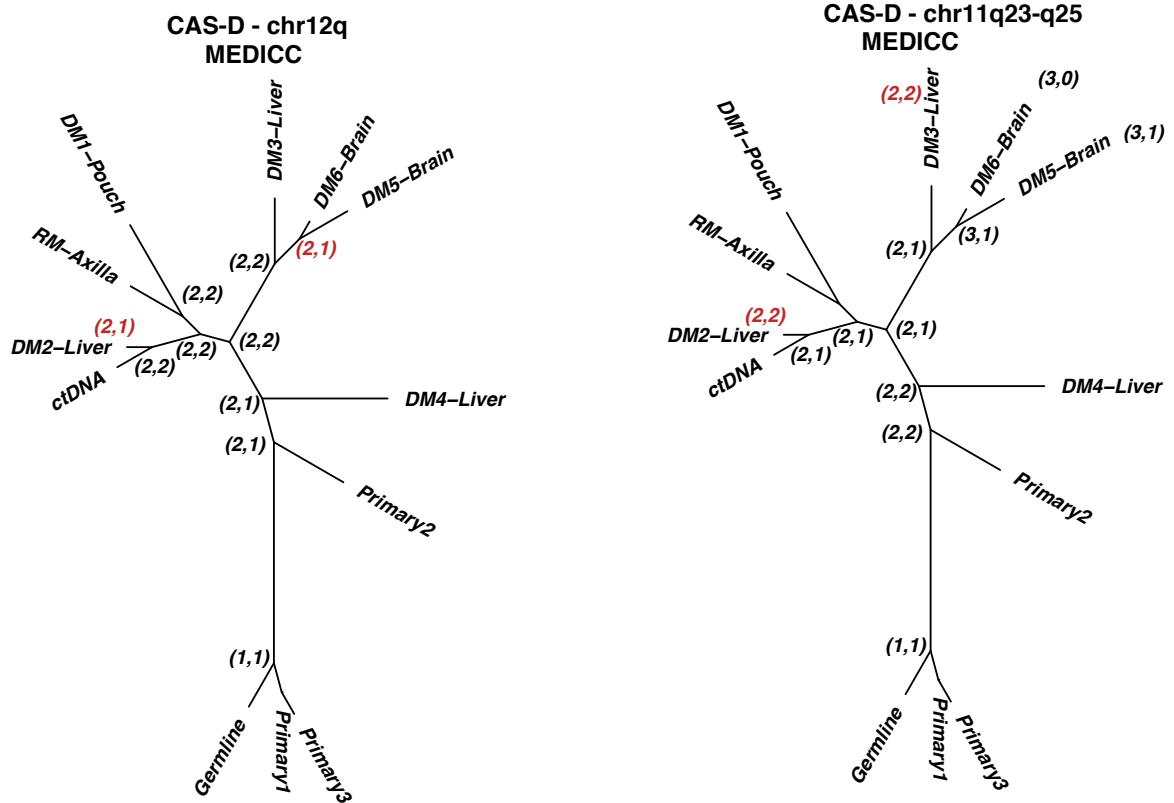

**Supplementary Figure 26. Evidence of convergent evolution in CAS-D.** Numbers in parenthesis indicate major and minor allele-specific copy numbers inferred by MEDICC at each node of the evolutionary tree. Convergent evolution of specific chromosomal regions of chromosomes 11 and 12 in CAS-D were obtained from least common ancestor reconstruction as reported by the MEDICC algorithm. Evolutionary steps for each region are highlighted on the same phylogenetic tree generated for this patient with genome-wide allele-specific copy number.

## Supplementary Notes

### *Experimental validation of somatic single nucleotide variants (SNVs) and small insertions/deletions (InDels)*

Validation of SNVs and small InDels detected with the pipeline used in this study was undertaken on a set of 59 high confidence and 19 low confidence mutations on 46 samples across 7 CASCADE patients (Supplementary Table 3, Supplementary Table 4). These mutations impact genes involved in DNA repair, cell cycle or are genes experimentally determined to be associated with chromosomal instability by previous studies. To determine accuracy, sensitivity and specificity, variants were experimentally validated using targeted amplicon sequencing under the following definitions: positives are high confidence calls that passed all filters for variant calling (see methods). Negatives were either (i) low confidence calls that were filtered out at some point in the variant calling, or (ii) absent calls on samples within a patient for which at least one other sample had a call on that particular variant. Using these definitions, targeted amplicon sequencing validation identified 301 true positives, 174 true negatives, 3 false positives and 51 false negatives. This resulted in an accuracy of 90%, a sensitivity of 86% and a specificity of 98%. This sensitivity was expected given the stringency of the variant calling, as demonstrated by several genes that had low confidence calls that were still validated by targeted amplicon sequencing (e.g. RAD18 in patient CAS-C and REST in patient CAS-E).

### *Comparison of SNV calling from DNA extracted from FFPE vs FF tumour material*

To understand how formalin-fixed paraffin-embedding (FFPE) of tumours might have impacted variant calling, DNA was sequenced from adjacent fresh frozen (FF) and FFPE tumor tissue in a right lung melanoma metastasis from patient CAS-G. This sample was chosen due to the large number of mutations observed, including a high proportion of mutations characteristic of the effect of DNA degradation by FFPE<sup>5</sup>. Summary statistics (Supplementary Table 5) for the library preparation and sequencing showed similar mean coverage (157x FF vs 137x FFPE) and duplicate rates (FF: 5.24%, FFPE: 5.93%). As our SNV calling procedure included multiSNV<sup>6</sup>, which simultaneously uses information from all per patient samples, the same pipeline for calling SNVs on CAS-G was executed separately for FF and FFPE samples (see methods). While 99.3% of ubiquitous FFPE mutations (those found across all tumour sites) and 73.9% of shared FFPE mutations (those found in at least two tumour sites and absent in at least one) were also found in FF material, 57.3% of private FFPE mutations were found in the FF counterpart. These corresponded to 601, 96 and 1,303 ubiquitous, shared and private mutations, respectively. Thus, most mutations in FFPE were also found in FF material and were private to this tumour site (Supplementary Figure 4).

The 987 private mutations found only in FFPE and the 569 private mutations found only in FF could be explained by (i) differences in filtration of variant calling pipeline, such as one variant caller supporting the variant (minimum required is two), or insufficient coverage, (ii) heterogeneity of the samples, and (iii) FFPE-induced artefacts. Of the 987 FFPE-only private mutations, 422 (42.7%) were either called by one variant caller or found in alignment in the FF data. Similarly, of the 569 FF-only private mutations, 307 (53.9%) were found in less stringent conditions in the FFPE counterpart.

Deconvolution of mutational signatures with deconstructSigs<sup>3</sup>, using version 3 of the COSMIC set of signatures (<http://cancer.sanger.ac.uk/cosmic/signatures>) on the remainder of sample-specific private mutations, showed the majority of these associated with signature 11 (FF: 67.4%, FFPE: 68.3%), described as resembling effects of alkylating agents and likely resulting from defective DNA mismatch repair (Supplementary Figure 4). In contrast, a signature of spontaneous deamination by FFPE-based degradation was absent from the deconvolved set of FFPE-only private mutations. Thus, differences in private mutations based on FF and FFPE material were mostly explained by intratumoural heterogeneity as opposed to FFPE artefacts.

In agreement with this, the vast majority of private mutations in FF and FFPE material have a low probability of the mutation being clonal (Supplementary Figure 4).

Comparison of somatic copy number alterations (CNAs) between the same adjacent FFPE and FF samples showed 81.3% agreement for the total CNA calls, 88.2% for the major allele copy number and 91.2% for the minor allele copy number (Supplementary Figure 5). Regions with different copy number calls, such as those in chromosomes 4 and X, agreed with the type of event (i.e. amplifications were called in both chromosomes from both FFPE and FF samples). Differences appeared to be specific to FFPE tissue for this sample, as the patterns for FF tissue agreed with most distant metastases samples for this patient, making it a likely descendant from a common ancestor that carried particular CNAs.

#### *Comparison of CNV-based, SNV-based and joint phylogenetic inference*

Since the dominant mode of evolution of the advanced melanomas in our cohort was copy number change, and mutational losses due to LOH and subclonal are not incorporated into most phylogenetic methods of inference, our focus was initially on copy number-based estimation of phylogenies. However, despite the shortcomings of general phylogenetic approaches for cancer phylogenies<sup>7</sup>, it is useful and interesting to consider evolutionary models based on other mutation types. Indeed, it may be that by taking advantage of more information from other mutation types, alternative phylogenies may be more accurate for some patients. Thus, we set out to infer phylogenies using SNVs only, as well as SNVs and CNAs jointly, using a balanced super-matrix approach.

To estimate trees jointly, we applied the following methodology on the four patients for which CNA-based phylogenies were originally reconstructed. For each patient, a binary supermatrix of SNVs, CNAs and whole genome doubling (GD) event across samples was constructed from the following information sources:

- All called SNVs with an estimated cancer cell fraction (CCF) of 0.5 or higher in at least one sample within the patient. The CCF threshold is applied to be consistent with the fact that the CNA-based phylogeny is constructed using clonal variants. Mutations within regions of shared LOH –i.e. regions where one or more, but not all samples carry LOH - were excluded.



- All CNAs that result in (1) LOH or (2) an estimated amplification or deletion with respect to the average ploidy of the sample, as reported by Murugaesu *et al* <sup>8</sup>. The purpose of this approach is to include regions of partial or total aneuploidy independently of the GD.
- The presence or absence of a GD event across samples.

This binary supermatrix captures (1) single point mutations due to varying mutational processes, (2) partial and total aneuploidy events such as deletions and amplifications specific to individual chromosomes, and (3) a genome doubling event.

Because the relative contribution of SNVs, CNAs and GD to the phylogeny reconstruction process is impacted by the number of variants (*e.g.* GD is represented by only one row in the supermatrix), we assigned different weights to SNVs, CNAs and the GD event in the supermatrix. To achieve this, the maximum count –  $C$  - between the number of informative (*i.e.* excluding autapomorphies) CNAs ( $n_{cnas}$ ) and SNVs ( $n_{snvs}$ ) was used to distribute weights as follows: (1) GD is assigned a weight equal to  $C$ , (2) each SNV is assigned a weight equal to  $round(C/n_{snvs})$ , and (3) each CNA is assigned a weight equal to  $round(C/n_{cnas})$ . For the purpose of accurate branch length reconstruction, and independently of the aforementioned weight distribution, all autapomorphies were included with a weight of 1. We refer to the phylogeny reconstruction based on this input supermatrix as the ***joint-evidence analysis***.

The scenario of a SNV-only phylogeny reconstruction, where SNVs represent 100% of the contribution, was pursued in a separate matrix with each SNV assigned a weight of 1. We refer to the phylogeny reconstruction based on this input matrix as the ***SNV-only analysis***.

The implicit enumeration algorithm (*ienum*; command, which guarantees an optimal solution) implemented in TNT 1.5<sup>9</sup> was used to generate the most parsimonious phylogenies using the equally-weighted supermatrix and SNV-only matrix.

For LOH events, a step matrix was created (*smatrix = 0 1 > 0 i*; command) to force irreversibility of this type of events. All other variants were treated with the same cost for 0 > 1 and 1 > 0 transformation (default).

The topologies of the most parsimonious phylogenies were compared against the topology of the CNA-based tree (reported in Figure 6, hereinafter referred to as the *MEDICC analysis*) using the Robinson-Foulds (RF) distance (*tcomp <;* command), a measure of distance between two phylogenies based on the number of internal splits shared by the two phylogenies<sup>10</sup>. The RF distance varies between 0 (identical topologies) and 1 (no shared internal splits).

In the case of several parsimonious solutions for a given analysis, the one with the closest RF distance to the MEDICC tree was used for further analysis. If two or more solutions were closest to the MEDICC tree, the solution with lowest tree index as outputted by TNT was selected.

Support values for internal nodes within phylogenies were obtained via 1000 iterations of bootstrap resampling on the corresponding matrix (*resample boot frequency replic 1000;* command).

#### *Comparison of MEDICC, SNV-based and joint-evidence phylogenies*

Based on the above methodology, we have made the following observations between trees for each patient:

- CAS-D (Supplementary Figure 21)

Clades or subtrees are generally in good agreement between the three methods with the exception of the position of DM4. In particular, the germline (G) & primaries (P) cluster in all trees. The RM consistently clusters with DM2 (liver), DM1 (Pouch of Douglas) and ctDNA, and it is positioned intermediate between P2 and these DMs in the joint evidence tree. Either the RM did not seed DM3, 5 & 6 or acquired substantial additional mutations after seeding. Position of DM4 is inconsistent between trees. DM4 remains heterozygous on 1q, while RM & all other DMs have an LOH event in that region. There are two possible evolutionary histories suggested by these trees: (i) either LOH occurs twice (joint evidence tree), or (ii) DM4 is seeded from the primary or an unsequenced regional met (MEDICC tree).

The position of DM4, clustered with G, in the SNV-only tree is likely incorrect. Inspection of SNV coordinates for this patient shows eight of the eleven absent variants in lesion DM4

are located in chromosome 10 with coordinates in close proximity to the breakpoints of the intrachromosomal SVs (Figure 3D, Supplementary Figure 14). This suggests the presence/absence of these complex rearrangements play a role in the presence/absence pattern of these mutations on this patient, causing the effect observed in the SNV-only phylogeny.

- CAS-B (Supplementary Figure 22)

P & RM samples are consistently closer to germline than DMs with the exception of DM2 in MEDICC tree. Joint evidence tree captures both GD & truncal UV mutations. The position of RM3 in SNV-only tree implies 2 independent genome doubling events. ctDNA consistently clusters in the clade with DM1 (lung).

- CAS-G (Supplementary Figure 23)

The G, P & RM samples cluster in all trees, but the order of branching is different in the MEDICC tree compared to the SNV-only and joint evidence trees. ctDNA consistently close to DM3 (duodenum). The SNV-based trees suggest the primary acquired additional mutations after the seeding of the regional met. Long branches in the SNV-only tree highlight the Signature 11 mutations.

- CAS-C (Supplementary Figure 24)

G & P cluster consistently. There is no regional met in this patient. DM2 & 3 also cluster consistently in all trees with proximity to DM1. ctDNA appears close to DM4 (brain) across trees. Late whole genome doubling event in DM5 (brain) indicated by a long branch to this sample in the MEDICC tree and to a lesser extent on the joint evidence tree.

### *Comparison with Sanborn et al phylogenies*

The phylogenies for patients MI-F and SK-H reported in Sanborn *et al*<sup>2</sup> were generated via inspection of groups of mutations partially shared among lesions and, based on this, estimation of the presence of subclones within lesions. For patient MI-F the phylogeny is deduced based on SNVs and reports a closer proximity of the LN cervical metastasis (RM2) to the skin distant metastasis (DM) compared to the Locoregional ear metastasis (RM1). The SNV-only tree generated with the methodology described above for this patient (Supplementary Figure 19) in this work also captures the closer proximity of RM2 to DM. For patient SK-H, the phylogeny

is by Sanborn *et al* is based on point mutations deduced to stem from different clones in the primary as well as a shared loss of heterozygosity event in chromosome 4 between the primary and the distant metastasis as well as; we find that the CNA+GD phylogeny captures the proximity of the primary tumour to the brain distant metastasis (Supplementary Figure 20), which includes the shared LOH event in chromosome 4 also called by this study (Figure 3A). These results support the validity of the trees published by Sanborn *et al*.

## **Supplementary Methods**

### *Pre-autopsy tumor material*

Pre-autopsy archival tissues obtained via routine diagnostic procedures were collected from pathology laboratories across Melbourne for each patient, in addition to on treatment tumor biopsies as part of the Melanoma Biomarkers Study (Peter MacCallum Cancer Centre Human Research Ethics Committee approval number: 11/105).

### *Autopsy procedure*

Rapid autopsies were carried out at the Victorian Institute of Forensic Medicine (VIFM, Victoria, Australia) by qualified pathologists, mortuary technical staff and attending researchers to guide tumour sampling and photography. During autopsy, organs were removed from the body and reviewed by a pathologist for the presence of melanoma tissue. Each organ was sectioned every 1-2cm to allow a thorough examination. Metastatic tissues were collected, annotated, photographed and checked macroscopically to minimize the collection of necrotic material. In the laboratory, fresh tumours were photographed and pieces from each placed in 10% NBF and liquid N<sub>2</sub> (snap frozen).

### *Manual microdissection of patient tumour sections.*

Patient formalin-fixed paraffin embedded (FFPE) tissues were sectioned using a microtome. Briefly, 20 sections per patient were cut. The 1st, 10th and 20th sections were cut at a thickness of 3µm for haematoxylin & eosin (H&E), Melan-A and S100 staining to enable localization of viable tumor by a qualified histopathologist. Only samples that contained >70% tumor were used for DNA extraction. The remaining 17 sections were cut at a thickness of 10µm and used for manual microdissection of regions of viable tumor using a fine scalpel under a light microscope (Leica M165FC, Germany) at 0.5x magnification. In cases where adjacent fresh frozen samples were available for DNA extraction (DNeasy blood and tissue kit, Qiagen) but macrodissection was not possible, tumor content was verified using digital PCR for *BRAF* mutations.

### *Genomic DNA Extraction*

Genomic DNA from fresh frozen tissue and buffy coats (used as matching germline DNA) were extracted using the DNeasy blood and tissue kit (Qiagen) according to the manufacturer's protocol. Genomic DNA was extracted from FFPE tissue sections using the QIAamp DNA FFPE Tissue Kit (cat #56404). Briefly, 1ml Xylene was added to each sample and vortexed

vigorously for 10 secs followed by centrifugation for 2 mins at 12,000 RPM. The supernatant was aspirated without disturbing the pelleted material. A further 750µl of Xylene was added, vortexed vigorously for 10secs and centrifuged at 12,000 RMP for 2 mins. The supernatant was aspirated and 1ml of absolute ethanol was added to each sample, vortexed and centrifuged at 12,000 RPM for 2 mins. The supernatant was aspirated and the tube lids were left open at room temperature for 10 mins to ensure complete evaporation of ethanol. Each sample was re-suspended in 540ul Buffer ATL and 60ul proteinase K, vortexed and incubated at 56°C on a heat-block until the following day, with a top-up of 180µl Buffer ATL and 20µl Proteinase K at the end of Day 1. On Day 2, samples were incubated on a heat-block at 90°C for 1 hr and transferred into a clean 2ml micro-centrifuge tube, following brief centrifugation. 400ul Buffer AL was added to each sample and vortexed thoroughly to mix, followed by 400ul of absolute Ethanol (96-100%) and centrifuged at full speed (14,000rpm) for 30 secs. 600µl of each was transferred to a corresponding QIAamp MinElute column and centrifuged at 8000rpm for 1 min. The next 600µl of each lysate was transferred to the same corresponding QIAamp MinElute column and centrifuged at 8000rpm for 1 min. 500ul Buffer AW1 was added to each sample and centrifuged at 8000rpm for 1 min, followed by the addition of 500ul Buffer AW2 and centrifugation at 8000rpm for 1 min. Each sample was centrifuged at full speed for 3 min to dry the membrane completely and 50ul Buffer ATE was added to each sample to the centre of the membrane and incubated at room temperature for 10 min. Finally, each sample was centrifuged at full speed for 1 min to retain the flow-through. After DNA extraction, DNA samples were assessed for integrity <sup>11</sup>.

For plasma DNA extraction, blood was collected in EDTA tubes and processed within two hours of collection. Whole blood was first centrifuged at 1600g for 10 minutes to separate plasma from peripheral blood cells, followed by a further centrifugation at 20,000g for 10 minutes to pellet remaining cells and/or debris. The plasma was then stored at -80°C until DNA extraction. DNA was extracted from 1-2ml aliquots of plasma using the QIAamp Circulating Nucleic Acid Kit (Qiagen, #55114). DNA was eluted into 50µl buffer AVE (Qiagen) and stored at -20°C.

#### *DNA Quantitation*

DNA was quantified using a Qubit fluorometer (Invitrogen) and a Quant-iT dsDNA HS kit (Invitrogen).

### *Whole Exome Sequencing*

Total DNA was measured using Qubit dsDNA HS Assay (Thermo Fisher Scientific). Between 100 ng and 1 ug of input DNA was fragmented using a Covaris S2 focal acoustic device (Covaris) to an average fragment size range of 180-220 bp (duty cycle: 10%; intensity: 5; cycles per burst: 200; time: 3 minutes). Libraries were prepared using the KAPA Hyper Prep Kit for Illumina, (Kapa Biosystems) with SureSelect XT adaptors and primers (Agilent Technologies); 6 or 9 PCR cycles were used for good quality or FFPE-derived DNA, respectively. Hybridization capture was performed with SureSelect Human All Exon V5 or V6 (Agilent Technologies) according to manufacturer's protocols. Three indexed libraries were run per lane on an Illumina HiSeq2500 platform (paired-end 100 bp) according to standard protocols (Illumina).

### *Whole Genome Sequencing*

100 ng of input DNA was fragmented as above to an average fragment size of 350 bp (duty cycle: 5%; intensity: 5; cycles per burst: 200; time: 50 seconds). Libraries were prepared using the TruSeq Nano DNA Library Preparation Kit (Illumina) using standard protocols. Libraries were sent to the Ramaciotti Centre for Genomics (Sydney, Australia) for QC, and sequencing was done at The Kinghorn Centre for Clinical Genomics (Sydney, Australia) on a HiSeq X Ten system (Illumina). One sample was sequenced per lane or over several lanes (paired-end 150bp) to a depth of 30X or 60X for germline or tumour, respectively.

### *Targeted Amplicon sequencing validation*

Targeted amplicon (TA) sequencing was performed using the 48.48 Access Array™ system (Fluidigm), as described previously<sup>12</sup>. Missense variants predicted to be probably damaging by Polyphen2<sup>13</sup> or deleterious by SIFT<sup>14</sup>, splice donor/acceptor variants, small indels as well as COSMIC variants occurring on the set of cell cycle, DNA repair and CIN-associated genes (see below) were used for validation. Primer sequences used are shown in Table S4. Samples were amplified with tagged target-specific primers in a microfluidic platform, which allowed 48 samples to be analyzed simultaneously with multiplexed assays in 2,448 reaction chambers. Following amplification, products were harvested, tagged with sample-specific barcodes, pooled together and purified using AMPure XP beads. All samples were analyzed in duplicate to control for PCR artefacts. The purified libraries were then sequenced with the MiSeq system (Illumina) using paired end sequencing with v2 150-bp kits.

Bcl2fastq was used to perform sample de-multiplexing and to convert BCL files generated from the MiSeq instrument into FASTQ files containing short-read data. Reads were assembled, aligned and variant called using two methods (i) a non-global alignment method developed in-house (known as *Primal*), which is based on a modified Smith-Waterman algorithm and (ii) *Canary*<sup>15</sup>.

#### *Somatic Single Nucleotide Variant and small Insertion/Deletion detection*

Reads were quality-checked using FastQC v0.11.2 (<http://www.bioinformatics.babraham.ac.uk/projects/fastqc/>) and detected adapters removed using cutadapt<sup>16</sup> (v1.7.1) with a required minimum length (-m=35) and quality cutoff (-q=15). Reads were aligned against the hg19 version of the human genome using bwa<sup>17</sup> mem (v0.7.12). Aligned reads were further processed for marking of duplicates with picard v1.128 (<http://picard.sourceforge.net/>), and local indel realignment and base recalibration with the Genome Analysis Toolkit<sup>18</sup> (GATK v3.4.0). Reads marked as duplicates or with a mapping quality < 30 were excluded from further analysis.

Somatic Single Nucleotide Variants (SNVs) and small Insertions/Deletions (InDels) were detected for each tumour sample separately using the intersection of at least two variant callers of multiSNV<sup>6</sup> (v2.3), VarScan<sup>219</sup> (v.2.3), muTect<sup>20</sup> (v3.1.0) and IndelGenotyper<sup>18</sup> (v1.04905). Variants (i) with total coverage below 10X in any of the tumour samples or the germline DNA, (ii) overlapping with annotated repetitive sequences by RepeatMasker<sup>21</sup>, (iii) overlapping with low complexity sequences<sup>22</sup>, (iv) present on the Exome Variant Server vESP6500 (<http://evs.gs.washington.edu/EVS>) or the 1000 genome database<sup>23</sup>, and (v) overlapping with artifact-generating and other regions prone to false positives such as CDC27, mucins, ryanodine receptors and olfactory receptors<sup>24,25</sup> were filtered. Mutations/Mbp were computed based on the total number of base pairs targeted, using a haploid genome as reference as follows: (i) The number of total Mbp in the denominator was calculated by subtracting the non-overlapping sum of centromeric, telomeric, repetitive and artifactual regions from the total number of base pairs in the Whole Exome Sequencing (WES) platform as represented in the targets bed file. This was done since variants called within those regions are filtered out during the variant calling process. In the case of WES, this results in 47.5 (Agilent v5) to 64.9 (Agilent v4+UTR) Mbp targeted in a haploid genome. In the case of WGS, this results in 1,360 Mbp of reference haploid genome from an original 3,100 Mbp. These values present slight differences depending on the gender of the patient, which was also accounted for in the



calculation. (ii) The total number of mutations was divided by the estimate in (i). Since patients CAS-A and CAS-F were sequenced at the whole genome level, in order to make them comparable to those sequenced at the exome level in Figures 1B and 1C, mutations (Figure 1B) and mutational load (Figure 1C) were calculated at the whole exome level using Agilent v5 regions.

The fraction of mutated alleles in the tumour cells (MAFs) for each variant was estimated based on the procedure described by Anagnostou *et al*<sup>26</sup> as follows. Given  $r$  reads supporting a variant from a total of  $N$ , the likelihood of observing  $r$  reads is assumed to follow a binomial distribution with probability  $V_{exp}$ <sup>26</sup>. Based on this assumption, a likelihood was calculated over a grid of CCF values  $c \in [0.01-1]$  and multiplicity  $m \in (CN_{MIN}, CN_{MAJ})$  - if  $CN_{MIN} > 0$  - or  $m = CN_{MAJ}$  otherwise, where  $CN_{MIN}$  and  $CN_{MAJ}$  are the minor and major allele copy number estimates for the genomic region that contains the variant. Likelihoods were normalized to add up to 1. The combination of multiplicity and CCF values with highest likelihood for the variant was used to estimate the MAF as  $m \cdot c / CN_{TOT}$ , where  $CN_{TOT}$  is the total copy number estimate for the genomic region that contains the variant. If two or more solutions of  $m \cdot c$  maximized likelihood for a given variant, the solution with the highest CCF was used.

Germline SNPs used for assessment of allelic imbalances among samples of the same patient were obtained using the HaplotypeCaller function of GATK. Briefly, patterns of corrected BAF<sup>27</sup> of mutations in the tumour corresponding to heterozygote calls in the germline DNA ( $0.4 \leq AF \leq 0.6$ ) were inspected across chromosomes between tumour samples to detect regions where opposite alleles had undergone an allelic imbalance event.

#### *Mutational signatures, melanoma and cancer-associated genes, chromosomal instability and genomic integrity-associated genes*

Mutational signatures were assessed using the deconstructSigs package (v1.9.0) with the cosmic signatures set V3<sup>3</sup>. To avoid spurious results due to low number of mutations in the assessment of mutational signatures involved in disease progression, mutations from all late-stage disease sites were pooled into one input dataset for each patient separately.

Significantly mutated genes in the melanoma TCGA cohort as calculated by the MutSig method (Q-value < 0.1) were retrieved from the cBioPortal for Cancer Genomics

(<http://www.cbioportal.org/> - accessed February 2015). COSMIC cancer census genes<sup>28</sup> were retrieved from the COSMIC database v78 (<http://cancer.sanger.ac.uk/census>, accessed October 2016). Residues identified as statistically significant mutational hotspots (Q-value<0.01) were obtained as provided in the pan-cancer study by Chang *et al*<sup>29</sup>.

Mutations with the potential to explain the observed patterns of aneuploidy and genome doubling events were detected by collating sets of genes into the following sets: (1) Genes associated with cell cycle and DNA repair pathways - as reported in reactome database<sup>30</sup> - were retrieved using the reactome.db R package<sup>31</sup>. (2) Genes previously associated with chromosomal instability (CIN) reported/reviewed by several studies<sup>32-35</sup> were collated to generate a list of CIN-associated genes. (3) Genes carrying mutations with increased dosage in tumour sites carrying the genome doubling event (GD group) compared to sites without the event (no-GD group) such as gained mutations, mutations associated with LOH events and mutations with increased multiplicity in patients CAS-G, CAS-D, CAS-B, CAS-C and ETH-E. The average estimated fraction of mutated alleles in the tumour cells (MAF) was set to 16% or greater in the GD group to represent expected changes in MAF due to increased multiplicity, with no less than 10% difference between the maximum MAF of the no-GD group and the minimum MAF of the GD group. GO slim terms associated to these genes were annotated using the biomaRt data mining tool available at <http://grch37.ensembl.org/>.

#### *Neoantigen prediction and predicted expression in TCGA cohort*

For each patient, germline DNA was used to predict the 4-digit types of HLA-A, HLA-B and HLA-C alleles with OptiType v1.0<sup>36</sup>. Experimental molecular HLA typing of the germline DNA done at the Australian Red Cross Blood Service for CAS-D validates OptiType 4-digit prediction for the three alleles. The impact of variants on protein-coding ENSEMBL GRCh37.75 transcripts was assessed simultaneously to ensure proper evaluation of adjacent mutations on same residues<sup>37</sup>. Mutated 17-mers centered around each amino acid change for each transcript and the predicted HLA class I alleles were provided as input to NetMHC v4.0<sup>38,39</sup> with default settings.

CooVar-v0.07<sup>37</sup> was used to simultaneously evaluate the impact of SNVs on protein-coding ENSEMBL GRCh37.75 transcripts for each tumour lesion in each patient; this ensures proper evaluation of adjacent mutations on same residues. The ‘categorized-gvs.gvf’ and ‘variant\_peptides.fasta’ files generated by CooVar for each tumour lesion were used to extract

the mutated 17-mers centered around each amino acid change for each transcript in fasta format. This was done using a script `generate-epitope-sequence.pl` (available at <https://github.com/PapenfussLab/CascadeNeoPipe>).

The extracted 17-mers and the predicted HLA class I alleles obtained with OptiType 1.0 were provided as input to netMHC v4.0 with default settings and a peptide length (-l parameter) of 9 for MHC class I affinity prediction as trained by this tool from quantitative peptide-MHC class I affinity measurements from the IEDB (PMID: 26515819). For each patient, a matrix of mutations with its coordinates versus samples and associated expression of the gene as obtained from the TCGA cohort was generated where each mutation in each sample was labeled as strong binder (2), weak binder (1), no binder (0) or not mutated (-1).

Overlap of mutation coordinates (including neoantigenic mutations) with other chromosomal regions including regions of LOH, amplification and deletion was obtained with the *findOverlaps* function of the GenomicRanges R package.

Expression of predicted neoantigens was estimated using the median of log<sub>2</sub>-transformed normalised count data from the TCGA SKCM cohort generated using RSEM<sup>40</sup> as provided in the legacy archive of GDC (<https://portal.gdc.cancer.gov/legacy-archive/> (previously [https://tcga-data.nci.nih.gov/tcgafiles/ftp\\_auth/distro\\_ftpusers/anonymous/tumor/skcm/cgcc/unc.edu/illumina/illuminahisq\\_rnaseqv2/rnaseqv2/unc.edu\\_SKCM.IlluminaHiSeq\\_RNASeqV2.Level\\_3.1.14.0/](https://tcga-data.nci.nih.gov/tcgafiles/ftp_auth/distro_ftpusers/anonymous/tumor/skcm/cgcc/unc.edu/illumina/illuminahisq_rnaseqv2/rnaseqv2/unc.edu_SKCM.IlluminaHiSeq_RNASeqV2.Level_3.1.14.0/), accessed September 2015) by selecting only those with suffix `.rsem.genes.normalized_results`. Neoantigens in genes with median log<sub>2</sub> normalized counts greater than or equal to 5 were considered to be predicted expressed neoantigens. This threshold was selected empirically by inspection of the distribution of log<sub>2</sub> normalised expected counts.

#### *Characterisation of variants deleted due to loss of heterozygosity*

For each LOH event acquired in late-stage disease, four quantities were recorded: (i) number of synonymous mutations, (ii) number of non-synonymous mutations, (iii) number of neoantigenic mutations, and (iv) number of non-neoantigenic mutations lost in each late-stage lesion. Neoantigenic mutations were those resulting in neoepitopes of predicted weak or strong binding affinity to any of the HLA class I alleles of the patient. Non-neoantigenic mutations

were synonymous mutations, as well as non-synonymous mutations not predicted to have binding affinity to the HLA alleles of the patient.

Over-segmentation of LOH regions could generate short artifactual events, which may not include the variants that are under selection, particularly in WES data. To explore this, we compared the LOH segment lengths from WGS of five fresh samples from patient CAS-D and WES of matched FFPE samples from the same tumours (Supplementary Figure 10C). This shows that for segments longer than 10Mb, there was good agreement between WES and WGS LOH calls, but there was substantial disagreement for smaller segments, supporting the idea of over-segmentation.

Based on published codon usage bias frequencies (<https://hive.biochemistry.gwu.edu>), the expected ratio of the number of non-synonymous mutations to the number of synonymous (NS:S) mutations was estimated to be 3.39. Using this threshold, two groups of large acquired LOH segments (>10Mb) were defined: non-synonymous above expected (NS>3.39S) and non-synonymous less than expected (NS<3.39S).

Across all patients, there were 194 large acquired LOH segments. Of these, 67 segments deleted more non-synonymous mutations than expected; 80 deleted fewer non-synonymous mutations than expected; and 47 deleted zero mutations. Under the null model of uniform distribution and no selection, we expect equal probability of being above or below the threshold, however, need to deal with LOH regions with no mutations deleted. We modelled this using the Binomial distribution, treating regions that deleted no mutations or fewer non-synonymous mutations than expected with probability  $p_{\text{failure}} = (1+p_{\text{zero}})/2$ , where  $p_{\text{zero}}$  is the probability that an LOH event does not delete any mutations and was estimated from the data; regions that deleted more non-synonymous mutations than the expected was treated as a success with  $p_{\text{success}} = 1-p_{\text{failure}}$ .

Additionally, we classified each segment as high neoantigenic load if the proportion for that acquired LOH segment is greater than the observed proportion across the entire tumour genome, including no LOH and other AI regions, and low neoantigenic load otherwise. Based on the NS:S>3.39, NS:S<3.39, high neoantigenic load and low neoantigenic load groups, we created a 2x2 table for each patient and tested for mutual exclusivity using one-sided Barnard's exact tests with the Exact R package.

### *Somatic copy number alterations detection and CNV-based phylogeny*

Estimates of allele-specific copy number, tumour purity and ploidy within each sample were obtained using Sequenza<sup>41</sup> with a median normalization method and with appropriate gender setting per patient. In order to avoid spurious segmentation of small regions, the gamma and kmin parameters for the aspcf function were set to 500 and 100 resp. for the WGS samples. Manual inspection of Sequenza results prompted the utilization of the second optimal ploidy and purity solution for copy number calling in samples CAS-G-76, CAS-D-ctDNA, CAS-D-62, ETH-F-P4 and CAS-B-15B08317-3A. For samples ETH-E-E1 and CAS-C-44, Sequenza's two optimal solutions resulted in spurious copy number profiles; for these two samples, facets<sup>42</sup> with default settings was used instead, with bam files pre-processed using the snp-pileup command with `-q 30, -Q 30 and -r 10,10`. MEDICC<sup>43</sup> was used for CNV-based phylogeny, using allele-specific copy number calls summarized at the cytogenetic band level. Support values for each node were obtained by resampling of the distance matrix for each patient using the `medicc.resample.distance.matrices` function from the MEDICCquant R package. These matrices were used as input for the `fitch` function of the phylip-3.695 package<sup>44</sup> using the Fitch-Margoliash method to generate trees followed by the `consense` function using the majority rule (extended) method to generate consensus trees. Visualization of phylogenies were generated using the `plot.phylo` command of the ape R package<sup>45</sup> providing as input the newick representation of each tree.

### *Structural variant detection*

Large (>1000 bps) somatic SVs were detected based on whole-genome sequencing using the Genomic Rearrangement Identification Software Suite (GRIDSS) excluding blacklisted regions identified by ENCODE<sup>46</sup>. Briefly, GRIDSS performs genome-wide break-end assembly and combines assembly, read pair, and split read evidence in a probabilistic structural variant scoring model. In order to avoid spurious calls within breakpoints due to micro-homology, the ability of GRIDSS to process multiple samples simultaneously was used, which resolves breakpoints jointly for a given SV across samples. SVs were kept if they were absent in the germline DNA sample and if the quality score was in the top 10 percentile for at least one of the samples.

### *Fluorescence In-Situ Hybridisation*

Fluorescence *in-situ* hybridisation (FISH) was performed for several cases to validate copy number results. Several probes were chosen for their relevance to the required validation, namely *Myc/CEP8* and *CCND1/CEP11* probes for gene amplification and *CDKN2A/CEP9* probes to identify gene loss. Four micron FFPE tissue sections were incubated at 60°C for 1 hour to melt the paraffin, then further deparaffinised through several xylene baths, rehydrated through graded alcohols and washed in water. Target retrieval was performed in Heat Pretreatment Solution (Invitrogen) in a pressure cooker at 125°C for 2½ min followed by washing in water. Sections were then treated with Enzyme Pretreatment Reagent (Invitrogen) for 15 min at 37°C, washed in water, dehydrated through 2 min washes in 70%, 80%, 90% and 100% alcohol solutions and air dried. Probe mix was added to a small area of the tissue section and the slide was coverslipped and sealed with rubber cement to prevent evaporation during hybridisation. Slides were placed on a StatSpin Hybridiser (Dako) for denaturation for 5 min at 80°C followed by hybridisation for 18 hours at 37°C. After hybridisation coverslips were removed and slides washed in two solutions of a 0.5x SSC stringent wash buffer; for 2 min at room temperature followed by 5 min at 75°C. Slides were then washed in water, mounted in Vectashield mounting medium with Dapi (Vector), coverslipped and stored at 4°C in the dark prior to scoring.

FISH slides were scored on an Olympus BX51 fluorescence microscope. For each slide the area to be scored was identified at low (10x) magnification using the DAPI filter. A minimum of 100 cells, typically 30-40 from at least three fields, were scored for the number of gene (red) and chromosome (green) signals at high (100x) magnification. Raw data were entered into a Microsoft Excel spreadsheet for calculation of gene and chromosome copy number status.

## Supplementary References

- 1 Raaijmakers, M. I. *et al.* Co-existence of BRAF and NRAS driver mutations in the same melanoma cells results in heterogeneity of targeted therapy resistance. *Oncotarget* **7**, 77163-77174, doi:10.18632/oncotarget.12848 (2016).
- 2 Sanborn, J. Z. *et al.* Phylogenetic analyses of melanoma reveal complex patterns of metastatic dissemination. *Proc Natl Acad Sci U S A* **112**, 10995-11000, doi:10.1073/pnas.1508074112 (2015).
- 3 Rosenthal, R., McGranahan, N., Herrero, J., Taylor, B. S. & Swanton, C. DeconstructSigs: delineating mutational processes in single tumors distinguishes DNA repair deficiencies and patterns of carcinoma evolution. *Genome Biol* **17**, 31, doi:10.1186/s13059-016-0893-4 (2016).
- 4 Landau, D. A. *et al.* Evolution and impact of subclonal mutations in chronic lymphocytic leukemia. *Cell* **152**, 714-726, doi:10.1016/j.cell.2013.01.019 (2013).
- 5 Do, H. & Dobrovic, A. Dramatic reduction of sequence artefacts from DNA isolated from formalin-fixed cancer biopsies by treatment with uracil-DNA glycosylase. *Oncotarget* **3**, 546-558 (2012).
- 6 Josephidou, M., Lynch, A. G. & Tavaré, S. multiSNV: a probabilistic approach for improving detection of somatic point mutations from multiple related tumour samples. *Nucleic Acids Res* **43**, e61, doi:10.1093/nar/gkv135 (2015).
- 7 Beerenwinkel, N., Schwarz, R. F., Gerstung, M. & Markowetz, F. Cancer evolution: mathematical models and computational inference. *Syst Biol* **64**, e1-25, doi:10.1093/sysbio/syu081 (2015).
- 8 Murugaesu, N. *et al.* Tracking the genomic evolution of esophageal adenocarcinoma through neoadjuvant chemotherapy. *Cancer Discov* **5**, 821-831, doi:10.1158/2159-8290.CD-15-0412 (2015).
- 9 Goloboff, P. A., Farris, J. S. & Nixon, K. C. TNT, a free program for phylogenetic analysis. *Cladistics* **24**, 774-786, doi:doi:10.1111/j.1096-0031.2008.00217.x (2008).
- 10 Robinson, D. F. & Foulds, L. R. Comparison of phylogenetic trees. *Mathematical Biosciences* **53**, 131-147, doi:https://doi.org/10.1016/0025-5564(81)90043-2 (1981).
- 11 Wong, S. Q. *et al.* Targeted-capture massively-parallel sequencing enables robust detection of clinically informative mutations from formalin-fixed tumours. *Sci Rep* **3**, 3494, doi:10.1038/srep03494 (2013).
- 12 Wong, S. Q. *et al.* Circulating Tumor DNA Analysis and Functional Imaging Provide Complementary Approaches for Comprehensive Disease Monitoring in Metastatic Melanoma. *JCO Precision Oncology*, 1-14, doi:10.1200/po.16.00009 (2017).
- 13 Adzhubei, I. A. *et al.* A method and server for predicting damaging missense mutations. *Nat Methods* **7**, 248-249, doi:10.1038/nmeth0410-248 (2010).
- 14 Ng, P. C. & Henikoff, S. Predicting deleterious amino acid substitutions. *Genome Res* **11**, 863-874, doi:10.1101/gr.176601 (2001).
- 15 Doig, K. D. *et al.* Canary: an atomic pipeline for clinical amplicon assays. *BMC Bioinformatics* **18**, 555, doi:10.1186/s12859-017-1950-z (2017).
- 16 Martin, M. Cutadapt removes adapter sequences from high-throughput sequencing reads. *EMBnet. J.* **17**, 10-12 (2011).
- 17 Li, H. & Durbin, R. Fast and accurate short read alignment with Burrows-Wheeler transform. *Bioinformatics* **25**, 1754-1760, doi:10.1093/bioinformatics/btp324 (2009).

- 18 McKenna, A. *et al.* The Genome Analysis Toolkit: a MapReduce framework for analyzing next-generation DNA sequencing data. *Genome Res* **20**, 1297-1303, doi:10.1101/gr.107524.110 (2010).
- 19 Koboldt, D. C. *et al.* VarScan 2: somatic mutation and copy number alteration discovery in cancer by exome sequencing. *Genome Res* **22**, 568-576, doi:10.1101/gr.129684.111 (2012).
- 20 Cibulskis, K. *et al.* Sensitive detection of somatic point mutations in impure and heterogeneous cancer samples. *Nat Biotechnol* **31**, 213-219, doi:10.1038/nbt.2514 (2013).
- 21 Smit, A. F. A., Hubley, R. & Green, P. *RepeatMasker Open-4.0*, <<http://www.repeatmasker.org>> (2013-2015).
- 22 Li, H. Toward better understanding of artifacts in variant calling from high-coverage samples. *Bioinformatics* **30**, 2843-2851, doi:10.1093/bioinformatics/btu356 (2014).
- 23 Genomes Project, C. *et al.* An integrated map of genetic variation from 1,092 human genomes. *Nature* **491**, 56-65, doi:10.1038/nature11632 (2012).
- 24 Li, M. X. *et al.* Predicting mendelian disease-causing non-synonymous single nucleotide variants in exome sequencing studies. *PLoS Genet* **9**, e1003143, doi:10.1371/journal.pgen.1003143 (2013).
- 25 Lawrence, M. S. *et al.* Mutational heterogeneity in cancer and the search for new cancer-associated genes. *Nature* **499**, 214-218, doi:10.1038/nature12213 (2013).
- 26 Anagnostou, V. *et al.* Evolution of Neoantigen Landscape During Immune Checkpoint Blockade in Non-Small Cell Lung Cancer. *Cancer Discovery*, doi:10.1158/2159-8290.cd-16-0828 (2017).
- 27 Li, Y. & Xie, X. Deconvolving tumor purity and ploidy by integrating copy number alterations and loss of heterozygosity. *Bioinformatics* **30**, 2121-2129, doi:10.1093/bioinformatics/btu174 (2014).
- 28 Futreal, P. A. *et al.* A census of human cancer genes. *Nat Rev Cancer* **4**, 177-183, doi:10.1038/nrc1299 (2004).
- 29 Chang, M. T. *et al.* Identifying recurrent mutations in cancer reveals widespread lineage diversity and mutational specificity. *Nat Biotechnol* **34**, 155-163, doi:10.1038/nbt.3391 (2016).
- 30 Joshi-Tope, G. *et al.* Reactome: a knowledgebase of biological pathways. *Nucleic Acids Res* **33**, D428-432, doi:10.1093/nar/gki072 (2005).
- 31 Ligtenberg, W. reactome.db: A set of annotation maps for reactome. (2017).
- 32 Maiato, H. & Logarinho, E. Mitotic spindle multipolarity without centrosome amplification. *Nat Cell Biol* **16**, 386-394 (2014).
- 33 Thompson, S. L., Bakhoum, S. F. & Compton, D. A. Mechanisms of chromosomal instability. *Curr Biol* **20**, R285-295, doi:10.1016/j.cub.2010.01.034 (2010).
- 34 Nigg, E. A. Centrosome aberrations: cause or consequence of cancer progression? *Nat Rev Cancer* **2**, 815-825, doi:10.1038/nrc924 (2002).
- 35 Valente, D. *et al.* HIPK2 deficiency causes chromosomal instability by cytokinesis failure and increases tumorigenicity. *Oncotarget* **6**, 10320-10334, doi:10.18632/oncotarget.3583 (2015).
- 36 Szolek, A. *et al.* OptiType: precision HLA typing from next-generation sequencing data. *Bioinformatics* **30**, 3310-3316, doi:10.1093/bioinformatics/btu548 (2014).
- 37 Vergara, I. A., Frech, C. & Chen, N. CooVar: co-occurring variant analyzer. *BMC Res Notes* **5**, 615, doi:10.1186/1756-0500-5-615 (2012).



- 38 Nielsen, M. *et al.* Reliable prediction of T-cell epitopes using neural networks with novel sequence representations. *Protein Sci* **12**, 1007-1017, doi:10.1110/ps.0239403 (2003).
- 39 Andreatta, M. & Nielsen, M. Gapped sequence alignment using artificial neural networks: application to the MHC class I system. *Bioinformatics* **32**, 511-517, doi:10.1093/bioinformatics/btv639 (2016).
- 40 Li, B. & Dewey, C. N. RSEM: accurate transcript quantification from RNA-Seq data with or without a reference genome. *BMC Bioinformatics* **12**, 323, doi:10.1186/1471-2105-12-323 (2011).
- 41 Favero, F. *et al.* Sequenza: allele-specific copy number and mutation profiles from tumor sequencing data. *Ann Oncol* **26**, 64-70, doi:10.1093/annonc/mdu479 (2015).
- 42 Shen, R. & Seshan, V. E. FACETS: allele-specific copy number and clonal heterogeneity analysis tool for high-throughput DNA sequencing. *Nucleic Acids Res* **44**, e131, doi:10.1093/nar/gkw520 (2016).
- 43 Schwarz, R. F. *et al.* Phylogenetic quantification of intra-tumour heterogeneity. *PLoS Comput Biol* **10**, e1003535, doi:10.1371/journal.pcbi.1003535 (2014).
- 44 Felsenstein, J. *PHYLIP (Phylogeny Inference Package) version 3.6.*, 2005).
- 45 Paradis, E. *et al.* Package 'ape': Analysis of Phylogenetics and Evolution. 1-283 (2017).
- 46 Cameron, D. L. *et al.* GRIDSS: sensitive and specific genomic rearrangement detection using positional de Bruijn graph assembly. *Genome Res*, doi:10.1101/gr.222109.117 (2017).

## Supplementary Tables

**Supplementary Table 1. Sample information for the 7 CASCADE patients.**

| Case  | Sample      | Material   | Type  | Figure ID | Kit                                   | Mean Coverage | Purity Estimate | Organ                                 |
|-------|-------------|------------|-------|-----------|---------------------------------------|---------------|-----------------|---------------------------------------|
| CAS-G | CAS-G-71    | FFPE       | DM    | DM3       | Agilent SureSelect Human All Exome V5 | 150.07        | 0.78            | small bowel duodenum                  |
| CAS-G | CAS-G-72    | FFPE       | DM    | DM4       | Agilent SureSelect Human All Exome V5 | 137.61        | 0.79            | small bowel ileum                     |
| CAS-G | CAS-G-74    | FFPE       | DM    | DM1       | Agilent SureSelect Human All Exome V5 | 147.41        | 0.8             | liver left lobe                       |
| CAS-G | CAS-G-75    | FFPE       | DM    | DM2       | Agilent SureSelect Human All Exome V5 | 132.22        | 0.77            | liver right lobe                      |
| CAS-G | CAS-G-76    | FFPE       | DM    | DM5       | Agilent SureSelect Human All Exome V5 | 141.89        | 0.75            | left lung lower lobe                  |
| CAS-G | CAS-G-77    | FFPE       | DM    | NA        | Agilent SureSelect Human All Exome V5 | 137.43        | 0.69            | right lung lower lobe                 |
| CAS-G | CAS-G-77FF  | FF         | DM    | DM6       | Agilent SureSelect Human All Exome V5 | 156.93        | 0.87            | right lung lower lobe                 |
| CAS-G | CAS-G-91    | FFPE       | P     | P         | Agilent SureSelect Human All Exome V5 | 160.14        | 0.76            | left ear                              |
| CAS-G | CAS-G-94    | FFPE       | RM    | RM        | Agilent SureSelect Human All Exome V5 | 132.59        | 0.78            | parotid gland                         |
| CAS-G | CAS-G-ctDNA | Plasma     | ctDNA | ctDNA     | Agilent SureSelect Human All Exome V5 | 236.37        | 0.76            | NA                                    |
| CAS-G | CAS-G-GL    | Buffy Coat | G     | NA        | Agilent SureSelect Human All Exome V5 | 159.12        | NA              | NA                                    |
| CAS-D | CAS-D-ctDNA | Plasma     | ctDNA | ctDNA     | Agilent SureSelect Human All Exome V5 | 161.43        | 0.39            | NA                                    |
| CAS-D | CAS-D-60    | FFPE       | DM    | DM1       | Agilent SureSelect Human All Exome V5 | 145.6         | 0.53            | pouch of douglas                      |
| CAS-D | CAS-D-61-1  | FFPE       | P     | P1        | Agilent SureSelect Human All Exome V5 | 138.96        | 0.36            | excision bx of lesion on back core #1 |
| CAS-D | CAS-D-61-2  | FFPE       | P     | P2        | Agilent SureSelect Human All Exome V5 | 143.87        | 0.52            | excision bx of lesion on back core #2 |
| CAS-D | CAS-D-61-3  | FFPE       | P     | P3        | Agilent SureSelect Human All Exome V5 | 130.12        | 0.34            | excision bx of lesion on back core #3 |
| CAS-D | CAS-D-62    | FFPE       | RM    | RM        | Agilent SureSelect Human All Exome V5 | 182.72        | 0.63            | right axillary dissection             |
| CAS-D | CAS-D-64    | FFPE       | DM    | DM2       | Agilent SureSelect Human All Exome V5 | 148.18        | 0.4             | liver Right lobe                      |
| CAS-D | CAS-D-65    | FFPE       | DM    | DM3       | Agilent SureSelect Human All Exome V5 | 107.89        | 0.77            | liver central                         |
| CAS-D | CAS-D-66    | FFPE       | DM    | DM4       | Agilent SureSelect Human All Exome V5 | 135.24        | 0.7             | left Liver                            |
| CAS-D | CAS-D-68    | FFPE       | DM    | DM5       | Agilent SureSelect Human All Exome V5 | 136           | 0.73            | brain - right hippocampus             |
| CAS-D | CAS-D-70    | FFPE       | DM    | DM6       | Agilent SureSelect Human All Exome V5 | 126.94        | 0.7             | brain - left parietal                 |
| CAS-D | CAS-D-89    | Buffy Coat | G     | NA        | Agilent SureSelect Human All Exome V5 | 122.37        | NA              | NA                                    |
| CAS-E | CAS-E-1     | FFPE       | DM    | DM1       | Agilent SureSelect Human All Exome V5 | 200.17        | 0.8             | peri appendix/outer app               |
| CAS-E | CAS-E-10    | FFPE       | RM    | RM        | Agilent SureSelect Human All Exome V5 | 188.73        | 0.33            | sentinel lymph node                   |
| CAS-E | CAS-E-3     | FFPE       | DM    | DM2       | Agilent SureSelect Human All Exome V5 | 174.85        | 0.53            | neck r lump/medistineal skin          |
| CAS-E | CAS-E-4     | FFPE       | DM    | DM3       | Agilent SureSelect Human All Exome V5 | 192.8         | 0.74            | lung r lower lobe                     |
| CAS-E | CAS-E-5     | FFPE       | DM    | DM4       | Agilent SureSelect Human All Exome V5 | 170.24        | 0.27            | mediastinal mass                      |
| CAS-E | CAS-E-6     | FFPE       | DM    | DM5       | Agilent SureSelect Human All Exome V5 | 204.3         | 0.61            | upper mediastinal mass/skin           |
| CAS-E | CAS-E-8     | FFPE       | P     | P         | Agilent SureSelect Human All Exome V5 | 172.81        | 0.29            | tumour neck                           |
| CAS-E | CAS-E-83    | Buffy Coat | G     | NA        | Agilent SureSelect Human All Exome V5 | 152.72        | NA              | NA                                    |
| CAS-C | CAS-C-37    | FFPE       | DM    | DM1       | Agilent SureSelect Human All Exome V5 | 110.4         | 0.84            | small bowel                           |
| CAS-C | CAS-C-40    | FF         | DM    | DM2       | Agilent SureSelect Human All Exome V5 | 133.73        | 0.81            | liver left lobe                       |
| CAS-C | CAS-C-41    | FFPE       | DM    | DM3       | Agilent SureSelect Human All Exome V5 | 126.88        | 0.63            | liver right lobe                      |
| CAS-C | CAS-C-42    | FF         | DM    | DM4       | Agilent SureSelect Human All Exome V5 | 154.38        | 0.67            | brain - l temporal lobe               |
| CAS-C | CAS-C-43    | FF         | DM    | DM6       | Agilent SureSelect Human All Exome V5 | 158.68        | 0.63            | brain - r parietal lobe (outer s)     |
| CAS-C | CAS-C-44    | FFPE       | DM    | DM5       | Agilent SureSelect Human All Exome V5 | 131.08        | 0.24            | brain - r lobe of cerebellum          |

|       |                             |            |       |       |                                         |        |      |                                                 |
|-------|-----------------------------|------------|-------|-------|-----------------------------------------|--------|------|-------------------------------------------------|
| CAS-C | CAS-C-46                    | FFPE       | P     | P     | Agilent SureSelect Human All Exome V5   | 162.45 | 0.7  | excision of r back                              |
| CAS-C | CAS-C-ctDNA                 | Plasma     | ctDNA | ctDNA | Agilent SureSelect Human All Exome V5   | 159.51 | 0.64 | NA                                              |
| CAS-C | CAS-C-86                    | Buffy Coat | G     | NA    | Agilent SureSelect Human All Exome V5   | 204.77 | NA   | NA                                              |
| CAS-B | CAS-B-14B37035-1B           | FFPE       | RM    | RM1   | Agilent SureSelect Human All Exome V6   | 255.64 | 0.74 | L) superficial parotid gland plus nodes         |
| CAS-B | CAS-B-14B37035-1C           | FFPE       | RM    | RM2   | Agilent SureSelect Human All Exome V6   | 125    | 0.66 | L) superficial parotid gland plus nodes         |
| CAS-B | CAS-B-15B08317-3A           | FFPE       | RM    | RM3   | Agilent SureSelect Human All Exome V6   | 207.97 | 0.39 | Neck node Bx, malignant melanoma replacing a LN |
| CAS-B | CAS-B-21                    | FFPE       | DM    | DM2   | Agilent SureSelect Human All Exome V6   | 226.47 | 0.3  | left lung                                       |
| CAS-B | CAS-B-22                    | FF         | DM    | DM3   | Agilent SureSelect Human All Exome V6   | 145.16 | 0.57 | R lung                                          |
| CAS-B | CAS-B-24                    | FFPE       | DM    | DM1   | Agilent SureSelect Human All Exome V6   | 197.99 | 0.36 | R lobe liver                                    |
| CAS-B | CAS-B-37                    | FFPE       | DM    | DM4   | Agilent SureSelect Human All Exome V6   | 140.65 | 0.23 | brain-left frontal                              |
| CAS-B | CAS-B-42                    | FFPE       | DM    | DM5   | Agilent SureSelect Human All Exome V6   | 147.38 | 0.34 | brain-right caudate                             |
| CAS-B | CAS-B-Primary-1             | FFPE       | P     | P     | Agilent SureSelect Human All Exome V6   | 131.07 | 0.52 | L) frontal scalp excision - core 1              |
| CAS-B | CAS-B-ctDNA                 | Plasma     | ctDNA | ctDNA | Agilent SureSelect Human All Exome V6   | 289.75 | 0.32 | NA                                              |
| CAS-B | CAS-B-Normal                | Buffy Coat | G     | NA    | Agilent SureSelect Human All Exome V6   | 197.95 | NA   | NA                                              |
| CAS-F | CAS-F-107/FR07935913        | FF         | DM    | DM2   | TruSeq Nano DNA Library Prep Kit        | 55.5   | 0.42 | right liver                                     |
| CAS-F | CAS-F-113/FR07935915        | FF         | DM    | DM3   | TruSeq Nano DNA Library Prep Kit        | 56.85  | 0.47 | brain - Right temporal lobe                     |
| CAS-F | CAS-F-RS/FR07935922         | FF         | DM    | DM1   | TruSeq Nano DNA Library Prep Kit        | 76.55  | 0.3  | right Scapula                                   |
| CAS-F | CAS-F-T12-1/FR07935903      | FFPE       | RM    | RM2   | TruSeq Nano DNA Library Prep Kit        | 77.93  | 0.58 | back - In-transit metastasis - core1            |
| CAS-F | CAS-F-T12-2/FR07935909      | FFPE       | RM    | RM1   | TruSeq Nano DNA Library Prep Kit        | 39.78  | 0.44 | back - In-transit metastasis - slide            |
| CAS-F | CAS-F-T12-3/FR07935904      | FFPE       | RM    | RM3   | TruSeq Nano DNA Library Prep Kit        | 53.83  | 0.69 | back - In-transit metastasis - core3            |
| CAS-F | CAS-F-Normal/FR07935920     | Buffy Coat | G     | NA    | TruSeq Nano DNA Library Prep Kit        | 27.07  | NA   | NA                                              |
| CAS-A | CAS-A-13/FR07935916         | FF         | DM    | DM2   | TruSeq Nano DNA Library Prep Kit        | 63.43  | 0.88 | spleen                                          |
| CAS-A | CAS-A-1403318B-1/FR07935906 | FFPE       | RM    | RM2   | TruSeq Nano DNA Library Prep Kit        | 70.64  | 0.37 | L) inguinal lymphadectomy - core1               |
| CAS-A | CAS-A-1403318B-2/FR07935907 | FFPE       | RM    | RM1   | TruSeq Nano DNA Library Prep Kit        | 76.12  | 0.27 | L) inguinal lymphadectomy - core2               |
| CAS-A | CAS-A-1403318B-4/FR07935908 | FFPE       | RM    | RM3   | TruSeq Nano DNA Library Prep Kit        | 74.19  | 0.52 | L) inguinal lymphadectomy - core4               |
| CAS-A | CAS-A-16/FR07935894         | FF         | DM    | DM3   | TruSeq Nano DNA Library Prep Kit        | 69.28  | 0.43 | liver-right lobe                                |
| CAS-A | CAS-A-20/FR07935918         | FF         | DM    | DM4   | TruSeq Nano DNA Library Prep Kit        | 71.91  | 0.94 | heart-atrium                                    |
| CAS-A | CAS-A-9/FR07935905          | FF         | DM    | DM1   | TruSeq Nano DNA Library Prep Kit        | 80.81  | 0.48 | right kidney                                    |
| CAS-A | CAS-A-Normal/FR07935921     | Buffy Coat | G     | NA    | TruSeq Nano DNA Library Prep Kit        | 40.08  | NA   | NA                                              |
| CAS-D | CAS-D-Normal/FR07935923     | Buffy Coat | G     | NA    | TruSeq Nano DNA Library Prep Kit        | 38.87  | NA   | NA                                              |
| CAS-D | CAS-D-ctDNA/FR07935886      | ctDNA      | ctDNA | ctDNA | TruSeq Nano DNA HT Sample Prep Kit (V1) | 84     | 0.49 | NA                                              |
| CAS-D | CAS-D-64/FR07935878         | FF         | DM    | DM2   | TruSeq Nano DNA HT Sample Prep Kit (V1) | 64.75  | 0.48 | Liver Right lobe                                |
| CAS-D | CAS-D-65/FR07935879         | FF         | DM    | DM3   | TruSeq Nano DNA HT Sample Prep Kit (V1) | 70.62  | 0.8  | Liver central                                   |
| CAS-D | CAS-D-66/FR07935880         | FF         | DM    | DM4   | TruSeq Nano DNA HT Sample Prep Kit (V1) | 72.02  | 0.72 | Left Liver                                      |
| CAS-D | CAS-D-68/FR07935882         | FF         | DM    | DM5   | TruSeq Nano DNA HT Sample Prep Kit (V1) | 77.64  | 0.76 | brain - right hippocampus                       |
| CAS-D | CAS-D-70/FR07935883         | FF         | DM    | DM6   | TruSeq Nano DNA HT Sample Prep Kit (V1) | 76.58  | 0.73 | brain - left parietal                           |

**Supplementary Table 2. Tumour sample information for the 6 external cohort patients.**

| Case  | Sample     | Type | Figure ID | Organ                                     |
|-------|------------|------|-----------|-------------------------------------------|
| ETH-J | J-E1       | RM   | RM        | Axilla left                               |
| ETH-J | J-L1       | DM   | DM1       | Liver                                     |
| ETH-J | J-L2       | DM   | DM2       | Heart                                     |
| ETH-J | J-L3       | DM   | DM3       | Mediastinal lymph node                    |
| ETH-J | J-P1       | P    | P2        | Cutaneous, scapula left                   |
| ETH-J | J-P2       | P    | P1        | Cutaneous, scapula left                   |
| ETH-E | E-E1       | RM   | RM        | Lumbar left                               |
| ETH-E | E-L1       | DM   | DM1       | Peritoneum                                |
| ETH-E | E-L3       | DM   | DM2       | Testis                                    |
| ETH-E | E-L4       | DM   | DM3       | Spleen                                    |
| ETH-E | E-P        | P    | P         | Cutaneous                                 |
| ETH-F | F-L1       | DM   | DM1       | Axilla lymph node                         |
| ETH-F | F-L2       | DM   | DM2       | Subcutaneous shoulder right               |
| ETH-F | F-L3       | DM   | DM5       | Dermal flank                              |
| ETH-F | F-L4       | DM   | DM3       | Liver                                     |
| ETH-F | F-L5       | DM   | DM4       | Lung                                      |
| ETH-F | F-P1       | P    | P1        | Cutaneous                                 |
| ETH-F | F-P2       | P    | P2        | Cutaneous                                 |
| ETH-F | F-P4       | P    | P3        | Cutaneous                                 |
| MI-F  | SRR2159457 | DM   | DM        | Distant skin metastasis back              |
| MI-F  | SRR2159458 | RM   | RM1       | Locoregional metastasis left ear          |
| MI-F  | SRR2159459 | RM   | RM2       | Lymph node metastasis left cervical node  |
| MI-F  | SRR2159461 | P    | P         | Primary left ear                          |
| SK-G  | SRR2159462 | RM   | RM        | Locoregional skin metastasis axilla       |
| SK-G  | SRR2159463 | DM   | DM        | Lung metastasis                           |
| SK-G  | SRR2159465 | P    | P         | Primary right forearm                     |
| SK-H  | SRR2159466 | DM   | DM        | Brain metastasis                          |
| SK-H  | SRR2159467 | RM   | RM1       | Locoregional skin metastasis right leg    |
| SK-H  | SRR2159468 | RM   | RM2       | Lymph node metastasis right inguinal node |
| SK-H  | SRR2159470 | P    | P         | Primary right leg                         |

**Supplementary Table 3. Mutations validated by targeted amplicon sequencing.** LC: Low Confidence. HC: High Confidence. TP: True Positive. TN: True Negative. FP: False Positive. FN: False Negative.

| Patient | Confidence | Sample | Gene   | Mutation         | Result                     | Result Type | Predicted VAF | Observed VAF (duplicate) |
|---------|------------|--------|--------|------------------|----------------------------|-------------|---------------|--------------------------|
| CAS-G   | LC         | DM2    | ANAPC1 | 2;112625662;G;A  | VAL                        | FN          | 0.38          | 0.0806 0.0758            |
| CAS-G   | LC         | DM4    | ANAPC1 | 2;112625662;G;A  | VAL                        | FN          | 0.3           | 0.0736 0.0786            |
| CAS-G   | LC         | DM1    | ANAPC1 | 2;112625662;G;A  | VAL                        | FN          | 0.47          | 0.0765 0.0864            |
| CAS-G   | LC         | DM5    | ANAPC1 | 2;112625662;G;A  | VAL                        | FN          | 0.54          | 0.0886 0.0835            |
| CAS-G   | LC         | DM3    | ANAPC1 | 2;112625662;G;A  | VAL                        | FN          | 0.31          | 0.0873 0.0947            |
| CAS-G   | LC         | P      | ANAPC1 | 2;112625662;G;A  | NOT_PREDICTED_OBSERVED     | FN          | 0             | 0.0773 0.1066            |
| CAS-G   | LC         | RM     | ANAPC1 | 2;112625662;G;A  | NOT_PREDICTED_OBSERVED     | FN          | 0             | 0.0998 0.1016            |
| CAS-G   | HC         | DM2    | CUL4B  | X;119678398;T;A  | VAL                        | TP          | 0.24          | 0.1308 0.1294            |
| CAS-G   | HC         | DM3    | CUL4B  | X;119678398;T;A  | NOT_PREDICTED_NOT_OBSERVED | TN          | 0             | 0 0                      |
| CAS-G   | HC         | DM4    | CUL4B  | X;119678398;T;A  | NOT_PREDICTED_NOT_OBSERVED | TN          | 0             | 0 0                      |
| CAS-G   | HC         | DM1    | CUL4B  | X;119678398;T;A  | NOT_PREDICTED_NOT_OBSERVED | TN          | 0             | 0 0                      |
| CAS-G   | HC         | DM5    | CUL4B  | X;119678398;T;A  | NOT_PREDICTED_NOT_OBSERVED | TN          | 0             | 0 0                      |
| CAS-G   | HC         | P      | CUL4B  | X;119678398;T;A  | NOT_PREDICTED_NOT_OBSERVED | TN          | 0             | 0 0                      |
| CAS-G   | HC         | RM     | CUL4B  | X;119678398;T;A  | NOT_PREDICTED_NOT_OBSERVED | TN          | 0             | 0 0                      |
| CAS-G   | LC         | DM5    | DYNLL1 | 12;120934240;G;A | NOT_VAL                    | TN          | 0.01          | 0 0                      |
| CAS-G   | LC         | DM2    | DYNLL1 | 12;120934240;G;A | NOT_VAL                    | TN          | 0             | 0 0                      |
| CAS-G   | LC         | DM3    | DYNLL1 | 12;120934240;G;A | NOT_PREDICTED_NOT_OBSERVED | TN          | 0             | 0 0                      |
| CAS-G   | LC         | DM4    | DYNLL1 | 12;120934240;G;A | NOT_PREDICTED_NOT_OBSERVED | TN          | 0             | 0 0                      |
| CAS-G   | LC         | DM1    | DYNLL1 | 12;120934240;G;A | NOT_PREDICTED_NOT_OBSERVED | TN          | 0             | 0 0                      |
| CAS-G   | LC         | P      | DYNLL1 | 12;120934240;G;A | NOT_PREDICTED_NOT_OBSERVED | TN          | 0             | 0 0                      |
| CAS-G   | LC         | RM     | DYNLL1 | 12;120934240;G;A | NOT_PREDICTED_NOT_OBSERVED | TN          | 0             | 0 0                      |
| CAS-G   | LC         | P      | E2F5   | 8;86126052;C;A   | NOT_VAL                    | TN          | 0.12          | 0 0                      |
| CAS-G   | LC         | DM3    | E2F5   | 8;86126052;C;A   | NOT_PREDICTED_NOT_OBSERVED | TN          | 0             | 0 0                      |
| CAS-G   | LC         | DM4    | E2F5   | 8;86126052;C;A   | NOT_PREDICTED_NOT_OBSERVED | TN          | 0             | 0 0                      |
| CAS-G   | LC         | DM1    | E2F5   | 8;86126052;C;A   | NOT_PREDICTED_NOT_OBSERVED | TN          | 0             | 0 0                      |
| CAS-G   | LC         | DM2    | E2F5   | 8;86126052;C;A   | NOT_PREDICTED_NOT_OBSERVED | TN          | 0             | 0 0                      |
| CAS-G   | LC         | DM5    | E2F5   | 8;86126052;C;A   | NOT_PREDICTED_NOT_OBSERVED | TN          | 0             | 0 0                      |
| CAS-G   | LC         | RM     | E2F5   | 8;86126052;C;A   | NOT_PREDICTED_NOT_OBSERVED | TN          | 0             | 0 0                      |
| CAS-G   | HC         | DM2    | INO80  | 15;41337161;G;A  | VAL                        | TP          | 0.77          | 0.7742 0.553             |
| CAS-G   | HC         | DM4    | INO80  | 15;41337161;G;A  | VAL                        | TP          | 0.23          | 0.277 0.274              |
| CAS-G   | HC         | P      | INO80  | 15;41337161;G;A  | VAL                        | TP          | 0.22          | 0.374 0.3956             |
| CAS-G   | HC         | RM     | INO80  | 15;41337161;G;A  | VAL                        | TP          | 0.36          | 0.4137 0.4083            |
| CAS-G   | HC         | DM3    | INO80  | 15;41337161;G;A  | VAL                        | TP          | 0.21          | 0.2914 0.3               |
| CAS-G   | HC         | DM5    | INO80  | 15;41337161;G;A  | VAL                        | TP          | 0.24          | 0.278 0.2661             |
| CAS-G   | HC         | DM1    | INO80  | 15;41337161;G;A  | VAL                        | TP          | 0.04          | 0.0343                   |
| CAS-G   | HC         | DM4    | MLH1   | 3;37089083;G;A   | VAL                        | TP          | 0.05          | 0.0531 0.0628            |
| CAS-G   | HC         | DM3    | MLH1   | 3;37089083;G;A   | NOT_PREDICTED_NOT_OBSERVED | TN          | 0             | 0 0                      |

|       |    |     |        |                 |                            |    |      |               |
|-------|----|-----|--------|-----------------|----------------------------|----|------|---------------|
| CAS-G | HC | DM1 | MLH1   | 3;37089083;G;A  | NOT_PREDICTED_NOT_OBSERVED | TN | 0    | 0.0           |
| CAS-G | HC | DM2 | MLH1   | 3;37089083;G;A  | NOT_PREDICTED_NOT_OBSERVED | TN | 0    | 0.0           |
| CAS-G | HC | DM5 | MLH1   | 3;37089083;G;A  | NOT_PREDICTED_NOT_OBSERVED | TN | 0    | 0.0           |
| CAS-G | HC | P   | MLH1   | 3;37089083;G;A  | NOT_PREDICTED_NOT_OBSERVED | TN | 0    | 0.0           |
| CAS-G | HC | RM  | MLH1   | 3;37089083;G;A  | NOT_PREDICTED_NOT_OBSERVED | TN | 0    | 0.0           |
| CAS-G | HC | DM4 | MSH6   | 2;48018128;G;A  | VAL                        | TP | 0.05 | 0.0308        |
| CAS-G | HC | DM5 | MSH6   | 2;48027175;G;A  | VAL                        | TP | 0.21 | 0.1938 0.1988 |
| CAS-G | HC | DM4 | MSH6   | 2;48033352;C;T  | VAL                        | TP | 0.11 | 0.1785 0.1821 |
| CAS-G | HC | DM3 | MSH6   | 2;48033352;C;T  | VAL                        | TP | 0.13 | 0.1458 0.1614 |
| CAS-G | HC | DM1 | MSH6   | 2;48033352;C;T  | VAL                        | TP | 0.1  | 0.2723 0.0431 |
| CAS-G | HC | DM5 | MSH6   | 2;48033791;G;A  | VAL                        | TP | 0.12 | 0.2172 0.2238 |
| CAS-G | HC | DM3 | MSH6   | 2;48018128;G;A  | NOT_PREDICTED_NOT_OBSERVED | TN | 0    | 0.0           |
| CAS-G | HC | DM3 | MSH6   | 2;48027175;G;A  | NOT_PREDICTED_NOT_OBSERVED | TN | 0    | 0.0           |
| CAS-G | HC | DM3 | MSH6   | 2;48033791;G;A  | NOT_PREDICTED_NOT_OBSERVED | TN | 0    | 0.0           |
| CAS-G | HC | DM4 | MSH6   | 2;48027175;G;A  | NOT_PREDICTED_NOT_OBSERVED | TN | 0    | 0.0           |
| CAS-G | HC | DM4 | MSH6   | 2;48033791;G;A  | NOT_PREDICTED_NOT_OBSERVED | TN | 0    | 0.0           |
| CAS-G | HC | DM1 | MSH6   | 2;48018128;G;A  | NOT_PREDICTED_NOT_OBSERVED | TN | 0    | 0.0           |
| CAS-G | HC | DM1 | MSH6   | 2;48027175;G;A  | NOT_PREDICTED_NOT_OBSERVED | TN | 0    | 0.0           |
| CAS-G | HC | DM1 | MSH6   | 2;48033791;G;A  | NOT_PREDICTED_NOT_OBSERVED | TN | 0    | 0.0           |
| CAS-G | HC | DM2 | MSH6   | 2;48018128;G;A  | NOT_PREDICTED_NOT_OBSERVED | TN | 0    | 0.0           |
| CAS-G | HC | DM2 | MSH6   | 2;48027175;G;A  | NOT_PREDICTED_NOT_OBSERVED | TN | 0    | 0.0           |
| CAS-G | HC | DM2 | MSH6   | 2;48033352;C;T  | NOT_PREDICTED_NOT_OBSERVED | TN | 0    | 0.0           |
| CAS-G | HC | DM2 | MSH6   | 2;48033791;G;A  | NOT_PREDICTED_NOT_OBSERVED | TN | 0    | 0.0           |
| CAS-G | HC | DM5 | MSH6   | 2;48018128;G;A  | NOT_PREDICTED_NOT_OBSERVED | TN | 0    | 0.0           |
| CAS-G | HC | DM5 | MSH6   | 2;48033352;C;T  | NOT_PREDICTED_NOT_OBSERVED | TN | 0    | 0.0           |
| CAS-G | HC | P   | MSH6   | 2;48018128;G;A  | NOT_PREDICTED_NOT_OBSERVED | TN | 0    | 0.0           |
| CAS-G | HC | P   | MSH6   | 2;48027175;G;A  | NOT_PREDICTED_NOT_OBSERVED | TN | 0    | 0.0           |
| CAS-G | HC | P   | MSH6   | 2;48033352;C;T  | NOT_PREDICTED_NOT_OBSERVED | TN | 0    | 0.0           |
| CAS-G | HC | P   | MSH6   | 2;48033791;G;A  | NOT_PREDICTED_NOT_OBSERVED | TN | 0    | 0.0           |
| CAS-G | HC | RM  | MSH6   | 2;48018128;G;A  | NOT_PREDICTED_NOT_OBSERVED | TN | 0    | 0.0           |
| CAS-G | HC | RM  | MSH6   | 2;48027175;G;A  | NOT_PREDICTED_NOT_OBSERVED | TN | 0    | 0.0           |
| CAS-G | HC | RM  | MSH6   | 2;48033352;C;T  | NOT_PREDICTED_NOT_OBSERVED | TN | 0    | 0.0           |
| CAS-G | HC | RM  | MSH6   | 2;48033791;G;A  | NOT_PREDICTED_NOT_OBSERVED | TN | 0    | 0.0           |
| CAS-G | HC | DM2 | POLR2A | 17;7404625;G;A  | VAL                        | TP | 0.55 | 0.4433 0.4621 |
| CAS-G | HC | RM  | POLR2A | 17;7404625;G;A  | VAL                        | TP | 0.43 | 0.4145 0.4203 |
| CAS-G | HC | DM3 | POLR2A | 17;7404625;G;A  | VAL                        | TP | 0.38 | 0.459 0.4521  |
| CAS-G | HC | P   | POLR2A | 17;7404625;G;A  | VAL                        | TP | 0.47 | 0.3776 0.3685 |
| CAS-G | HC | DM5 | POLR2A | 17;7404625;G;A  | VAL                        | TP | 0.56 | 0.5889 0.5813 |
| CAS-G | HC | DM4 | POLR2A | 17;7404625;G;A  | VAL                        | TP | 0.44 | 0.455 0.4497  |
| CAS-G | HC | DM1 | POLR2A | 17;7404625;G;A  | VAL                        | TP | 0.42 | 0.4682 0.4415 |
| CAS-G | LC | P   | PRKCB  | 16;24185900;C;T | NOT_VAL                    | TN | 0    | 0.0           |
| CAS-G | LC | DM3 | PRKCB  | 16;24185900;C;T | NOT_PREDICTED_NOT_OBSERVED | TN | 0    | 0.0           |
| CAS-G | LC | DM4 | PRKCB  | 16;24185900;C;T | NOT_PREDICTED_NOT_OBSERVED | TN | 0    | 0.0           |

|       |    |     |         |                  |                            |    |      |                          |
|-------|----|-----|---------|------------------|----------------------------|----|------|--------------------------|
| CAS-G | LC | DM1 | PRKCB   | 16;24185900;C;T  | NOT_PREDICTED_NOT_OBSERVED | TN | 0    | 0.0                      |
| CAS-G | LC | DM2 | PRKCB   | 16;24185900;C;T  | NOT_PREDICTED_NOT_OBSERVED | TN | 0    | 0.0                      |
| CAS-G | LC | DM5 | PRKCB   | 16;24185900;C;T  | NOT_PREDICTED_NOT_OBSERVED | TN | 0    | 0.0                      |
| CAS-G | LC | RM  | PRKCB   | 16;24185900;C;T  | NOT_PREDICTED_NOT_OBSERVED | TN | 0    | 0.0                      |
| CAS-G | LC | DM2 | RHNO1   | 12;2996279;T;C   | VAL                        | FN | 0.06 | 0.26603325<br>0.25462013 |
| CAS-G | LC | P   | RHNO1   | 12;2996279;T;C   | VAL                        | FN | 0.33 | 0.21978022<br>0.25714285 |
| CAS-G | LC | DM3 | RHNO1   | 12;2996279;T;C   | NOT_PREDICTED_OBSERVED     | FN | 0    | 0.18574514<br>0.18656717 |
| CAS-G | LC | DM4 | RHNO1   | 12;2996279;T;C   | NOT_PREDICTED_OBSERVED     | FN | 0    | 0.10558069<br>0.13237222 |
| CAS-G | LC | DM1 | RHNO1   | 12;2996279;T;C   | NOT_PREDICTED_OBSERVED     | FN | 0    | 0.24878048<br>0.1908832  |
| CAS-G | LC | DM5 | RHNO1   | 12;2996279;T;C   | NOT_PREDICTED_OBSERVED     | FN | 0    | 0.16303101<br>0.1644005  |
| CAS-G | LC | RM  | RHNO1   | 12;2996279;T;C   | NOT_PREDICTED_OBSERVED     | FN | 0    | 0.16228748<br>0.17154255 |
| CAS-G | LC | DM4 | TOPBP1  | 3;133374283;G;A  | VAL                        | FN | 0.1  | 0.067 0.0691             |
| CAS-G | LC | DM1 | TOPBP1  | 3;133374283;G;A  | NOT_VAL                    | TN | 0.01 | 0.0                      |
| CAS-G | LC | DM3 | TOPBP1  | 3;133374283;G;A  | NOT_PREDICTED_NOT_OBSERVED | TN | 0    | 0.0                      |
| CAS-G | LC | DM2 | TOPBP1  | 3;133374283;G;A  | NOT_PREDICTED_NOT_OBSERVED | TN | 0    | 0.0                      |
| CAS-G | LC | DM5 | TOPBP1  | 3;133374283;G;A  | NOT_PREDICTED_NOT_OBSERVED | TN | 0    | 0.0                      |
| CAS-G | LC | P   | TOPBP1  | 3;133374283;G;A  | NOT_PREDICTED_NOT_OBSERVED | TN | 0    | 0.0                      |
| CAS-G | LC | RM  | TOPBP1  | 3;133374283;G;A  | NOT_PREDICTED_NOT_OBSERVED | TN | 0    | 0.0                      |
| CAS-G | HC | DM2 | UBE2T   | 1;202302637;G;A  | VAL                        | TP | 0.5  | 0.4164 0.4314            |
| CAS-G | HC | RM  | UBE2T   | 1;202302637;G;A  | VAL                        | TP | 0.35 | 0.4144 0.4026            |
| CAS-G | HC | DM5 | UBE2T   | 1;202302637;G;A  | VAL                        | TP | 0.4  | 0.4681 0.4681            |
| CAS-G | HC | DM4 | UBE2T   | 1;202302637;G;A  | VAL                        | TP | 0.3  | 0.4349 0.4459            |
| CAS-G | HC | P   | UBE2T   | 1;202302637;G;A  | VAL                        | TP | 0.39 | 0.3424 0.3766            |
| CAS-G | HC | DM1 | UBE2T   | 1;202302637;G;A  | VAL                        | TP | 0.39 | 0.4294 0.4349            |
| CAS-G | HC | DM3 | UBE2T   | 1;202302637;G;A  | VAL                        | TP | 0.37 | 0.4599 0.4638            |
| CAS-D | LC | DM4 | ANKLE2  | 12;133310637;T;C | NOT_VAL                    | TN | 0.01 | 0.0                      |
| CAS-D | LC | DM2 | ANKLE2  | 12;133310637;T;C | VAL                        | FN | 0.02 | 0.05472637               |
| CAS-D | LC | P2  | ANKLE2  | 12;133310637;T;C | NOT_PREDICTED_NOT_OBSERVED | TN | 0    | 0.0                      |
| CAS-D | LC | P3  | ANKLE2  | 12;133310637;T;C | NOT_PREDICTED_NOT_OBSERVED | TN | 0    | 0.0                      |
| CAS-D | LC | DM5 | ANKLE2  | 12;133310637;T;C | NOT_PREDICTED_NOT_OBSERVED | TN | 0    | 0.0                      |
| CAS-D | LC | RM  | ANKLE2  | 12;133310637;T;C | NOT_PREDICTED_NOT_OBSERVED | TN | 0    | 0.0                      |
| CAS-D | LC | DM6 | ANKLE2  | 12;133310637;T;C | NOT_PREDICTED_OBSERVED     | FN | 0    | 0.06374502               |
| CAS-D | HC | DM5 | CLTC    | 17;57760301;C;T  | VAL                        | TP | 0.77 | 0.7215 0.741             |
| CAS-D | HC | DM4 | CLTC    | 17;57760301;C;T  | VAL                        | TP | 0.66 | 0.7034 0.7038            |
| CAS-D | HC | DM6 | CLTC    | 17;57760301;C;T  | VAL                        | TP | 0.73 | 0.7193 0.7147            |
| CAS-D | HC | DM2 | CLTC    | 17;57760301;C;T  | VAL                        | TP | 0.46 | 0.4874 0.488             |
| CAS-D | HC | P3  | CLTC    | 17;57760301;C;T  | VAL                        | TP | 0.2  | 0.2044 0.2254            |
| CAS-D | HC | P2  | CLTC    | 17;57760301;C;T  | VAL                        | TP | 0.45 | 0.5438 0.554             |
| CAS-D | HC | RM  | CLTC    | 17;57760301;C;T  | VAL                        | TP | 0.7  | 0.6918 0.7443            |
| CAS-D | HC | DM6 | FGFR1OP | 6;167417807;C;CA | VAL                        | TP | 0.33 | 0.4209 0.436             |
| CAS-D | HC | DM2 | FGFR1OP | 6;167417807;C;CA | VAL                        | TP | 0.27 | 0.3465 0.3441            |
| CAS-D | HC | DM5 | FGFR1OP | 6;167417807;C;CA | VAL                        | TP | 0.39 | 0.4597 0.4525            |
| CAS-D | HC | P2  | FGFR1OP | 6;167417807;C;CA | VAL                        | TP | 0.3  | 0.3561 0.3337            |

|       |    |     |         |                                                           |                                |    |      |               |
|-------|----|-----|---------|-----------------------------------------------------------|--------------------------------|----|------|---------------|
| CAS-D | HC | P3  | FGFR1OP | 6;167417807;C;CA                                          | VAL                            | TP | 0.1  | 0.1941 0.1781 |
| CAS-D | HC | DM4 | FGFR1OP | 6;167417807;C;CA                                          | VAL                            | TP | 0.78 | 0.7226 0.7187 |
| CAS-D | HC | RM  | FGFR1OP | 6;167417807;C;CA                                          | VAL                            | TP | 0.5  | 0.4878 0.5227 |
| CAS-D | HC | DM5 | NUP155  | 5;37350306;G;A                                            | VAL                            | TP | 0.77 | 0.6948 0.7098 |
| CAS-D | HC | DM4 | NUP155  | 5;37350306;G;A                                            | VAL                            | TP | 0.67 | 0.6887 0.6853 |
| CAS-D | HC | DM6 | NUP155  | 5;37350306;G;A                                            | VAL                            | TP | 0.71 | 0.6979 0.6936 |
| CAS-D | HC | P2  | NUP155  | 5;37350306;G;A                                            | VAL                            | TP | 0.34 | 0.3565 0.3552 |
| CAS-D | HC | DM2 | NUP155  | 5;37350306;G;A                                            | VAL                            | TP | 0.52 | 0.4501 0.4442 |
| CAS-D | HC | P3  | NUP155  | 5;37350306;G;A                                            | VAL                            | TP | 0.12 | 0.1621 0.1538 |
| CAS-D | HC | RM  | NUP155  | 5;37350306;G;A                                            | VAL                            | TP | 0.74 | 0.7004 0.6965 |
| CAS-D | HC | DM2 | PSMB11  | 14;23511991;G;A                                           | VAL                            | TP | 0.26 | 0.2553 0.2699 |
| CAS-D | HC | DM5 | PSMB11  | 14;23511991;G;A                                           | VAL                            | TP | 0.27 | 0.2714 0.2797 |
| CAS-D | HC | DM6 | PSMB11  | 14;23511991;G;A                                           | VAL                            | TP | 0.25 | 0.3046 0.3019 |
| CAS-D | HC | DM4 | PSMB11  | 14;23511991;G;A                                           | VAL                            | TP | 0.25 | 0.2995 0.3035 |
| CAS-D | HC | RM  | PSMB11  | 14;23511991;G;A                                           | VAL                            | TP | 0.33 | 0.4509 0.4671 |
| CAS-D | HC | P3  | PSMB11  | 14;23511991;G;A                                           | VAL                            | TP | 0.15 | 0.1648 0.159  |
| CAS-D | HC | P2  | PSMB11  | 14;23511991;G;A                                           | VAL                            | TP | 0.31 | 0.3792 0.3773 |
| CAS-D | LC | DM2 | TACC3   | 4;1729764;ACAAAGCGGAGACTC<br>CGCACGGAGCCGAGGAAGAAT<br>G;A | NOT_VAL                        | TN | 0.17 | 0 0           |
| CAS-D | LC | P2  | TACC3   | 4;1729764;ACAAAGCGGAGACTC<br>CGCACGGAGCCGAGGAAGAAT<br>G;A | NOT_PREDICTED_NOT_OBSER<br>VED | TN | 0    | 0 0           |
| CAS-D | LC | P3  | TACC3   | 4;1729764;ACAAAGCGGAGACTC<br>CGCACGGAGCCGAGGAAGAAT<br>G;A | NOT_PREDICTED_NOT_OBSER<br>VED | TN | 0    | 0 0           |
| CAS-D | LC | DM4 | TACC3   | 4;1729764;ACAAAGCGGAGACTC<br>CGCACGGAGCCGAGGAAGAAT<br>G;A | NOT_PREDICTED_NOT_OBSER<br>VED | TN | 0    | 0 0           |
| CAS-D | LC | DM5 | TACC3   | 4;1729764;ACAAAGCGGAGACTC<br>CGCACGGAGCCGAGGAAGAAT<br>G;A | NOT_PREDICTED_NOT_OBSER<br>VED | TN | 0    | 0 0           |
| CAS-D | LC | DM6 | TACC3   | 4;1729764;ACAAAGCGGAGACTC<br>CGCACGGAGCCGAGGAAGAAT<br>G;A | NOT_PREDICTED_NOT_OBSER<br>VED | TN | 0    | 0 0           |
| CAS-D | LC | RM  | TACC3   | 4;1729764;ACAAAGCGGAGACTC<br>CGCACGGAGCCGAGGAAGAAT<br>G;A | NOT_PREDICTED_NOT_OBSER<br>VED | TN | 0    | 0 0           |
| CAS-D | HC | DM4 | TP53    | 17;7577539;G;A                                            | VAL                            | TP | 0.64 | 0.6723 0.677  |
| CAS-D | HC | DM2 | TP53    | 17;7577539;G;A                                            | VAL                            | TP | 0.21 | 0.361 0.3576  |
| CAS-D | HC | DM5 | TP53    | 17;7577539;G;A                                            | VAL                            | TP | 0.76 | 0.6759 0.6648 |
| CAS-D | HC | DM6 | TP53    | 17;7577539;G;A                                            | VAL                            | TP | 0.55 | 0.6852 0.671  |
| CAS-D | HC | P3  | TP53    | 17;7577539;G;A                                            | VAL                            | TP | 0.11 | 0.1922 0.1939 |
| CAS-D | HC | RM  | TP53    | 17;7577539;G;A                                            | VAL                            | TP | 0.65 | 0.7761 0.7381 |
| CAS-D | HC | P2  | TP53    | 17;7577539;G;A                                            | VAL                            | TP | 0.52 | 0.5394 0.5642 |
| CAS-D | LC | DM2 | UBC     | 12;125397821;G;A                                          | NOT_VAL                        | TN | 0.3  | 0 0           |
| CAS-D | LC | DM6 | UBC     | 12;125397821;G;A                                          | NOT_VAL                        | TN | 0.2  | 0 0           |
| CAS-D | LC | RM  | UBC     | 12;125397821;G;A                                          | NOT_VAL                        | TN | 0.22 | 0 0           |
| CAS-D | LC | P2  | UBC     | 12;125397821;G;A                                          | NOT_VAL                        | TN | 0.16 | 0 0           |
| CAS-D | LC | DM5 | UBC     | 12;125397821;G;A                                          | NOT_VAL                        | TN | 0.14 | 0 0           |
| CAS-D | LC | P3  | UBC     | 12;125397821;G;A                                          | NOT_VAL                        | TN | 0.18 | 0 0           |
| CAS-D | LC | DM4 | UBC     | 12;125397821;G;A                                          | NOT_VAL                        | TN | 0.33 | 0 0           |
| CAS-F | HC | DM2 | ALMS1   | 2;73717382;C;A                                            | VAL                            | TP | 0.3  | 0.2957 0.3144 |
| CAS-F | HC | RM1 | ALMS1   | 2;73717382;C;A                                            | VAL                            | TP | 0.32 | 0.3011 0.2786 |
| CAS-F | HC | RM2 | ALMS1   | 2;73717382;C;A                                            | VAL                            | TP | 0.33 | 0.393 0.377   |



|       |    |     |        |                 |                            |    |      |                   |
|-------|----|-----|--------|-----------------|----------------------------|----|------|-------------------|
| CAS-F | HC | RM3 | ALMS1  | 2;73717382;C;A  | VAL                        | TP | 0.39 | 0.4379 0.4261     |
| CAS-F | HC | DM1 | ALMS1  | 2;73717382;C;A  | VAL                        | TP | 0.14 | 0.2212 0.2395     |
| CAS-F | HC | DM3 | ALMS1  | 2;73717382;C;A  | VAL                        | TP | 0.3  | 0.3136 0.3157     |
| CAS-F | HC | RM3 | ANAPC1 | 2;112614429;G;A | VAL                        | TP | 0.05 | 0.1154 0.1248     |
| CAS-F | HC | RM2 | ANAPC1 | 2;112614429;G;A | VAL                        | TP | 0.11 | 0.106 0.1062      |
| CAS-F | HC | DM3 | ANAPC1 | 2;112614429;G;A | VAL                        | TP | 0.09 | 0.0499 0.0409     |
| CAS-F | HC | RM1 | ANAPC1 | 2;112614429;G;A | VAL                        | TP | 0.09 | 0.1756 0.1448     |
| CAS-F | HC | DM2 | ANAPC1 | 2;112614429;G;A | VAL                        | TP | 0.05 | 0.1155 0.1384     |
| CAS-F | HC | DM1 | ANAPC1 | 2;112614429;G;A | VAL                        | TP | 0.01 | 0.131 0.1199      |
| CAS-F | LC | RM3 | BRCA2  | 13;32970126;A;T | NOT_VAL                    | TN | 0.21 | 0 0               |
| CAS-F | LC | RM2 | BRCA2  | 13;32970126;A;T | NOT_PREDICTED_NOT_OBSERVED | TN | 0    | 0 0               |
| CAS-F | LC | RM1 | BRCA2  | 13;32970126;A;T | NOT_PREDICTED_NOT_OBSERVED | TN | 0    | 0 0               |
| CAS-F | LC | DM2 | BRCA2  | 13;32970126;A;T | NOT_PREDICTED_NOT_OBSERVED | TN | 0    | 0 0               |
| CAS-F | LC | DM3 | BRCA2  | 13;32970126;A;T | NOT_PREDICTED_NOT_OBSERVED | TN | 0    | 0 0               |
| CAS-F | LC | DM1 | BRCA2  | 13;32970126;A;T | NOT_PREDICTED_NOT_OBSERVED | TN | 0    | 0 0               |
| CAS-F | HC | DM2 | CDKN2A | 9;21971017;G;A  | VAL                        | TP | 0.48 | 0.4489 0.4232     |
| CAS-F | HC | RM2 | CDKN2A | 9;21971017;G;A  | VAL                        | TP | 0.64 | 0.854 0.8411      |
| CAS-F | HC | DM3 | CDKN2A | 9;21971017;G;A  | VAL                        | TP | 0.42 | 0.4818 0.4577     |
| CAS-F | HC | RM3 | CDKN2A | 9;21971017;G;A  | VAL                        | TP | 0.92 | 0.8928 0.8667     |
| CAS-F | HC | RM1 | CDKN2A | 9;21971017;G;A  | VAL                        | TP | 0.59 | 0.5092 0.3659     |
| CAS-F | HC | DM1 | CDKN2A | 9;21971017;G;A  | VAL                        | TP | 0.4  | 0.3806 0.4229     |
| CAS-F | LC | RM3 | ENSA   | 1;150573651;A;G | NOT_VAL                    | TN | 0.06 | 0 0               |
| CAS-F | LC | RM2 | ENSA   | 1;150573651;A;G | NOT_VAL                    | TN | 0.09 | 0 0               |
| CAS-F | LC | RM1 | ENSA   | 1;150573651;A;G | NOT_PREDICTED_NOT_OBSERVED | TN | 0    | 0 0               |
| CAS-F | LC | DM2 | ENSA   | 1;150573651;A;G | NOT_PREDICTED_NOT_OBSERVED | TN | 0    | 0 0               |
| CAS-F | LC | DM3 | ENSA   | 1;150573651;A;G | NOT_PREDICTED_NOT_OBSERVED | TN | 0    | 0 0               |
| CAS-F | LC | DM1 | ENSA   | 1;150573651;A;G | NOT_PREDICTED_NOT_OBSERVED | TN | 0    | 0 0               |
| CAS-F | HC | RM3 | FEN1   | 11;61563864;T;G | VAL                        | TP | 0.62 | 0.6474 0.6054     |
| CAS-F | HC | RM2 | FEN1   | 11;61563864;T;G | VAL                        | TP | 0.52 | 0.564 0.5383      |
| CAS-F | HC | DM1 | FEN1   | 11;61563864;T;G | VAL                        | TP | 0.39 | 0.3835 0.404      |
| CAS-F | HC | DM2 | FEN1   | 11;61563864;T;G | VAL                        | TP | 0.55 | 0.4862 0.4707     |
| CAS-F | HC | RM1 | FEN1   | 11;61563864;T;G | VAL                        | TP | 0.5  | 0.3889 0.41573032 |
| CAS-F | HC | DM3 | FEN1   | 11;61563864;T;G | VAL                        | TP | 0.37 | 0.4704 0.4769     |
| CAS-F | HC | RM2 | KIF2B  | 17;51900950;G;A | VAL                        | TP | 0.5  | 0.4558 0.4615     |
| CAS-F | HC | DM3 | KIF2B  | 17;51900950;G;A | VAL                        | TP | 0.21 | 0.1854 0.1843     |
| CAS-F | HC | RM3 | KIF2B  | 17;51900950;G;A | VAL                        | TP | 0.47 | 0.5191 0.5249     |
| CAS-F | HC | RM1 | KIF2B  | 17;51900950;G;A | VAL                        | TP | 0.34 | 0.3351 0.3499     |
| CAS-F | HC | DM2 | KIF2B  | 17;51900950;G;A | VAL                        | TP | 0.28 | 0.3531 0.3312     |
| CAS-F | HC | DM1 | KIF2B  | 17;51900950;G;A | VAL                        | TP | 0.32 | 0.2602 0.2672     |
| CAS-F | HC | RM2 | MDC1   | 6;30672477;C;T  | VAL                        | TP | 0.23 | 0.2654 0.2875     |
| CAS-F | HC | RM3 | MDC1   | 6;30672477;C;T  | VAL                        | TP | 0.24 | 0.3115 0.2962     |
| CAS-F | HC | DM2 | MDC1   | 6;30672477;C;T  | VAL                        | TP | 0.22 | 0.176 0.1753      |
| CAS-F | HC | DM3 | MDC1   | 6;30672477;C;T  | VAL                        | TP | 0.42 | 0.3971 0.4099     |

|       |    |     |        |                  |                            |    |      |               |
|-------|----|-----|--------|------------------|----------------------------|----|------|---------------|
| CAS-F | HC | DM1 | MDC1   | 6;30672477;C;T   | VAL                        | TP | 0.16 | 0.1132 0.1407 |
| CAS-F | HC | RM1 | MDC1   | 6;30672477;C;T   | VAL                        | TP | 0.12 | 0.1362 0.1357 |
| CAS-F | HC | DM2 | MYO10  | 5;16701934;C;A   | VAL                        | TP | 0.4  | 0.4024 0.4185 |
| CAS-F | HC | RM3 | MYO10  | 5;16701934;C;A   | VAL                        | TP | 0.57 | 0.4915 0.4922 |
| CAS-F | HC | DM3 | MYO10  | 5;16701934;C;A   | VAL                        | TP | 0.11 | 0.2183 0.2216 |
| CAS-F | HC | RM2 | MYO10  | 5;16701934;C;A   | VAL                        | TP | 0.41 | 0.4777 0.4615 |
| CAS-F | HC | DM1 | MYO10  | 5;16701934;C;A   | VAL                        | TP | 0.26 | 0.3346 0.3419 |
| CAS-F | HC | RM1 | MYO10  | 5;16701934;C;A   | VAL                        | TP | 0.45 | 0.3345 0.3494 |
| CAS-F | HC | RM2 | NFRKB  | 11;129743677;A;G | VAL                        | TP | 0.07 | 0.1261 0.1079 |
| CAS-F | HC | RM3 | NFRKB  | 11;129743677;A;G | VAL                        | TP | 0.24 | 0.1748 0.1848 |
| CAS-F | HC | RM1 | NFRKB  | 11;129743677;A;G | VAL                        | TP | 0.07 | 0.1424 0.0985 |
| CAS-F | HC | DM2 | NFRKB  | 11;129743677;A;G | NOT_PREDICTED_NOT_OBSERVED | TN | 0    | 0 0           |
| CAS-F | HC | DM3 | NFRKB  | 11;129743677;A;G | NOT_PREDICTED_NOT_OBSERVED | TN | 0    | 0 0           |
| CAS-F | HC | DM1 | NFRKB  | 11;129743677;A;G | NOT_PREDICTED_NOT_OBSERVED | TN | 0    | 0 0           |
| CAS-F | HC | DM1 | POLR2A | 17;7404163;C;T   | VAL                        | TP | 0.05 | 0.15 0.1469   |
| CAS-F | HC | DM3 | POLR2A | 17;7404163;C;T   | VAL                        | TP | 0.41 | 0.3803 0.3862 |
| CAS-F | HC | RM1 | POLR2A | 17;7404163;C;T   | VAL                        | TP | 0.08 | 0.2205 0.2213 |
| CAS-F | HC | RM3 | POLR2A | 17;7404163;C;T   | VAL                        | TP | 0.3  | 0.2955 0.3192 |
| CAS-F | HC | RM2 | POLR2A | 17;7404163;C;T   | VAL                        | TP | 0.3  | 0.262 0.2605  |
| CAS-F | HC | DM2 | POLR2A | 17;7404163;C;T   | VAL                        | TP | 0.16 | 0.1917 0.1755 |
| CAS-F | HC | DM1 | POM121 | 7;72396963;C;T   | VAL                        | TP | 0.38 | 0.4594 0.4579 |
| CAS-F | HC | DM2 | POM121 | 7;72396963;C;T   | VAL                        | TP | 0.59 | 0.4966 0.5031 |
| CAS-F | HC | RM2 | POM121 | 7;72396963;C;T   | VAL                        | TP | 0.63 | 0.6417 0.5981 |
| CAS-F | HC | RM3 | POM121 | 7;72396963;C;T   | VAL                        | TP | 0.67 | 0.6646 0.6465 |
| CAS-F | HC | DM3 | POM121 | 7;72396963;C;T   | VAL                        | TP | 0.53 | 0.5842 0.5773 |
| CAS-F | HC | RM1 | POM121 | 7;72396963;C;T   | VAL                        | TP | 0.52 | 0.528 0.5187  |
| CAS-F | HC | RM2 | POM121 | 7;72396964;C;T   | VAL                        | TP | 0.63 | 0.645 0.6019  |
| CAS-F | HC | DM2 | POM121 | 7;72396964;C;T   | VAL                        | TP | 0.57 | 0.4968 0.5041 |
| CAS-F | HC | RM1 | POM121 | 7;72396964;C;T   | VAL                        | TP | 0.54 | 0.5315 0.5208 |
| CAS-F | HC | RM3 | POM121 | 7;72396964;C;T   | VAL                        | TP | 0.67 | 0.6625 0.6525 |
| CAS-F | HC | DM1 | POM121 | 7;72396964;C;T   | VAL                        | TP | 0.38 | 0.4602 0.4576 |
| CAS-F | HC | DM3 | POM121 | 7;72396964;C;T   | VAL                        | TP | 0.53 | 0.5863 0.5785 |
| CAS-F | HC | RM2 | RNF4   | 4;2515439;C;T    | VAL                        | TP | 0.57 | 0.4776 0.4851 |
| CAS-F | HC | RM3 | RNF4   | 4;2515439;C;T    | VAL                        | TP | 0.55 | 0.515 0.5017  |
| CAS-F | HC | RM1 | RNF4   | 4;2515439;C;T    | VAL                        | TP | 0.42 | 0.3497 0.3964 |
| CAS-F | HC | DM2 | RNF4   | 4;2515439;C;T    | VAL                        | TP | 0.36 | 0.378 0.391   |
| CAS-F | HC | DM1 | RNF4   | 4;2515439;C;T    | VAL                        | TP | 0.23 | 0.352 0.324   |
| CAS-F | HC | DM3 | RNF4   | 4;2515439;C;T    | VAL                        | TP | 0.23 | 0.3598 0.3625 |
| CAS-F | LC | RM3 | SMUG1  | 12;54582294;C;G  | NOT_VAL                    | TN | 0.07 | 0 0           |
| CAS-F | LC | RM2 | SMUG1  | 12;54582294;C;G  | NOT_VAL                    | TN | 0.01 | 0 0           |
| CAS-F | LC | RM1 | SMUG1  | 12;54582294;C;G  | NOT_PREDICTED_NOT_OBSERVED | TN | 0    | 0 0           |
| CAS-F | LC | DM2 | SMUG1  | 12;54582294;C;G  | NOT_PREDICTED_NOT_OBSERVED | TN | 0    | 0 0           |
| CAS-F | LC | DM3 | SMUG1  | 12;54582294;C;G  | NOT_PREDICTED_NOT_OBSERVED | TN | 0    | 0 0           |

|       |    |     |        |                                |                            |    |      |                      |
|-------|----|-----|--------|--------------------------------|----------------------------|----|------|----------------------|
| CAS-F | LC | DM1 | SMUG1  | 12;54582294;C;G                | NOT_PREDICTED_NOT_OBSERVED | TN | 0    | 0 0                  |
| CAS-F | LC | RM2 | TUBB4A | 19;6496379;A;G                 | VAL                        | FN | 0.1  | 0.0935 0.1078        |
| CAS-F | LC | RM3 | TUBB4A | 19;6496379;A;G                 | NOT_PREDICTED_OBSERVED     | FN | 0    | 0.0888 0.0742        |
| CAS-F | LC | RM1 | TUBB4A | 19;6496379;A;G                 | NOT_PREDICTED_OBSERVED     | FN | 0    | 0.044                |
| CAS-F | LC | DM2 | TUBB4A | 19;6496379;A;G                 | NOT_PREDICTED_OBSERVED     | FN | 0    | 0.1031 0.1029        |
| CAS-F | LC | DM3 | TUBB4A | 19;6496379;A;G                 | NOT_PREDICTED_OBSERVED     | FN | 0    | 0.0929 0.1141        |
| CAS-F | LC | DM1 | TUBB4A | 19;6496379;A;G                 | NOT_PREDICTED_OBSERVED     | FN | 0    | 0.0322<br>0.03084416 |
| CAS-F | HC | DM3 | WRN    | 8;30974004;G;A                 | VAL                        | TP | 0.24 | 0.2602 0.2597        |
| CAS-F | HC | RM1 | WRN    | 8;30974004;G;A                 | VAL                        | TP | 0.07 | 0.1884 0.2074        |
| CAS-F | HC | RM3 | WRN    | 8;30974004;G;A                 | VAL                        | TP | 0.33 | 0.2844 0.2554        |
| CAS-F | HC | DM1 | WRN    | 8;30974004;G;A                 | VAL                        | TP | 0.09 | 0.1943 0.1798        |
| CAS-F | HC | RM2 | WRN    | 8;30974004;G;A                 | VAL                        | TP | 0.3  | 0.2688 0.2801        |
| CAS-F | HC | DM2 | WRN    | 8;30974004;G;A                 | NOT_PREDICTED_NOT_OBSERVED | TN | 0    | 0 0                  |
| CAS-E | HC | DM1 | ASCC2  | 22;30221691;C;T                | VAL                        | TP | 0.49 | 0.4664 0.4764        |
| CAS-E | HC | DM3 | ASCC2  | 22;30221691;C;T                | VAL                        | TP | 0.38 | 0.4505 0.4497        |
| CAS-E | HC | P   | ASCC2  | 22;30221691;C;T                | VAL                        | TP | 0.18 | 0.197 0.2092         |
| CAS-E | HC | DM2 | ASCC2  | 22;30221691;C;T                | VAL                        | TP | 0.28 | 0.3285 0.3297        |
| CAS-E | HC | RM  | ASCC2  | 22;30221691;C;T                | VAL                        | TP | 0.22 | 0.2697 0.2678        |
| CAS-E | HC | DM5 | ASCC2  | 22;30221691;C;T                | VAL                        | TP | 0.33 | 0.3858 0.3866        |
| CAS-E | LC | DM1 | BRCA2  | 13;32970126;A;T                | NOT_VAL                    | TN | 0.15 | 0 0                  |
| CAS-E | LC | RM  | BRCA2  | 13;32970126;A;T                | NOT_PREDICTED_NOT_OBSERVED | TN | 0    | 0 0                  |
| CAS-E | LC | DM2 | BRCA2  | 13;32970126;A;T                | NOT_PREDICTED_NOT_OBSERVED | TN | 0    | 0 0                  |
| CAS-E | LC | DM3 | BRCA2  | 13;32970126;A;T                | NOT_PREDICTED_NOT_OBSERVED | TN | 0    | 0 0                  |
| CAS-E | LC | DM5 | BRCA2  | 13;32970126;A;T                | NOT_PREDICTED_NOT_OBSERVED | TN | 0    | 0 0                  |
| CAS-E | LC | P   | BRCA2  | 13;32970126;A;T                | NOT_PREDICTED_NOT_OBSERVED | TN | 0    | 0 0                  |
| CAS-E | HC | DM1 | CDKN2A | 9;21974714;GGCAGCGCCCCGCTCCA;G | VAL                        | TP | 0.51 | 0.8977 0.8958        |
| CAS-E | HC | DM2 | CDKN2A | 9;21974714;GGCAGCGCCCCGCTCCA;G | VAL                        | TP | 0.39 | 0.7662 0.7872        |
| CAS-E | HC | DM3 | CDKN2A | 9;21974714;GGCAGCGCCCCGCTCCA;G | VAL                        | TP | 0.45 | 0.8901 0.8871        |
| CAS-E | HC | DM5 | CDKN2A | 9;21974714;GGCAGCGCCCCGCTCCA;G | VAL                        | TP | 0.4  | 0.8019 0.7935        |
| CAS-E | HC | P   | CDKN2A | 9;21974714;GGCAGCGCCCCGCTCCA;G | VAL                        | TP | 0.25 | 0.5726 0.6149        |
| CAS-E | HC | RM  | CDKN2A | 9;21974714;GGCAGCGCCCCGCTCCA;G | VAL                        | TP | 0.29 | 0.638 0.6444         |
| CAS-E | HC | P   | CEP290 | 12;88483003;G;A                | VAL                        | TP | 0.13 | 0.1085 0.1086        |
| CAS-E | HC | RM  | CEP290 | 12;88483003;G;A                | VAL                        | TP | 0.14 | 0.1832 0.1557        |
| CAS-E | HC | DM1 | CEP290 | 12;88483003;G;A                | VAL                        | TP | 0.32 | 0.3289 0.334         |
| CAS-E | HC | DM5 | CEP290 | 12;88483003;G;A                | VAL                        | TP | 0.23 | 0.2457 0.2408        |
| CAS-E | HC | DM2 | CEP290 | 12;88483003;G;A                | VAL                        | TP | 0.16 | 0.2195 0.2232        |
| CAS-E | HC | DM3 | CEP290 | 12;88483003;G;A                | VAL                        | TP | 0.25 | 0.2975 0.2894        |
| CAS-E | HC | DM3 | COPS6  | 7;99686912;G;A                 | VAL                        | TP | 0.29 | 0.3632 0.3757        |
| CAS-E | HC | DM2 | COPS6  | 7;99686912;G;A                 | VAL                        | TP | 0.28 | 0.315 0.3133         |
| CAS-E | HC | DM5 | COPS6  | 7;99686912;G;A                 | VAL                        | TP | 0.35 | 0.3602 0.3938        |
| CAS-E | HC | P   | COPS6  | 7;99686912;G;A                 | VAL                        | TP | 0.23 | 0.238 0.2285         |
| CAS-E | HC | DM1 | COPS6  | 7;99686912;G;A                 | VAL                        | TP | 0.42 | 0.4436 0.4447        |
| CAS-E | HC | RM  | COPS6  | 7;99686912;G;A                 | VAL                        | TP | 0.26 | 0.2376 0.2461        |

|       |    |     |         |                  |                            |    |      |        |        |
|-------|----|-----|---------|------------------|----------------------------|----|------|--------|--------|
| CAS-E | HC | DM2 | CSNK2A1 | 20;478391;G;A    | VAL                        | TP | 0.26 | 0.3482 | 0.3436 |
| CAS-E | HC | DM3 | CSNK2A1 | 20;478391;G;A    | VAL                        | TP | 0.33 | 0.442  | 0.4195 |
| CAS-E | HC | DM1 | CSNK2A1 | 20;478391;G;A    | VAL                        | TP | 0.45 | 0.4448 | 0.4603 |
| CAS-E | HC | P   | CSNK2A1 | 20;478391;G;A    | VAL                        | TP | 0.31 | 0.2235 | 0.2262 |
| CAS-E | HC | RM  | CSNK2A1 | 20;478391;G;A    | VAL                        | TP | 0.14 | 0.2341 | 0.2471 |
| CAS-E | HC | DM5 | CSNK2A1 | 20;478391;G;A    | VAL                        | TP | 0.35 | 0.4002 | 0.3912 |
| CAS-E | HC | DM1 | DYNC1H1 | 14;102482274;C;T | VAL                        | TP | 0.37 | 0.3971 | 0.3784 |
| CAS-E | HC | DM5 | DYNC1H1 | 14;102482274;C;T | VAL                        | TP | 0.28 | 0.3288 | 0.3231 |
| CAS-E | HC | RM  | DYNC1H1 | 14;102482274;C;T | VAL                        | TP | 0.25 | 0.2565 | 0.2608 |
| CAS-E | HC | DM3 | DYNC1H1 | 14;102482274;C;T | VAL                        | TP | 0.4  | 0.3762 | 0.3841 |
| CAS-E | HC | DM2 | DYNC1H1 | 14;102482274;C;T | VAL                        | TP | 0.27 | 0.2957 | 0.2935 |
| CAS-E | HC | P   | DYNC1H1 | 14;102482274;C;T | VAL                        | TP | 0.21 | 0.2576 | 0.2448 |
| CAS-E | HC | DM1 | EMD     | X;153609403;G;A  | VAL                        | TP | 0.88 | 0.8645 | 0.8707 |
| CAS-E | HC | DM2 | EMD     | X;153609403;G;A  | VAL                        | TP | 0.69 | 0.7087 | 0.7145 |
| CAS-E | HC | DM3 | EMD     | X;153609403;G;A  | VAL                        | TP | 0.84 | 0.8247 | 0.8168 |
| CAS-E | HC | DM5 | EMD     | X;153609403;G;A  | VAL                        | TP | 0.78 | 0.7401 | 0.7367 |
| CAS-E | HC | P   | EMD     | X;153609403;G;A  | VAL                        | TP | 0.43 | 0.4439 | 0.4084 |
| CAS-E | HC | RM  | EMD     | X;153609403;G;A  | VAL                        | TP | 0.41 | 0.4482 | 0.4605 |
| CAS-E | HC | DM5 | FZR1    | 19;3533325;C;T   | VAL                        | TP | 0.24 | 0.1807 | 0.1922 |
| CAS-E | HC | DM1 | FZR1    | 19;3533325;C;T   | NOT_PREDICTED_NOT_OBSERVED | TN | 0    | 0      | 0      |
| CAS-E | HC | RM  | FZR1    | 19;3533325;C;T   | NOT_PREDICTED_NOT_OBSERVED | TN | 0    | 0      | 0      |
| CAS-E | HC | DM2 | FZR1    | 19;3533325;C;T   | NOT_PREDICTED_NOT_OBSERVED | TN | 0    | 0      | 0      |
| CAS-E | HC | DM3 | FZR1    | 19;3533325;C;T   | NOT_PREDICTED_NOT_OBSERVED | TN | 0    | 0      | 0      |
| CAS-E | HC | P   | FZR1    | 19;3533325;C;T   | NOT_PREDICTED_NOT_OBSERVED | TN | 0    | 0      | 0      |
| CAS-E | HC | DM3 | MYO10   | 5;16676209;G;A   | VAL                        | TP | 0.61 | 0.5566 | 0.555  |
| CAS-E | HC | RM  | MYO10   | 5;16676209;G;A   | VAL                        | TP | 0.34 | 0.3318 | 0.3485 |
| CAS-E | HC | P   | MYO10   | 5;16676209;G;A   | VAL                        | TP | 0.29 | 0.3011 | 0.3027 |
| CAS-E | HC | DM2 | MYO10   | 5;16676209;G;A   | VAL                        | TP | 0.35 | 0.437  | 0.4167 |
| CAS-E | HC | DM5 | MYO10   | 5;16676209;G;A   | VAL                        | TP | 0.44 | 0.4954 | 0.4761 |
| CAS-E | HC | DM1 | MYO10   | 5;16676209;G;A   | VAL                        | TP | 0.58 | 0.5807 | 0.6115 |
| CAS-E | HC | RM  | NEIL1   | 15;75647322;A;G  | VAL                        | TP | 0.28 | 0.2197 | 0.2289 |
| CAS-E | HC | DM1 | NEIL1   | 15;75647322;A;G  | VAL                        | TP | 0.22 | 0.2918 | 0.2771 |
| CAS-E | HC | DM5 | NEIL1   | 15;75647322;A;G  | VAL                        | TP | 0.35 | 0.3418 | 0.36   |
| CAS-E | HC | P   | NEIL1   | 15;75647322;A;G  | VAL                        | TP | 0.25 | 0.2096 | 0.2142 |
| CAS-E | HC | DM3 | NEIL1   | 15;75647322;A;G  | VAL                        | TP | 0.47 | 0.4119 | 0.4161 |
| CAS-E | HC | DM2 | NEIL1   | 15;75647322;A;G  | VAL                        | TP | 0.26 | 0.3034 | 0.2992 |
| CAS-E | HC | DM1 | PDS5B   | 13;33233358;G;A  | VAL                        | TP | 0.66 | 0.6289 | 0.6463 |
| CAS-E | HC | DM3 | PDS5B   | 13;33233358;G;A  | VAL                        | TP | 0.58 | 0.6172 | 0.6253 |
| CAS-E | HC | P   | PDS5B   | 13;33233358;G;A  | VAL                        | TP | 0.15 | 0.2643 | 0.2568 |
| CAS-E | HC | DM2 | PDS5B   | 13;33233358;G;A  | VAL                        | TP | 0.43 | 0.5006 | 0.5352 |
| CAS-E | HC | RM  | PDS5B   | 13;33233358;G;A  | VAL                        | TP | 0.3  | 0.3104 | 0.3049 |
| CAS-E | HC | DM5 | PDS5B   | 13;33233358;G;A  | VAL                        | TP | 0.57 | 0.5463 | 0.5515 |
| CAS-E | LC | DM2 | REST    | 4;57798316;T;C   | VAL                        | FN | 0.23 | 0.2281 | 0.2314 |

|       |    |     |        |                   |                            |    |      |               |
|-------|----|-----|--------|-------------------|----------------------------|----|------|---------------|
| CAS-E | LC | DM5 | REST   | 4;57798316;T;C    | VAL                        | FN | 0.26 | 0.2436 0.2361 |
| CAS-E | LC | DM3 | REST   | 4;57798316;T;C    | VAL                        | FN | 0.32 | 0.2904 0.2963 |
| CAS-E | LC | DM1 | REST   | 4;57798316;T;C    | VAL                        | FN | 0.14 | 0.1538 0.1507 |
| CAS-E | LC | RM  | REST   | 4;57798316;T;C    | NOT_PREDICTED_NOT_OBSERVED | TN | 0    | 0 0           |
| CAS-E | LC | P   | REST   | 4;57798316;T;C    | NOT_PREDICTED_NOT_OBSERVED | TN | 0    | 0 0           |
| CAS-E | HC | P   | RNF168 | 3;196199162;G;A   | VAL                        | TP | 0.2  | 0.2624 0.2513 |
| CAS-E | HC | DM1 | RNF168 | 3;196199162;G;A   | VAL                        | TP | 0.56 | 0.5839 0.5843 |
| CAS-E | HC | DM3 | RNF168 | 3;196199162;G;A   | VAL                        | TP | 0.46 | 0.5251 0.526  |
| CAS-E | HC | DM5 | RNF168 | 3;196199162;G;A   | VAL                        | TP | 0.4  | 0.4747 0.4687 |
| CAS-E | HC | RM  | RNF168 | 3;196199162;G;A   | VAL                        | TP | 0.26 | 0.3248 0.3275 |
| CAS-E | HC | DM2 | RNF168 | 3;196199162;G;A   | VAL                        | TP | 0.47 | 0.4438 0.4569 |
| CAS-E | HC | DM5 | SMC3   | 10;112349666;G;A  | VAL                        | TP | 0.28 | 0.2453 0.2079 |
| CAS-E | HC | DM1 | SMC3   | 10;112349666;G;A  | NOT_PREDICTED_NOT_OBSERVED | TN | 0    | 0 0           |
| CAS-E | HC | RM  | SMC3   | 10;112349666;G;A  | NOT_PREDICTED_NOT_OBSERVED | TN | 0    | 0 0           |
| CAS-E | HC | DM2 | SMC3   | 10;112349666;G;A  | NOT_PREDICTED_NOT_OBSERVED | TN | 0    | 0 0           |
| CAS-E | HC | DM3 | SMC3   | 10;112349666;G;A  | NOT_PREDICTED_NOT_OBSERVED | TN | 0    | 0 0           |
| CAS-E | HC | P   | SMC3   | 10;112349666;G;A  | NOT_PREDICTED_NOT_OBSERVED | TN | 0    | 0 0           |
| CAS-E | HC | RM  | TP53   | 17;7578472;G;A    | VAL                        | TP | 0.17 | 0.2017 0.1997 |
| CAS-E | HC | DM5 | TP53   | 17;7578472;G;A    | VAL                        | TP | 0.22 | 0.2641 0.2576 |
| CAS-E | HC | DM3 | TP53   | 17;7578472;G;A    | VAL                        | TP | 0.25 | 0.4024 0.3912 |
| CAS-E | HC | P   | TP53   | 17;7578472;G;A    | VAL                        | TP | 0.14 | 0.2049 0.2022 |
| CAS-E | HC | DM2 | TP53   | 17;7578472;G;A    | VAL                        | TP | 0.25 | 0.3241 0.3303 |
| CAS-E | HC | DM1 | TP53   | 17;7578472;G;A    | VAL                        | TP | 0.24 | 0.4166 0.4172 |
| CAS-A | HC | RM1 | APC    | 5;112173567;C;T   | VAL                        | TP | 0.17 | 0.2425 0.2539 |
| CAS-A | HC | DM2 | APC    | 5;112173567;C;T   | VAL                        | TP | 0.54 | 0.5386 0.532  |
| CAS-A | HC | DM3 | APC    | 5;112173567;C;T   | VAL                        | TP | 0.45 | 0.498 0.4863  |
| CAS-A | HC | RM3 | APC    | 5;112173567;C;T   | VAL                        | TP | 0.32 | 0.3576 0.3613 |
| CAS-A | HC | DM1 | APC    | 5;112173567;C;T   | VAL                        | TP | 0.32 | 0.3859 0.3957 |
| CAS-A | HC | DM4 | APC    | 5;112173567;C;T   | VAL                        | TP | 0.43 | 0.4858 0.4974 |
| CAS-A | HC | RM2 | APC    | 5;112173567;C;T   | VAL                        | TP | 0.21 | 0.2868 0.3255 |
| CAS-A | LC | RM2 | CEP164 | 11;117222647;G;GA | NOT_VAL                    | TN | 0.09 | 0 0           |
| CAS-A | LC | DM4 | CEP164 | 11;117222647;G;GA | NOT_VAL                    | TN | 0.15 | 0 0           |
| CAS-A | LC | DM3 | CEP164 | 11;117222647;G;GA | NOT_PREDICTED_NOT_OBSERVED | TN | 0    | 0 0           |
| CAS-A | LC | DM1 | CEP164 | 11;117222647;G;GA | NOT_PREDICTED_NOT_OBSERVED | TN | 0    | 0 0           |
| CAS-A | LC | RM1 | CEP164 | 11;117222647;G;GA | NOT_PREDICTED_NOT_OBSERVED | TN | 0    | 0 0           |
| CAS-A | LC | RM3 | CEP164 | 11;117222647;G;GA | NOT_PREDICTED_NOT_OBSERVED | TN | 0    | 0 0           |
| CAS-A | LC | DM2 | CEP164 | 11;117222647;G;GA | NOT_PREDICTED_NOT_OBSERVED | TN | 0    | 0 0           |
| CAS-A | HC | DM3 | ENSA   | 1;150599971;T;A   | VAL                        | TP | 0.24 | 0.3013 0.2951 |
| CAS-A | HC | DM1 | ENSA   | 1;150599971;T;A   | VAL                        | TP | 0.46 | 0.4526 0.4683 |
| CAS-A | HC | RM2 | ENSA   | 1;150599971;T;A   | VAL                        | TP | 0.14 | 0.2428 0.2464 |
| CAS-A | HC | RM3 | ENSA   | 1;150599971;T;A   | VAL                        | TP | 0.22 | 0.2712 0.2634 |
| CAS-A | HC | RM1 | ENSA   | 1;150599971;T;A   | VAL                        | TP | 0.16 | 0.1955 0.185  |
| CAS-A | HC | DM2 | ENSA   | 1;150599971;T;A   | VAL                        | TP | 0.4  | 0.453 0.4526  |

|       |    |     |         |                             |                            |    |      |               |
|-------|----|-----|---------|-----------------------------|----------------------------|----|------|---------------|
| CAS-A | HC | DM4 | ENSA    | 1;150599971;T;A             | VAL                        | TP | 0.25 | 0.3367 0.3458 |
| CAS-A | HC | DM4 | MCM7    | 7;99696901;C;G              | VAL                        | TP | 0.17 | 0.1221 0.137  |
| CAS-A | HC | DM3 | MCM7    | 7;99696901;C;G              | NOT_PREDICTED_NOT_OBSERVED | TN | 0    | 0 0           |
| CAS-A | HC | DM1 | MCM7    | 7;99696901;C;G              | NOT_PREDICTED_NOT_OBSERVED | TN | 0    | 0 0           |
| CAS-A | HC | RM2 | MCM7    | 7;99696901;C;G              | NOT_PREDICTED_NOT_OBSERVED | TN | 0    | 0 0           |
| CAS-A | HC | RM1 | MCM7    | 7;99696901;C;G              | NOT_PREDICTED_NOT_OBSERVED | TN | 0    | 0 0           |
| CAS-A | HC | RM3 | MCM7    | 7;99696901;C;G              | NOT_PREDICTED_NOT_OBSERVED | TN | 0    | 0 0           |
| CAS-A | HC | DM2 | MCM7    | 7;99696901;C;G              | NOT_PREDICTED_NOT_OBSERVED | TN | 0    | 0 0           |
| CAS-A | HC | RM2 | PSMD8   | 19;38865332;C;T             | VAL                        | TP | 0.23 | 0.5206 0.5214 |
| CAS-A | HC | RM3 | PSMD8   | 19;38865332;C;T             | VAL                        | TP | 0.36 | 0.7007 0.728  |
| CAS-A | HC | DM4 | PSMD8   | 19;38865332;C;T             | VAL                        | TP | 0.4  | 0.7661 0.7439 |
| CAS-A | HC | DM3 | PSMD8   | 19;38865332;C;T             | VAL                        | TP | 0.32 | 0.5686 0.5895 |
| CAS-A | HC | DM1 | PSMD8   | 19;38865332;C;T             | VAL                        | TP | 0.3  | 0.5974 0.6057 |
| CAS-A | HC | RM1 | PSMD8   | 19;38865332;C;T             | VAL                        | TP | 0.22 | 0.4443 0.4459 |
| CAS-A | HC | DM2 | PSMD8   | 19;38865332;C;T             | VAL                        | TP | 0.41 | 0.8357 0.8566 |
| CAS-A | HC | DM1 | SDCCAG8 | 1;243471427;C;T             | VAL                        | TP | 0.24 | 0.2475 0.2471 |
| CAS-A | HC | RM1 | SDCCAG8 | 1;243471427;C;T             | VAL                        | TP | 0.31 | 0.2675 0.2826 |
| CAS-A | HC | RM3 | SDCCAG8 | 1;243471427;C;T             | VAL                        | TP | 0.45 | 0.3764 0.3668 |
| CAS-A | HC | DM2 | SDCCAG8 | 1;243471427;C;T             | VAL                        | TP | 0.47 | 0.4477 0.4465 |
| CAS-A | HC | DM3 | SDCCAG8 | 1;243471427;C;T             | VAL                        | TP | 0.42 | 0.4038 0.3943 |
| CAS-A | HC | DM4 | SDCCAG8 | 1;243471427;C;T             | VAL                        | TP | 0.6  | 0.6444 0.6424 |
| CAS-A | HC | RM2 | SDCCAG8 | 1;243471427;C;T             | VAL                        | TP | 0.28 | 0.3609 0.3454 |
| CAS-B | LC | RM2 | ANKLE2  | 12;133310637;T;C            | NOT_VAL                    | TN | 0.06 | 0 0           |
| CAS-B | LC | RM1 | ANKLE2  | 12;133310637;T;C            | NOT_PREDICTED_NOT_OBSERVED | TN | 0    | 0 0           |
| CAS-B | LC | RM3 | ANKLE2  | 12;133310637;T;C            | NOT_PREDICTED_NOT_OBSERVED | TN | 0    | 0 0           |
| CAS-B | LC | DM2 | ANKLE2  | 12;133310637;T;C            | NOT_PREDICTED_NOT_OBSERVED | TN | 0    | 0 0           |
| CAS-B | LC | DM3 | ANKLE2  | 12;133310637;T;C            | NOT_PREDICTED_NOT_OBSERVED | TN | 0    | 0 0           |
| CAS-B | LC | P   | ANKLE2  | 12;133310637;T;C            | NOT_PREDICTED_NOT_OBSERVED | TN | 0    | 0 0           |
| CAS-B | LC | DM3 | CDKN2A  | 9;21971163;GAGCAGCAGCAGCT;G | VAL                        | FN | 0.49 | 0.3502 0.3909 |
| CAS-B | LC | RM1 | CDKN2A  | 9;21971163;GAGCAGCAGCAGCT;G | VAL                        | FN | 0.46 | 0.3389 0.3616 |
| CAS-B | LC | DM2 | CDKN2A  | 9;21971163;GAGCAGCAGCAGCT;G | VAL                        | FN | 0.26 | 0.1866 0.204  |
| CAS-B | LC | RM3 | CDKN2A  | 9;21971163;GAGCAGCAGCAGCT;G | VAL                        | FN | 0.52 | 0.3412 0.3195 |
| CAS-B | LC | P   | CDKN2A  | 9;21971163;GAGCAGCAGCAGCT;G | VAL                        | FN | 0.33 | 0.2197 0.1927 |
| CAS-B | LC | RM2 | CDKN2A  | 9;21971163;GAGCAGCAGCAGCT;G | VAL                        | FN | 0.51 | 0.3163 0.4698 |
| CAS-B | HC | P   | KIF23   | 15;69733239;C;T             | VAL                        | TP | 0.32 | 0.4398 0.4017 |
| CAS-B | HC | RM2 | KIF23   | 15;69733239;C;T             | VAL                        | TP | 0.58 | 0.687 0.8373  |
| CAS-B | HC | DM2 | KIF23   | 15;69733239;C;T             | VAL                        | TP | 0.27 | 0.2326 0.2291 |
| CAS-B | HC | RM3 | KIF23   | 15;69733239;C;T             | VAL                        | TP | 0.59 | 0.5753 0.5741 |
| CAS-B | HC | DM3 | KIF23   | 15;69733239;C;T             | VAL                        | TP | 0.58 | 0.5147 0.556  |
| CAS-B | HC | RM1 | KIF23   | 15;69733239;C;T             | VAL                        | TP | 0.71 | 0.7118 0.7114 |
| CAS-B | HC | RM2 | TP53    | 17;7574003;G;A              | VAL                        | TP | 0.35 | 0.4476 0.9976 |
| CAS-B | HC | DM2 | TP53    | 17;7574003;G;A              | VAL                        | TP | 0.34 | 0.3623 0.3425 |
| CAS-B | HC | DM3 | TP53    | 17;7574003;G;A              | VAL                        | TP | 0.61 | 0.5989 0.6245 |

|       |    |     |        |                                               |                            |    |      |                          |
|-------|----|-----|--------|-----------------------------------------------|----------------------------|----|------|--------------------------|
| CAS-B | HC | RM3 | TP53   | 17;7574003;G;A                                | VAL                        | TP | 0.49 | 0.6014 0.6017            |
| CAS-B | HC | RM1 | TP53   | 17;7574003;G;A                                | VAL                        | TP | 0.53 | 0.621 0.6155             |
| CAS-B | HC | P   | TP53   | 17;7574003;G;A                                | VAL                        | TP | 0.37 | 0.4813 0.444             |
| CAS-B | LC | RM1 | TUBB4A | 19;6496379;A;G                                | VAL                        | FN | 0.01 | 0.1065 0.1075            |
| CAS-B | LC | P   | TUBB4A | 19;6496379;A;G                                | VAL                        | FN | 0.08 | 0.04739336<br>0.0569     |
| CAS-B | LC | RM2 | TUBB4A | 19;6496379;A;G                                | NOT_PREDICTED_NOT_OBSERVED | TN | 0    | 0 0                      |
| CAS-B | LC | RM3 | TUBB4A | 19;6496379;A;G                                | NOT_PREDICTED_OBSERVED     | FN | 0    | 0.1162 0.1099            |
| CAS-B | LC | DM2 | TUBB4A | 19;6496379;A;G                                | NOT_PREDICTED_OBSERVED     | FN | 0    | 0.1654 0.1489            |
| CAS-B | LC | DM3 | TUBB4A | 19;6496379;A;G                                | NOT_PREDICTED_OBSERVED     | FN | 0    | 0.0625 0.052             |
| CAS-C | HC | P   | CAMK2G | 10;75608338;G;A                               | VAL                        | TP | 0.28 | 0.2333 0.2457            |
| CAS-C | HC | DM1 | CAMK2G | 10;75608338;G;A                               | NOT_PREDICTED_NOT_OBSERVED | TN | 0    | 0 0                      |
| CAS-C | HC | DM3 | CAMK2G | 10;75608338;G;A                               | NOT_PREDICTED_NOT_OBSERVED | TN | 0    | 0 0                      |
| CAS-C | HC | DM5 | CAMK2G | 10;75608338;G;A                               | NOT_PREDICTED_NOT_OBSERVED | TN | 0    | 0 0                      |
| CAS-C | HC | DM2 | CAMK2G | 10;75608338;G;A                               | NOT_PREDICTED_NOT_OBSERVED | TN | 0    | 0 0                      |
| CAS-C | HC | DM4 | CAMK2G | 10;75608338;G;A                               | NOT_PREDICTED_NOT_OBSERVED | TN | 0    | 0 0                      |
| CAS-C | HC | DM6 | CAMK2G | 10;75608338;G;A                               | NOT_PREDICTED_NOT_OBSERVED | TN | 0    | 0 0                      |
| CAS-C | HC | DM1 | CENPE  | 4;104079820;T;C                               | VAL                        | TP | 0.47 | 0.4229 0.4292            |
| CAS-C | HC | P   | CENPE  | 4;104079820;T;C                               | VAL                        | TP | 0.26 | 0.3717 0.3951            |
| CAS-C | HC | DM2 | CENPE  | 4;104079820;T;C                               | VAL                        | TP | 0.46 | 0.4212 0.4186            |
| CAS-C | HC | DM6 | CENPE  | 4;104079820;T;C                               | VAL                        | TP | 0.41 | 0.4341                   |
| CAS-C | HC | DM5 | CENPE  | 4;104079820;T;C                               | VAL                        | TP | 0.35 | 0.3139 0.3142            |
| CAS-C | HC | DM3 | CENPE  | 4;104079820;T;C                               | VAL                        | TP | 0.36 | 0.3371 0.3286            |
| CAS-C | HC | DM4 | CENPE  | 4;104079820;T;C                               | VAL                        | TP | 0.33 | 0.3729 0.2781            |
| CAS-C | HC | DM2 | CEP290 | 12;88534987;GATAAGGAAATCAA<br>TAAATTATCTGCC;G | VAL                        | TP | 0.24 | 0.83333336<br>0.92753624 |
| CAS-C | HC | DM1 | CEP290 | 12;88534987;GATAAGGAAATCAA<br>TAAATTATCTGCC;G | VAL                        | TP | 0.16 | 0.712 0.6794             |
| CAS-C | HC | DM4 | CEP290 | 12;88534987;GATAAGGAAATCAA<br>TAAATTATCTGCC;G | NOT_VAL                    | FP | 0.29 | 0 0                      |
| CAS-C | HC | DM6 | CEP290 | 12;88534987;GATAAGGAAATCAA<br>TAAATTATCTGCC;G | NOT_VAL                    | FP | 0.31 | 0 0                      |
| CAS-C | HC | DM5 | CEP290 | 12;88534987;GATAAGGAAATCAA<br>TAAATTATCTGCC;G | NOT_VAL                    | FP | 0.15 | 0 0                      |
| CAS-C | HC | P   | CEP290 | 12;88534987;GATAAGGAAATCAA<br>TAAATTATCTGCC;G | VAL                        | TP | 0.3  | 0.6145 0.6774            |
| CAS-C | HC | DM3 | CEP290 | 12;88534987;GATAAGGAAATCAA<br>TAAATTATCTGCC;G | VAL                        | TP | 0.17 | 0.6153846<br>0.7123288   |
| CAS-C | HC | DM6 | CTNNB1 | 3;41266133;C;G                                | VAL                        | TP | 0.38 | 0.6744 0.5159            |
| CAS-C | HC | DM5 | CTNNB1 | 3;41266133;C;G                                | VAL                        | TP | 0.24 | 0.1752 0.3033            |
| CAS-C | HC | DM4 | CTNNB1 | 3;41266133;C;G                                | VAL                        | TP | 0.31 | 0.3544 0.3071            |
| CAS-C | HC | DM5 | CTNNB1 | 3;41266136;T;C                                | VAL                        | TP | 0.25 | 0.1773 0.3062            |
| CAS-C | HC | DM6 | CTNNB1 | 3;41266136;T;C                                | VAL                        | TP | 0.39 | 0.6743 0.5159            |
| CAS-C | HC | DM4 | CTNNB1 | 3;41266136;T;C                                | VAL                        | TP | 0.33 | 0.3568 0.3093            |
| CAS-C | HC | DM1 | CTNNB1 | 3;41266133;C;G                                | NOT_PREDICTED_NOT_OBSERVED | TN | 0    | 0 0                      |
| CAS-C | HC | DM1 | CTNNB1 | 3;41266136;T;C                                | NOT_PREDICTED_NOT_OBSERVED | TN | 0    | 0 0                      |
| CAS-C | HC | DM3 | CTNNB1 | 3;41266133;C;G                                | NOT_PREDICTED_NOT_OBSERVED | TN | 0    | 0 0                      |
| CAS-C | HC | DM3 | CTNNB1 | 3;41266136;T;C                                | NOT_PREDICTED_NOT_OBSERVED | TN | 0    | 0 0                      |
| CAS-C | HC | DM2 | CTNNB1 | 3;41266133;C;G                                | NOT_PREDICTED_NOT_OBSERVED | TN | 0    | 0 0                      |
| CAS-C | HC | DM2 | CTNNB1 | 3;41266136;T;C                                | NOT_PREDICTED_NOT_OBSERVED | TN | 0    | 0 0                      |
| CAS-C | HC | P   | CTNNB1 | 3;41266133;C;G                                | NOT_PREDICTED_NOT_OBSERVED | TN | 0    | 0 0                      |

|       |    |     |        |                  |                            |    |      |               |
|-------|----|-----|--------|------------------|----------------------------|----|------|---------------|
| CAS-C | HC | P   | CTNNB1 | 3;41266136;T;C   | NOT_PREDICTED_NOT_OBSERVED | TN | 0    | 0.0           |
| CAS-C | HC | DM1 | E2F5   | 8;86114455;T;G   | VAL                        | TP | 0.23 | 0.3084 0.3138 |
| CAS-C | HC | DM3 | E2F5   | 8;86114455;T;G   | NOT_PREDICTED_NOT_OBSERVED | TN | 0    | 0.0           |
| CAS-C | HC | DM5 | E2F5   | 8;86114455;T;G   | NOT_PREDICTED_NOT_OBSERVED | TN | 0    | 0.0           |
| CAS-C | HC | DM2 | E2F5   | 8;86114455;T;G   | NOT_PREDICTED_NOT_OBSERVED | TN | 0    | 0.0           |
| CAS-C | HC | DM4 | E2F5   | 8;86114455;T;G   | NOT_PREDICTED_NOT_OBSERVED | TN | 0    | 0.0           |
| CAS-C | HC | DM6 | E2F5   | 8;86114455;T;G   | NOT_PREDICTED_NOT_OBSERVED | TN | 0    | 0.0           |
| CAS-C | HC | P   | E2F5   | 8;86114455;T;G   | NOT_PREDICTED_NOT_OBSERVED | TN | 0    | 0.0           |
| CAS-C | LC | DM1 | HERC2  | 15;28518046;G;A  | NOT_VAL                    | TN | 0.25 | 0.0           |
| CAS-C | LC | DM6 | HERC2  | 15;28518046;G;A  | NOT_VAL                    | TN | 0.54 | 0.0           |
| CAS-C | LC | P   | HERC2  | 15;28518046;G;A  | NOT_VAL                    | TN | 0.3  | 0.0           |
| CAS-C | LC | DM4 | HERC2  | 15;28518046;G;A  | NOT_VAL                    | TN | 0.5  | 0.0           |
| CAS-C | LC | DM5 | HERC2  | 15;28518046;G;A  | NOT_VAL                    | TN | 0.26 | 0.0           |
| CAS-C | LC | DM2 | HERC2  | 15;28518046;G;A  | NOT_VAL                    | TN | 0.14 | 0.0           |
| CAS-C | LC | DM3 | HERC2  | 15;28518046;G;A  | NOT_PREDICTED_NOT_OBSERVED | TN | 0    | 0.0           |
| CAS-C | HC | P   | MYO10  | 5;16673936;A;G   | VAL                        | TP | 0.18 | 0.1561 0.1577 |
| CAS-C | HC | DM1 | MYO10  | 5;16673936;A;G   | NOT_PREDICTED_NOT_OBSERVED | TN | 0    | 0.0           |
| CAS-C | HC | DM3 | MYO10  | 5;16673936;A;G   | NOT_PREDICTED_NOT_OBSERVED | TN | 0    | 0.0           |
| CAS-C | HC | DM5 | MYO10  | 5;16673936;A;G   | NOT_PREDICTED_NOT_OBSERVED | TN | 0    | 0.0           |
| CAS-C | HC | DM2 | MYO10  | 5;16673936;A;G   | NOT_PREDICTED_NOT_OBSERVED | TN | 0    | 0.0           |
| CAS-C | HC | DM4 | MYO10  | 5;16673936;A;G   | NOT_PREDICTED_NOT_OBSERVED | TN | 0    | 0.0           |
| CAS-C | HC | DM6 | MYO10  | 5;16673936;A;G   | NOT_PREDICTED_NOT_OBSERVED | TN | 0    | 0.0           |
| CAS-C | HC | DM5 | NUP205 | 7;135301921;C;T  | VAL                        | TP | 0.17 | 0.1556 0.1554 |
| CAS-C | HC | DM1 | NUP205 | 7;135301921;C;T  | VAL                        | TP | 0.31 | 0.3353 0.3302 |
| CAS-C | HC | DM3 | NUP205 | 7;135301921;C;T  | VAL                        | TP | 0.21 | 0.2139 0.222  |
| CAS-C | HC | DM4 | NUP205 | 7;135301921;C;T  | VAL                        | TP | 0.22 | 0.2002 0.2327 |
| CAS-C | HC | P   | NUP205 | 7;135301921;C;T  | VAL                        | TP | 0.24 | 0.24 0.2392   |
| CAS-C | HC | DM2 | NUP205 | 7;135301921;C;T  | VAL                        | TP | 0.24 | 0.2957 0.2749 |
| CAS-C | HC | DM6 | NUP205 | 7;135301921;C;T  | VAL                        | TP | 0.22 | 0.4191 0.2177 |
| CAS-C | LC | DM2 | RAD18  | 3;9005278;C;T    | VAL                        | FN | 0.35 | 0.3834 0.4065 |
| CAS-C | LC | DM3 | RAD18  | 3;9005278;C;T    | VAL                        | FN | 0.41 | 0.3528 0.3389 |
| CAS-C | LC | P   | RAD18  | 3;9005278;C;T    | VAL                        | FN | 0.8  | 0.3615 0.3463 |
| CAS-C | LC | DM5 | RAD18  | 3;9005278;C;T    | VAL                        | FN | 0.31 | 0.2561 0.3716 |
| CAS-C | LC | DM1 | RAD18  | 3;9005278;C;T    | VAL                        | FN | 0.18 | 0.4294 0.4422 |
| CAS-C | LC | DM4 | RAD18  | 3;9005278;C;T    | VAL                        | FN | 0.5  | 0.219 0.2209  |
| CAS-C | LC | DM6 | RAD18  | 3;9005278;C;T    | VAL                        | FN | 0.35 | 0.96428574    |
| CAS-C | HC | DM2 | UBC    | 12;125398287;T;C | VAL                        | TP | 0.39 | 0.4079 0.3891 |
| CAS-C | HC | P   | UBC    | 12;125398287;T;C | VAL                        | TP | 0.25 | 0.3345 0.3222 |
| CAS-C | HC | DM1 | UBC    | 12;125398287;T;C | VAL                        | TP | 0.37 | 0.4112 0.4086 |
| CAS-C | HC | DM6 | UBC    | 12;125398287;T;C | VAL                        | TP | 0.36 | 0.4855        |
| CAS-C | HC | DM4 | UBC    | 12;125398287;T;C | VAL                        | TP | 0.28 | 0.3612 0.4084 |
| CAS-C | HC | DM3 | UBC    | 12;125398287;T;C | VAL                        | TP | 0.31 | 0.3114 0.3167 |
| CAS-C | HC | DM5 | UBC    | 12;125398287;T;C | VAL                        | TP | 0.23 | 0.3181 0.2259 |



|       |    |     |      |                  |                            |    |      |               |
|-------|----|-----|------|------------------|----------------------------|----|------|---------------|
| CAS-C | LC | DM3 | UNG  | 12;109541382;C;T | VAL                        | FN | 0.46 | 0.3216 0.3217 |
| CAS-C | LC | DM1 | UNG  | 12;109541382;C;T | VAL                        | FN | 0.39 | 0.4353 0.4294 |
| CAS-C | LC | P   | UNG  | 12;109541382;C;T | VAL                        | FN | 0.19 | 0.3576 0.3465 |
| CAS-C | LC | DM6 | UNG  | 12;109541382;C;T | VAL                        | FN | 0.34 | 0.2776 0.5611 |
| CAS-C | LC | DM2 | UNG  | 12;109541382;C;T | VAL                        | FN | 0.3  | 0.3976 0.4123 |
| CAS-C | LC | DM5 | UNG  | 12;109541382;C;T | VAL                        | FN | 0.1  | 0.2226 0.1628 |
| CAS-C | LC | DM4 | UNG  | 12;109541382;C;T | NOT_PREDICTED_NOT_OBSERVED | TN | 0    | 0 0           |
| CAS-C | HC | DM2 | WRN  | 8;30998973;C;T   | VAL                        | TP | 0.42 | 0.4079 0.4089 |
| CAS-C | HC | DM4 | WRN  | 8;30998973;C;T   | VAL                        | TP | 0.31 | 0.3259 0.3555 |
| CAS-C | HC | P   | WRN  | 8;30998973;C;T   | VAL                        | TP | 0.35 | 0.349 0.3542  |
| CAS-C | HC | DM6 | WRN  | 8;30998973;C;T   | VAL                        | TP | 0.36 | 0.6082 0.3963 |
| CAS-C | HC | DM1 | WRN  | 8;30998973;C;T   | VAL                        | TP | 0.4  | 0.4328 0.4383 |
| CAS-C | HC | DM3 | WRN  | 8;30998973;C;T   | VAL                        | TP | 0.26 | 0.3642 0.3569 |
| CAS-C | HC | DM5 | WRN  | 8;30998973;C;T   | VAL                        | TP | 0.29 | 0.1404 0.3608 |
| CAS-C | HC | DM5 | ZW10 | 11;113604472;G;A | VAL                        | TP | 0.33 | 0.3965 0.2715 |
| CAS-C | HC | DM2 | ZW10 | 11;113604472;G;A | VAL                        | TP | 0.36 | 0.3971 0.3906 |
| CAS-C | HC | DM4 | ZW10 | 11;113604472;G;A | VAL                        | TP | 0.39 | 0.353 0.2897  |
| CAS-C | HC | DM1 | ZW10 | 11;113604472;G;A | VAL                        | TP | 0.4  | 0.4397 0.4374 |
| CAS-C | HC | DM6 | ZW10 | 11;113604472;G;A | VAL                        | TP | 0.41 | 0.4443 0.268  |
| CAS-C | HC | P   | ZW10 | 11;113604472;G;A | VAL                        | TP | 0.23 | 0.3499 0.3436 |
| CAS-C | HC | DM3 | ZW10 | 11;113604472;G;A | VAL                        | TP | 0.26 | 0.3433 0.3282 |

**Supplementary Table 4. Primers used for validation by targeted amplicon sequencing of SNVs and small InDels.**

| Patient        | Gene    | Mutation included in validation               | Forward sequence                  | Reverse sequence               |
|----------------|---------|-----------------------------------------------|-----------------------------------|--------------------------------|
| CAS-F          | ENSA    | 1;150573651;A;G                               | AAATTAGCCGGGCGTGGTGT              | GCTGGAGTGCAATGGCATGA           |
| CAS-A          | ENSA    | 1;150599971;T;A                               | TCGAAGAACCTCCTTTAGCTCCA           | TGAGAGAGCTGAAGAGGCCAAAGC       |
| CAS-G          | UBE2T   | 1;202302637;G;A                               | GAGTCAACCATTTACCCACAACCTCA        | CCCATTGAACTCCTCAGATCC          |
| CAS-A          | SDCCAG8 | 1;243471427;C;T                               | CCGTGTTGGTGGTCTTTGTTTG            | TCCGTGCGCTAGAAGCATA            |
| CAS-E          | SMC3    | 10;112349666;G;A                              | TGTATACTGTTAATGCATCCTCATAT<br>G   | CTGCCACCTTTCTGTGTGC            |
| CAS-C          | CAMK2G  | 10;75608338;G;A                               | GCTTACCGCAGGCCAGATA               | GGTTCAGTATGCCTGTGCCCTCT        |
| CAS-C          | ZW10    | 11;113604472;G;A                              | GGGCAGCTGCTCTTCTTTCTG             | TTTGCAGGTGGGAGATGG             |
| CAS-A          | CEP164  | 11;117222647;G;A                              | GTGATCCAAGAGCGGGCAAA              | CTGGGAGGAGGCATCCACTG           |
| CAS-F          | NFRKB   | 11;129743677;A;G                              | TGACCACGGCTTCCCTGTTT              | CCCAGCCTAGCCTTCTGTCT           |
| CAS-F          | FEN1    | 11;61563864;T;G                               | CTGAGGAGCGAATCCGAGT               | CTGGGTCTGGCTCCTTGC             |
| CAS-C          | UNG     | 12;109541382;C;T                              | AGCGAGGCTGGGAGCAGTT               | TGGCACTGCCCTTCTTCTGA           |
| CAS-G          | DYNLL1  | 12;120934240;G;A                              | CCAGGCTTGCCCACTAGGT               | TTTCTCCAGCGCTGAGTAGC           |
| CAS-D          | UBC     | 12;125397821;G;A                              | TTTGCCTTGACATTCTCGATGG            | CACCTGGTGCTCCGTCTCAG           |
| CAS-C          | UBC     | 12;125398287;T;C                              | GGGATGCCTTCTTATCTTGGGA            | TCCGCTAAATTTGGCCGTTT           |
| CAS-D<br>CAS-B | ANKLE2  | 12;133310637;T;C                              | CCCACACACAACCCATTTAAC             | CCACCAGCCTGGCTAATTT            |
| CAS-G          | RHNO1   | 12;2996279;T;C                                | GGTGTGTGGCTTACGCCTGT              | GAGTCAGAGTTTACCCTGTTGG         |
| CAS-F          | SMUG1   | 12;54582294;C;G                               | CGAGACCAGCCTGACCAACA              | CCCGGGTTCAAGCGATTCTT           |
| CAS-E          | CEP290  | 12;88483003;G;A                               | CATTCTTGCAATATCTTAAGTTTGT<br>C    | TCTCTATTATGCTCGTTGGAGGG<br>AAG |
| CAS-C          | CEP290  | 12;88534987;GATAAGGAAATCAATAAATTATCT<br>GCC;G | ACACTTCCAGATTGTGACAATTATA<br>GTTG | AAAGTTGACCCAGATGACCTGCC        |
| CAS-F<br>CAS-E | BRCA2   | 13;32970126;A;T                               | TTAGTTCCCATACAGCATATCTACTG        | GCAGACACTGCAGTGATCCG           |
| CAS-E          | PDS5B   | 13;33233358;G;A                               | GCAGCAATGGCCACAATCAG              | TCACCTTATGAGCAGGTACCAGA<br>TTT |
| CAS-E          | DYNC1H1 | 14;102482274;C;T                              | TGCAGCTACGATCATGCAACC             | CCTGGTGAGCATGGAGAAG            |
| CAS-D          | PSMB11  | 14;23511991;G;A                               | TGGCCCTGAGCTTCTTACG               | GGCTTCTGGGTGCTCATGT            |
| CAS-C          | HERC2   | 15;28518046;G;A                               | CCCAAAGCGTTCCCGTCTG               | ACCAAAGGCCAGGAAGCAT            |
| CAS-G          | INO80   | 15;41337161;G;A                               | ACAAAGGGCAGCTGCAAAGG              | GGCTCCATCAGTACGCTCCT           |
| CAS-B          | KIF23   | 15;69733239;C;T                               | CATGAGCCAGCCACAGCTACA             | TCCTGGCTCCTGCTGCCTAC           |
| CAS-E          | NEIL1   | 15;75647322;A;G                               | TGACCATCTTGCCTGTTCTTCC            | GGGTGAGTGCAAGCAAGGAGA          |
| CAS-G          | PRKCB   | 16;24185900;C;T                               | ACGCTGCAGAAATTGCCATC              | CAGGAGGAGCTGAGGGAGA            |
| CAS-F          | KIF2B   | 17;51900950;G;A                               | GCGCCCTCGATGCAATACC               | CGCAGATGCGATGTTCTTGC           |
| CAS-D          | CLTC    | 17;57760301;C;T                               | CATTGAGTTCACAGAAAAGGAAATG<br>TT   | TGCATGTACAACAATGAAGTC<br>CACA  |
| CAS-F          | POLR2A  | 17;7404163;C;T                                | CCCATCCCGATGATGAAGACA             | GGACAAAGCACCCTCAAGG            |
| CAS-G          | POLR2A  | 17;7404625;G;A                                | TCCATGTTTCTTAGAGGTCCAAAGG         | ACGTCTGCTTGGCCTTCTT            |
| CAS-B          | TP53    | 17;7574003;G;A                                | CACCTGGAGTGAGCCCTGCT              | CCTCCTCTGTTGCTGCAGATCC         |
| CAS-D          | TP53    | 17;7577539;G;A                                | GGTGGCAAGTGGCTCCTGAC              | GGTTGGCTCTGACTGTACCACCA        |
| CAS-E          | TP53    | 17;7578472;G;A                                | CGCCTCACAACTCCGTCAT               | TTGCCAACTGGCCAAGACCT           |
| CAS-E          | FZR1    | 19;3533325;C;T                                | ATAGCACCCGGCCTCGTTG               | CAGGTACAGCACGGGTAGG            |
| CAS-A          | PSMD8   | 19;38865332;C;T                               | CGGGCTGAGGCAGGTTGTAG              | GCAGACCCCTGATTTACGG            |
| CAS-F<br>CAS-B | TUBB4A  | 19;6496379;A;G                                | TCTGTCTCTCCACCCTGGA               | CTCGGCTCCCAAAGTGCT             |

|       |             |                                                        |                                 |                                  |
|-------|-------------|--------------------------------------------------------|---------------------------------|----------------------------------|
| CAS-F | ANAPC1      | 2;112614429;G;A                                        | TCCACTGGTGCTGCATCCTT            | AATACCCATACAGGTTGTTGCATG<br>T    |
| CAS-G | ANAPC1      | 2;112625662;G;A                                        | TGGAGTTATTTCATCTAGTGGGTGCA<br>G | TTTGTGCACAGACATACTCGTATT<br>GG   |
| CAS-G | MSH6        | 2;48018128;G;A                                         | CAACAGTTGTGACTTCTCACCAGGA       | TTTCCCTTTCGCGGGATGA              |
| CAS-G | MSH6        | 2;48027175;G;A                                         | CCCAGGTGCTTAAAGGTATGACTTC       | ATTAGCCATTGATAAAAAGCTCCTG        |
| CAS-G | MSH6        | 2;48033352;C;T                                         | TGTTGCTTTTCTGCTCCTAGCATTTTTG    | ATAATGTACGACATTTTATAGTCT<br>CAGC |
| CAS-G | MSH6        | 2;48033791;G;A                                         | TGCTAATCTCCCAGAGGAAGTTATTC<br>A | TTTCATAGTGCATCATCCCTTCC          |
| CAS-F | ALMS1       | 2;73717382;C;A                                         | GCCAGTGTACTGGAGCATCTGTG         | GGCTTTGCTTCTACCTTCTGC            |
| CAS-E | CSNK2A<br>1 | 20;478391;G;A                                          | TCAAGGTTCACTTACCTTCAGAATCT<br>C | TGTCAGCATTATTTTCATGGCTCAA        |
| CAS-E | ASCC2       | 22;30221691;C;T                                        | AAGGCCAGGAGCCAGTCGAG            | CCCAGCAGAAGGCAGACC               |
| CAS-G | TOPBP1      | 3;133374283;G;A                                        | CCTCCATGCTTAACTGTGAGTTGC        | TTTAACCATTTGATTCCCACAGAA<br>A    |
| CAS-E | RNF168      | 3;196199162;G;A                                        | CTCTCAAACAGTAGATGCTCCAAAT<br>CT | AACCAAGAATCTTCTTTGAAGC<br>AG     |
| CAS-G | MLH1        | 3;37089083;G;A                                         | CCAGCACCGCTCTTGACCT             | TGCAAGCATCTCAGCCTTCTTC           |
| CAS-C | CTNNB1      | 3;41266133;C;G                                         | GGCAGCAACAGTCTTACCTGGA          | TCCCTGTTCCCACTCATAACAGGA         |
| CAS-C | CTNNB1      | 3;41266136;T;C                                         | GGCAGCAACAGTCTTACCTGGA          | TCCCTGTTCCCACTCATAACAGGA         |
| CAS-C | RAD18       | 3;9005278;C;T                                          | GGAGCCTGCCGAAGTTGTA             | TGGTGAGGCTGGATTGGTTG             |
| CAS-C | CENPE       | 4;104079820;T;C                                        | AAACCTTACCATGTTAACAGTATCGT<br>G | ACACTGATTACTGAGAAACTGCA<br>GC    |
| CAS-D | TACC3       | 4;1729764;ACAAAGCGGAGACTCCGCACGGAGC<br>CGAGGAAGAAATG;A | CACCCGCCTCTGAGACCCTA            | GTGCCGGCATTCTCCTC                |
| CAS-F | RNF4        | 4;2515439;C;T                                          | CTGGGACAAGGGCAAACCTCG           | CAGGGAATCACGGAGGCACT             |
| CAS-E | REST        | 4;57798316;T;C                                         | AAAGATTACAGCAAACACCTCAATC<br>G  | AGCAATCTTAAAAGGTTGTCTGCT<br>ATC  |
| CAS-A | APC         | 5;112173567;C;T                                        | CCTGGCTCAAGCTTGCCATC            | CGATGAGATGCCTTGGGACTT            |
| CAS-C | MYO10       | 5;16673936;A;G                                         | TTCCTGCCTGTGGATCAGAGC           | TGCTCCTAGGATACGGGAACA            |
| CAS-E | MYO10       | 5;16676209;G;A                                         | GGGTGGAGCTCTGGACTTACAGTT        | CTGCCTGAACCTCGGATGTGG            |
| CAS-F | MYO10       | 5;16701934;C;A                                         | TCACGGGTCAGTTCAGCTTCC           | AAGCGGGAGCTATGCTTGGGA            |
| CAS-D | NUP155      | 5;37350306;G;A                                         | CCATCTTCTGAGAACGTGAATTGTA<br>GC | AAGGCTGAAGCAGGGTGGTTT            |
| CAS-D | FGFR1OP     | 6;167417807;C;CA                                       | GCTGCAAGGTCTCGAAGGTC            | TGTTGACAGCGCCTGATCACT            |
| CAS-F | MDC1        | 6;30672477;C;T                                         | GGTCCGAGATGTGGGCTCAG            | GCCTACGTCTCAGGCTACTAGGG          |
| CAS-C | NUP205      | 7;135301921;C;T                                        | CCCTGAGCCTTTGCAGTTGG            | CAATCTCACCTTGACATTGCA            |
| CAS-F | POM121      | 7;72396963;C;T                                         | GGGTACTTCCCACCGTGTGC            | TCACATCGAGAACCGGAAA              |
| CAS-F | POM121      | 7;72396964;C;T                                         | GGGTACTTCCCACCGTGTGC            | TCACATCGAGAACCGGAAA              |
| CAS-E | COPS6       | 7;99686912;G;A                                         | GCCATCTCCAGGGAAGAACG            | GCGAGGAAACACTCCCAGT              |
| CAS-A | MCM7        | 7;99696901;C;G                                         | AAATACAGCTCACTAAGGGGAGAA        | GCATCGGCTAATGATGGAGCA            |
| CAS-F | WRN         | 8;30974004;G;A                                         | ACCATGCGGGCATGAGTTT             | CCACTATGAGCAACGGAGAGCA           |
| CAS-C | WRN         | 8;30998973;C;T                                         | TTTCAGAATTCTCAGCGTCTTGC         | CAGTGATCAGCTGACGGGAAA            |
| CAS-C | E2F5        | 8;86114455;T;G                                         | GGTGCTGATACTTTGGCTGTG           | GGTTTCAGAAGAGGGTGTGGT            |
| CAS-G | E2F5        | 8;86126052;C;A                                         | TTTGTTCGAGTGTTCCTCTCTT          | GAGGTAGATAACAGTCCCAAGTT<br>TCCA  |
| CAS-F | CDKN2A      | 9;21971017;G;A                                         | GGCATGGTACTGCCTCTGG             | TCCTGGACACGCTGGTGGT              |
| CAS-B | CDKN2A      | 9;21971163;GAGCAGCAGCAGCT;G                            | GCACGGTTCGGGTGAGAGT             | CCACCTGGCTCTGACCATT              |
| CAS-E | CDKN2A      | 9;21974714;GGCAGCGCCCCGCCTCCA;G                        | TCCCCTGCAGACCCTCTAC             | ATGGAGCCTTCGGCTGACTG             |
| CAS-G | CUL4B       | X;119678398;T;A                                        | TGCAAAATCAGACAGCATGCTTAAA       | GAAAGTGCAGAATAAGACAATTG<br>ATGG  |
| CAS-E | EMD         | X;153609403;G;A                                        | GAGCTCCTGGACCTGTCTTATT          | CGGGACCTGGCGATCTG                |

**Supplementary Table 5. Summary sequencing metrics of adjacent fresh frozen (FF) and formalin-fixed paraffin-embedded (FFPE) regions of a right lung metastasis from patient CAS-G.**

| <b>CAS-G DM6 – Liver Right</b>                 |           |             |
|------------------------------------------------|-----------|-------------|
| <b>Metric</b>                                  | <b>FF</b> | <b>FFPE</b> |
| Amount of DNA used (ng)                        | 500       | 1000        |
| pre-capture PCR cycles                         | 6         | 7           |
| pre-capture library yield (ng)                 | >750      | 981         |
| post-capture PCR cycles                        | 12        | 10          |
| post-capture PCR yield (ng)                    | 327       | 46.2        |
| library fragment length                        | 419       | 323         |
| Total reads                                    | 145687680 | 102417113   |
| Mapped reads                                   | 145661234 | 102407653   |
| % Reads mapped                                 | 99.98     | 99.99       |
| % Mapped reads duplicates                      | 5.24      | 5.93        |
| Properly paired                                | 136110826 | 95610291    |
| % Reads OnTarget                               | 69.26     | 83.96       |
| % Target bases >=10-fold Coverage              | 99.35     | 97.1        |
| % Target bases >=20-fold Coverage              | 98.36     | 93.81       |
| % Target bases >=100-fold Coverage             | 66.05     | 54.73       |
| Mean coverage for target bases                 | 156.93    | 137.43      |
| % Target bases with one fifth of mean coverage | 96.13     | 90.67       |

**Supplementary Table 6. Recurring SNVs and small InDels.**

| Patient | Sample | Variant         | MAF  | Mutation Type        | Gene   | COSMIC | Polyphen2                 | SIFT               | AA Change                      | Time Variant Acquisition |
|---------|--------|-----------------|------|----------------------|--------|--------|---------------------------|--------------------|--------------------------------|--------------------------|
| CAS-G   | DM5    | 1;27105932;G;A  | 0.22 | missense variant     | ARID1A | .      | possibly damaging (0.775) | .                  | ENSP00000320485.7;p.Gly1848Glu | LATE                     |
| CAS-G   | DM6    | 6;157406040;G;A | 0.09 | splice donor variant | ARID1B | .      | .                         | .                  | .                              | LATE                     |
| CAS-G   | DM1    | X;76854915;C;T  | 0.44 | missense variant     | ATRX   | .      | benign (0.027)            | tolerated (1)      | ENSP00000362441.4;p.Gly1974Glu | EARLY                    |
| CAS-G   | DM2    | X;76854915;C;T  | 0.41 | missense variant     | ATRX   | .      | benign (0.027)            | tolerated (1)      | ENSP00000362441.4;p.Gly1974Glu | EARLY                    |
| CAS-G   | DM3    | X;76854915;C;T  | 0.49 | missense variant     | ATRX   | .      | benign (0.027)            | tolerated (1)      | ENSP00000362441.4;p.Gly1974Glu | EARLY                    |
| CAS-G   | DM4    | X;76854915;C;T  | 0.40 | missense variant     | ATRX   | .      | benign (0.027)            | tolerated (1)      | ENSP00000362441.4;p.Gly1974Glu | EARLY                    |
| CAS-G   | DM5    | X;76854915;C;T  | 0.42 | missense variant     | ATRX   | .      | benign (0.027)            | tolerated (1)      | ENSP00000362441.4;p.Gly1974Glu | EARLY                    |
| CAS-G   | DM6    | X;76854915;C;T  | 0.44 | missense variant     | ATRX   | .      | benign (0.027)            | tolerated (1)      | ENSP00000362441.4;p.Gly1974Glu | EARLY                    |
| CAS-G   | P      | X;76854915;C;T  | 0.38 | missense variant     | ATRX   | .      | benign (0.027)            | tolerated (1)      | ENSP00000362441.4;p.Gly1974Glu | EARLY                    |
| CAS-G   | RM     | X;76854915;C;T  | 0.48 | missense variant     | ATRX   | .      | benign (0.027)            | tolerated (1)      | ENSP00000362441.4;p.Gly1974Glu | EARLY                    |
| CAS-G   | DM1    | 7;140453136;A;T | 0.67 | missense variant     | BRAF   | 476    | possibly damaging (0.792) | deleterious (0)    | ENSP00000288602.6;p.Val600Glu  | EARLY                    |
| CAS-G   | DM2    | 7;140453136;A;T | 0.59 | missense variant     | BRAF   | 476    | possibly damaging (0.792) | deleterious (0)    | ENSP00000288602.6;p.Val600Glu  | EARLY                    |
| CAS-G   | DM3    | 7;140453136;A;T | 0.67 | missense variant     | BRAF   | 476    | possibly damaging (0.792) | deleterious (0)    | ENSP00000288602.6;p.Val600Glu  | EARLY                    |
| CAS-G   | DM4    | 7;140453136;A;T | 0.67 | missense variant     | BRAF   | 476    | possibly damaging (0.792) | deleterious (0)    | ENSP00000288602.6;p.Val600Glu  | EARLY                    |
| CAS-G   | DM5    | 7;140453136;A;T | 0.60 | missense variant     | BRAF   | 476    | possibly damaging (0.792) | deleterious (0)    | ENSP00000288602.6;p.Val600Glu  | EARLY                    |
| CAS-G   | DM6    | 7;140453136;A;T | 0.63 | missense variant     | BRAF   | 476    | possibly damaging (0.792) | deleterious (0)    | ENSP00000288602.6;p.Val600Glu  | EARLY                    |
| CAS-G   | P      | 7;140453136;A;T | 0.50 | missense variant     | BRAF   | 476    | possibly damaging (0.792) | deleterious (0)    | ENSP00000288602.6;p.Val600Glu  | EARLY                    |
| CAS-G   | RM     | 7;140453136;A;T | 0.50 | missense variant     | BRAF   | 476    | possibly damaging (0.792) | deleterious (0)    | ENSP00000288602.6;p.Val600Glu  | EARLY                    |
| CAS-G   | DM1    | 7;2977589;C;T   | 0.55 | missense variant     | CARD11 | 222114 | benign (0.01)             | tolerated (0.41)   | ENSP00000380150.4;p.Met365Ile  | EARLY                    |
| CAS-G   | DM2    | 7;2977589;C;T   | 0.58 | missense variant     | CARD11 | 222114 | benign (0.01)             | tolerated (0.41)   | ENSP00000380150.4;p.Met365Ile  | EARLY                    |
| CAS-G   | DM3    | 7;2977589;C;T   | 0.66 | missense variant     | CARD11 | 222114 | benign (0.01)             | tolerated (0.41)   | ENSP00000380150.4;p.Met365Ile  | EARLY                    |
| CAS-G   | DM4    | 7;2977589;C;T   | 0.57 | missense variant     | CARD11 | 222114 | benign (0.01)             | tolerated (0.41)   | ENSP00000380150.4;p.Met365Ile  | EARLY                    |
| CAS-G   | DM5    | 7;2977589;C;T   | 0.62 | missense variant     | CARD11 | 222114 | benign (0.01)             | tolerated (0.41)   | ENSP00000380150.4;p.Met365Ile  | EARLY                    |
| CAS-G   | DM6    | 7;2969682;C;T   | 0.07 | missense variant     | CARD11 | .      | benign (0.359)            | deleterious (0)    | ENSP00000347695.3;p.Asp5Asn    | LATE                     |
| CAS-G   | DM6    | 7;2977589;C;T   | 0.67 | missense variant     | CARD11 | 222114 | benign (0.01)             | tolerated (0.41)   | ENSP00000380150.4;p.Met365Ile  | EARLY                    |
| CAS-G   | P      | 7;2977589;C;T   | 0.50 | missense variant     | CARD11 | 222114 | benign (0.01)             | tolerated (0.41)   | ENSP00000380150.4;p.Met365Ile  | EARLY                    |
| CAS-G   | RM     | 7;2977589;C;T   | 0.50 | missense variant     | CARD11 | 222114 | benign (0.01)             | tolerated (0.41)   | ENSP00000380150.4;p.Met365Ile  | EARLY                    |
| CAS-G   | DM6    | 22;19223266;G;A | 0.16 | missense variant     | CLTCL1 | .      | benign (0.14)             | tolerated (0.61)   | ENSP00000439662.1;p.Pro308Ser  | LATE                     |
| CAS-G   | DM4    | 12;48374703;G;A | 0.07 | missense variant     | COL2A1 | .      | unknown (0)               | tolerated (0.09)   | ENSP00000338213.6;p.Pro769Ser  | LATE                     |
| CAS-G   | DM4    | 14;95574322;G;A | 0.11 | missense variant     | DICER1 | .      | benign (0.015)            | tolerated (1)      | ENSP00000376783.1;p.Leu849Phe  | LATE                     |
| CAS-G   | DM5    | 19;10940840;C;T | 0.11 | missense variant     | DNM2   | .      | probably damaging (0.968) | tolerated (0.16)   | ENSP00000386192.3;p.Pro773Ser  | LATE                     |
| CAS-G   | DM6    | 7;55231517;G;A  | 0.07 | splice donor variant | EGFR   | .      | .                         | .                  | .                              | LATE                     |
| CAS-G   | DM1    | 4;126336276;C;T | 0.49 | missense variant     | FAT4   | .      | possibly damaging (0.747) | deleterious (0.04) | ENSP00000335169.5;p.Ser351Phe  | EARLY                    |
| CAS-G   | DM2    | 4;126336276;C;T | 0.41 | missense variant     | FAT4   | .      | possibly damaging (0.747) | deleterious (0.04) | ENSP00000335169.5;p.Ser351Phe  | EARLY                    |
| CAS-G   | DM3    | 4;126336276;C;T | 0.50 | missense variant     | FAT4   | .      | possibly damaging (0.747) | deleterious (0.04) | ENSP00000335169.5;p.Ser351Phe  | EARLY                    |

|       |     |                  |      |                  |         |  |                           |                    |                                |       |
|-------|-----|------------------|------|------------------|---------|--|---------------------------|--------------------|--------------------------------|-------|
| CAS-G | DM4 | 4;126336276;C;T  | 0.44 | missense variant | FAT4    |  | possibly damaging (0.747) | deleterious (0.04) | ENSP00000335169.5:p.Ser351Phe  | EARLY |
| CAS-G | DM5 | 4;126336276;C;T  | 0.50 | missense variant | FAT4    |  | possibly damaging (0.747) | deleterious (0.04) | ENSP00000335169.5:p.Ser351Phe  | EARLY |
| CAS-G | DM6 | 4;126336276;C;T  | 0.49 | missense variant | FAT4    |  | possibly damaging (0.747) | deleterious (0.04) | ENSP00000335169.5:p.Ser351Phe  | EARLY |
| CAS-G | P   | 4;126336276;C;T  | 0.50 | missense variant | FAT4    |  | possibly damaging (0.747) | deleterious (0.04) | ENSP00000335169.5:p.Ser351Phe  | EARLY |
| CAS-G | RM  | 4;126336276;C;T  | 0.50 | missense variant | FAT4    |  | possibly damaging (0.747) | deleterious (0.04) | ENSP00000335169.5:p.Ser351Phe  | EARLY |
| CAS-G | DM6 | 5;180056265;C;T  | 0.29 | missense variant | FLT4    |  | probably damaging (0.954) | deleterious (0)    | ENSP00000377016.3:p.Val327Met  | LATE  |
| CAS-G | DM1 | 16;9858331;C;T   | 0.32 | missense variant | GRIN2 A |  | benign (0.003)            | tolerated (0.79)   | ENSP00000454998.1:p.Asp1024Asn | EARLY |
| CAS-G | DM2 | 16;9858331;C;T   | 0.25 | missense variant | GRIN2 A |  | benign (0.003)            | tolerated (0.79)   | ENSP00000454998.1:p.Asp1024Asn | EARLY |
| CAS-G | DM3 | 16;9858331;C;T   | 0.49 | missense variant | GRIN2 A |  | benign (0.003)            | tolerated (0.79)   | ENSP00000454998.1:p.Asp1024Asn | EARLY |
| CAS-G | DM4 | 16;9858331;C;T   | 0.33 | missense variant | GRIN2 A |  | benign (0.003)            | tolerated (0.79)   | ENSP00000454998.1:p.Asp1024Asn | EARLY |
| CAS-G | DM5 | 16;9858331;C;T   | 0.27 | missense variant | GRIN2 A |  | benign (0.003)            | tolerated (0.79)   | ENSP00000454998.1:p.Asp1024Asn | EARLY |
| CAS-G | DM6 | 16;9858331;C;T   | 0.38 | missense variant | GRIN2 A |  | benign (0.003)            | tolerated (0.79)   | ENSP00000454998.1:p.Asp1024Asn | EARLY |
| CAS-G | P   | 16;9858331;C;T   | 0.40 | missense variant | GRIN2 A |  | benign (0.003)            | tolerated (0.79)   | ENSP00000454998.1:p.Asp1024Asn | EARLY |
| CAS-G | RM  | 16;9858331;C;T   | 0.48 | missense variant | GRIN2 A |  | benign (0.003)            | tolerated (0.79)   | ENSP00000454998.1:p.Asp1024Asn | EARLY |
| CAS-G | DM1 | 7;50468131;G;A   | 0.35 | missense variant | IKZF1   |  | probably damaging (1)     | deleterious (0)    | ENSP00000413025.1:p.Gly414Arg  | EARLY |
| CAS-G | DM2 | 7;50468131;G;A   | 0.35 | missense variant | IKZF1   |  | probably damaging (1)     | deleterious (0)    | ENSP00000413025.1:p.Gly414Arg  | EARLY |
| CAS-G | DM3 | 7;50468131;G;A   | 0.35 | missense variant | IKZF1   |  | probably damaging (1)     | deleterious (0)    | ENSP00000413025.1:p.Gly414Arg  | EARLY |
| CAS-G | DM4 | 7;50468131;G;A   | 0.30 | missense variant | IKZF1   |  | probably damaging (1)     | deleterious (0)    | ENSP00000413025.1:p.Gly414Arg  | EARLY |
| CAS-G | DM5 | 7;50468131;G;A   | 0.30 | missense variant | IKZF1   |  | probably damaging (1)     | deleterious (0)    | ENSP00000413025.1:p.Gly414Arg  | EARLY |
| CAS-G | DM6 | 7;50468131;G;A   | 0.30 | missense variant | IKZF1   |  | probably damaging (1)     | deleterious (0)    | ENSP00000413025.1:p.Gly414Arg  | EARLY |
| CAS-G | P   | 7;50468131;G;A   | 0.44 | missense variant | IKZF1   |  | probably damaging (1)     | deleterious (0)    | ENSP00000413025.1:p.Gly414Arg  | EARLY |
| CAS-G | RM  | 7;50468131;G;A   | 0.46 | missense variant | IKZF1   |  | probably damaging (1)     | deleterious (0)    | ENSP00000413025.1:p.Gly414Arg  | EARLY |
| CAS-G | DM4 | 4;55953837;G;A   | 0.03 | missense variant | KDR     |  | probably damaging (0.984) | deleterious (0.03) | ENSP00000263923.4:p.Ser1200Phe | LATE  |
| CAS-G | DM6 | 4;55953837;G;A   | 0.08 | missense variant | KDR     |  | probably damaging (0.984) | deleterious (0.03) | ENSP00000263923.4:p.Ser1200Phe | LATE  |
| CAS-G | DM4 | 11;118373167;C;T | 0.09 | missense variant | KMT2 A  |  | probably damaging (0.996) | deleterious (0)    | ENSP00000436786.1:p.Ser2187Phe | LATE  |
| CAS-G | DM6 | 11;118365066;C;T | 0.09 | missense variant | KMT2 A  |  | probably damaging (0.998) | deleterious (0.04) | ENSP00000436786.1:p.Pro1748Ser | LATE  |
| CAS-G | DM6 | 7;151845643;C;T  | 0.09 | missense variant | KMT2 C  |  | probably damaging (1)     | deleterious (0.01) | ENSP00000262189.6:p.Gly4457Ser | LATE  |
| CAS-G | DM6 | 12;49422948;C;T  | 0.09 | missense variant | KMT2 D  |  | unknown (0)               |                    | ENSP00000301067.7:p.Gly4716Glu | LATE  |
| CAS-G | DM6 | 12;49428241;G;A  | 0.26 | missense variant | KMT2 D  |  | benign (0.158)            |                    | ENSP00000301067.7:p.Pro3487Ser | LATE  |
| CAS-G | DM6 | 12;49444216;G;A  | 0.33 | missense variant | KMT2 D  |  | possibly damaging (0.747) |                    | ENSP00000301067.7:p.Pro1052Leu | LATE  |
| CAS-G | RM  | 22;21345976;G;A  | 0.19 | missense variant | LZTR1   |  | probably damaging (0.998) | deleterious (0)    | ENSP00000374006.3:p.Arg265His  | LATE  |
| CAS-G | DM6 | 16;15931998;C;T  | 0.04 | missense variant | MYH1 1  |  | benign (0.004)            | tolerated (0.2)    | ENSP00000379616.3:p.Val38Ile   | LATE  |
| CAS-G | DM6 | 17;15938135;C;T  | 0.08 | missense variant | NCOR1   |  | probably damaging (1)     | deleterious (0)    | ENSP00000268712.2:p.Gly2360Glu | LATE  |
| CAS-G | DM5 | 12;124832806;G;A | 0.06 | missense variant | NCOR2   |  | benign (0.23)             | tolerated (0.08)   | ENSP00000380513.1:p.Pro1291Leu | LATE  |
| CAS-G | DM4 | 5;176721420;G;A  | 0.04 | missense variant | NSD1    |  | possibly damaging (0.628) | deleterious (0.01) | ENSP00000343209.4:p.Glu2082Lys | LATE  |
| CAS-G | DM6 | 11;71723981;C;T  | 0.06 | missense variant | NUMA 1  |  | probably damaging (0.992) | tolerated (1)      | ENSP00000446396.1:p.Arg127Lys  | LATE  |
| CAS-G | DM1 | 16;23646286;A;C  | 0.67 | missense variant | PALB2   |  | benign (0.005)            | tolerated (0.13)   | ENSP00000261584.4:p.Cys527Trp  | EARLY |
| CAS-G | DM2 | 16;23646286;A;C  | 0.52 | missense variant | PALB2   |  | benign (0.005)            | tolerated (0.13)   | ENSP00000261584.4:p.Cys527Trp  | EARLY |
| CAS-G | DM3 | 16;23646286;A;C  | 0.51 | missense variant | PALB2   |  | benign (0.005)            | tolerated (0.13)   | ENSP00000261584.4:p.Cys527Trp  | EARLY |

|       |     |                 |      |                  |          |            |                           |                    |                                |       |
|-------|-----|-----------------|------|------------------|----------|------------|---------------------------|--------------------|--------------------------------|-------|
| CAS-G | DM4 | 16;23646286;A;C | 0.66 | missense variant | PALB2    | .          | benign (0.005)            | tolerated (0.13)   | ENSP00000261584.4;p.Cys527Trp  | EARLY |
| CAS-G | DM5 | 16;23646286;A;C | 0.50 | missense variant | PALB2    | .          | benign (0.005)            | tolerated (0.13)   | ENSP00000261584.4;p.Cys527Trp  | EARLY |
| CAS-G | DM6 | 16;23646286;A;C | 0.51 | missense variant | PALB2    | .          | benign (0.005)            | tolerated (0.13)   | ENSP00000261584.4;p.Cys527Trp  | EARLY |
| CAS-G | P   | 16;23646286;A;C | 0.31 | missense variant | PALB2    | .          | benign (0.005)            | tolerated (0.13)   | ENSP00000261584.4;p.Cys527Trp  | EARLY |
| CAS-G | RM  | 16;23646286;A;C | 0.42 | missense variant | PALB2    | .          | benign (0.005)            | tolerated (0.13)   | ENSP00000261584.4;p.Cys527Trp  | EARLY |
| CAS-G | DM4 | 3;178936091;G;A | 0.08 | missense variant | PIK3C A  | 763,125370 | probably damaging (0.959) | deleterious (0.01) | ENSP00000263967.3;p.Glu545Lys  | LATE  |
| CAS-G | DM6 | 3;178936082;G;A | 0.21 | missense variant | PIK3C A  | 760,125369 | probably damaging (0.96)  | tolerated (0.11)   | ENSP00000263967.3;p.Glu542Lys  | LATE  |
| CAS-G | DM5 | 6;117629979;G;A | 0.25 | missense variant | ROS1     | .          | probably damaging (1)     | deleterious (0)    | ENSP00000357494.3;p.Pro2183Ser | LATE  |
| CAS-G | DM3 | 3;47084115;G;A  | 0.06 | missense variant | SETD2    | .          | probably damaging (0.939) | deleterious (0)    | ENSP00000386759.3;p.Pro2392Ser | LATE  |
| CAS-G | DM1 | 12;47163174;C;T | 0.49 | missense variant | SLC38 A4 | .          | benign (0.097)            | tolerated (0.09)   | ENSP00000389843.1;p.Arg446Gln  | EARLY |
| CAS-G | DM2 | 12;47163174;C;T | 0.29 | missense variant | SLC38 A4 | .          | benign (0.097)            | tolerated (0.09)   | ENSP00000389843.1;p.Arg446Gln  | EARLY |
| CAS-G | DM3 | 12;47163174;C;T | 0.28 | missense variant | SLC38 A4 | .          | benign (0.097)            | tolerated (0.09)   | ENSP00000389843.1;p.Arg446Gln  | EARLY |
| CAS-G | DM4 | 12;47163174;C;T | 0.21 | missense variant | SLC38 A4 | .          | benign (0.097)            | tolerated (0.09)   | ENSP00000389843.1;p.Arg446Gln  | EARLY |
| CAS-G | DM5 | 12;47163174;C;T | 0.30 | missense variant | SLC38 A4 | .          | benign (0.097)            | tolerated (0.09)   | ENSP00000389843.1;p.Arg446Gln  | EARLY |
| CAS-G | DM6 | 12;47163174;C;T | 0.25 | missense variant | SLC38 A4 | .          | benign (0.097)            | tolerated (0.09)   | ENSP00000389843.1;p.Arg446Gln  | EARLY |
| CAS-G | P   | 12;47163174;C;T | 0.48 | missense variant | SLC38 A4 | .          | benign (0.097)            | tolerated (0.09)   | ENSP00000389843.1;p.Arg446Gln  | EARLY |
| CAS-G | RM  | 12;47163174;C;T | 0.50 | missense variant | SLC38 A4 | .          | benign (0.097)            | tolerated (0.09)   | ENSP00000389843.1;p.Arg446Gln  | EARLY |
| CAS-G | DM1 | 6;84302943;G;A  | 0.38 | missense variant | SNAP9 1  | .          | benign (0.161)            | tolerated (0.46)   | ENSP00000428215.1;p.Pro578Ser  | EARLY |
| CAS-G | DM2 | 6;84302943;G;A  | 0.33 | missense variant | SNAP9 1  | .          | benign (0.161)            | tolerated (0.46)   | ENSP00000428215.1;p.Pro578Ser  | EARLY |
| CAS-G | DM3 | 6;84302943;G;A  | 0.41 | missense variant | SNAP9 1  | .          | benign (0.161)            | tolerated (0.46)   | ENSP00000428215.1;p.Pro578Ser  | EARLY |
| CAS-G | DM4 | 6;84302943;G;A  | 0.38 | missense variant | SNAP9 1  | .          | benign (0.161)            | tolerated (0.46)   | ENSP00000428215.1;p.Pro578Ser  | EARLY |
| CAS-G | DM5 | 6;84302943;G;A  | 0.33 | missense variant | SNAP9 1  | .          | benign (0.161)            | tolerated (0.46)   | ENSP00000428215.1;p.Pro578Ser  | EARLY |
| CAS-G | DM6 | 6;84302943;G;A  | 0.23 | missense variant | SNAP9 1  | .          | benign (0.161)            | tolerated (0.46)   | ENSP00000428215.1;p.Pro578Ser  | EARLY |
| CAS-G | P   | 6;84302943;G;A  | 0.44 | missense variant | SNAP9 1  | .          | benign (0.161)            | tolerated (0.46)   | ENSP00000428215.1;p.Pro578Ser  | EARLY |
| CAS-G | RM  | 6;84302943;G;A  | 0.45 | missense variant | SNAP9 1  | .          | benign (0.161)            | tolerated (0.46)   | ENSP00000428215.1;p.Pro578Ser  | EARLY |
| CAS-G | DM4 | 16;11348713;G;A | 0.04 | missense variant | SOCS1    | .          | probably damaging (1)     | deleterious (0)    | ENSP00000329418.2;p.Pro208Leu  | LATE  |
| CAS-G | DM1 | 2;214354699;C;T | 0.61 | missense variant | SPAG1 6  | 222751     | possibly damaging (0.746) | deleterious (0.02) | ENSP00000332592.5;p.Pro319Ser  | EARLY |
| CAS-G | DM2 | 2;214354699;C;T | 0.47 | missense variant | SPAG1 6  | 222751     | possibly damaging (0.746) | deleterious (0.02) | ENSP00000332592.5;p.Pro319Ser  | EARLY |
| CAS-G | DM3 | 2;214354699;C;T | 0.43 | missense variant | SPAG1 6  | 222751     | possibly damaging (0.746) | deleterious (0.02) | ENSP00000332592.5;p.Pro319Ser  | EARLY |
| CAS-G | DM4 | 2;214354699;C;T | 0.53 | missense variant | SPAG1 6  | 222751     | possibly damaging (0.746) | deleterious (0.02) | ENSP00000332592.5;p.Pro319Ser  | EARLY |
| CAS-G | DM5 | 2;214354699;C;T | 0.47 | missense variant | SPAG1 6  | 222751     | possibly damaging (0.746) | deleterious (0.02) | ENSP00000332592.5;p.Pro319Ser  | EARLY |
| CAS-G | DM6 | 2;214354699;C;T | 0.50 | missense variant | SPAG1 6  | 222751     | possibly damaging (0.746) | deleterious (0.02) | ENSP00000332592.5;p.Pro319Ser  | EARLY |
| CAS-G | P   | 2;214354699;C;T | 0.39 | missense variant | SPAG1 6  | 222751     | possibly damaging (0.746) | deleterious (0.02) | ENSP00000332592.5;p.Pro319Ser  | EARLY |
| CAS-G | RM  | 2;214354699;C;T | 0.50 | missense variant | SPAG1 6  | 222751     | possibly damaging (0.746) | deleterious (0.02) | ENSP00000332592.5;p.Pro319Ser  | EARLY |
| CAS-G | DM4 | 4;106157647;C;T | 0.08 | missense variant | TET2     | .          | benign (0.011)            | tolerated (0.06)   | ENSP00000265149.5;p.His850Tyr  | LATE  |
| CAS-G | DM6 | 17;7579550;G;A  | 0.10 | missense variant | TP53     | 45013      | benign (0.266)            | tolerated (0.69)   | ENSP00000398846.2;p.Ser46Phe   | LATE  |
| CAS-G | DM4 | 1;186291703;G;A | 0.03 | stop gained      | TPR      | .          | .                         | .                  | ENSP00000356448.3;p.Arg2105Ter | LATE  |
| CAS-G | DM4 | 16;2121565;C;T  | 0.05 | missense variant | TSC2     | .          | benign (0.396)            | tolerated (0.13)   | ENSP00000384468.2;p.Pro632Ser  | LATE  |
| CAS-G | DM5 | 8;103307981;C;T | 0.05 | missense variant | UBR5     | .          | probably damaging (0.996) | deleterious (0)    | ENSP00000427819.1;p.Cys1226Tyr | LATE  |

|       |     |                 |      |                  |            |     |                           |                    |                                |       |
|-------|-----|-----------------|------|------------------|------------|-----|---------------------------|--------------------|--------------------------------|-------|
| CAS-G | DM1 | 17;5048874;G;A  | 0.49 | missense variant | USP6       | .   | probably damaging (0.991) | deleterious (0.01) | ENSP00000328010.4-p.Val723Met  | EARLY |
| CAS-G | DM2 | 17;5048874;G;A  | 0.57 | missense variant | USP6       | .   | probably damaging (0.991) | deleterious (0.01) | ENSP00000328010.4-p.Val723Met  | EARLY |
| CAS-G | DM3 | 17;5048874;G;A  | 0.49 | missense variant | USP6       | .   | probably damaging (0.991) | deleterious (0.01) | ENSP00000328010.4-p.Val723Met  | EARLY |
| CAS-G | DM4 | 17;5048874;G;A  | 0.47 | missense variant | USP6       | .   | probably damaging (0.991) | deleterious (0.01) | ENSP00000328010.4-p.Val723Met  | EARLY |
| CAS-G | DM5 | 17;5048874;G;A  | 0.67 | missense variant | USP6       | .   | probably damaging (0.991) | deleterious (0.01) | ENSP00000328010.4-p.Val723Met  | EARLY |
| CAS-G | DM6 | 17;5048874;G;A  | 0.50 | missense variant | USP6       | .   | probably damaging (0.991) | deleterious (0.01) | ENSP00000328010.4-p.Val723Met  | EARLY |
| CAS-G | P   | 17;5048874;G;A  | 0.47 | missense variant | USP6       | .   | probably damaging (0.991) | deleterious (0.01) | ENSP00000328010.4-p.Val723Met  | EARLY |
| CAS-G | RM  | 17;5048874;G;A  | 0.50 | missense variant | USP6       | .   | probably damaging (0.991) | deleterious (0.01) | ENSP00000328010.4-p.Val723Met  | EARLY |
| CAS-D | DM1 | 20;30959968;T;C | 0.17 | missense variant | ASXL1      | .   | benign (0.302)            | deleterious (0.01) | ENSP00000364841.1-p.Val81Ala   | LATE  |
| CAS-D | DM1 | 7;140453136;A;T | 0.58 | missense variant | BRAF       | 476 | possibly damaging (0.792) | deleterious (0)    | ENSP00000288602.6-p.Val600Glu  | EARLY |
| CAS-D | DM2 | 7;140453136;A;T | 0.50 | missense variant | BRAF       | 476 | possibly damaging (0.792) | deleterious (0)    | ENSP00000288602.6-p.Val600Glu  | EARLY |
| CAS-D | DM3 | 7;140453136;A;T | 0.47 | missense variant | BRAF       | 476 | possibly damaging (0.792) | deleterious (0)    | ENSP00000288602.6-p.Val600Glu  | EARLY |
| CAS-D | DM4 | 7;140453136;A;T | 0.50 | missense variant | BRAF       | 476 | possibly damaging (0.792) | deleterious (0)    | ENSP00000288602.6-p.Val600Glu  | EARLY |
| CAS-D | DM5 | 7;140453136;A;T | 0.50 | missense variant | BRAF       | 476 | possibly damaging (0.792) | deleterious (0)    | ENSP00000288602.6-p.Val600Glu  | EARLY |
| CAS-D | DM6 | 7;140453136;A;T | 0.49 | missense variant | BRAF       | 476 | possibly damaging (0.792) | deleterious (0)    | ENSP00000288602.6-p.Val600Glu  | EARLY |
| CAS-D | P1  | 7;140453136;A;T | 0.45 | missense variant | BRAF       | 476 | possibly damaging (0.792) | deleterious (0)    | ENSP00000288602.6-p.Val600Glu  | EARLY |
| CAS-D | P2  | 7;140453136;A;T | 0.44 | missense variant | BRAF       | 476 | possibly damaging (0.792) | deleterious (0)    | ENSP00000288602.6-p.Val600Glu  | EARLY |
| CAS-D | P3  | 7;140453136;A;T | 0.50 | missense variant | BRAF       | 476 | possibly damaging (0.792) | deleterious (0)    | ENSP00000288602.6-p.Val600Glu  | EARLY |
| CAS-D | RM  | 7;140453136;A;T | 0.50 | missense variant | BRAF       | 476 | possibly damaging (0.792) | deleterious (0)    | ENSP00000288602.6-p.Val600Glu  | EARLY |
| CAS-D | DM1 | 7;2985579;C;T   | 0.24 | missense variant | CARD1<br>1 | .   | probably damaging (1)     | deleterious (0)    | ENSP00000380150.4-p.Asp78Asn   | EARLY |
| CAS-D | DM2 | 7;2985579;C;T   | 0.40 | missense variant | CARD1<br>1 | .   | probably damaging (1)     | deleterious (0)    | ENSP00000380150.4-p.Asp78Asn   | EARLY |
| CAS-D | DM3 | 7;2985579;C;T   | 0.43 | missense variant | CARD1<br>1 | .   | probably damaging (1)     | deleterious (0)    | ENSP00000380150.4-p.Asp78Asn   | EARLY |
| CAS-D | DM4 | 7;2985579;C;T   | 0.42 | missense variant | CARD1<br>1 | .   | probably damaging (1)     | deleterious (0)    | ENSP00000380150.4-p.Asp78Asn   | EARLY |
| CAS-D | DM5 | 7;2985579;C;T   | 0.52 | missense variant | CARD1<br>1 | .   | probably damaging (1)     | deleterious (0)    | ENSP00000380150.4-p.Asp78Asn   | EARLY |
| CAS-D | DM6 | 7;2985579;C;T   | 0.53 | missense variant | CARD1<br>1 | .   | probably damaging (1)     | deleterious (0)    | ENSP00000380150.4-p.Asp78Asn   | EARLY |
| CAS-D | P1  | 7;2985579;C;T   | 0.43 | missense variant | CARD1<br>1 | .   | probably damaging (1)     | deleterious (0)    | ENSP00000380150.4-p.Asp78Asn   | EARLY |
| CAS-D | P2  | 7;2985579;C;T   | 0.50 | missense variant | CARD1<br>1 | .   | probably damaging (1)     | deleterious (0)    | ENSP00000380150.4-p.Asp78Asn   | EARLY |
| CAS-D | P3  | 7;2985579;C;T   | 0.66 | missense variant | CARD1<br>1 | .   | probably damaging (1)     | deleterious (0)    | ENSP00000380150.4-p.Asp78Asn   | EARLY |
| CAS-D | RM  | 7;2985579;C;T   | 0.41 | missense variant | CARD1<br>1 | .   | probably damaging (1)     | deleterious (0)    | ENSP00000380150.4-p.Asp78Asn   | EARLY |
| CAS-D | DM1 | 4;187541876;G;A | 0.63 | missense variant | FAT1       | .   | probably damaging (0.966) | tolerated (0.14)   | ENSP00000406229.2-p.Ser1955Phe | EARLY |
| CAS-D | DM2 | 4;187541876;G;A | 0.67 | missense variant | FAT1       | .   | probably damaging (0.966) | tolerated (0.14)   | ENSP00000406229.2-p.Ser1955Phe | EARLY |
| CAS-D | DM3 | 4;187541876;G;A | 0.31 | missense variant | FAT1       | .   | probably damaging (0.966) | tolerated (0.14)   | ENSP00000406229.2-p.Ser1955Phe | EARLY |
| CAS-D | DM4 | 4;187541876;G;A | 0.50 | missense variant | FAT1       | .   | probably damaging (0.966) | tolerated (0.14)   | ENSP00000406229.2-p.Ser1955Phe | EARLY |
| CAS-D | DM5 | 4;187541876;G;A | 0.31 | missense variant | FAT1       | .   | probably damaging (0.966) | tolerated (0.14)   | ENSP00000406229.2-p.Ser1955Phe | EARLY |
| CAS-D | DM6 | 4;187541876;G;A | 0.31 | missense variant | FAT1       | .   | probably damaging (0.966) | tolerated (0.14)   | ENSP00000406229.2-p.Ser1955Phe | EARLY |
| CAS-D | P1  | 4;187541876;G;A | 0.41 | missense variant | FAT1       | .   | probably damaging (0.966) | tolerated (0.14)   | ENSP00000406229.2-p.Ser1955Phe | EARLY |



|       |     |                 |      |                  |          |                                    |                           |                  |                                |       |
|-------|-----|-----------------|------|------------------|----------|------------------------------------|---------------------------|------------------|--------------------------------|-------|
| CAS-D | P2  | 4;187541876;G;A | 0.30 | missense variant | FAT1     |                                    | probably damaging (0.966) | tolerated (0.14) | ENSP00000406229.2;p.Ser1955Phe | EARLY |
| CAS-D | P3  | 4;187541876;G;A | 0.50 | missense variant | FAT1     |                                    | probably damaging (0.966) | tolerated (0.14) | ENSP00000406229.2;p.Ser1955Phe | EARLY |
| CAS-D | RM  | 4;187541876;G;A | 0.67 | missense variant | FAT1     |                                    | probably damaging (0.966) | tolerated (0.14) | ENSP00000406229.2;p.Ser1955Phe | EARLY |
| CAS-D | DM1 | 16;9858586;C;T  | 0.40 | missense variant | GRIN2 A  |                                    | probably damaging (1)     | tolerated (0.67) | ENSP00000454998.1;p.Gly939Arg  | EARLY |
| CAS-D | DM2 | 16;9858586;C;T  | 0.50 | missense variant | GRIN2 A  |                                    | probably damaging (1)     | tolerated (0.67) | ENSP00000454998.1;p.Gly939Arg  | EARLY |
| CAS-D | DM3 | 16;9858586;C;T  | 0.35 | missense variant | GRIN2 A  |                                    | probably damaging (1)     | tolerated (0.67) | ENSP00000454998.1;p.Gly939Arg  | EARLY |
| CAS-D | DM4 | 16;9858586;C;T  | 0.49 | missense variant | GRIN2 A  |                                    | probably damaging (1)     | tolerated (0.67) | ENSP00000454998.1;p.Gly939Arg  | EARLY |
| CAS-D | DM5 | 16;9858586;C;T  | 0.37 | missense variant | GRIN2 A  |                                    | probably damaging (1)     | tolerated (0.67) | ENSP00000454998.1;p.Gly939Arg  | EARLY |
| CAS-D | DM6 | 16;9858586;C;T  | 0.33 | missense variant | GRIN2 A  |                                    | probably damaging (1)     | tolerated (0.67) | ENSP00000454998.1;p.Gly939Arg  | EARLY |
| CAS-D | P1  | 16;9858586;C;T  | 0.33 | missense variant | GRIN2 A  |                                    | probably damaging (1)     | tolerated (0.67) | ENSP00000454998.1;p.Gly939Arg  | EARLY |
| CAS-D | P2  | 16;9858586;C;T  | 0.50 | missense variant | GRIN2 A  |                                    | probably damaging (1)     | tolerated (0.67) | ENSP00000454998.1;p.Gly939Arg  | EARLY |
| CAS-D | P3  | 16;9858586;C;T  | 0.43 | missense variant | GRIN2 A  |                                    | probably damaging (1)     | tolerated (0.67) | ENSP00000454998.1;p.Gly939Arg  | EARLY |
| CAS-D | RM  | 16;9858586;C;T  | 0.39 | missense variant | GRIN2 A  |                                    | probably damaging (1)     | tolerated (0.67) | ENSP00000454998.1;p.Gly939Arg  | EARLY |
| CAS-D | DM1 | 7;50467675;G;A  | 0.67 | missense variant | IKZF1    |                                    | possibly damaging (0.738) | deleterious (0)  | ENSP00000413025.1;p.Glu262Lys  | EARLY |
| CAS-D | DM2 | 7;50467675;G;A  | 0.35 | missense variant | IKZF1    |                                    | possibly damaging (0.738) | deleterious (0)  | ENSP00000413025.1;p.Glu262Lys  | EARLY |
| CAS-D | DM3 | 7;50467675;G;A  | 0.39 | missense variant | IKZF1    |                                    | possibly damaging (0.738) | deleterious (0)  | ENSP00000413025.1;p.Glu262Lys  | EARLY |
| CAS-D | DM4 | 7;50467675;G;A  | 0.50 | missense variant | IKZF1    |                                    | possibly damaging (0.738) | deleterious (0)  | ENSP00000413025.1;p.Glu262Lys  | EARLY |
| CAS-D | DM5 | 7;50467675;G;A  | 0.37 | missense variant | IKZF1    |                                    | possibly damaging (0.738) | deleterious (0)  | ENSP00000413025.1;p.Glu262Lys  | EARLY |
| CAS-D | DM6 | 7;50467675;G;A  | 0.38 | missense variant | IKZF1    |                                    | possibly damaging (0.738) | deleterious (0)  | ENSP00000413025.1;p.Glu262Lys  | EARLY |
| CAS-D | P1  | 7;50467675;G;A  | 0.41 | missense variant | IKZF1    |                                    | possibly damaging (0.738) | deleterious (0)  | ENSP00000413025.1;p.Glu262Lys  | EARLY |
| CAS-D | P2  | 7;50467675;G;A  | 0.50 | missense variant | IKZF1    |                                    | possibly damaging (0.738) | deleterious (0)  | ENSP00000413025.1;p.Glu262Lys  | EARLY |
| CAS-D | P3  | 7;50467675;G;A  | 0.44 | missense variant | IKZF1    |                                    | possibly damaging (0.738) | deleterious (0)  | ENSP00000413025.1;p.Glu262Lys  | EARLY |
| CAS-D | RM  | 7;50467675;G;A  | 0.45 | missense variant | IKZF1    |                                    | possibly damaging (0.738) | deleterious (0)  | ENSP00000413025.1;p.Glu262Lys  | EARLY |
| CAS-D | DM1 | 12;47162166;A;T | 0.19 | missense variant | SLC38 A4 |                                    | probably damaging (0.998) | deleterious (0)  | ENSP00000389843.1;p.Ile490Asn  | EARLY |
| CAS-D | DM2 | 12;47162166;A;T | 0.47 | missense variant | SLC38 A4 |                                    | probably damaging (0.998) | deleterious (0)  | ENSP00000389843.1;p.Ile490Asn  | EARLY |
| CAS-D | DM3 | 12;47162166;A;T | 0.50 | missense variant | SLC38 A4 |                                    | probably damaging (0.998) | deleterious (0)  | ENSP00000389843.1;p.Ile490Asn  | EARLY |
| CAS-D | DM4 | 12;47162166;A;T | 0.66 | missense variant | SLC38 A4 |                                    | probably damaging (0.998) | deleterious (0)  | ENSP00000389843.1;p.Ile490Asn  | EARLY |
| CAS-D | DM5 | 12;47162166;A;T | 0.61 | missense variant | SLC38 A4 |                                    | probably damaging (0.998) | deleterious (0)  | ENSP00000389843.1;p.Ile490Asn  | EARLY |
| CAS-D | DM6 | 12;47162166;A;T | 0.67 | missense variant | SLC38 A4 |                                    | probably damaging (0.998) | deleterious (0)  | ENSP00000389843.1;p.Ile490Asn  | EARLY |
| CAS-D | P1  | 12;47162166;A;T | 0.42 | missense variant | SLC38 A4 |                                    | probably damaging (0.998) | deleterious (0)  | ENSP00000389843.1;p.Ile490Asn  | EARLY |
| CAS-D | P2  | 12;47162166;A;T | 0.67 | missense variant | SLC38 A4 |                                    | probably damaging (0.998) | deleterious (0)  | ENSP00000389843.1;p.Ile490Asn  | EARLY |
| CAS-D | P3  | 12;47162166;A;T | 0.50 | missense variant | SLC38 A4 |                                    | probably damaging (0.998) | deleterious (0)  | ENSP00000389843.1;p.Ile490Asn  | EARLY |
| CAS-D | RM  | 12;47162166;A;T | 0.45 | missense variant | SLC38 A4 |                                    | probably damaging (0.998) | deleterious (0)  | ENSP00000389843.1;p.Ile490Asn  | EARLY |
| CAS-D | DM1 | 17;7577539;G;A  | 1.00 | missense variant | TP53     | 10656,120007,120005,1640831,120006 | probably damaging (1)     | deleterious (0)  | ENSP00000398846.2;p.Arg248Trp  | EARLY |
| CAS-D | DM2 | 17;7577539;G;A  | 0.54 | missense variant | TP53     | 10656,120007,120005,1640831,120006 | probably damaging (1)     | deleterious (0)  | ENSP00000398846.2;p.Arg248Trp  | EARLY |
| CAS-D | DM3 | 17;7577539;G;A  | 0.89 | missense variant | TP53     | 10656,120007,120005,1640831,120006 | probably damaging (1)     | deleterious (0)  | ENSP00000398846.2;p.Arg248Trp  | EARLY |

|       |     |                 |      |                  |        |                                    |                           |                    |                                |       |
|-------|-----|-----------------|------|------------------|--------|------------------------------------|---------------------------|--------------------|--------------------------------|-------|
| CAS-D | DM4 | 17;7577539;G;A  | 0.91 | missense variant | TP53   | 10656,120007,120005,1640831,120006 | probably damaging (1)     | deleterious (0)    | ENSP00000398846.2;p.Arg248Trp  | EARLY |
| CAS-D | DM5 | 17;7577539;G;A  | 1.00 | missense variant | TP53   | 10656,120007,120005,1640831,120006 | probably damaging (1)     | deleterious (0)    | ENSP00000398846.2;p.Arg248Trp  | EARLY |
| CAS-D | DM6 | 17;7577539;G;A  | 0.79 | missense variant | TP53   | 10656,120007,120005,1640831,120006 | probably damaging (1)     | deleterious (0)    | ENSP00000398846.2;p.Arg248Trp  | EARLY |
| CAS-D | P1  | 17;7577539;G;A  | 0.64 | missense variant | TP53   | 10656,120007,120005,1640831,120006 | probably damaging (1)     | deleterious (0)    | ENSP00000398846.2;p.Arg248Trp  | EARLY |
| CAS-D | P2  | 17;7577539;G;A  | 1.00 | missense variant | TP53   | 10656,120007,120005,1640831,120006 | probably damaging (1)     | deleterious (0)    | ENSP00000398846.2;p.Arg248Trp  | EARLY |
| CAS-D | P3  | 17;7577539;G;A  | 0.54 | missense variant | TP53   | 10656,120007,120005,1640831,120006 | probably damaging (1)     | deleterious (0)    | ENSP00000398846.2;p.Arg248Trp  | EARLY |
| CAS-D | RM  | 17;7577539;G;A  | 0.91 | missense variant | TP53   | 10656,120007,120005,1640831,120006 | probably damaging (1)     | deleterious (0)    | ENSP00000398846.2;p.Arg248Trp  | EARLY |
| CAS-F | DM1 | 1:27056295;C;T  | 0.68 | missense variant | ARID1A | .                                  | benign (0.053)            | .                  | ENSP00000320485.7;p.Pro431Ser  | EARLY |
| CAS-F | DM2 | 1:27056295;C;T  | 0.72 | missense variant | ARID1A | .                                  | benign (0.053)            | .                  | ENSP00000320485.7;p.Pro431Ser  | EARLY |
| CAS-F | DM3 | 1:27056295;C;T  | 0.60 | missense variant | ARID1A | .                                  | benign (0.053)            | .                  | ENSP00000320485.7;p.Pro431Ser  | EARLY |
| CAS-F | RM1 | 1:27056295;C;T  | 0.75 | missense variant | ARID1A | .                                  | benign (0.053)            | .                  | ENSP00000320485.7;p.Pro431Ser  | EARLY |
| CAS-F | RM2 | 1:27056295;C;T  | 0.65 | missense variant | ARID1A | .                                  | benign (0.053)            | .                  | ENSP00000320485.7;p.Pro431Ser  | EARLY |
| CAS-F | RM3 | 1:27056295;C;T  | 0.57 | missense variant | ARID1A | .                                  | benign (0.053)            | .                  | ENSP00000320485.7;p.Pro431Ser  | EARLY |
| CAS-F | DM1 | 12:46246137;C;T | 0.30 | stop gained      | ARID2  | .                                  | .                         | .                  | ENSP00000388357.1;p.Gln19Ter   | EARLY |
| CAS-F | DM1 | 12:46285631;C;T | 0.50 | missense variant | ARID2  | .                                  | possibly damaging (0.595) | tolerated (0.31)   | ENSP00000388357.1;p.Pro272Leu  | EARLY |
| CAS-F | DM2 | 12:46246137;C;T | 0.39 | stop gained      | ARID2  | .                                  | .                         | .                  | ENSP00000388357.1;p.Gln19Ter   | EARLY |
| CAS-F | DM2 | 12:46285631;C;T | 0.50 | missense variant | ARID2  | .                                  | possibly damaging (0.595) | tolerated (0.31)   | ENSP00000388357.1;p.Pro272Leu  | EARLY |
| CAS-F | DM3 | 12:46246137;C;T | 0.40 | stop gained      | ARID2  | .                                  | .                         | .                  | ENSP00000388357.1;p.Gln19Ter   | EARLY |
| CAS-F | DM3 | 12:46285631;C;T | 0.61 | missense variant | ARID2  | .                                  | possibly damaging (0.595) | tolerated (0.31)   | ENSP00000388357.1;p.Pro272Leu  | EARLY |
| CAS-F | RM1 | 12:46246137;C;T | 0.50 | stop gained      | ARID2  | .                                  | .                         | .                  | ENSP00000388357.1;p.Gln19Ter   | EARLY |
| CAS-F | RM1 | 12:46285631;C;T | 0.50 | missense variant | ARID2  | .                                  | possibly damaging (0.595) | tolerated (0.31)   | ENSP00000388357.1;p.Pro272Leu  | EARLY |
| CAS-F | RM2 | 12:46246137;C;T | 0.46 | stop gained      | ARID2  | .                                  | .                         | .                  | ENSP00000388357.1;p.Gln19Ter   | EARLY |
| CAS-F | RM2 | 12:46285631;C;T | 0.50 | missense variant | ARID2  | .                                  | possibly damaging (0.595) | tolerated (0.31)   | ENSP00000388357.1;p.Pro272Leu  | EARLY |
| CAS-F | RM3 | 12:46285631;C;T | 0.39 | missense variant | ARID2  | .                                  | possibly damaging (0.595) | tolerated (0.31)   | ENSP00000388357.1;p.Pro272Leu  | EARLY |
| CAS-F | RM3 | 12:46246137;C;T | 0.50 | stop gained      | ARID2  | .                                  | .                         | .                  | ENSP00000388357.1;p.Gln19Ter   | EARLY |
| CAS-F | DM1 | 7:140453136;A;T | 0.71 | missense variant | BRAF   | 476                                | possibly damaging (0.792) | deleterious (0)    | ENSP00000288602.6;p.Val600Glu  | EARLY |
| CAS-F | DM2 | 7:140453136;A;T | 0.80 | missense variant | BRAF   | 476                                | possibly damaging (0.792) | deleterious (0)    | ENSP00000288602.6;p.Val600Glu  | EARLY |
| CAS-F | DM3 | 7:140453136;A;T | 0.69 | missense variant | BRAF   | 476                                | possibly damaging (0.792) | deleterious (0)    | ENSP00000288602.6;p.Val600Glu  | EARLY |
| CAS-F | RM1 | 7:140453136;A;T | 0.72 | missense variant | BRAF   | 476                                | possibly damaging (0.792) | deleterious (0)    | ENSP00000288602.6;p.Val600Glu  | EARLY |
| CAS-F | RM2 | 7:140453136;A;T | 0.75 | missense variant | BRAF   | 476                                | possibly damaging (0.792) | deleterious (0)    | ENSP00000288602.6;p.Val600Glu  | EARLY |
| CAS-F | RM3 | 7:140453136;A;T | 0.61 | missense variant | BRAF   | 476                                | possibly damaging (0.792) | deleterious (0)    | ENSP00000288602.6;p.Val600Glu  | EARLY |
| CAS-F | DM1 | 22:19184164;G;A | 0.42 | missense variant | CLTCL1 | .                                  | possibly damaging (0.789) | deleterious (0.04) | ENSP00000439662.1;p.Arg1293Cys | EARLY |
| CAS-F | DM2 | 22:19184164;G;A | 0.49 | missense variant | CLTCL1 | .                                  | possibly damaging (0.789) | deleterious (0.04) | ENSP00000439662.1;p.Arg1293Cys | EARLY |
| CAS-F | DM3 | 22:19184164;G;A | 0.42 | missense variant | CLTCL1 | .                                  | possibly damaging (0.789) | deleterious (0.04) | ENSP00000439662.1;p.Arg1293Cys | EARLY |
| CAS-F | RM1 | 22:19184164;G;A | 0.56 | missense variant | CLTCL1 | .                                  | possibly damaging (0.789) | deleterious (0.04) | ENSP00000439662.1;p.Arg1293Cys | EARLY |
| CAS-F | RM2 | 22:19184164;G;A | 0.65 | missense variant | CLTCL1 | .                                  | possibly damaging (0.789) | deleterious (0.04) | ENSP00000439662.1;p.Arg1293Cys | EARLY |
| CAS-F | RM3 | 22:19184164;G;A | 0.32 | missense variant | CLTCL1 | .                                  | possibly damaging (0.789) | deleterious (0.04) | ENSP00000439662.1;p.Arg1293Cys | EARLY |
| CAS-F | DM1 | 12:48378791;G;A | 0.41 | missense variant | COL2A1 | .                                  | probably damaging (0.995) | deleterious (0.03) | ENSP00000338213.6;p.Pro538Leu  | EARLY |

|       |     |                 |      |                  |        |                 |                           |                    |                                |       |
|-------|-----|-----------------|------|------------------|--------|-----------------|---------------------------|--------------------|--------------------------------|-------|
| CAS-F | DM2 | 12;48378791;G;A | 0.38 | missense variant | COL2A1 | .               | probably damaging (0.995) | deleterious (0.03) | ENSP00000338213.6;p.Pro538Leu  | EARLY |
| CAS-F | DM3 | 12;48378791;G;A | 0.26 | missense variant | COL2A1 | .               | probably damaging (0.995) | deleterious (0.03) | ENSP00000338213.6;p.Pro538Leu  | EARLY |
| CAS-F | RM1 | 12;48378791;G;A | 0.42 | missense variant | COL2A1 | .               | probably damaging (0.995) | deleterious (0.03) | ENSP00000338213.6;p.Pro538Leu  | EARLY |
| CAS-F | RM2 | 12;48378791;G;A | 0.50 | missense variant | COL2A1 | .               | probably damaging (0.995) | deleterious (0.03) | ENSP00000338213.6;p.Pro538Leu  | EARLY |
| CAS-F | RM3 | 12;48378791;G;A | 0.49 | missense variant | COL2A1 | .               | probably damaging (0.995) | deleterious (0.03) | ENSP00000338213.6;p.Pro538Leu  | EARLY |
| CAS-F | DM1 | 7;55272970;C;T  | 0.77 | missense variant | EGFR   | .               | benign (0.14)             | tolerated (0.07)   | ENSP00000275493.2;p.Pro1098Leu | EARLY |
| CAS-F | DM2 | 7;55272970;C;T  | 0.70 | missense variant | EGFR   | .               | benign (0.14)             | tolerated (0.07)   | ENSP00000275493.2;p.Pro1098Leu | EARLY |
| CAS-F | DM3 | 7;55272970;C;T  | 1.00 | missense variant | EGFR   | .               | benign (0.14)             | tolerated (0.07)   | ENSP00000275493.2;p.Pro1098Leu | EARLY |
| CAS-F | RM1 | 7;55272970;C;T  | 1.00 | missense variant | EGFR   | .               | benign (0.14)             | tolerated (0.07)   | ENSP00000275493.2;p.Pro1098Leu | EARLY |
| CAS-F | RM2 | 7;55272970;C;T  | 0.88 | missense variant | EGFR   | .               | benign (0.14)             | tolerated (0.07)   | ENSP00000275493.2;p.Pro1098Leu | EARLY |
| CAS-F | RM3 | 7;55272970;C;T  | 1.00 | missense variant | EGFR   | .               | benign (0.14)             | tolerated (0.07)   | ENSP00000275493.2;p.Pro1098Leu | EARLY |
| CAS-F | DM1 | 4;187517744;G;A | 0.21 | missense variant | FAT1   | .               | benign (0.354)            | tolerated (0.32)   | ENSP00000406229.2;p.Pro4317Leu | EARLY |
| CAS-F | DM2 | 4;187517744;G;A | 0.39 | missense variant | FAT1   | .               | benign (0.354)            | tolerated (0.32)   | ENSP00000406229.2;p.Pro4317Leu | EARLY |
| CAS-F | DM3 | 4;187517744;G;A | 0.50 | missense variant | FAT1   | .               | benign (0.354)            | tolerated (0.32)   | ENSP00000406229.2;p.Pro4317Leu | EARLY |
| CAS-F | RM1 | 4;187517744;G;A | 0.19 | missense variant | FAT1   | .               | benign (0.354)            | tolerated (0.32)   | ENSP00000406229.2;p.Pro4317Leu | EARLY |
| CAS-F | RM2 | 4;187517744;G;A | 0.40 | missense variant | FAT1   | .               | benign (0.354)            | tolerated (0.32)   | ENSP00000406229.2;p.Pro4317Leu | EARLY |
| CAS-F | RM3 | 4;187517744;G;A | 0.41 | missense variant | FAT1   | .               | benign (0.354)            | tolerated (0.32)   | ENSP00000406229.2;p.Pro4317Leu | EARLY |
| CAS-F | DM1 | 4;126398317;G;A | 0.67 | missense variant | FAT4   | .               | probably damaging (0.999) | tolerated (1)      | ENSP00000335169.5;p.Asp2364Asn | EARLY |
| CAS-F | DM1 | 4;126372684;G;A | 0.53 | missense variant | FAT4   | .               | probably damaging (1)     | deleterious (0)    | ENSP00000335169.5;p.Asp1803Asn | EARLY |
| CAS-F | DM1 | 4;126239992;G;A | 0.19 | missense variant | FAT4   | .               | possibly damaging (0.904) | tolerated (0.17)   | ENSP00000377862.3;p.Gly809Glu  | EARLY |
| CAS-F | DM2 | 4;126398317;G;A | 0.56 | missense variant | FAT4   | .               | probably damaging (0.999) | tolerated (1)      | ENSP00000335169.5;p.Asp2364Asn | EARLY |
| CAS-F | DM2 | 4;126239992;G;A | 0.19 | missense variant | FAT4   | .               | possibly damaging (0.904) | tolerated (0.17)   | ENSP00000377862.3;p.Gly809Glu  | EARLY |
| CAS-F | DM2 | 4;126372684;G;A | 0.63 | missense variant | FAT4   | .               | probably damaging (1)     | deleterious (0)    | ENSP00000335169.5;p.Asp1803Asn | EARLY |
| CAS-F | DM3 | 4;126239992;G;A | 0.43 | missense variant | FAT4   | .               | possibly damaging (0.904) | tolerated (0.17)   | ENSP00000377862.3;p.Gly809Glu  | EARLY |
| CAS-F | DM3 | 4;126372684;G;A | 0.49 | missense variant | FAT4   | .               | probably damaging (1)     | deleterious (0)    | ENSP00000335169.5;p.Asp1803Asn | EARLY |
| CAS-F | DM3 | 4;126398317;G;A | 0.38 | missense variant | FAT4   | .               | probably damaging (0.999) | tolerated (1)      | ENSP00000335169.5;p.Asp2364Asn | EARLY |
| CAS-F | RM1 | 4;126398317;G;A | 0.67 | missense variant | FAT4   | .               | probably damaging (0.999) | tolerated (1)      | ENSP00000335169.5;p.Asp2364Asn | EARLY |
| CAS-F | RM1 | 4;126372684;G;A | 0.67 | missense variant | FAT4   | .               | probably damaging (1)     | deleterious (0)    | ENSP00000335169.5;p.Asp1803Asn | EARLY |
| CAS-F | RM1 | 4;126239992;G;A | 0.41 | missense variant | FAT4   | .               | possibly damaging (0.904) | tolerated (0.17)   | ENSP00000377862.3;p.Gly809Glu  | EARLY |
| CAS-F | RM2 | 4;126372684;G;A | 0.67 | missense variant | FAT4   | .               | probably damaging (1)     | deleterious (0)    | ENSP00000335169.5;p.Asp1803Asn | EARLY |
| CAS-F | RM2 | 4;126239992;G;A | 0.49 | missense variant | FAT4   | .               | possibly damaging (0.904) | tolerated (0.17)   | ENSP00000377862.3;p.Gly809Glu  | EARLY |
| CAS-F | RM2 | 4;126398317;G;A | 0.67 | missense variant | FAT4   | .               | probably damaging (0.999) | tolerated (1)      | ENSP00000335169.5;p.Asp2364Asn | EARLY |
| CAS-F | RM3 | 4;126239992;G;A | 0.39 | missense variant | FAT4   | .               | possibly damaging (0.904) | tolerated (0.17)   | ENSP00000377862.3;p.Gly809Glu  | EARLY |
| CAS-F | RM3 | 4;126398317;G;A | 0.30 | missense variant | FAT4   | .               | probably damaging (0.999) | tolerated (1)      | ENSP00000335169.5;p.Asp2364Asn | EARLY |
| CAS-F | RM3 | 4;126372684;G;A | 0.48 | missense variant | FAT4   | .               | probably damaging (1)     | deleterious (0)    | ENSP00000335169.5;p.Asp1803Asn | EARLY |
| CAS-F | DM1 | 7;151970859;C;T | 0.08 | missense variant | KMT2C  | 1179669,1179668 | probably damaging (1)     | deleterious (0)    | ENSP00000453752.1;p.Gly315Ser  | EARLY |
| CAS-F | DM2 | 7;151945171;G;A | 0.08 | missense variant | KMT2C  | .               | possibly damaging (0.729) | deleterious (0)    | ENSP00000453752.1;p.Ser783Phe  | EARLY |
| CAS-F | DM2 | 7;151970859;C;T | 0.06 | missense variant | KMT2C  | 1179669,1179668 | probably damaging (1)     | deleterious (0)    | ENSP00000453752.1;p.Gly315Ser  | EARLY |

|       |     |                 |      |                  |        |                 |                           |                    |                                |       |
|-------|-----|-----------------|------|------------------|--------|-----------------|---------------------------|--------------------|--------------------------------|-------|
| CAS-F | DM3 | 7;151970859;C;T | 0.07 | missense variant | KMT2C  | 1179669,1179668 | probably damaging (1)     | deleterious (0)    | ENSP00000453752.1:p.Gly315Ser  | EARLY |
| CAS-F | RM1 | 7;151970859;C;T | 0.07 | missense variant | KMT2C  | 1179669,1179668 | probably damaging (1)     | deleterious (0)    | ENSP00000453752.1:p.Gly315Ser  | EARLY |
| CAS-F | RM1 | 7;151927025;A;G | 0.14 | missense variant | KMT2C  | 253767,253768   | probably damaging (0.999) | deleterious (0)    | ENSP00000262189.6:p.Tyr987His  | EARLY |
| CAS-F | RM1 | 7;151945171;G;A | 0.02 | missense variant | KMT2C  | .               | possibly damaging (0.729) | deleterious (0)    | ENSP00000453752.1:p.Ser783Phe  | EARLY |
| CAS-F | RM2 | 7;151945171;G;A | 0.10 | missense variant | KMT2C  | .               | possibly damaging (0.729) | deleterious (0)    | ENSP00000453752.1:p.Ser783Phe  | EARLY |
| CAS-F | RM2 | 7;151927025;A;G | 0.07 | missense variant | KMT2C  | 253767,253768   | probably damaging (0.999) | deleterious (0)    | ENSP00000262189.6:p.Tyr987His  | EARLY |
| CAS-F | RM2 | 7;151970859;C;T | 0.10 | missense variant | KMT2C  | 1179669,1179668 | probably damaging (1)     | deleterious (0)    | ENSP00000453752.1:p.Gly315Ser  | EARLY |
| CAS-F | RM3 | 7;151927025;A;G | 0.06 | missense variant | KMT2C  | 253767,253768   | probably damaging (0.999) | deleterious (0)    | ENSP00000262189.6:p.Tyr987His  | EARLY |
| CAS-F | RM3 | 7;151945171;G;A | 0.04 | missense variant | KMT2C  | .               | possibly damaging (0.729) | deleterious (0)    | ENSP00000453752.1:p.Ser783Phe  | EARLY |
| CAS-F | RM3 | 7;151970859;C;T | 0.02 | missense variant | KMT2C  | 1179669,1179668 | probably damaging (1)     | deleterious (0)    | ENSP00000453752.1:p.Gly315Ser  | EARLY |
| CAS-F | DM1 | 16;15841910;C;T | 0.50 | missense variant | MYH11  | .               | probably damaging (0.999) | deleterious (0.02) | ENSP00000379616.3:p.Arg732His  | EARLY |
| CAS-F | DM2 | 16;15841910;C;T | 0.59 | missense variant | MYH11  | .               | probably damaging (0.999) | deleterious (0.02) | ENSP00000379616.3:p.Arg732His  | EARLY |
| CAS-F | DM3 | 16;15841910;C;T | 0.67 | missense variant | MYH11  | .               | probably damaging (0.999) | deleterious (0.02) | ENSP00000379616.3:p.Arg732His  | EARLY |
| CAS-F | RM1 | 16;15841910;C;T | 0.50 | missense variant | MYH11  | .               | probably damaging (0.999) | deleterious (0.02) | ENSP00000379616.3:p.Arg732His  | EARLY |
| CAS-F | RM2 | 16;15841910;C;T | 0.33 | missense variant | MYH11  | .               | probably damaging (0.999) | deleterious (0.02) | ENSP00000379616.3:p.Arg732His  | EARLY |
| CAS-F | RM3 | 16;15841910;C;T | 0.59 | missense variant | MYH11  | .               | probably damaging (0.999) | deleterious (0.02) | ENSP00000379616.3:p.Arg732His  | EARLY |
| CAS-F | DM3 | 9;127915915;C;T | 0.59 | missense variant | PPP6C  | .               | probably damaging (1)     | deleterious (0)    | ENSP00000392147.1:p.Gly226Glu  | LATE  |
| CAS-F | DM1 | 6;106534435;G;A | 0.55 | missense variant | PRDM1  | .               | benign (0.179)            | tolerated (0.21)   | ENSP00000358092.4:p.Asp3Asn    | EARLY |
| CAS-F | DM2 | 6;106534435;G;A | 0.67 | missense variant | PRDM1  | .               | benign (0.179)            | tolerated (0.21)   | ENSP00000358092.4:p.Asp3Asn    | EARLY |
| CAS-F | DM3 | 6;106534435;G;A | 0.33 | missense variant | PRDM1  | .               | benign (0.179)            | tolerated (0.21)   | ENSP00000358092.4:p.Asp3Asn    | EARLY |
| CAS-F | RM1 | 6;106534435;G;A | 0.67 | missense variant | PRDM1  | .               | benign (0.179)            | tolerated (0.21)   | ENSP00000358092.4:p.Asp3Asn    | EARLY |
| CAS-F | RM2 | 6;106534435;G;A | 0.64 | missense variant | PRDM1  | .               | benign (0.179)            | tolerated (0.21)   | ENSP00000358092.4:p.Asp3Asn    | EARLY |
| CAS-F | RM3 | 6;106534435;G;A | 0.67 | missense variant | PRDM1  | .               | benign (0.179)            | tolerated (0.21)   | ENSP00000358092.4:p.Asp3Asn    | EARLY |
| CAS-F | DM1 | 6;117714445;C;T | 0.19 | missense variant | ROS1   | 1697839,1697840 | benign (0.169)            | tolerated (0.24)   | ENSP00000357494.3:p.Glu402Lys  | EARLY |
| CAS-F | DM2 | 6;117714445;C;T | 0.39 | missense variant | ROS1   | 1697839,1697840 | benign (0.169)            | tolerated (0.24)   | ENSP00000357494.3:p.Glu402Lys  | EARLY |
| CAS-F | DM3 | 6;117714445;C;T | 0.56 | missense variant | ROS1   | 1697839,1697840 | benign (0.169)            | tolerated (0.24)   | ENSP00000357494.3:p.Glu402Lys  | EARLY |
| CAS-F | RM1 | 6;117714445;C;T | 0.43 | missense variant | ROS1   | 1697839,1697840 | benign (0.169)            | tolerated (0.24)   | ENSP00000357494.3:p.Glu402Lys  | EARLY |
| CAS-F | RM2 | 6;117714445;C;T | 0.45 | missense variant | ROS1   | 1697839,1697840 | benign (0.169)            | tolerated (0.24)   | ENSP00000357494.3:p.Glu402Lys  | EARLY |
| CAS-F | RM3 | 6;117714445;C;T | 0.59 | missense variant | ROS1   | 1697839,1697840 | benign (0.169)            | tolerated (0.24)   | ENSP00000357494.3:p.Glu402Lys  | EARLY |
| CAS-F | DM1 | 6;84270618;G;A  | 0.16 | missense variant | SNAP91 | .               | possibly damaging (0.604) | deleterious (0.04) | ENSP00000428215.1:p.Pro831Ser  | EARLY |
| CAS-F | DM2 | 6;84270618;G;A  | 0.24 | missense variant | SNAP91 | .               | possibly damaging (0.604) | deleterious (0.04) | ENSP00000428215.1:p.Pro831Ser  | EARLY |
| CAS-F | DM3 | 6;84270618;G;A  | 0.67 | missense variant | SNAP91 | .               | possibly damaging (0.604) | deleterious (0.04) | ENSP00000428215.1:p.Pro831Ser  | EARLY |
| CAS-F | RM1 | 6;84270618;G;A  | 0.40 | missense variant | SNAP91 | .               | possibly damaging (0.604) | deleterious (0.04) | ENSP00000428215.1:p.Pro831Ser  | EARLY |
| CAS-F | RM2 | 6;84270618;G;A  | 0.41 | missense variant | SNAP91 | .               | possibly damaging (0.604) | deleterious (0.04) | ENSP00000428215.1:p.Pro831Ser  | EARLY |
| CAS-F | RM3 | 6;84270618;G;A  | 0.27 | missense variant | SNAP91 | .               | possibly damaging (0.604) | deleterious (0.04) | ENSP00000428215.1:p.Pro831Ser  | EARLY |
| CAS-F | DM1 | 8;103291368;G;A | 0.50 | stop gained      | UBR5   | 1472022         | .                         | .                  | ENSP00000427819.1:p.Arg2018Ter | EARLY |
| CAS-F | DM2 | 8;103291368;G;A | 0.35 | stop gained      | UBR5   | 1472022         | .                         | .                  | ENSP00000427819.1:p.Arg2018Ter | EARLY |
| CAS-F | DM3 | 8;103291368;G;A | 0.50 | stop gained      | UBR5   | 1472022         | .                         | .                  | ENSP00000427819.1:p.Arg2018Ter | EARLY |

|       |     |                 |      |                  |        |                 |                           |                    |                               |       |
|-------|-----|-----------------|------|------------------|--------|-----------------|---------------------------|--------------------|-------------------------------|-------|
| CAS-F | RM1 | 8;103291368;G;A | 0.56 | stop gained      | UBR5   | 1472022         | .                         | .                  | ENSP00000427819.1p.Arg2018Ter | EARLY |
| CAS-F | RM2 | 8;103291368;G;A | 0.47 | stop gained      | UBR5   | 1472022         | .                         | .                  | ENSP00000427819.1p.Arg2018Ter | EARLY |
| CAS-F | RM3 | 8;103291368;G;A | 0.67 | stop gained      | UBR5   | 1472022         | .                         | .                  | ENSP00000427819.1p.Arg2018Ter | EARLY |
| CAS-F | DM1 | 8;30974004;G;A  | 0.29 | missense variant | WRN    | .               | probably damaging (0.999) | deleterious (0)    | ENSP00000298139.5p.Arg803Lys  | EARLY |
| CAS-F | DM3 | 8;30974004;G;A  | 0.50 | missense variant | WRN    | .               | probably damaging (0.999) | deleterious (0)    | ENSP00000298139.5p.Arg803Lys  | EARLY |
| CAS-F | RM1 | 8;30974004;G;A  | 0.14 | missense variant | WRN    | .               | probably damaging (0.999) | deleterious (0)    | ENSP00000298139.5p.Arg803Lys  | EARLY |
| CAS-F | RM2 | 8;30974004;G;A  | 0.50 | missense variant | WRN    | .               | probably damaging (0.999) | deleterious (0)    | ENSP00000298139.5p.Arg803Lys  | EARLY |
| CAS-F | RM3 | 8;30974004;G;A  | 0.43 | missense variant | WRN    | .               | probably damaging (0.999) | deleterious (0)    | ENSP00000298139.5p.Arg803Lys  | EARLY |
| CAS-E | P   | 20;30959968;T;C | 0.24 | missense variant | ASXL1  | .               | benign (0.302)            | deleterious (0.01) | ENSP00000364841.1p.Val81Ala   | EARLY |
| CAS-E | DM1 | 7;140453136;A;T | 0.50 | missense variant | BRAF   | 476             | possibly damaging (0.792) | deleterious (0)    | ENSP00000288602.6p.Val600Glu  | EARLY |
| CAS-E | DM2 | 7;140453136;A;T | 0.36 | missense variant | BRAF   | 476             | possibly damaging (0.792) | deleterious (0)    | ENSP00000288602.6p.Val600Glu  | EARLY |
| CAS-E | DM3 | 7;140453136;A;T | 0.34 | missense variant | BRAF   | 476             | possibly damaging (0.792) | deleterious (0)    | ENSP00000288602.6p.Val600Glu  | EARLY |
| CAS-E | DM4 | 7;140453136;A;T | 0.44 | missense variant | BRAF   | 476             | possibly damaging (0.792) | deleterious (0)    | ENSP00000288602.6p.Val600Glu  | EARLY |
| CAS-E | DM5 | 7;140453136;A;T | 0.44 | missense variant | BRAF   | 476             | possibly damaging (0.792) | deleterious (0)    | ENSP00000288602.6p.Val600Glu  | EARLY |
| CAS-E | P   | 7;140453136;A;T | 0.41 | missense variant | BRAF   | 476             | possibly damaging (0.792) | deleterious (0)    | ENSP00000288602.6p.Val600Glu  | EARLY |
| CAS-E | RM  | 7;140453136;A;T | 0.50 | missense variant | BRAF   | 476             | possibly damaging (0.792) | deleterious (0)    | ENSP00000288602.6p.Val600Glu  | EARLY |
| CAS-E | DM1 | 12;48376890;G;A | 0.65 | missense variant | COL2A1 | 1705526,1705527 | unknown (0)               | tolerated (0.1)    | ENSP00000338213.6p.Leu625Phe  | EARLY |
| CAS-E | DM2 | 12;48376890;G;A | 0.58 | missense variant | COL2A1 | 1705526,1705527 | unknown (0)               | tolerated (0.1)    | ENSP00000338213.6p.Leu625Phe  | EARLY |
| CAS-E | DM3 | 12;48376890;G;A | 0.63 | missense variant | COL2A1 | 1705526,1705527 | unknown (0)               | tolerated (0.1)    | ENSP00000338213.6p.Leu625Phe  | EARLY |
| CAS-E | DM4 | 12;48376890;G;A | 0.75 | missense variant | COL2A1 | 1705526,1705527 | unknown (0)               | tolerated (0.1)    | ENSP00000338213.6p.Leu625Phe  | EARLY |
| CAS-E | DM5 | 12;48376890;G;A | 0.67 | missense variant | COL2A1 | 1705526,1705527 | unknown (0)               | tolerated (0.1)    | ENSP00000338213.6p.Leu625Phe  | EARLY |
| CAS-E | P   | 12;48376890;G;A | 0.67 | missense variant | COL2A1 | 1705526,1705527 | unknown (0)               | tolerated (0.1)    | ENSP00000338213.6p.Leu625Phe  | EARLY |
| CAS-E | RM  | 12;48376890;G;A | 0.67 | missense variant | COL2A1 | 1705526,1705527 | unknown (0)               | tolerated (0.1)    | ENSP00000338213.6p.Leu625Phe  | EARLY |
| CAS-E | DM1 | 19;10935754;C;T | 0.35 | stop gained      | DNM2   | .               | .                         | .                  | ENSP00000373905.3p.Gln639Ter  | EARLY |
| CAS-E | DM2 | 19;10935754;C;T | 0.32 | stop gained      | DNM2   | .               | .                         | .                  | ENSP00000373905.3p.Gln639Ter  | EARLY |
| CAS-E | DM3 | 19;10935754;C;T | 0.45 | stop gained      | DNM2   | .               | .                         | .                  | ENSP00000373905.3p.Gln639Ter  | EARLY |
| CAS-E | DM4 | 19;10935754;C;T | 0.87 | stop gained      | DNM2   | .               | .                         | .                  | ENSP00000373905.3p.Gln639Ter  | EARLY |
| CAS-E | DM5 | 19;10935754;C;T | 0.50 | stop gained      | DNM2   | .               | .                         | .                  | ENSP00000373905.3p.Gln639Ter  | EARLY |
| CAS-E | P   | 19;10935754;C;T | 0.39 | stop gained      | DNM2   | .               | .                         | .                  | ENSP00000373905.3p.Gln639Ter  | EARLY |
| CAS-E | RM  | 19;10935754;C;T | 0.45 | stop gained      | DNM2   | .               | .                         | .                  | ENSP00000373905.3p.Gln639Ter  | EARLY |
| CAS-E | DM1 | 7;55223543;C;T  | 0.50 | missense variant | EGFR   | .               | benign (0.103)            | tolerated (1)      | ENSP00000413843.2p.His304Tyr  | EARLY |
| CAS-E | DM2 | 7;55223543;C;T  | 0.41 | missense variant | EGFR   | .               | benign (0.103)            | tolerated (1)      | ENSP00000413843.2p.His304Tyr  | EARLY |
| CAS-E | DM3 | 7;55223543;C;T  | 0.39 | missense variant | EGFR   | .               | benign (0.103)            | tolerated (1)      | ENSP00000413843.2p.His304Tyr  | EARLY |
| CAS-E | DM4 | 7;55223543;C;T  | 0.41 | missense variant | EGFR   | .               | benign (0.103)            | tolerated (1)      | ENSP00000413843.2p.His304Tyr  | EARLY |
| CAS-E | DM5 | 7;55223543;C;T  | 0.39 | missense variant | EGFR   | .               | benign (0.103)            | tolerated (1)      | ENSP00000413843.2p.His304Tyr  | EARLY |
| CAS-E | P   | 7;55223543;C;T  | 0.43 | missense variant | EGFR   | .               | benign (0.103)            | tolerated (1)      | ENSP00000413843.2p.His304Tyr  | EARLY |
| CAS-E | RM  | 7;55223543;C;T  | 0.50 | missense variant | EGFR   | .               | benign (0.103)            | tolerated (1)      | ENSP00000413843.2p.His304Tyr  | EARLY |
| CAS-E | DM1 | 4;126241630;C;T | 0.47 | missense variant | FAT4   | .               | benign (0.297)            | tolerated (0.19)   | ENSP00000377862.3p.Thr1355Ile | EARLY |
| CAS-E | DM2 | 4;126241630;C;T | 0.33 | missense variant | FAT4   | .               | benign (0.297)            | tolerated (0.19)   | ENSP00000377862.3p.Thr1355Ile | EARLY |
| CAS-E | DM3 | 4;126241630;C;T | 0.30 | missense variant | FAT4   | .               | benign (0.297)            | tolerated (0.19)   | ENSP00000377862.3p.Thr1355Ile | EARLY |

|       |     |                 |      |                  |         |     |                           |                    |                                |       |
|-------|-----|-----------------|------|------------------|---------|-----|---------------------------|--------------------|--------------------------------|-------|
| CAS-E | DM4 | 4;126241630;C;T | 0.42 | missense variant | FAT4    | .   | benign (0.297)            | tolerated (0.19)   | ENSP00000377862.3:p.Thr1355Ile | EARLY |
| CAS-E | DM5 | 4;126241630;C;T | 0.34 | missense variant | FAT4    | .   | benign (0.297)            | tolerated (0.19)   | ENSP00000377862.3:p.Thr1355Ile | EARLY |
| CAS-E | P   | 4;126241630;C;T | 0.50 | missense variant | FAT4    | .   | benign (0.297)            | tolerated (0.19)   | ENSP00000377862.3:p.Thr1355Ile | EARLY |
| CAS-E | RM  | 4;126241630;C;T | 0.41 | missense variant | FAT4    | .   | benign (0.297)            | tolerated (0.19)   | ENSP00000377862.3:p.Thr1355Ile | EARLY |
| CAS-E | DM1 | 5;180052998;G;A | 0.35 | missense variant | FLT4    | .   | possibly damaging (0.866) | deleterious (0.04) | ENSP00000377016.3:p.Ser431Phe  | EARLY |
| CAS-E | DM2 | 5;180052998;G;A | 0.39 | missense variant | FLT4    | .   | possibly damaging (0.866) | deleterious (0.04) | ENSP00000377016.3:p.Ser431Phe  | EARLY |
| CAS-E | DM3 | 5;180052998;G;A | 0.21 | missense variant | FLT4    | .   | possibly damaging (0.866) | deleterious (0.04) | ENSP00000377016.3:p.Ser431Phe  | EARLY |
| CAS-E | DM4 | 5;180052998;G;A | 0.67 | missense variant | FLT4    | .   | possibly damaging (0.866) | deleterious (0.04) | ENSP00000377016.3:p.Ser431Phe  | EARLY |
| CAS-E | DM5 | 5;180052998;G;A | 0.30 | missense variant | FLT4    | .   | possibly damaging (0.866) | deleterious (0.04) | ENSP00000377016.3:p.Ser431Phe  | EARLY |
| CAS-E | P   | 5;180052998;G;A | 0.35 | missense variant | FLT4    | .   | possibly damaging (0.866) | deleterious (0.04) | ENSP00000377016.3:p.Ser431Phe  | EARLY |
| CAS-E | RM  | 5;180052998;G;A | 0.17 | missense variant | FLT4    | .   | possibly damaging (0.866) | deleterious (0.04) | ENSP00000377016.3:p.Ser431Phe  | EARLY |
| CAS-E | DM1 | 16;9857436;C;T  | 0.25 | missense variant | GRIN2 A | .   | benign (0.005)            | tolerated (0.52)   | ENSP00000379820.2:p.Gly1322Glu | EARLY |
| CAS-E | DM3 | 16;9857436;C;T  | 0.32 | missense variant | GRIN2 A | .   | benign (0.005)            | tolerated (0.52)   | ENSP00000379820.2:p.Gly1322Glu | EARLY |
| CAS-E | DM4 | 16;9857436;C;T  | 0.43 | missense variant | GRIN2 A | .   | benign (0.005)            | tolerated (0.52)   | ENSP00000379820.2:p.Gly1322Glu | EARLY |
| CAS-E | DM5 | 16;9857436;C;T  | 0.40 | missense variant | GRIN2 A | .   | benign (0.005)            | tolerated (0.52)   | ENSP00000379820.2:p.Gly1322Glu | EARLY |
| CAS-E | P   | 16;9857436;C;T  | 0.36 | missense variant | GRIN2 A | .   | benign (0.005)            | tolerated (0.52)   | ENSP00000379820.2:p.Gly1322Glu | EARLY |
| CAS-E | RM  | 16;9857436;C;T  | 0.41 | missense variant | GRIN2 A | .   | benign (0.005)            | tolerated (0.52)   | ENSP00000379820.2:p.Gly1322Glu | EARLY |
| CAS-E | DM1 | 12;49445638;G;A | 0.66 | missense variant | KMT2 D  | .   | unknown (0)               | .                  | ENSP00000301067.7:p.Pro610Ser  | EARLY |
| CAS-E | DM2 | 12;49445638;G;A | 0.67 | missense variant | KMT2 D  | .   | unknown (0)               | .                  | ENSP00000301067.7:p.Pro610Ser  | EARLY |
| CAS-E | DM3 | 12;49445638;G;A | 0.63 | missense variant | KMT2 D  | .   | unknown (0)               | .                  | ENSP00000301067.7:p.Pro610Ser  | EARLY |
| CAS-E | DM4 | 12;49445638;G;A | 0.69 | missense variant | KMT2 D  | .   | unknown (0)               | .                  | ENSP00000301067.7:p.Pro610Ser  | EARLY |
| CAS-E | DM5 | 12;49445638;G;A | 0.67 | missense variant | KMT2 D  | .   | unknown (0)               | .                  | ENSP00000301067.7:p.Pro610Ser  | EARLY |
| CAS-E | P   | 12;49445638;G;A | 0.67 | missense variant | KMT2 D  | .   | unknown (0)               | .                  | ENSP00000301067.7:p.Pro610Ser  | EARLY |
| CAS-E | RM  | 12;49445638;G;A | 0.67 | missense variant | KMT2 D  | .   | unknown (0)               | .                  | ENSP00000301067.7:p.Pro610Ser  | EARLY |
| CAS-E | DM1 | 20;50140259;G;A | 0.50 | missense variant | NFATC 2 | .   | probably damaging (0.999) | tolerated (1)      | ENSP00000396471.1:p.Ser154Phe  | EARLY |
| CAS-E | DM2 | 20;50140259;G;A | 0.50 | missense variant | NFATC 2 | .   | probably damaging (0.999) | tolerated (1)      | ENSP00000396471.1:p.Ser154Phe  | EARLY |
| CAS-E | DM3 | 20;50140259;G;A | 0.49 | missense variant | NFATC 2 | .   | probably damaging (0.999) | tolerated (1)      | ENSP00000396471.1:p.Ser154Phe  | EARLY |
| CAS-E | DM4 | 20;50140259;G;A | 0.50 | missense variant | NFATC 2 | .   | probably damaging (0.999) | tolerated (1)      | ENSP00000396471.1:p.Ser154Phe  | EARLY |
| CAS-E | DM5 | 20;50140259;G;A | 0.49 | missense variant | NFATC 2 | .   | probably damaging (0.999) | tolerated (1)      | ENSP00000396471.1:p.Ser154Phe  | EARLY |
| CAS-E | P   | 20;50140259;G;A | 0.50 | missense variant | NFATC 2 | .   | probably damaging (0.999) | tolerated (1)      | ENSP00000396471.1:p.Ser154Phe  | EARLY |
| CAS-E | RM  | 20;50140259;G;A | 0.50 | missense variant | NFATC 2 | .   | probably damaging (0.999) | tolerated (1)      | ENSP00000396471.1:p.Ser154Phe  | EARLY |
| CAS-E | DM2 | 1;115256530;G;T | 0.20 | missense variant | NRAS    | 580 | benign (0.045)            | deleterious (0.01) | ENSP00000358548.4:p.Gln61Lys   | LATE  |
| CAS-E | DM3 | 1;115256530;G;T | 0.13 | missense variant | NRAS    | 580 | benign (0.045)            | deleterious (0.01) | ENSP00000358548.4:p.Gln61Lys   | LATE  |
| CAS-E | DM5 | 1;115256530;G;T | 0.15 | missense variant | NRAS    | 580 | benign (0.045)            | deleterious (0.01) | ENSP00000358548.4:p.Gln61Lys   | LATE  |
| CAS-E | DM1 | 16;23641109;A;G | 0.66 | missense variant | PALB2   | .   | benign (0.126)            | deleterious (0.01) | ENSP00000261584.4:p.Leu789Pro  | EARLY |
| CAS-E | DM2 | 16;23641109;A;G | 0.98 | missense variant | PALB2   | .   | benign (0.126)            | deleterious (0.01) | ENSP00000261584.4:p.Leu789Pro  | EARLY |
| CAS-E | DM3 | 16;23641109;A;G | 0.67 | missense variant | PALB2   | .   | benign (0.126)            | deleterious (0.01) | ENSP00000261584.4:p.Leu789Pro  | EARLY |
| CAS-E | DM4 | 16;23641109;A;G | 0.50 | missense variant | PALB2   | .   | benign (0.126)            | deleterious (0.01) | ENSP00000261584.4:p.Leu789Pro  | EARLY |
| CAS-E | DM5 | 16;23641109;A;G | 0.50 | missense variant | PALB2   | .   | benign (0.126)            | deleterious (0.01) | ENSP00000261584.4:p.Leu789Pro  | EARLY |

|       |     |                 |      |                  |        |               |                           |                    |                                |       |
|-------|-----|-----------------|------|------------------|--------|---------------|---------------------------|--------------------|--------------------------------|-------|
| CAS-E | P   | 16;23641109;A;G | 0.50 | missense variant | PALB2  | .             | benign (0.126)            | deleterious (0.01) | ENSP00000261584.4;p.Leu789Pro  | EARLY |
| CAS-E | RM  | 16;23641109;A;G | 0.50 | missense variant | PALB2  | .             | benign (0.126)            | deleterious (0.01) | ENSP00000261584.4;p.Leu789Pro  | EARLY |
| CAS-E | DM1 | 9;127920559;G;A | 0.58 | missense variant | PPP6C  | 23144,1167934 | benign (0.117)            | deleterious (0.02) | ENSP00000392147.1;p.His151Tyr  | EARLY |
| CAS-E | DM2 | 9;127920559;G;A | 0.89 | missense variant | PPP6C  | 23144,1167934 | benign (0.117)            | deleterious (0.02) | ENSP00000392147.1;p.His151Tyr  | EARLY |
| CAS-E | DM3 | 9;127920559;G;A | 0.63 | missense variant | PPP6C  | 23144,1167934 | benign (0.117)            | deleterious (0.02) | ENSP00000392147.1;p.His151Tyr  | EARLY |
| CAS-E | DM4 | 9;127920559;G;A | 1.00 | missense variant | PPP6C  | 23144,1167934 | benign (0.117)            | deleterious (0.02) | ENSP00000392147.1;p.His151Tyr  | EARLY |
| CAS-E | DM5 | 9;127920559;G;A | 0.86 | missense variant | PPP6C  | 23144,1167934 | benign (0.117)            | deleterious (0.02) | ENSP00000392147.1;p.His151Tyr  | EARLY |
| CAS-E | P   | 9;127920559;G;A | 0.56 | missense variant | PPP6C  | 23144,1167934 | benign (0.117)            | deleterious (0.02) | ENSP00000392147.1;p.His151Tyr  | EARLY |
| CAS-E | RM  | 9;127920559;G;A | 0.65 | missense variant | PPP6C  | 23144,1167934 | benign (0.117)            | deleterious (0.02) | ENSP00000392147.1;p.His151Tyr  | EARLY |
| CAS-E | DM1 | 2;214239772;C;T | 0.67 | missense variant | SPAG16 | .             | benign (0.214)            | tolerated (0.2)    | ENSP00000332592.5;p.Pro291Ser  | EARLY |
| CAS-E | DM2 | 2;214239772;C;T | 0.43 | missense variant | SPAG16 | .             | benign (0.214)            | tolerated (0.2)    | ENSP00000332592.5;p.Pro291Ser  | EARLY |
| CAS-E | DM3 | 2;214239772;C;T | 0.48 | missense variant | SPAG16 | .             | benign (0.214)            | tolerated (0.2)    | ENSP00000332592.5;p.Pro291Ser  | EARLY |
| CAS-E | DM4 | 2;214239772;C;T | 0.50 | missense variant | SPAG16 | .             | benign (0.214)            | tolerated (0.2)    | ENSP00000332592.5;p.Pro291Ser  | EARLY |
| CAS-E | DM5 | 2;214239772;C;T | 0.34 | missense variant | SPAG16 | .             | benign (0.214)            | tolerated (0.2)    | ENSP00000332592.5;p.Pro291Ser  | EARLY |
| CAS-E | P   | 2;214239772;C;T | 0.24 | missense variant | SPAG16 | .             | benign (0.214)            | tolerated (0.2)    | ENSP00000332592.5;p.Pro291Ser  | EARLY |
| CAS-E | RM  | 2;214239772;C;T | 0.67 | missense variant | SPAG16 | .             | benign (0.214)            | tolerated (0.2)    | ENSP00000332592.5;p.Pro291Ser  | EARLY |
| CAS-E | DM1 | 17;7578472;G;A  | 0.28 | missense variant | TP53   | 44367         | benign (0.014)            | tolerated (0.21)   | ENSP00000398846.2;p.Pro153Leu  | EARLY |
| CAS-E | DM2 | 17;7578472;G;A  | 0.40 | missense variant | TP53   | 44367         | benign (0.014)            | tolerated (0.21)   | ENSP00000398846.2;p.Pro153Leu  | EARLY |
| CAS-E | DM3 | 17;7578472;G;A  | 0.31 | missense variant | TP53   | 44367         | benign (0.014)            | tolerated (0.21)   | ENSP00000398846.2;p.Pro153Leu  | EARLY |
| CAS-E | DM5 | 17;7578472;G;A  | 0.31 | missense variant | TP53   | 44367         | benign (0.014)            | tolerated (0.21)   | ENSP00000398846.2;p.Pro153Leu  | EARLY |
| CAS-E | P   | 17;7578472;G;A  | 0.35 | missense variant | TP53   | 44367         | benign (0.014)            | tolerated (0.21)   | ENSP00000398846.2;p.Pro153Leu  | EARLY |
| CAS-E | RM  | 17;7578472;G;A  | 0.39 | missense variant | TP53   | 44367         | benign (0.014)            | tolerated (0.21)   | ENSP00000398846.2;p.Pro153Leu  | EARLY |
| CAS-E | DM1 | 16;2134253;G;A  | 0.67 | missense variant | TSC2   | .             | probably damaging (0.977) | tolerated (0.14)   | ENSP00000371978.6;p.Glu1229Lys | EARLY |
| CAS-E | DM2 | 16;2134253;G;A  | 1.00 | missense variant | TSC2   | .             | probably damaging (0.977) | tolerated (0.14)   | ENSP00000371978.6;p.Glu1229Lys | EARLY |
| CAS-E | DM3 | 16;2134253;G;A  | 0.62 | missense variant | TSC2   | .             | probably damaging (0.977) | tolerated (0.14)   | ENSP00000371978.6;p.Glu1229Lys | EARLY |
| CAS-E | DM4 | 16;2134253;G;A  | 1.00 | missense variant | TSC2   | .             | probably damaging (0.977) | tolerated (0.14)   | ENSP00000371978.6;p.Glu1229Lys | EARLY |
| CAS-E | DM5 | 16;2134253;G;A  | 0.50 | missense variant | TSC2   | .             | probably damaging (0.977) | tolerated (0.14)   | ENSP00000371978.6;p.Glu1229Lys | EARLY |
| CAS-E | P   | 16;2134253;G;A  | 0.50 | missense variant | TSC2   | .             | probably damaging (0.977) | tolerated (0.14)   | ENSP00000371978.6;p.Glu1229Lys | EARLY |
| CAS-E | RM  | 16;2134253;G;A  | 0.41 | missense variant | TSC2   | .             | probably damaging (0.977) | tolerated (0.14)   | ENSP00000371978.6;p.Glu1229Lys | EARLY |
| CAS-A | DM1 | 5;112173567;C;T | 0.55 | missense variant | APC    | .             | probably damaging (0.999) | deleterious (0)    | ENSP00000423828.2;p.Ala759Val  | EARLY |
| CAS-A | DM2 | 5;112173567;C;T | 0.50 | missense variant | APC    | .             | probably damaging (0.999) | deleterious (0)    | ENSP00000423828.2;p.Ala759Val  | EARLY |
| CAS-A | DM3 | 5;112173567;C;T | 0.75 | missense variant | APC    | .             | probably damaging (0.999) | deleterious (0)    | ENSP00000423828.2;p.Ala759Val  | EARLY |
| CAS-A | DM4 | 5;112173567;C;T | 0.45 | missense variant | APC    | .             | probably damaging (0.999) | deleterious (0)    | ENSP00000423828.2;p.Ala759Val  | EARLY |
| CAS-A | RM1 | 5;112173567;C;T | 0.40 | missense variant | APC    | .             | probably damaging (0.999) | deleterious (0)    | ENSP00000423828.2;p.Ala759Val  | EARLY |
| CAS-A | RM2 | 5;112173567;C;T | 0.34 | missense variant | APC    | .             | probably damaging (0.999) | deleterious (0)    | ENSP00000423828.2;p.Ala759Val  | EARLY |
| CAS-A | RM3 | 5;112173567;C;T | 0.47 | missense variant | APC    | .             | probably damaging (0.999) | deleterious (0)    | ENSP00000423828.2;p.Ala759Val  | EARLY |
| CAS-A | DM1 | 7;140453136;A;T | 0.51 | missense variant | BRAF   | 476           | possibly damaging (0.792) | deleterious (0)    | ENSP00000288602.6;p.Val600Glu  | EARLY |
| CAS-A | DM2 | 7;140453136;A;T | 0.67 | missense variant | BRAF   | 476           | possibly damaging (0.792) | deleterious (0)    | ENSP00000288602.6;p.Val600Glu  | EARLY |

|       |     |                 |      |                         |         |               |                           |                    |                                |       |
|-------|-----|-----------------|------|-------------------------|---------|---------------|---------------------------|--------------------|--------------------------------|-------|
| CAS-A | DM3 | 7;140453136;A;T | 0.60 | missense variant        | BRAF    | 476           | possibly damaging (0.792) | deleterious (0)    | ENSP00000288602.6;p.Val600Glu  | EARLY |
| CAS-A | DM4 | 7;140453136;A;T | 0.67 | missense variant        | BRAF    | 476           | possibly damaging (0.792) | deleterious (0)    | ENSP00000288602.6;p.Val600Glu  | EARLY |
| CAS-A | RM1 | 7;140453136;A;T | 0.79 | missense variant        | BRAF    | 476           | possibly damaging (0.792) | deleterious (0)    | ENSP00000288602.6;p.Val600Glu  | EARLY |
| CAS-A | RM2 | 7;140453136;A;T | 0.73 | missense variant        | BRAF    | 476           | possibly damaging (0.792) | deleterious (0)    | ENSP00000288602.6;p.Val600Glu  | EARLY |
| CAS-A | RM3 | 7;140453136;A;T | 0.83 | missense variant        | BRAF    | 476           | possibly damaging (0.792) | deleterious (0)    | ENSP00000288602.6;p.Val600Glu  | EARLY |
| CAS-A | DM1 | 14;95578562;C;A | 0.36 | missense variant        | DICER1  | .             | possibly damaging (0.703) | tolerated (0.44)   | ENSP00000435681.1;p.Arg688Leu  | LATE  |
| CAS-A | DM1 | 16;9858331;C;T  | 0.49 | missense variant        | GRIN2A  | .             | benign (0.003)            | tolerated (0.79)   | ENSP00000454998.1;p.Asp1024Asn | EARLY |
| CAS-A | DM2 | 16;9858331;C;T  | 0.41 | missense variant        | GRIN2A  | .             | benign (0.003)            | tolerated (0.79)   | ENSP00000454998.1;p.Asp1024Asn | EARLY |
| CAS-A | DM3 | 16;9858331;C;T  | 0.38 | missense variant        | GRIN2A  | .             | benign (0.003)            | tolerated (0.79)   | ENSP00000454998.1;p.Asp1024Asn | EARLY |
| CAS-A | DM4 | 16;9858331;C;T  | 0.50 | missense variant        | GRIN2A  | .             | benign (0.003)            | tolerated (0.79)   | ENSP00000454998.1;p.Asp1024Asn | EARLY |
| CAS-A | RM1 | 16;9858331;C;T  | 0.50 | missense variant        | GRIN2A  | .             | benign (0.003)            | tolerated (0.79)   | ENSP00000454998.1;p.Asp1024Asn | EARLY |
| CAS-A | RM2 | 16;9858331;C;T  | 0.50 | missense variant        | GRIN2A  | .             | benign (0.003)            | tolerated (0.79)   | ENSP00000454998.1;p.Asp1024Asn | EARLY |
| CAS-A | RM3 | 16;9858331;C;T  | 0.54 | missense variant        | GRIN2A  | .             | benign (0.003)            | tolerated (0.79)   | ENSP00000454998.1;p.Asp1024Asn | EARLY |
| CAS-A | RM1 | 7;151927021;C;A | 0.40 | missense variant        | KMT2C   | 150426,150427 | probably damaging (1)     | deleterious (0)    | ENSP00000262189.6;p.Cys988Phe  | EARLY |
| CAS-A | RM2 | 7;151927021;C;A | 0.30 | missense variant        | KMT2C   | 150426,150427 | probably damaging (1)     | deleterious (0)    | ENSP00000262189.6;p.Cys988Phe  | EARLY |
| CAS-A | RM3 | 7;151927021;C;A | 0.21 | missense variant        | KMT2C   | 150426,150427 | probably damaging (1)     | deleterious (0)    | ENSP00000262189.6;p.Cys988Phe  | EARLY |
| CAS-A | DM2 | 7;151927021;C;A | 0.11 | missense variant        | KMT2C   | 150426,150427 | probably damaging (1)     | deleterious (0)    | ENSP00000262189.6;p.Cys988Phe  | EARLY |
| CAS-A | DM3 | 7;151927021;C;A | 0.07 | missense variant        | KMT2C   | 150426,150427 | probably damaging (1)     | deleterious (0)    | ENSP00000262189.6;p.Cys988Phe  | EARLY |
| CAS-A | DM1 | 1;115256530;G;T | 0.81 | missense variant        | NRAS    | 580           | benign (0.045)            | deleterious (0.01) | ENSP00000358548.4;p.Gln61Lys   | LATE  |
| CAS-A | DM2 | 1;115256530;G;T | 0.75 | missense variant        | NRAS    | 580           | benign (0.045)            | deleterious (0.01) | ENSP00000358548.4;p.Gln61Lys   | LATE  |
| CAS-A | DM3 | 1;115256530;G;T | 0.23 | missense variant        | NRAS    | 580           | benign (0.045)            | deleterious (0.01) | ENSP00000358548.4;p.Gln61Lys   | LATE  |
| CAS-A | DM4 | 1;115256530;G;T | 0.74 | missense variant        | NRAS    | 580           | benign (0.045)            | deleterious (0.01) | ENSP00000358548.4;p.Gln61Lys   | LATE  |
| CAS-A | DM1 | 3;178936094;C;A | 0.52 | missense variant        | PIK3CA  | 766,255876    | probably damaging (0.952) | tolerated (0.23)   | ENSP00000263967.3;p.Gln546Lys  | EARLY |
| CAS-A | DM2 | 3;178936094;C;A | 0.19 | missense variant        | PIK3CA  | 766,255876    | probably damaging (0.952) | tolerated (0.23)   | ENSP00000263967.3;p.Gln546Lys  | EARLY |
| CAS-A | DM3 | 3;178936094;C;A | 0.16 | missense variant        | PIK3CA  | 766,255876    | probably damaging (0.952) | tolerated (0.23)   | ENSP00000263967.3;p.Gln546Lys  | EARLY |
| CAS-A | DM4 | 3;178936094;C;A | 0.44 | missense variant        | PIK3CA  | 766,255876    | probably damaging (0.952) | tolerated (0.23)   | ENSP00000263967.3;p.Gln546Lys  | EARLY |
| CAS-A | RM2 | 3;178936094;C;A | 0.19 | missense variant        | PIK3CA  | 766,255876    | probably damaging (0.952) | tolerated (0.23)   | ENSP00000263967.3;p.Gln546Lys  | EARLY |
| CAS-A | DM1 | 12;47186852;C;T | 0.45 | initiator codon variant | SLC38A4 | .             | benign (0.104)            | tolerated (0.06)   | ENSP00000389843.1;p.Met1?      | EARLY |
| CAS-A | DM2 | 12;47186852;C;T | 0.50 | initiator codon variant | SLC38A4 | .             | benign (0.104)            | tolerated (0.06)   | ENSP00000389843.1;p.Met1?      | EARLY |
| CAS-A | DM3 | 12;47186852;C;T | 0.50 | initiator codon variant | SLC38A4 | .             | benign (0.104)            | tolerated (0.06)   | ENSP00000389843.1;p.Met1?      | EARLY |
| CAS-A | DM4 | 12;47186852;C;T | 0.50 | initiator codon variant | SLC38A4 | .             | benign (0.104)            | tolerated (0.06)   | ENSP00000389843.1;p.Met1?      | EARLY |
| CAS-A | RM1 | 12;47186852;C;T | 0.36 | initiator codon variant | SLC38A4 | .             | benign (0.104)            | tolerated (0.06)   | ENSP00000389843.1;p.Met1?      | EARLY |
| CAS-A | RM2 | 12;47186852;C;T | 0.45 | initiator codon variant | SLC38A4 | .             | benign (0.104)            | tolerated (0.06)   | ENSP00000389843.1;p.Met1?      | EARLY |
| CAS-A | RM3 | 12;47186852;C;T | 0.50 | initiator codon variant | SLC38A4 | .             | benign (0.104)            | tolerated (0.06)   | ENSP00000389843.1;p.Met1?      | EARLY |
| CAS-A | DM1 | 10;70332519;T;C | 0.34 | missense variant        | TET1    | .             | benign (0.003)            | tolerated (0.51)   | ENSP00000362748.4;p.Tyr142His  | LATE  |
| CAS-A | DM1 | 10;70406105;C;T | 0.93 | missense variant        | TET1    | .             | probably damaging (0.931) | deleterious (0.01) | ENSP00000362748.4;p.Pro1207Ser | EARLY |
| CAS-A | DM2 | 10;70406105;C;T | 1.00 | missense variant        | TET1    | .             | probably damaging (0.931) | deleterious (0.01) | ENSP00000362748.4;p.Pro1207Ser | EARLY |
| CAS-A | DM3 | 10;70406105;C;T | 0.81 | missense variant        | TET1    | .             | probably damaging (0.931) | deleterious (0.01) | ENSP00000362748.4;p.Pro1207Ser | EARLY |
| CAS-A | DM4 | 10;70406105;C;T | 0.91 | missense variant        | TET1    | .             | probably damaging (0.931) | deleterious (0.01) | ENSP00000362748.4;p.Pro1207Ser | EARLY |



|       |     |                 |      |                  |       |     |                           |                    |                                |       |
|-------|-----|-----------------|------|------------------|-------|-----|---------------------------|--------------------|--------------------------------|-------|
| CAS-A | RM1 | 10;70406105;C;T | 1.00 | missense variant | TET1  | .   | probably damaging (0.931) | deleterious (0.01) | ENSP00000362748.4.p.Pro1207Ser | EARLY |
| CAS-A | RM2 | 10;70406105;C;T | 0.85 | missense variant | TET1  | .   | probably damaging (0.931) | deleterious (0.01) | ENSP00000362748.4.p.Pro1207Ser | EARLY |
| CAS-A | RM3 | 10;70406105;C;T | 1.00 | missense variant | TET1  | .   | probably damaging (0.931) | deleterious (0.01) | ENSP00000362748.4.p.Pro1207Ser | EARLY |
| CAS-A | DM1 | 8;30982117;C;T  | 0.50 | missense variant | WRN   | .   | benign (0.003)            | tolerated (0.17)   | ENSP00000298139.5.p.His904Tyr  | EARLY |
| CAS-A | DM2 | 8;30982117;C;T  | 0.50 | missense variant | WRN   | .   | benign (0.003)            | tolerated (0.17)   | ENSP00000298139.5.p.His904Tyr  | EARLY |
| CAS-A | DM3 | 8;30982117;C;T  | 0.65 | missense variant | WRN   | .   | benign (0.003)            | tolerated (0.17)   | ENSP00000298139.5.p.His904Tyr  | EARLY |
| CAS-A | DM4 | 8;30982117;C;T  | 0.50 | missense variant | WRN   | .   | benign (0.003)            | tolerated (0.17)   | ENSP00000298139.5.p.His904Tyr  | EARLY |
| CAS-A | RM1 | 8;30982117;C;T  | 0.44 | missense variant | WRN   | .   | benign (0.003)            | tolerated (0.17)   | ENSP00000298139.5.p.His904Tyr  | EARLY |
| CAS-A | RM2 | 8;30982117;C;T  | 0.49 | missense variant | WRN   | .   | benign (0.003)            | tolerated (0.17)   | ENSP00000298139.5.p.His904Tyr  | EARLY |
| CAS-A | RM3 | 8;30982117;C;T  | 0.36 | missense variant | WRN   | .   | benign (0.003)            | tolerated (0.17)   | ENSP00000298139.5.p.His904Tyr  | EARLY |
| CAS-B | DM1 | 7;140453136;A;T | 0.67 | missense variant | BRAF  | 476 | possibly damaging (0.792) | deleterious (0)    | ENSP00000288602.6.p.Val600Glu  | EARLY |
| CAS-B | DM2 | 7;140453136;A;T | 0.71 | missense variant | BRAF  | 476 | possibly damaging (0.792) | deleterious (0)    | ENSP00000288602.6.p.Val600Glu  | EARLY |
| CAS-B | DM3 | 7;140453136;A;T | 0.61 | missense variant | BRAF  | 476 | possibly damaging (0.792) | deleterious (0)    | ENSP00000288602.6.p.Val600Glu  | EARLY |
| CAS-B | DM4 | 7;140453136;A;T | 0.61 | missense variant | BRAF  | 476 | possibly damaging (0.792) | deleterious (0)    | ENSP00000288602.6.p.Val600Glu  | EARLY |
| CAS-B | DM5 | 7;140453136;A;T | 0.68 | missense variant | BRAF  | 476 | possibly damaging (0.792) | deleterious (0)    | ENSP00000288602.6.p.Val600Glu  | EARLY |
| CAS-B | P   | 7;140453136;A;T | 0.66 | missense variant | BRAF  | 476 | possibly damaging (0.792) | deleterious (0)    | ENSP00000288602.6.p.Val600Glu  | EARLY |
| CAS-B | RM1 | 7;140453136;A;T | 0.67 | missense variant | BRAF  | 476 | possibly damaging (0.792) | deleterious (0)    | ENSP00000288602.6.p.Val600Glu  | EARLY |
| CAS-B | RM2 | 7;140453136;A;T | 0.66 | missense variant | BRAF  | 476 | possibly damaging (0.792) | deleterious (0)    | ENSP00000288602.6.p.Val600Glu  | EARLY |
| CAS-B | RM3 | 7;140453136;A;T | 0.66 | missense variant | BRAF  | 476 | possibly damaging (0.792) | deleterious (0)    | ENSP00000288602.6.p.Val600Glu  | EARLY |
| CAS-B | DM1 | 1;36933492;G;A  | 0.64 | missense variant | CSF3R | .   | benign (0.119)            | tolerated (0.39)   | ENSP00000355406.4.p.His599Tyr  | EARLY |
| CAS-B | DM2 | 1;36933492;G;A  | 0.55 | missense variant | CSF3R | .   | benign (0.119)            | tolerated (0.39)   | ENSP00000355406.4.p.His599Tyr  | EARLY |
| CAS-B | DM3 | 1;36933492;G;A  | 0.63 | missense variant | CSF3R | .   | benign (0.119)            | tolerated (0.39)   | ENSP00000355406.4.p.His599Tyr  | EARLY |
| CAS-B | DM4 | 1;36933492;G;A  | 0.47 | missense variant | CSF3R | .   | benign (0.119)            | tolerated (0.39)   | ENSP00000355406.4.p.His599Tyr  | EARLY |
| CAS-B | DM5 | 1;36933492;G;A  | 0.67 | missense variant | CSF3R | .   | benign (0.119)            | tolerated (0.39)   | ENSP00000355406.4.p.His599Tyr  | EARLY |
| CAS-B | P   | 1;36933492;G;A  | 0.38 | missense variant | CSF3R | .   | benign (0.119)            | tolerated (0.39)   | ENSP00000355406.4.p.His599Tyr  | EARLY |
| CAS-B | RM1 | 1;36933492;G;A  | 0.44 | missense variant | CSF3R | .   | benign (0.119)            | tolerated (0.39)   | ENSP00000355406.4.p.His599Tyr  | EARLY |
| CAS-B | RM2 | 1;36933492;G;A  | 0.50 | missense variant | CSF3R | .   | benign (0.119)            | tolerated (0.39)   | ENSP00000355406.4.p.His599Tyr  | EARLY |
| CAS-B | RM3 | 1;36933492;G;A  | 0.49 | missense variant | CSF3R | .   | benign (0.119)            | tolerated (0.39)   | ENSP00000355406.4.p.His599Tyr  | EARLY |
| CAS-B | DM1 | 7;151874960;T;G | 0.27 | missense variant | KMT2C | .   | possibly damaging (0.714) | tolerated (0.12)   | ENSP00000262189.6.p.Leu2526Phe | EARLY |
| CAS-B | DM2 | 7;151874960;T;G | 0.35 | missense variant | KMT2C | .   | possibly damaging (0.714) | tolerated (0.12)   | ENSP00000262189.6.p.Leu2526Phe | EARLY |
| CAS-B | DM3 | 7;151874960;T;G | 0.28 | missense variant | KMT2C | .   | possibly damaging (0.714) | tolerated (0.12)   | ENSP00000262189.6.p.Leu2526Phe | EARLY |
| CAS-B | DM4 | 7;151874960;T;G | 0.32 | missense variant | KMT2C | .   | possibly damaging (0.714) | tolerated (0.12)   | ENSP00000262189.6.p.Leu2526Phe | EARLY |
| CAS-B | DM5 | 7;151874960;T;G | 0.32 | missense variant | KMT2C | .   | possibly damaging (0.714) | tolerated (0.12)   | ENSP00000262189.6.p.Leu2526Phe | EARLY |
| CAS-B | P   | 7;151874960;T;G | 0.34 | missense variant | KMT2C | .   | possibly damaging (0.714) | tolerated (0.12)   | ENSP00000262189.6.p.Leu2526Phe | EARLY |
| CAS-B | RM1 | 7;151874960;T;G | 0.36 | missense variant | KMT2C | .   | possibly damaging (0.714) | tolerated (0.12)   | ENSP00000262189.6.p.Leu2526Phe | EARLY |
| CAS-B | RM2 | 7;151874960;T;G | 0.35 | missense variant | KMT2C | .   | possibly damaging (0.714) | tolerated (0.12)   | ENSP00000262189.6.p.Leu2526Phe | EARLY |
| CAS-B | RM3 | 7;151874960;T;G | 0.29 | missense variant | KMT2C | .   | possibly damaging (0.714) | tolerated (0.12)   | ENSP00000262189.6.p.Leu2526Phe | EARLY |

|       |     |                 |      |                  |        |             |                           |                    |                                |       |
|-------|-----|-----------------|------|------------------|--------|-------------|---------------------------|--------------------|--------------------------------|-------|
| CAS-B | DM5 | 1;198678842;A;T | 0.22 | missense variant | PTPRC  | .           | benign (0.02)             | tolerated (0.29)   | ENSP00000356337.5;p.Ile288Phe  | LATE  |
| CAS-B | DM1 | 17;7574003;G;A  | 0.99 | stop gained      | TP53   | 11073,99721 | .                         | .                  | ENSP00000391478.2;p.Arg342Ter  | EARLY |
| CAS-B | DM2 | 17;7574003;G;A  | 1.00 | stop gained      | TP53   | 11073,99721 | .                         | .                  | ENSP00000391478.2;p.Arg342Ter  | EARLY |
| CAS-B | DM3 | 17;7574003;G;A  | 1.00 | stop gained      | TP53   | 11073,99721 | .                         | .                  | ENSP00000391478.2;p.Arg342Ter  | EARLY |
| CAS-B | DM4 | 17;7574003;G;A  | 0.65 | stop gained      | TP53   | 11073,99721 | .                         | .                  | ENSP00000391478.2;p.Arg342Ter  | EARLY |
| CAS-B | DM5 | 17;7574003;G;A  | 0.89 | stop gained      | TP53   | 11073,99721 | .                         | .                  | ENSP00000391478.2;p.Arg342Ter  | EARLY |
| CAS-B | P   | 17;7574003;G;A  | 1.00 | stop gained      | TP53   | 11073,99721 | .                         | .                  | ENSP00000391478.2;p.Arg342Ter  | EARLY |
| CAS-B | RM1 | 17;7574003;G;A  | 0.90 | stop gained      | TP53   | 11073,99721 | .                         | .                  | ENSP00000391478.2;p.Arg342Ter  | EARLY |
| CAS-B | RM2 | 17;7574003;G;A  | 0.71 | stop gained      | TP53   | 11073,99721 | .                         | .                  | ENSP00000391478.2;p.Arg342Ter  | EARLY |
| CAS-B | RM3 | 17;7574003;G;A  | 0.84 | stop gained      | TP53   | 11073,99721 | .                         | .                  | ENSP00000391478.2;p.Arg342Ter  | EARLY |
| CAS-B | DM1 | 17;5036838;G;A  | 0.23 | missense variant | USP6   | .           | benign (0)                | tolerated (1)      | ENSP00000328010.4;p.Arg126Lys  | EARLY |
| CAS-B | DM2 | 17;5036838;G;A  | 0.05 | missense variant | USP6   | .           | benign (0)                | tolerated (1)      | ENSP00000328010.4;p.Arg126Lys  | EARLY |
| CAS-B | DM3 | 17;5036838;G;A  | 0.14 | missense variant | USP6   | .           | benign (0)                | tolerated (1)      | ENSP00000328010.4;p.Arg126Lys  | EARLY |
| CAS-B | DM4 | 17;5036838;G;A  | 0.73 | missense variant | USP6   | .           | benign (0)                | tolerated (1)      | ENSP00000328010.4;p.Arg126Lys  | EARLY |
| CAS-B | DM5 | 17;5036838;G;A  | 0.16 | missense variant | USP6   | .           | benign (0)                | tolerated (1)      | ENSP00000328010.4;p.Arg126Lys  | EARLY |
| CAS-B | P   | 17;5036838;G;A  | 0.49 | missense variant | USP6   | .           | benign (0)                | tolerated (1)      | ENSP00000328010.4;p.Arg126Lys  | EARLY |
| CAS-B | RM1 | 17;5036838;G;A  | 0.33 | missense variant | USP6   | .           | benign (0)                | tolerated (1)      | ENSP00000328010.4;p.Arg126Lys  | EARLY |
| CAS-B | RM2 | 17;5036838;G;A  | 0.29 | missense variant | USP6   | .           | benign (0)                | tolerated (1)      | ENSP00000328010.4;p.Arg126Lys  | EARLY |
| CAS-B | RM3 | 17;5036838;G;A  | 0.22 | missense variant | USP6   | .           | benign (0)                | tolerated (1)      | ENSP00000328010.4;p.Arg126Lys  | EARLY |
| CAS-C | DM1 | 7;140453134;T;C | 0.89 | missense variant | BRAF   | 478         | benign (0.195)            | deleterious (0)    | ENSP00000288602.6;p.Lys601Glu  | EARLY |
| CAS-C | DM2 | 7;140453134;T;C | 0.77 | missense variant | BRAF   | 478         | benign (0.195)            | deleterious (0)    | ENSP00000288602.6;p.Lys601Glu  | EARLY |
| CAS-C | DM3 | 7;140453134;T;C | 0.86 | missense variant | BRAF   | 478         | benign (0.195)            | deleterious (0)    | ENSP00000288602.6;p.Lys601Glu  | EARLY |
| CAS-C | DM4 | 7;140453134;T;C | 0.86 | missense variant | BRAF   | 478         | benign (0.195)            | deleterious (0)    | ENSP00000288602.6;p.Lys601Glu  | EARLY |
| CAS-C | DM5 | 7;140453134;T;C | 0.78 | missense variant | BRAF   | 478         | benign (0.195)            | deleterious (0)    | ENSP00000288602.6;p.Lys601Glu  | EARLY |
| CAS-C | DM6 | 7;140453134;T;C | 0.85 | missense variant | BRAF   | 478         | benign (0.195)            | deleterious (0)    | ENSP00000288602.6;p.Lys601Glu  | EARLY |
| CAS-C | P   | 7;140453134;T;C | 0.83 | missense variant | BRAF   | 478         | benign (0.195)            | deleterious (0)    | ENSP00000288602.6;p.Lys601Glu  | EARLY |
| CAS-C | DM1 | 7;2977660;C;T   | 0.49 | missense variant | CARD11 | .           | possibly damaging (0.883) | deleterious (0.04) | ENSP00000380150.4;p.Glu342Lys  | EARLY |
| CAS-C | DM2 | 7;2977660;C;T   | 0.50 | missense variant | CARD11 | .           | possibly damaging (0.883) | deleterious (0.04) | ENSP00000380150.4;p.Glu342Lys  | EARLY |
| CAS-C | DM3 | 7;2977660;C;T   | 0.34 | missense variant | CARD11 | .           | possibly damaging (0.883) | deleterious (0.04) | ENSP00000380150.4;p.Glu342Lys  | EARLY |
| CAS-C | DM4 | 7;2977660;C;T   | 0.35 | missense variant | CARD11 | .           | possibly damaging (0.883) | deleterious (0.04) | ENSP00000380150.4;p.Glu342Lys  | EARLY |
| CAS-C | DM5 | 7;2977660;C;T   | 0.64 | missense variant | CARD11 | .           | possibly damaging (0.883) | deleterious (0.04) | ENSP00000380150.4;p.Glu342Lys  | EARLY |
| CAS-C | DM6 | 7;2977660;C;T   | 0.50 | missense variant | CARD11 | .           | possibly damaging (0.883) | deleterious (0.04) | ENSP00000380150.4;p.Glu342Lys  | EARLY |
| CAS-C | P   | 7;2977660;C;T   | 0.43 | missense variant | CARD11 | .           | possibly damaging (0.883) | deleterious (0.04) | ENSP00000380150.4;p.Glu342Lys  | EARLY |
| CAS-C | DM1 | 4;126328110;G;A | 0.47 | missense variant | FAT4   | .           | benign (0.346)            | tolerated (0.49)   | ENSP00000335169.5;p.Asp93Asn   | EARLY |
| CAS-C | DM2 | 4;126328110;G;A | 0.50 | missense variant | FAT4   | .           | benign (0.346)            | tolerated (0.49)   | ENSP00000335169.5;p.Asp93Asn   | EARLY |
| CAS-C | DM3 | 4;126328110;G;A | 0.42 | missense variant | FAT4   | .           | benign (0.346)            | tolerated (0.49)   | ENSP00000335169.5;p.Asp93Asn   | EARLY |
| CAS-C | DM4 | 4;126328110;G;A | 0.39 | missense variant | FAT4   | .           | benign (0.346)            | tolerated (0.49)   | ENSP00000335169.5;p.Asp93Asn   | EARLY |
| CAS-C | DM5 | 4;126328110;G;A | 0.40 | missense variant | FAT4   | .           | benign (0.346)            | tolerated (0.49)   | ENSP00000335169.5;p.Asp93Asn   | EARLY |
| CAS-C | DM6 | 4;126328110;G;A | 0.50 | missense variant | FAT4   | .           | benign (0.346)            | tolerated (0.49)   | ENSP00000335169.5;p.Asp93Asn   | EARLY |
| CAS-C | P   | 4;126328110;G;A | 0.15 | missense variant | FAT4   | .           | benign (0.346)            | tolerated (0.49)   | ENSP00000335169.5;p.Asp93Asn   | EARLY |
| CAS-C | DM1 | 4;55948732;C;T  | 0.50 | missense variant | KDR    | .           | possibly damaging (0.784) | tolerated (0.44)   | ENSP00000263923.4;p.Glu1245Lys | EARLY |

|       |     |                 |      |                  |        |        |                           |                    |                                |       |
|-------|-----|-----------------|------|------------------|--------|--------|---------------------------|--------------------|--------------------------------|-------|
| CAS-C | DM2 | 4;55948732;C;T  | 0.50 | missense variant | KDR    | .      | possibly damaging (0.784) | tolerated (0.44)   | ENSP00000263923.4:p.Glu1245Lys | EARLY |
| CAS-C | DM3 | 4;55948732;C;T  | 0.39 | missense variant | KDR    | .      | possibly damaging (0.784) | tolerated (0.44)   | ENSP00000263923.4:p.Glu1245Lys | EARLY |
| CAS-C | DM4 | 4;55948732;C;T  | 0.47 | missense variant | KDR    | .      | possibly damaging (0.784) | tolerated (0.44)   | ENSP00000263923.4:p.Glu1245Lys | EARLY |
| CAS-C | DM5 | 4;55948732;C;T  | 0.50 | missense variant | KDR    | .      | possibly damaging (0.784) | tolerated (0.44)   | ENSP00000263923.4:p.Glu1245Lys | EARLY |
| CAS-C | DM6 | 4;55948732;C;T  | 0.47 | missense variant | KDR    | .      | possibly damaging (0.784) | tolerated (0.44)   | ENSP00000263923.4:p.Glu1245Lys | EARLY |
| CAS-C | P   | 4;55948732;C;T  | 0.50 | missense variant | KDR    | .      | possibly damaging (0.784) | tolerated (0.44)   | ENSP00000263923.4:p.Glu1245Lys | EARLY |
| CAS-C | DM1 | 7;151848068;C;T | 0.22 | missense variant | KMT2C  | .      | benign (0.044)            | deleterious (0.05) | ENSP00000262189.6:p.Val4231Ile | EARLY |
| CAS-C | DM2 | 7;151848068;C;T | 0.13 | missense variant | KMT2C  | .      | benign (0.044)            | deleterious (0.05) | ENSP00000262189.6:p.Val4231Ile | EARLY |
| CAS-C | DM3 | 7;151848068;C;T | 0.17 | missense variant | KMT2C  | .      | benign (0.044)            | deleterious (0.05) | ENSP00000262189.6:p.Val4231Ile | EARLY |
| CAS-C | DM4 | 7;151848068;C;T | 0.16 | missense variant | KMT2C  | .      | benign (0.044)            | deleterious (0.05) | ENSP00000262189.6:p.Val4231Ile | EARLY |
| CAS-C | DM5 | 7;151848068;C;T | 0.18 | missense variant | KMT2C  | .      | benign (0.044)            | deleterious (0.05) | ENSP00000262189.6:p.Val4231Ile | EARLY |
| CAS-C | DM6 | 7;151848068;C;T | 0.16 | missense variant | KMT2C  | .      | benign (0.044)            | deleterious (0.05) | ENSP00000262189.6:p.Val4231Ile | EARLY |
| CAS-C | P   | 7;151848068;C;T | 0.24 | missense variant | KMT2C  | .      | benign (0.044)            | deleterious (0.05) | ENSP00000262189.6:p.Val4231Ile | EARLY |
| CAS-C | DM1 | 20;50090574;G;A | 0.43 | missense variant | NFATC2 | .      | benign (0.064)            | tolerated (0.11)   | ENSP00000396471.1:p.Pro531Ser  | EARLY |
| CAS-C | DM2 | 20;50090574;G;A | 0.50 | missense variant | NFATC2 | .      | benign (0.064)            | tolerated (0.11)   | ENSP00000396471.1:p.Pro531Ser  | EARLY |
| CAS-C | DM3 | 20;50090574;G;A | 0.50 | missense variant | NFATC2 | .      | benign (0.064)            | tolerated (0.11)   | ENSP00000396471.1:p.Pro531Ser  | EARLY |
| CAS-C | DM4 | 20;50090574;G;A | 0.29 | missense variant | NFATC2 | .      | benign (0.064)            | tolerated (0.11)   | ENSP00000396471.1:p.Pro531Ser  | EARLY |
| CAS-C | DM5 | 20;50090574;G;A | 0.48 | missense variant | NFATC2 | .      | benign (0.064)            | tolerated (0.11)   | ENSP00000396471.1:p.Pro531Ser  | EARLY |
| CAS-C | DM6 | 20;50090574;G;A | 0.46 | missense variant | NFATC2 | .      | benign (0.064)            | tolerated (0.11)   | ENSP00000396471.1:p.Pro531Ser  | EARLY |
| CAS-C | P   | 20;50090574;G;A | 0.39 | missense variant | NFATC2 | .      | benign (0.064)            | tolerated (0.11)   | ENSP00000396471.1:p.Pro531Ser  | EARLY |
| CAS-C | P   | 12;70933756;G;A | 0.20 | stop gained      | PTPRB  | .      | .                         | .                  | ENSP00000447302.1:p.Arg1573Ter | EARLY |
| CAS-C | P   | 3;128348950;G;A | 0.15 | missense variant | RPN1   | .      | probably damaging (1)     | deleterious (0)    | ENSP00000417529.1:p.Arg122Trp  | EARLY |
| CAS-C | DM3 | 1;186307212;G;A | 0.14 | missense variant | TPR    | .      | .                         | deleterious (0.01) | ENSP00000356448.3:p.Arg1439Cys | LATE  |
| CAS-C | DM3 | 17;5037195;G;A  | 0.06 | missense variant | USP6   | .      | benign (0)                | tolerated (1)      | ENSP00000328010.4:p.Arg133Lys  | EARLY |
| CAS-C | DM4 | 17;5037195;G;A  | 0.06 | missense variant | USP6   | .      | benign (0)                | tolerated (1)      | ENSP00000328010.4:p.Arg133Lys  | EARLY |
| CAS-C | DM5 | 17;5037195;G;A  | 0.13 | missense variant | USP6   | .      | benign (0)                | tolerated (1)      | ENSP00000328010.4:p.Arg133Lys  | EARLY |
| CAS-C | DM6 | 17;5037195;G;A  | 0.02 | missense variant | USP6   | .      | benign (0)                | tolerated (1)      | ENSP00000328010.4:p.Arg133Lys  | EARLY |
| CAS-C | P   | 17;5037195;G;A  | 0.04 | missense variant | USP6   | .      | benign (0)                | tolerated (1)      | ENSP00000328010.4:p.Arg133Lys  | EARLY |
| CAS-C | DM1 | 8;30998973;C;T  | 0.48 | missense variant | WRN    | 136658 | probably damaging (0.999) | deleterious (0)    | ENSP00000298139.5:p.Arg999Cys  | EARLY |
| CAS-C | DM2 | 8;30998973;C;T  | 0.50 | missense variant | WRN    | 136658 | probably damaging (0.999) | deleterious (0)    | ENSP00000298139.5:p.Arg999Cys  | EARLY |
| CAS-C | DM3 | 8;30998973;C;T  | 0.42 | missense variant | WRN    | 136658 | probably damaging (0.999) | deleterious (0)    | ENSP00000298139.5:p.Arg999Cys  | EARLY |
| CAS-C | DM4 | 8;30998973;C;T  | 0.46 | missense variant | WRN    | 136658 | probably damaging (0.999) | deleterious (0)    | ENSP00000298139.5:p.Arg999Cys  | EARLY |
| CAS-C | DM5 | 8;30998973;C;T  | 0.50 | missense variant | WRN    | 136658 | probably damaging (0.999) | deleterious (0)    | ENSP00000298139.5:p.Arg999Cys  | EARLY |
| CAS-C | DM6 | 8;30998973;C;T  | 0.47 | missense variant | WRN    | 136658 | probably damaging (0.999) | deleterious (0)    | ENSP00000298139.5:p.Arg999Cys  | EARLY |
| CAS-C | P   | 8;30998973;C;T  | 0.50 | missense variant | WRN    | 136658 | probably damaging (0.999) | deleterious (0)    | ENSP00000298139.5:p.Arg999Cys  | EARLY |
| ETH-E | DM1 | 7;140453136;A;T | 0.50 | missense variant | BRAF   | 476    | possibly damaging (0.792) | deleterious (0)    | ENSP00000288602.6:p.Val600Glu  | EARLY |
| ETH-E | DM2 | 7;140453136;A;T | 0.50 | missense variant | BRAF   | 476    | possibly damaging (0.792) | deleterious (0)    | ENSP00000288602.6:p.Val600Glu  | EARLY |
| ETH-E | DM3 | 7;140453136;A;T | 0.50 | missense variant | BRAF   | 476    | possibly damaging (0.792) | deleterious (0)    | ENSP00000288602.6:p.Val600Glu  | EARLY |

|       |     |                                                    |      |                      |         |     |                           |                    |                                |       |
|-------|-----|----------------------------------------------------|------|----------------------|---------|-----|---------------------------|--------------------|--------------------------------|-------|
| ETH-E | P   | 7;140453136;A;T                                    | 0.48 | missense variant     | BRAF    | 476 | possibly damaging (0.792) | deleterious (0)    | ENSP00000288602.6;p.Val600Glu  | EARLY |
| ETH-E | RM  | 7;140453136;A;T                                    | 0.47 | missense variant     | BRAF    | 476 | possibly damaging (0.792) | deleterious (0)    | ENSP00000288602.6;p.Val600Glu  | EARLY |
| ETH-E | DM1 | 16;9857727;G;A                                     | 0.25 | missense variant     | GRIN2 A | .   | benign (0.174)            | deleterious (0.01) | ENSP00000454998.1;p.Ser1225Leu | EARLY |
| ETH-E | DM2 | 16;9857727;G;A                                     | 0.50 | missense variant     | GRIN2 A | .   | benign (0.174)            | deleterious (0.01) | ENSP00000454998.1;p.Ser1225Leu | EARLY |
| ETH-E | DM3 | 16;9857727;G;A                                     | 0.39 | missense variant     | GRIN2 A | .   | benign (0.174)            | deleterious (0.01) | ENSP00000454998.1;p.Ser1225Leu | EARLY |
| ETH-E | P   | 16;9857727;G;A                                     | 0.47 | missense variant     | GRIN2 A | .   | benign (0.174)            | deleterious (0.01) | ENSP00000454998.1;p.Ser1225Leu | EARLY |
| ETH-E | DM1 | 11;118379868;C;T                                   | 0.24 | missense variant     | KMT2 A  | .   | benign (0.121)            | tolerated (0.06)   | ENSP00000436786.1;p.Pro3618Leu | LATE  |
| ETH-E | DM1 | 22;21343965;GGAGGAGTGAGGGCGTGGGGAGCCAGGGCGCAGGTA;G | 0.26 | splice donor variant | LZTR1   | .   | .                         | .                  | .                              | EARLY |
| ETH-E | DM1 | 22;21348438;G;A                                    | 0.96 | missense variant     | LZTR1   | .   | benign (0.308)            | tolerated (0.13)   | ENSP00000374006.3;p.Val480Met  | EARLY |
| ETH-E | DM2 | 22;21348438;G;A                                    | 1.00 | missense variant     | LZTR1   | .   | benign (0.308)            | tolerated (0.13)   | ENSP00000374006.3;p.Val480Met  | EARLY |
| ETH-E | DM3 | 22;21348438;G;A                                    | 1.00 | missense variant     | LZTR1   | .   | benign (0.308)            | tolerated (0.13)   | ENSP00000374006.3;p.Val480Met  | EARLY |
| ETH-E | P   | 22;21348438;G;A                                    | 0.16 | missense variant     | LZTR1   | .   | benign (0.308)            | tolerated (0.13)   | ENSP00000374006.3;p.Val480Met  | EARLY |
| ETH-E | P   | 22;21343965;GGAGGAGTGAGGGCGTGGGGAGCCAGGGCGCAGGTA;G | 0.18 | splice donor variant | LZTR1   | .   | .                         | .                  | .                              | EARLY |
| ETH-E | RM  | 22;21348438;G;A                                    | 0.39 | missense variant     | LZTR1   | .   | benign (0.308)            | tolerated (0.13)   | ENSP00000374006.3;p.Val480Met  | EARLY |
| ETH-E | DM1 | 15;88476397;G;T                                    | 0.50 | missense variant     | NTRK3   | .   | probably damaging (0.968) | tolerated (0.27)   | ENSP00000354207.2;p.Leu579Met  | EARLY |
| ETH-E | DM2 | 15;88476397;G;T                                    | 0.50 | missense variant     | NTRK3   | .   | probably damaging (0.968) | tolerated (0.27)   | ENSP00000354207.2;p.Leu579Met  | EARLY |
| ETH-E | DM3 | 15;88476397;G;T                                    | 0.50 | missense variant     | NTRK3   | .   | probably damaging (0.968) | tolerated (0.27)   | ENSP00000354207.2;p.Leu579Met  | EARLY |
| ETH-E | P   | 15;88476397;G;T                                    | 0.02 | missense variant     | NTRK3   | .   | probably damaging (0.968) | tolerated (0.27)   | ENSP00000354207.2;p.Leu579Met  | EARLY |
| ETH-E | RM  | 15;88476397;G;T                                    | 0.44 | missense variant     | NTRK3   | .   | probably damaging (0.968) | tolerated (0.27)   | ENSP00000354207.2;p.Leu579Met  | EARLY |
| ETH-E | DM1 | 6;84270606;G;T                                     | 0.66 | missense variant     | SNAP9 I | .   | possibly damaging (0.824) | tolerated (0.33)   | ENSP00000428215.1;p.Gln835Lys  | LATE  |
| ETH-E | DM2 | 6;84270606;G;T                                     | 0.36 | missense variant     | SNAP9 I | .   | possibly damaging (0.824) | tolerated (0.33)   | ENSP00000428215.1;p.Gln835Lys  | LATE  |
| ETH-E | DM3 | 6;84270606;G;T                                     | 0.37 | missense variant     | SNAP9 I | .   | possibly damaging (0.824) | tolerated (0.33)   | ENSP00000428215.1;p.Gln835Lys  | LATE  |
| ETH-F | P3  | 17;16089896;G;A                                    | 0.27 | missense variant     | NCOR1   | .   | probably damaging (0.997) | deleterious (0)    | ENSP00000268712.2;p.Leu72Phe   | EARLY |
| ETH-J | DM1 | 4;126239655;C;G                                    | 0.49 | missense variant     | FAT4    | .   | benign (0.309)            | tolerated (0.35)   | ENSP00000377862.3;p.His697Asp  | EARLY |
| ETH-J | DM2 | 4;126239655;C;G                                    | 0.35 | missense variant     | FAT4    | .   | benign (0.309)            | tolerated (0.35)   | ENSP00000377862.3;p.His697Asp  | EARLY |
| ETH-J | DM3 | 4;126239655;C;G                                    | 0.29 | missense variant     | FAT4    | .   | benign (0.309)            | tolerated (0.35)   | ENSP00000377862.3;p.His697Asp  | EARLY |
| ETH-J | P2  | 4;126239655;C;G                                    | 0.01 | missense variant     | FAT4    | .   | benign (0.309)            | tolerated (0.35)   | ENSP00000377862.3;p.His697Asp  | EARLY |
| ETH-J | RM  | 4;126239655;C;G                                    | 0.33 | missense variant     | FAT4    | .   | benign (0.309)            | tolerated (0.35)   | ENSP00000377862.3;p.His697Asp  | EARLY |
| ETH-J | DM1 | 1;115256529;T;C                                    | 0.92 | missense variant     | NRAS    | 584 | benign (0.006)            | deleterious (0.03) | ENSP00000358548.4;p.Gln61Arg   | EARLY |
| ETH-J | DM2 | 1;115256529;T;C                                    | 0.98 | missense variant     | NRAS    | 584 | benign (0.006)            | deleterious (0.03) | ENSP00000358548.4;p.Gln61Arg   | EARLY |
| ETH-J | DM3 | 1;115256529;T;C                                    | 0.96 | missense variant     | NRAS    | 584 | benign (0.006)            | deleterious (0.03) | ENSP00000358548.4;p.Gln61Arg   | EARLY |
| ETH-J | P1  | 1;115256529;T;C                                    | 0.91 | missense variant     | NRAS    | 584 | benign (0.006)            | deleterious (0.03) | ENSP00000358548.4;p.Gln61Arg   | EARLY |
| ETH-J | P2  | 1;115256529;T;C                                    | 1.00 | missense variant     | NRAS    | 584 | benign (0.006)            | deleterious (0.03) | ENSP00000358548.4;p.Gln61Arg   | EARLY |
| ETH-J | RM  | 1;115256529;T;C                                    | 0.98 | missense variant     | NRAS    | 584 | benign (0.006)            | deleterious (0.03) | ENSP00000358548.4;p.Gln61Arg   | EARLY |
| MI-F  | DM  | 5;112154970;G;T                                    | 0.39 | missense variant     | APC     | .   | possibly damaging (0.762) | deleterious (0.02) | ENSP00000423828.2;p.Arg414Leu  | EARLY |
| MI-F  | DM  | 5;112170771;C;T                                    | 0.33 | missense variant     | APC     | .   | possibly damaging (0.874) | deleterious (0.01) | ENSP00000473355.1;p.Arg186Trp  | EARLY |
| MI-F  | P   | 5;112154970;G;T                                    | 0.33 | missense variant     | APC     | .   | possibly damaging (0.762) | deleterious (0.02) | ENSP00000423828.2;p.Arg414Leu  | EARLY |

|      |     |                  |      |                  |           |         |                           |                    |                                |       |
|------|-----|------------------|------|------------------|-----------|---------|---------------------------|--------------------|--------------------------------|-------|
| MI-F | P   | 5;112170771;C;T  | 0.50 | missense variant | APC       | .       | possibly damaging (0.874) | deleterious (0.01) | ENSP00000473355.1;p.Arg186Trp  | EARLY |
| MI-F | RM1 | 5;112170771;C;T  | 0.43 | missense variant | APC       | .       | possibly damaging (0.874) | deleterious (0.01) | ENSP00000473355.1;p.Arg186Trp  | EARLY |
| MI-F | RM1 | 5;112154970;G;T  | 0.48 | missense variant | APC       | .       | possibly damaging (0.762) | deleterious (0.02) | ENSP00000423828.2;p.Arg414Leu  | EARLY |
| MI-F | RM2 | 5;112170771;C;T  | 0.47 | missense variant | APC       | .       | possibly damaging (0.874) | deleterious (0.01) | ENSP00000473355.1;p.Arg186Trp  | EARLY |
| MI-F | RM2 | 5;112154970;G;T  | 0.35 | missense variant | APC       | .       | possibly damaging (0.762) | deleterious (0.02) | ENSP00000423828.2;p.Arg414Leu  | EARLY |
| MI-F | DM  | 11;120347394;C;T | 0.65 | missense variant | ARHG EF12 | .       | probably damaging (0.995) | tolerated (0.19)   | ENSP00000349056.3;p.Ser1082Phe | EARLY |
| MI-F | P   | 11;120347394;C;T | 0.65 | missense variant | ARHG EF12 | .       | probably damaging (0.995) | tolerated (0.19)   | ENSP00000349056.3;p.Ser1082Phe | EARLY |
| MI-F | RM1 | 11;120347394;C;T | 0.50 | missense variant | ARHG EF12 | .       | probably damaging (0.995) | tolerated (0.19)   | ENSP00000349056.3;p.Ser1082Phe | EARLY |
| MI-F | RM2 | 11;120347394;C;T | 0.54 | missense variant | ARHG EF12 | .       | probably damaging (0.995) | tolerated (0.19)   | ENSP00000349056.3;p.Ser1082Phe | EARLY |
| MI-F | DM  | 6;157495190;C;T  | 0.31 | missense variant | ARID1 B   | .       | benign (0.407)            | tolerated (0.05)   | ENSP00000275248.4;p.Pro954Leu  | EARLY |
| MI-F | P   | 6;157495190;C;T  | 0.44 | missense variant | ARID1 B   | .       | benign (0.407)            | tolerated (0.05)   | ENSP00000275248.4;p.Pro954Leu  | EARLY |
| MI-F | RM1 | 6;157495190;C;T  | 0.46 | missense variant | ARID1 B   | .       | benign (0.407)            | tolerated (0.05)   | ENSP00000275248.4;p.Pro954Leu  | EARLY |
| MI-F | RM2 | 6;157495190;C;T  | 0.37 | missense variant | ARID1 B   | .       | benign (0.407)            | tolerated (0.05)   | ENSP00000275248.4;p.Pro954Leu  | EARLY |
| MI-F | DM  | 12;46230632;G;T  | 0.67 | missense variant | ARID2     | 1183572 | probably damaging (0.996) | deleterious (0)    | ENSP00000415650.1;p.Arg145Ile  | EARLY |
| MI-F | DM  | 12;46230641;C;T  | 0.33 | missense variant | ARID2     | 1167991 | probably damaging (0.997) | deleterious (0)    | ENSP00000335044.6;p.Ser297Phe  | EARLY |
| MI-F | P   | 12;46230632;G;T  | 0.64 | missense variant | ARID2     | 1183572 | probably damaging (0.996) | deleterious (0)    | ENSP00000415650.1;p.Arg145Ile  | EARLY |
| MI-F | P   | 12;46230641;C;T  | 0.30 | missense variant | ARID2     | 1167991 | probably damaging (0.997) | deleterious (0)    | ENSP00000335044.6;p.Ser297Phe  | EARLY |
| MI-F | RM1 | 12;46230641;C;T  | 0.33 | missense variant | ARID2     | 1167991 | probably damaging (0.997) | deleterious (0)    | ENSP00000335044.6;p.Ser297Phe  | EARLY |
| MI-F | RM1 | 12;46230632;G;T  | 0.65 | missense variant | ARID2     | 1183572 | probably damaging (0.996) | deleterious (0)    | ENSP00000415650.1;p.Arg145Ile  | EARLY |
| MI-F | RM2 | 12;46230632;G;T  | 0.66 | missense variant | ARID2     | 1183572 | probably damaging (0.996) | deleterious (0)    | ENSP00000415650.1;p.Arg145Ile  | EARLY |
| MI-F | RM2 | 12;46230641;C;T  | 0.30 | missense variant | ARID2     | 1167991 | probably damaging (0.997) | deleterious (0)    | ENSP00000335044.6;p.Ser297Phe  | EARLY |
| MI-F | DM  | 22;19210287;G;A  | 0.44 | missense variant | CLTCL 1   | 182039  | probably damaging (0.965) | deleterious (0)    | ENSP00000439662.1;p.Arg780Cys  | EARLY |
| MI-F | P   | 22;19210287;G;A  | 0.50 | missense variant | CLTCL 1   | 182039  | probably damaging (0.965) | deleterious (0)    | ENSP00000439662.1;p.Arg780Cys  | EARLY |
| MI-F | RM1 | 22;19210287;G;A  | 0.43 | missense variant | CLTCL 1   | 182039  | probably damaging (0.965) | deleterious (0)    | ENSP00000439662.1;p.Arg780Cys  | EARLY |
| MI-F | RM2 | 22;19210287;G;A  | 0.50 | missense variant | CLTCL 1   | 182039  | probably damaging (0.965) | deleterious (0)    | ENSP00000439662.1;p.Arg780Cys  | EARLY |
| MI-F | DM  | 12;48391466;C;T  | 0.43 | missense variant | COL2A 1   | .       | unknown (0)               | tolerated (0.1)    | ENSP00000338213.6;p.Asp83Asn   | EARLY |
| MI-F | DM  | 12;48378831;C;T  | 0.65 | missense variant | COL2A 1   | .       | probably damaging (1)     | deleterious (0)    | ENSP00000338213.6;p.Gly525Arg  | EARLY |
| MI-F | P   | 12;48391466;C;T  | 0.26 | missense variant | COL2A 1   | .       | unknown (0)               | tolerated (0.1)    | ENSP00000338213.6;p.Asp83Asn   | EARLY |
| MI-F | P   | 12;48378831;C;T  | 0.67 | missense variant | COL2A 1   | .       | probably damaging (1)     | deleterious (0)    | ENSP00000338213.6;p.Gly525Arg  | EARLY |
| MI-F | RM1 | 12;48378831;C;T  | 0.67 | missense variant | COL2A 1   | .       | probably damaging (1)     | deleterious (0)    | ENSP00000338213.6;p.Gly525Arg  | EARLY |
| MI-F | RM1 | 12;48391466;C;T  | 0.34 | missense variant | COL2A 1   | .       | unknown (0)               | tolerated (0.1)    | ENSP00000338213.6;p.Asp83Asn   | EARLY |
| MI-F | RM2 | 12;48378831;C;T  | 0.67 | missense variant | COL2A 1   | .       | probably damaging (1)     | deleterious (0)    | ENSP00000338213.6;p.Gly525Arg  | EARLY |
| MI-F | RM2 | 12;48391466;C;T  | 0.32 | missense variant | COL2A 1   | .       | unknown (0)               | tolerated (0.1)    | ENSP00000338213.6;p.Asp83Asn   | EARLY |
| MI-F | DM  | 1;36932277;C;T   | 0.36 | missense variant | CSF3R     | .       | benign (0.083)            | tolerated (0.2)    | ENSP00000355406.4;p.Gly731Glu  | EARLY |
| MI-F | P   | 1;36932277;C;T   | 0.50 | missense variant | CSF3R     | .       | benign (0.083)            | tolerated (0.2)    | ENSP00000355406.4;p.Gly731Glu  | EARLY |
| MI-F | RM1 | 1;36932277;C;T   | 0.44 | missense variant | CSF3R     | .       | benign (0.083)            | tolerated (0.2)    | ENSP00000355406.4;p.Gly731Glu  | EARLY |
| MI-F | RM2 | 1;36932277;C;T   | 0.50 | missense variant | CSF3R     | .       | benign (0.083)            | tolerated (0.2)    | ENSP00000355406.4;p.Gly731Glu  | EARLY |

|      |     |                  |      |                  |            |   |                           |                    |                                    |       |
|------|-----|------------------|------|------------------|------------|---|---------------------------|--------------------|------------------------------------|-------|
| MI-F | DM  | 4;126372579;C;T  | 0.88 | stop gained      | FAT4       | . | .                         | .                  | ENSP00000335169.<br>5:p.Arg1768Ter | EARLY |
| MI-F | P   | 4;126372579;C;T  | 1.00 | stop gained      | FAT4       | . | .                         | .                  | ENSP00000335169.<br>5:p.Arg1768Ter | EARLY |
| MI-F | RM1 | 4;126372579;C;T  | 0.79 | stop gained      | FAT4       | . | .                         | .                  | ENSP00000335169.<br>5:p.Arg1768Ter | EARLY |
| MI-F | RM2 | 4;126372579;C;T  | 0.95 | stop gained      | FAT4       | . | .                         | .                  | ENSP00000335169.<br>5:p.Arg1768Ter | EARLY |
| MI-F | DM  | 16;9857500;C;T   | 0.37 | missense variant | GRIN2<br>A | . | benign (0.345)            | deleterious (0.01) | ENSP00000379820.<br>2:p.Glu1301Lys | EARLY |
| MI-F | DM  | 16;9923507;G;A   | 0.50 | missense variant | GRIN2<br>A | . | probably damaging (0.997) | tolerated (0.12)   | ENSP00000454998.<br>1:p.Pro594Ser  | EARLY |
| MI-F | DM  | 16;10273929;C;T  | 0.50 | missense variant | GRIN2<br>A | . | probably damaging (0.996) | deleterious (0.03) | ENSP00000454998.<br>1:p.Asp114Asn  | EARLY |
| MI-F | DM  | 16;9857502;C;T   | 0.47 | missense variant | GRIN2<br>A | . | benign (0.078)            | tolerated (1)      | ENSP00000379820.<br>2:p.Arg1300Lys | EARLY |
| MI-F | P   | 16;9857502;C;T   | 0.50 | missense variant | GRIN2<br>A | . | benign (0.078)            | tolerated (1)      | ENSP00000379820.<br>2:p.Arg1300Lys | EARLY |
| MI-F | P   | 16;10273929;C;T  | 0.45 | missense variant | GRIN2<br>A | . | probably damaging (0.996) | deleterious (0.03) | ENSP00000454998.<br>1:p.Asp114Asn  | EARLY |
| MI-F | P   | 16;9857500;C;T   | 0.38 | missense variant | GRIN2<br>A | . | benign (0.345)            | deleterious (0.01) | ENSP00000379820.<br>2:p.Glu1301Lys | EARLY |
| MI-F | P   | 16;9923507;G;A   | 0.47 | missense variant | GRIN2<br>A | . | probably damaging (0.997) | tolerated (0.12)   | ENSP00000454998.<br>1:p.Pro594Ser  | EARLY |
| MI-F | RM1 | 16;9857502;C;T   | 0.45 | missense variant | GRIN2<br>A | . | benign (0.078)            | tolerated (1)      | ENSP00000379820.<br>2:p.Arg1300Lys | EARLY |
| MI-F | RM1 | 16;9923507;G;A   | 0.41 | missense variant | GRIN2<br>A | . | probably damaging (0.997) | tolerated (0.12)   | ENSP00000454998.<br>1:p.Pro594Ser  | EARLY |
| MI-F | RM1 | 16;10273929;C;T  | 0.40 | missense variant | GRIN2<br>A | . | probably damaging (0.996) | deleterious (0.03) | ENSP00000454998.<br>1:p.Asp114Asn  | EARLY |
| MI-F | RM1 | 16;9857500;C;T   | 0.37 | missense variant | GRIN2<br>A | . | benign (0.345)            | deleterious (0.01) | ENSP00000379820.<br>2:p.Glu1301Lys | EARLY |
| MI-F | RM2 | 16;9857502;C;T   | 0.37 | missense variant | GRIN2<br>A | . | benign (0.078)            | tolerated (1)      | ENSP00000379820.<br>2:p.Arg1300Lys | EARLY |
| MI-F | RM2 | 16;9923507;G;A   | 0.48 | missense variant | GRIN2<br>A | . | probably damaging (0.997) | tolerated (0.12)   | ENSP00000454998.<br>1:p.Pro594Ser  | EARLY |
| MI-F | RM2 | 16;9857500;C;T   | 0.50 | missense variant | GRIN2<br>A | . | benign (0.345)            | deleterious (0.01) | ENSP00000379820.<br>2:p.Glu1301Lys | EARLY |
| MI-F | RM2 | 16;10273929;C;T  | 0.50 | missense variant | GRIN2<br>A | . | probably damaging (0.996) | deleterious (0.03) | ENSP00000454998.<br>1:p.Asp114Asn  | EARLY |
| MI-F | DM  | 7;50367333;C;T   | 0.27 | missense variant | IKZF1      | . | benign (0.005)            | deleterious (0.04) | ENSP00000413025.<br>1:p.Ser47Phe   | EARLY |
| MI-F | DM  | 7;50444407;C;T   | 0.39 | missense variant | IKZF1      | . | possibly damaging (0.905) | tolerated (0.06)   | ENSP00000413025.<br>1:p.Pro113Ser  | EARLY |
| MI-F | DM  | 7;50459516;A;G   | 0.53 | missense variant | IKZF1      | . | benign (0.004)            | tolerated (0.11)   | ENSP00000413025.<br>1:p.Ser227Gly  | EARLY |
| MI-F | P   | 7;50459516;A;G   | 0.57 | missense variant | IKZF1      | . | benign (0.004)            | tolerated (0.11)   | ENSP00000413025.<br>1:p.Ser227Gly  | EARLY |
| MI-F | P   | 7;50367333;C;T   | 0.39 | missense variant | IKZF1      | . | benign (0.005)            | deleterious (0.04) | ENSP00000413025.<br>1:p.Ser47Phe   | EARLY |
| MI-F | P   | 7;50444407;C;T   | 0.43 | missense variant | IKZF1      | . | possibly damaging (0.905) | tolerated (0.06)   | ENSP00000413025.<br>1:p.Pro113Ser  | EARLY |
| MI-F | RM1 | 7;50367333;C;T   | 0.27 | missense variant | IKZF1      | . | benign (0.005)            | deleterious (0.04) | ENSP00000413025.<br>1:p.Ser47Phe   | EARLY |
| MI-F | RM1 | 7;50444407;C;T   | 0.48 | missense variant | IKZF1      | . | possibly damaging (0.905) | tolerated (0.06)   | ENSP00000413025.<br>1:p.Pro113Ser  | EARLY |
| MI-F | RM1 | 7;50459516;A;G   | 0.59 | missense variant | IKZF1      | . | benign (0.004)            | tolerated (0.11)   | ENSP00000413025.<br>1:p.Ser227Gly  | EARLY |
| MI-F | RM2 | 7;50444407;C;T   | 0.50 | missense variant | IKZF1      | . | possibly damaging (0.905) | tolerated (0.06)   | ENSP00000413025.<br>1:p.Pro113Ser  | EARLY |
| MI-F | RM2 | 7;50459516;A;G   | 0.59 | missense variant | IKZF1      | . | benign (0.004)            | tolerated (0.11)   | ENSP00000413025.<br>1:p.Ser227Gly  | EARLY |
| MI-F | RM2 | 7;50367333;C;T   | 0.35 | missense variant | IKZF1      | . | benign (0.005)            | deleterious (0.04) | ENSP00000413025.<br>1:p.Ser47Phe   | EARLY |
| MI-F | DM  | 4;55955063;C;T   | 0.98 | missense variant | KDR        | . | probably damaging (0.997) | deleterious (0)    | ENSP00000263923.<br>4:p.Gly1161Glu | EARLY |
| MI-F | P   | 4;55955063;C;T   | 1.00 | missense variant | KDR        | . | probably damaging (0.997) | deleterious (0)    | ENSP00000263923.<br>4:p.Gly1161Glu | EARLY |
| MI-F | RM1 | 4;55955063;C;T   | 0.73 | missense variant | KDR        | . | probably damaging (0.997) | deleterious (0)    | ENSP00000263923.<br>4:p.Gly1161Glu | EARLY |
| MI-F | RM2 | 4;55955063;C;T   | 0.98 | missense variant | KDR        | . | probably damaging (0.997) | deleterious (0)    | ENSP00000263923.<br>4:p.Gly1161Glu | EARLY |
| MI-F | DM  | 11;118360549;G;A | 0.28 | missense variant | KMT2<br>A  | . | probably damaging (0.996) | tolerated (0.13)   | ENSP00000376612.<br>3:p.Glu220Lys  | EARLY |
| MI-F | DM  | 11;118390431;C;T | 0.32 | missense variant | KMT2<br>A  | . | probably damaging (0.999) | deleterious (0)    | ENSP00000374157.<br>5:p.Arg3746Cys | EARLY |

|      |     |                  |      |                  |       |                           |                    |                                |       |
|------|-----|------------------|------|------------------|-------|---------------------------|--------------------|--------------------------------|-------|
| MI-F | P   | 11;118390431;C;T | 0.34 | missense variant | KMT2A | probably damaging (0.999) | deleterious (0)    | ENSP00000374157.5;p.Arg3746Cys | EARLY |
| MI-F | P   | 11;118360549;G;A | 0.31 | missense variant | KMT2A | probably damaging (0.996) | tolerated (0.13)   | ENSP00000376612.3;p.Glu220Lys  | EARLY |
| MI-F | RM1 | 11;118390431;C;T | 0.39 | missense variant | KMT2A | probably damaging (0.999) | deleterious (0)    | ENSP00000374157.5;p.Arg3746Cys | EARLY |
| MI-F | RM1 | 11;118360549;G;A | 0.27 | missense variant | KMT2A | probably damaging (0.996) | tolerated (0.13)   | ENSP00000376612.3;p.Glu220Lys  | EARLY |
| MI-F | RM2 | 11;118360549;G;A | 0.29 | missense variant | KMT2A | probably damaging (0.996) | tolerated (0.13)   | ENSP00000376612.3;p.Glu220Lys  | EARLY |
| MI-F | RM2 | 11;118390431;C;T | 0.36 | missense variant | KMT2A | probably damaging (0.999) | deleterious (0)    | ENSP00000374157.5;p.Arg3746Cys | EARLY |
| MI-F | DM  | 12;49432428;G;A  | 0.31 | missense variant | KMT2D | possibly damaging (0.468) | .                  | ENSP00000301067.7;p.Pro2904Leu | EARLY |
| MI-F | P   | 12;49432428;G;A  | 0.33 | missense variant | KMT2D | possibly damaging (0.468) | .                  | ENSP00000301067.7;p.Pro2904Leu | EARLY |
| MI-F | RM1 | 12;49432428;G;A  | 0.29 | missense variant | KMT2D | possibly damaging (0.468) | .                  | ENSP00000301067.7;p.Pro2904Leu | EARLY |
| MI-F | RM2 | 12;49432428;G;A  | 0.39 | missense variant | KMT2D | possibly damaging (0.468) | .                  | ENSP00000301067.7;p.Pro2904Leu | EARLY |
| MI-F | DM  | 22;21344778;C;T  | 0.43 | missense variant | LZTR1 | probably damaging (0.982) | deleterious (0.02) | ENSP00000374006.3;p.Thr233Ile  | EARLY |
| MI-F | P   | 22;21344778;C;T  | 0.44 | missense variant | LZTR1 | probably damaging (0.982) | deleterious (0.02) | ENSP00000374006.3;p.Thr233Ile  | EARLY |
| MI-F | RM1 | 22;21344778;C;T  | 0.44 | missense variant | LZTR1 | probably damaging (0.982) | deleterious (0.02) | ENSP00000374006.3;p.Thr233Ile  | EARLY |
| MI-F | RM2 | 22;21344778;C;T  | 0.37 | missense variant | LZTR1 | probably damaging (0.982) | deleterious (0.02) | ENSP00000374006.3;p.Thr233Ile  | EARLY |
| MI-F | DM  | 12;124846825;C;A | 0.50 | stop gained      | NCOR2 | .                         | .                  | ENSP00000400281.2;p.Glu965Ter  | EARLY |
| MI-F | P   | 12;124846825;C;A | 0.39 | stop gained      | NCOR2 | .                         | .                  | ENSP00000400281.2;p.Glu965Ter  | EARLY |
| MI-F | RM1 | 12;124846825;C;A | 0.29 | stop gained      | NCOR2 | .                         | .                  | ENSP00000400281.2;p.Glu965Ter  | EARLY |
| MI-F | RM2 | 12;124846825;C;A | 0.47 | stop gained      | NCOR2 | .                         | .                  | ENSP00000400281.2;p.Glu965Ter  | EARLY |
| MI-F | DM  | 5;176721004;C;T  | 0.35 | missense variant | NSD1  | probably damaging (0.996) | deleterious (0)    | ENSP00000343209.4;p.Pro1943Leu | EARLY |
| MI-F | P   | 5;176721004;C;T  | 0.31 | missense variant | NSD1  | probably damaging (0.996) | deleterious (0)    | ENSP00000343209.4;p.Pro1943Leu | EARLY |
| MI-F | RM1 | 5;176721004;C;T  | 0.50 | missense variant | NSD1  | probably damaging (0.996) | deleterious (0)    | ENSP00000343209.4;p.Pro1943Leu | EARLY |
| MI-F | RM2 | 5;176721004;C;T  | 0.34 | missense variant | NSD1  | probably damaging (0.996) | deleterious (0)    | ENSP00000343209.4;p.Pro1943Leu | EARLY |
| MI-F | DM  | 15;88690570;C;T  | 0.15 | missense variant | NTRK3 | benign (0.297)            | tolerated (0.16)   | ENSP00000354207.2;p.Glu154Lys  | EARLY |
| MI-F | P   | 15;88690570;C;T  | 0.50 | missense variant | NTRK3 | benign (0.297)            | tolerated (0.16)   | ENSP00000354207.2;p.Glu154Lys  | EARLY |
| MI-F | RM1 | 15;88690570;C;T  | 0.44 | missense variant | NTRK3 | benign (0.297)            | tolerated (0.16)   | ENSP00000354207.2;p.Glu154Lys  | EARLY |
| MI-F | RM2 | 15;88690570;C;T  | 0.32 | missense variant | NTRK3 | benign (0.297)            | tolerated (0.16)   | ENSP00000354207.2;p.Glu154Lys  | EARLY |
| MI-F | DM  | 11;71732301;G;A  | 0.50 | missense variant | NUMA1 | benign (0.273)            | deleterious (0.02) | ENSP00000444175.1;p.His137Tyr  | EARLY |
| MI-F | P   | 11;71732301;G;A  | 0.42 | missense variant | NUMA1 | benign (0.273)            | deleterious (0.02) | ENSP00000444175.1;p.His137Tyr  | EARLY |
| MI-F | RM1 | 11;71732301;G;A  | 0.43 | missense variant | NUMA1 | benign (0.273)            | deleterious (0.02) | ENSP00000444175.1;p.His137Tyr  | EARLY |
| MI-F | RM2 | 11;71732301;G;A  | 0.50 | missense variant | NUMA1 | benign (0.273)            | deleterious (0.02) | ENSP00000444175.1;p.His137Tyr  | EARLY |
| MI-F | DM  | 6;106554931;G;T  | 0.34 | missense variant | PRDM1 | probably damaging (0.972) | tolerated (0.05)   | ENSP00000358085.3;p.Arg549Leu  | EARLY |
| MI-F | DM  | 6;106553656;C;T  | 0.50 | missense variant | PRDM1 | benign (0.004)            | tolerated (0.68)   | ENSP00000358085.3;p.Pro407Ser  | EARLY |
| MI-F | P   | 6;106553656;C;T  | 0.45 | missense variant | PRDM1 | benign (0.004)            | tolerated (0.68)   | ENSP00000358085.3;p.Pro407Ser  | EARLY |
| MI-F | P   | 6;106554931;G;T  | 0.44 | missense variant | PRDM1 | probably damaging (0.972) | tolerated (0.05)   | ENSP00000358085.3;p.Arg549Leu  | EARLY |
| MI-F | RM1 | 6;106554931;G;T  | 0.49 | missense variant | PRDM1 | probably damaging (0.972) | tolerated (0.05)   | ENSP00000358085.3;p.Arg549Leu  | EARLY |
| MI-F | RM1 | 6;106553656;C;T  | 0.49 | missense variant | PRDM1 | benign (0.004)            | tolerated (0.68)   | ENSP00000358085.3;p.Pro407Ser  | EARLY |
| MI-F | RM2 | 6;106553656;C;T  | 0.49 | missense variant | PRDM1 | benign (0.004)            | tolerated (0.68)   | ENSP00000358085.3;p.Pro407Ser  | EARLY |

|      |     |                 |      |                  |       |                 |                           |                    |                                |       |
|------|-----|-----------------|------|------------------|-------|-----------------|---------------------------|--------------------|--------------------------------|-------|
| MI-F | RM2 | 6;106554931;G;T | 0.50 | missense variant | PRDM1 | .               | probably damaging (0.972) | tolerated (0.05)   | ENSP00000358085.3;p.Arg549Leu  | EARLY |
| MI-F | DM  | 12;70934719;A;T | 0.32 | missense variant | PTPRB | .               | probably damaging (0.937) | deleterious (0.01) | ENSP00000447302.1;p.Ile1530Asn | EARLY |
| MI-F | DM  | 12;71029678;G;A | 0.61 | missense variant | PTPRB | .               | benign (0.004)            | deleterious (0.02) | ENSP00000448349.1;p.Ser74Phe   | EARLY |
| MI-F | DM  | 12;70974905;G;A | 0.67 | missense variant | PTPRB | .               | benign (0.017)            | tolerated (0.19)   | ENSP00000447302.1;p.Ser522Phe  | EARLY |
| MI-F | P   | 12;71029678;G;A | 0.67 | missense variant | PTPRB | .               | benign (0.004)            | deleterious (0.02) | ENSP00000448349.1;p.Ser74Phe   | EARLY |
| MI-F | P   | 12;70974905;G;A | 0.67 | missense variant | PTPRB | .               | benign (0.017)            | tolerated (0.19)   | ENSP00000447302.1;p.Ser522Phe  | EARLY |
| MI-F | P   | 12;70934719;A;T | 0.30 | missense variant | PTPRB | .               | probably damaging (0.937) | deleterious (0.01) | ENSP00000447302.1;p.Ile1530Asn | EARLY |
| MI-F | RM1 | 12;71029678;G;A | 0.59 | missense variant | PTPRB | .               | benign (0.004)            | deleterious (0.02) | ENSP00000448349.1;p.Ser74Phe   | EARLY |
| MI-F | RM1 | 12;70974905;G;A | 0.61 | missense variant | PTPRB | .               | benign (0.017)            | tolerated (0.19)   | ENSP00000447302.1;p.Ser522Phe  | EARLY |
| MI-F | RM1 | 12;70934719;A;T | 0.23 | missense variant | PTPRB | .               | probably damaging (0.937) | deleterious (0.01) | ENSP00000447302.1;p.Ile1530Asn | EARLY |
| MI-F | RM2 | 12;70974905;G;A | 0.61 | missense variant | PTPRB | .               | benign (0.017)            | tolerated (0.19)   | ENSP00000447302.1;p.Ser522Phe  | EARLY |
| MI-F | RM2 | 12;70934719;A;T | 0.37 | missense variant | PTPRB | .               | probably damaging (0.937) | deleterious (0.01) | ENSP00000447302.1;p.Ile1530Asn | EARLY |
| MI-F | RM2 | 12;71029678;G;A | 0.67 | missense variant | PTPRB | .               | benign (0.004)            | deleterious (0.02) | ENSP00000448349.1;p.Ser74Phe   | EARLY |
| MI-F | DM  | 1;198721429;G;A | 0.50 | missense variant | PTPRC | .               | probably damaging (0.954) | deleterious (0.04) | ENSP00000411355.3;p.Glu1087Lys | EARLY |
| MI-F | P   | 1;198721429;G;A | 0.44 | missense variant | PTPRC | .               | probably damaging (0.954) | deleterious (0.04) | ENSP00000411355.3;p.Glu1087Lys | EARLY |
| MI-F | RM1 | 1;198721429;G;A | 0.50 | missense variant | PTPRC | .               | probably damaging (0.954) | deleterious (0.04) | ENSP00000411355.3;p.Glu1087Lys | EARLY |
| MI-F | RM2 | 1;198721429;G;A | 0.50 | missense variant | PTPRC | .               | probably damaging (0.954) | deleterious (0.04) | ENSP00000411355.3;p.Glu1087Lys | EARLY |
| MI-F | DM  | 6;117663609;T;A | 0.45 | missense variant | ROS1  | .               | benign (0.41)             | tolerated (0.07)   | ENSP00000357494.3;p.Glu1541Asp | EARLY |
| MI-F | DM  | 6;117687278;G;A | 0.50 | stop gained      | ROS1  | .               | .                         | .                  | ENSP00000357494.3;p.Gln925Ter  | EARLY |
| MI-F | DM  | 6;117708109;G;A | 0.50 | missense variant | ROS1  | .               | benign (0.295)            | tolerated (0.45)   | ENSP00000357494.3;p.Pro690Ser  | EARLY |
| MI-F | P   | 6;117663609;T;A | 0.46 | missense variant | ROS1  | .               | benign (0.41)             | tolerated (0.07)   | ENSP00000357494.3;p.Glu1541Asp | EARLY |
| MI-F | P   | 6;117687278;G;A | 0.43 | stop gained      | ROS1  | .               | .                         | .                  | ENSP00000357494.3;p.Gln925Ter  | EARLY |
| MI-F | P   | 6;117708109;G;A | 0.47 | missense variant | ROS1  | .               | benign (0.295)            | tolerated (0.45)   | ENSP00000357494.3;p.Pro690Ser  | EARLY |
| MI-F | RM1 | 6;117687278;G;A | 0.50 | stop gained      | ROS1  | .               | .                         | .                  | ENSP00000357494.3;p.Gln925Ter  | EARLY |
| MI-F | RM1 | 6;117663609;T;A | 0.48 | missense variant | ROS1  | .               | benign (0.41)             | tolerated (0.07)   | ENSP00000357494.3;p.Glu1541Asp | EARLY |
| MI-F | RM1 | 6;117708109;G;A | 0.50 | missense variant | ROS1  | .               | benign (0.295)            | tolerated (0.45)   | ENSP00000357494.3;p.Pro690Ser  | EARLY |
| MI-F | RM2 | 6;117687278;G;A | 0.50 | stop gained      | ROS1  | .               | .                         | .                  | ENSP00000357494.3;p.Gln925Ter  | EARLY |
| MI-F | RM2 | 6;117663609;T;A | 0.50 | missense variant | ROS1  | .               | benign (0.41)             | tolerated (0.07)   | ENSP00000357494.3;p.Glu1541Asp | EARLY |
| MI-F | RM2 | 6;117708109;G;A | 0.50 | missense variant | ROS1  | .               | benign (0.295)            | tolerated (0.45)   | ENSP00000357494.3;p.Pro690Ser  | EARLY |
| MI-F | DM  | 3;128348869;G;A | 0.41 | missense variant | RPN1  | .               | probably damaging (0.999) | deleterious (0)    | ENSP00000417529.1;p.Pro149Ser  | EARLY |
| MI-F | P   | 3;128348869;G;A | 0.50 | missense variant | RPN1  | .               | probably damaging (0.999) | deleterious (0)    | ENSP00000417529.1;p.Pro149Ser  | EARLY |
| MI-F | RM1 | 3;128348869;G;A | 0.50 | missense variant | RPN1  | .               | probably damaging (0.999) | deleterious (0)    | ENSP00000417529.1;p.Pro149Ser  | EARLY |
| MI-F | RM2 | 3;128348869;G;A | 0.45 | missense variant | RPN1  | .               | probably damaging (0.999) | deleterious (0)    | ENSP00000417529.1;p.Pro149Ser  | EARLY |
| MI-F | DM  | 3;47163802;A;C  | 0.28 | missense variant | SETD2 | 1423580,1423579 | benign (0.001)            | deleterious (0.01) | ENSP00000416401.1;p.Val731Gly  | EARLY |
| MI-F | P   | 3;47163802;A;C  | 0.48 | missense variant | SETD2 | 1423580,1423579 | benign (0.001)            | deleterious (0.01) | ENSP00000416401.1;p.Val731Gly  | EARLY |
| MI-F | RM1 | 3;47163802;A;C  | 0.50 | missense variant | SETD2 | 1423580,1423579 | benign (0.001)            | deleterious (0.01) | ENSP00000416401.1;p.Val731Gly  | EARLY |
| MI-F | RM2 | 3;47163802;A;C  | 0.42 | missense variant | SETD2 | 1423580,1423579 | benign (0.001)            | deleterious (0.01) | ENSP00000416401.1;p.Val731Gly  | EARLY |
| MI-F | DM  | 16;11348713;G;A | 0.50 | missense variant | SOCS1 | .               | probably damaging (1)     | deleterious (0)    | ENSP00000329418.2;p.Pro208Leu  | EARLY |
| MI-F | P   | 16;11348713;G;A | 0.50 | missense variant | SOCS1 | .               | probably damaging (1)     | deleterious (0)    | ENSP00000329418.2;p.Pro208Leu  | EARLY |



|      |     |                  |      |                         |           |                                   |                           |                    |                                |       |
|------|-----|------------------|------|-------------------------|-----------|-----------------------------------|---------------------------|--------------------|--------------------------------|-------|
| MI-F | RM1 | 16;11348713;G;A  | 0.50 | missense variant        | SOCS1     | .                                 | probably damaging (1)     | deleterious (0)    | ENSP00000329418.2;p.Pro208Leu  | EARLY |
| MI-F | RM2 | 16;11348713;G;A  | 0.50 | missense variant        | SOCS1     | .                                 | probably damaging (1)     | deleterious (0)    | ENSP00000329418.2;p.Pro208Leu  | EARLY |
| MI-F | DM  | 4;106197332;C;T  | 0.85 | missense variant        | TET2      | .                                 | probably damaging (1)     | deleterious (0)    | ENSP00000369351.4;p.Pro1889Ser | EARLY |
| MI-F | P   | 4;106197332;C;T  | 1.00 | missense variant        | TET2      | .                                 | probably damaging (1)     | deleterious (0)    | ENSP00000369351.4;p.Pro1889Ser | EARLY |
| MI-F | RM1 | 4;106197332;C;T  | 0.86 | missense variant        | TET2      | .                                 | probably damaging (1)     | deleterious (0)    | ENSP00000369351.4;p.Pro1889Ser | EARLY |
| MI-F | RM2 | 4;106197332;C;T  | 0.95 | missense variant        | TET2      | .                                 | probably damaging (1)     | deleterious (0)    | ENSP00000369351.4;p.Pro1889Ser | EARLY |
| MI-F | DM  | 17;7578517;G;A   | 0.50 | missense variant        | TP53      | 43818,288785,288784,288786,288787 | possibly damaging (0.661) | deleterious (0.03) | ENSP00000398846.2;p.Ala138Val  | EARLY |
| MI-F | P   | 17;7578517;G;A   | 0.47 | missense variant        | TP53      | 43818,288785,288784,288786,288787 | possibly damaging (0.661) | deleterious (0.03) | ENSP00000398846.2;p.Ala138Val  | EARLY |
| MI-F | RM1 | 17;7578517;G;A   | 0.37 | missense variant        | TP53      | 43818,288785,288784,288786,288787 | possibly damaging (0.661) | deleterious (0.03) | ENSP00000398846.2;p.Ala138Val  | EARLY |
| MI-F | RM2 | 17;7578517;G;A   | 0.39 | missense variant        | TP53      | 43818,288785,288784,288786,288787 | possibly damaging (0.661) | deleterious (0.03) | ENSP00000398846.2;p.Ala138Val  | EARLY |
| MI-F | DM  | 1;186304261;C;T  | 0.29 | missense variant        | TPR       | .                                 | .                         | tolerated (0.36)   | ENSP00000356448.3;p.Val1638Ile | EARLY |
| MI-F | DM  | 1;186304262;C;T  | 0.28 | splice acceptor variant | TPR       | .                                 | .                         | .                  | .                              | EARLY |
| MI-F | P   | 1;186304261;C;T  | 0.33 | missense variant        | TPR       | .                                 | .                         | tolerated (0.36)   | ENSP00000356448.3;p.Val1638Ile | EARLY |
| MI-F | P   | 1;186304262;C;T  | 0.35 | splice acceptor variant | TPR       | .                                 | .                         | .                  | .                              | EARLY |
| MI-F | RM1 | 1;186304261;C;T  | 0.41 | missense variant        | TPR       | .                                 | .                         | tolerated (0.36)   | ENSP00000356448.3;p.Val1638Ile | EARLY |
| MI-F | RM1 | 1;186304262;C;T  | 0.41 | splice acceptor variant | TPR       | .                                 | .                         | .                  | .                              | EARLY |
| MI-F | RM2 | 1;186304261;C;T  | 0.38 | missense variant        | TPR       | .                                 | .                         | tolerated (0.36)   | ENSP00000356448.3;p.Val1638Ile | EARLY |
| MI-F | RM2 | 1;186304262;C;T  | 0.39 | splice acceptor variant | TPR       | .                                 | .                         | .                  | .                              | EARLY |
| MI-F | DM  | 8;103326042;G;A  | 0.25 | missense variant        | UBR5      | .                                 | probably damaging (0.991) | deleterious (0)    | ENSP00000427819.1;p.Pro660Leu  | EARLY |
| MI-F | P   | 8;103326042;G;A  | 0.42 | missense variant        | UBR5      | .                                 | probably damaging (0.991) | deleterious (0)    | ENSP00000427819.1;p.Pro660Leu  | EARLY |
| MI-F | RM1 | 8;103326042;G;A  | 0.44 | missense variant        | UBR5      | .                                 | probably damaging (0.991) | deleterious (0)    | ENSP00000427819.1;p.Pro660Leu  | EARLY |
| MI-F | RM2 | 8;103326042;G;A  | 0.45 | missense variant        | UBR5      | .                                 | probably damaging (0.991) | deleterious (0)    | ENSP00000427819.1;p.Pro660Leu  | EARLY |
| MI-F | DM  | 8;30921942;C;T   | 0.67 | missense variant        | WRN       | .                                 | probably damaging (0.921) | deleterious (0)    | ENSP00000298139.5;p.Ser116Phe  | EARLY |
| MI-F | P   | 8;30921942;C;T   | 0.50 | missense variant        | WRN       | .                                 | probably damaging (0.921) | deleterious (0)    | ENSP00000298139.5;p.Ser116Phe  | EARLY |
| MI-F | RM1 | 8;30921942;C;T   | 0.50 | missense variant        | WRN       | .                                 | probably damaging (0.921) | deleterious (0)    | ENSP00000298139.5;p.Ser116Phe  | EARLY |
| MI-F | RM2 | 8;30921942;C;T   | 0.44 | missense variant        | WRN       | .                                 | probably damaging (0.921) | deleterious (0)    | ENSP00000298139.5;p.Ser116Phe  | EARLY |
| MI-F | DM  | 16;72822618;G;A  | 0.49 | missense variant        | ZFH3      | .                                 | unknown (0)               | .                  | ENSP00000268489.5;p.Ala3186Val | EARLY |
| MI-F | P   | 16;72822618;G;A  | 0.40 | missense variant        | ZFH3      | .                                 | unknown (0)               | .                  | ENSP00000268489.5;p.Ala3186Val | EARLY |
| MI-F | RM1 | 16;72822618;G;A  | 0.50 | missense variant        | ZFH3      | .                                 | unknown (0)               | .                  | ENSP00000268489.5;p.Ala3186Val | EARLY |
| MI-F | RM2 | 16;72822618;G;A  | 0.50 | missense variant        | ZFH3      | .                                 | unknown (0)               | .                  | ENSP00000268489.5;p.Ala3186Val | EARLY |
| SK-G | DM  | 11;120346199;T;C | 1.00 | missense variant        | ARHG EF12 | .                                 | probably damaging (0.993) | deleterious (0)    | ENSP00000349056.3;p.Val1068Ala | EARLY |
| SK-G | P   | 11;120346199;T;C | 0.99 | missense variant        | ARHG EF12 | .                                 | probably damaging (0.993) | deleterious (0)    | ENSP00000349056.3;p.Val1068Ala | EARLY |
| SK-G | RM  | 11;120346199;T;C | 1.00 | missense variant        | ARHG EF12 | .                                 | probably damaging (0.993) | deleterious (0)    | ENSP00000349056.3;p.Val1068Ala | EARLY |
| SK-G | DM  | 12;46254605;C;T  | 0.27 | missense variant        | ARID2     | .                                 | benign (0.002)            | tolerated (0.39)   | ENSP00000388357.1;p.Pro207Ser  | EARLY |
| SK-G | P   | 12;46254605;C;T  | 0.50 | missense variant        | ARID2     | .                                 | benign (0.002)            | tolerated (0.39)   | ENSP00000388357.1;p.Pro207Ser  | EARLY |
| SK-G | RM  | 12;46254605;C;T  | 0.42 | missense variant        | ARID2     | .                                 | benign (0.002)            | tolerated (0.39)   | ENSP00000388357.1;p.Pro207Ser  | EARLY |
| SK-G | P   | X;76854915;C;T   | 0.50 | missense variant        | ATRX      | .                                 | benign (0.027)            | tolerated (1)      | ENSP00000362441.4;p.Gly1974Glu | EARLY |
| SK-G | RM  | X;76854915;C;T   | 0.43 | missense variant        | ATRX      | .                                 | benign (0.027)            | tolerated (1)      | ENSP00000362441.4;p.Gly1974Glu | EARLY |
| SK-G | DM  | 4;187629712;C;A  | 0.50 | stop gained             | FAT1      | .                                 | .                         | .                  | ENSP00000406229.2;p.Glu424Ter  | EARLY |

|      |     |                  |      |                  |           |                 |                           |                    |                                    |       |
|------|-----|------------------|------|------------------|-----------|-----------------|---------------------------|--------------------|------------------------------------|-------|
| SK-G | P   | 4;187629712;C;A  | 0.49 | stop gained      | FAT1      | .               | .                         | .                  | ENSP00000406229.                   | EARLY |
| SK-G | RM  | 4;187629712;C;A  | 0.45 | stop gained      | FAT1      | .               | .                         | .                  | 2.p.Glu424Ter<br>ENSP00000406229.  | EARLY |
| SK-G | DM  | 5;180057098;G;A  | 0.38 | missense variant | FLT4      | 1293142,1293141 | benign (0.002)            | tolerated (0.32)   | ENSP00000377016.                   | EARLY |
| SK-G | P   | 5;180057098;G;A  | 0.27 | missense variant | FLT4      | 1293142,1293141 | benign (0.002)            | tolerated (0.32)   | 3.p.Ser174Leu<br>ENSP00000377016.  | EARLY |
| SK-G | RM  | 5;180057098;G;A  | 0.28 | missense variant | FLT4      | 1293142,1293141 | benign (0.002)            | tolerated (0.32)   | 3.p.Ser174Leu<br>ENSP00000377016.  | EARLY |
| SK-G | RM  | 7;151878296;G;A  | 0.42 | missense variant | KMT2C     | .               | benign (0.019)            | tolerated (0.11)   | ENSP00000262189.                   | LATE  |
| SK-G | DM  | 17;15968264;G;A  | 0.39 | missense variant | NCOR1     | .               | probably damaging (0.999) | deleterious (0.01) | ENSP00000268712.                   | EARLY |
| SK-G | DM  | 17;15968220;G;A  | 0.55 | missense variant | NCOR1     | .               | probably damaging (0.998) | tolerated (0.52)   | ENSP00000268712.                   | EARLY |
| SK-G | P   | 17;15968220;G;A  | 0.50 | missense variant | NCOR1     | .               | probably damaging (0.998) | tolerated (0.52)   | 2.p.Pro1689Ser<br>ENSP00000268712. | EARLY |
| SK-G | P   | 17;15968264;G;A  | 0.40 | missense variant | NCOR1     | .               | probably damaging (0.999) | deleterious (0.01) | ENSP00000268712.                   | EARLY |
| SK-G | RM  | 17;15968220;G;A  | 1.00 | missense variant | NCOR1     | .               | probably damaging (0.998) | tolerated (0.52)   | 2.p.Pro1689Ser<br>ENSP00000268712. | EARLY |
| SK-G | DM  | 1;115256530;G;T  | 0.50 | missense variant | NRAS      | 580             | benign (0.045)            | deleterious (0.01) | ENSP00000358548.                   | EARLY |
| SK-G | P   | 1;115256530;G;T  | 0.45 | missense variant | NRAS      | 580             | benign (0.045)            | deleterious (0.01) | 4.p.Gln61Lys<br>ENSP00000358548.   | EARLY |
| SK-G | RM  | 1;115256530;G;T  | 0.50 | missense variant | NRAS      | 580             | benign (0.045)            | deleterious (0.01) | 4.p.Gln61Lys<br>ENSP00000358548.   | EARLY |
| SK-G | DM  | 15;88522637;T;C  | 0.61 | missense variant | NTRK3     | .               | benign (0.001)            | deleterious (0)    | ENSP00000444673.                   | EARLY |
| SK-G | P   | 15;88522637;T;C  | 0.50 | missense variant | NTRK3     | .               | benign (0.001)            | deleterious (0)    | 2.p.Asn593Ser<br>ENSP00000444673.  | EARLY |
| SK-G | RM  | 15;88522637;T;C  | 0.45 | missense variant | NTRK3     | .               | benign (0.001)            | deleterious (0)    | 2.p.Asn593Ser<br>ENSP00000444673.  | EARLY |
| SK-G | RM  | 3;178921549;T;G  | 0.50 | missense variant | PIK3CA    | 22540,258749    | probably damaging (0.987) | deleterious (0)    | ENSP00000263967.                   | LATE  |
| SK-G | DM  | 3;128344836;G;A  | 0.37 | missense variant | RPN1      | .               | possibly damaging (0.831) | deleterious (0.03) | ENSP00000417529.                   | EARLY |
| SK-G | P   | 3;128344836;G;A  | 0.41 | missense variant | RPN1      | .               | possibly damaging (0.831) | deleterious (0.03) | 1.p.Pro214Ser<br>ENSP00000417529.  | EARLY |
| SK-G | RM  | 3;128344836;G;A  | 0.49 | missense variant | RPN1      | .               | possibly damaging (0.831) | deleterious (0.03) | 1.p.Pro214Ser<br>ENSP00000417529.  | EARLY |
| SK-G | RM  | 10;70404675;T;C  | 0.05 | missense variant | TET1      | .               | benign (0.156)            | tolerated (0.23)   | ENSP00000362748.                   | LATE  |
| SK-G | DM  | 16;2125841;G;A   | 0.60 | missense variant | TSC2      | .               | probably damaging (0.994) | deleterious (0.02) | ENSP00000371978.                   | EARLY |
| SK-G | P   | 16;2125841;G;A   | 0.47 | missense variant | TSC2      | .               | probably damaging (0.994) | deleterious (0.02) | 6.p.Glu814Lys<br>ENSP00000371978.  | EARLY |
| SK-G | RM  | 16;2125841;G;A   | 0.65 | missense variant | TSC2      | .               | probably damaging (0.994) | deleterious (0.02) | 6.p.Glu814Lys<br>ENSP00000371978.  | EARLY |
| SK-G | DM  | 17;5042622;G;A   | 0.67 | missense variant | USP6      | .               | probably damaging (0.969) | deleterious (0)    | ENSP00000328010.                   | EARLY |
| SK-G | P   | 17;5042622;G;A   | 0.50 | missense variant | USP6      | .               | probably damaging (0.969) | deleterious (0)    | 4.p.Gly384Glu<br>ENSP00000328010.  | EARLY |
| SK-G | DM  | 16;72992883;C;T  | 0.50 | missense variant | ZFH3      | 1609649         | benign (0.346)            | .                  | ENSP00000268489.                   | EARLY |
| SK-G | P   | 16;72992883;C;T  | 0.50 | missense variant | ZFH3      | 1609649         | benign (0.346)            | .                  | 5.p.Glu388Lys<br>ENSP00000268489.  | EARLY |
| SK-G | RM  | 16;72992883;C;T  | 0.50 | missense variant | ZFH3      | 1609649         | benign (0.346)            | .                  | 5.p.Glu388Lys<br>ENSP00000268489.  | EARLY |
| SK-H | RM2 | 5;112179165;G;A  | 0.48 | missense variant | APC       | .               | benign (0.001)            | tolerated (0.52)   | ENSP00000427089.                   | LATE  |
| SK-H | RM2 | 11;120310893;G;A | 0.50 | missense variant | ARHG EF12 | .               | probably damaging (1)     | deleterious (0)    | ENSP00000349056.                   | LATE  |
| SK-H | RM1 | 1;27099054;G;A   | 0.37 | missense variant | ARID1A    | .               | possibly damaging (0.511) | tolerated (0.09)   | ENSP00000390317.                   | LATE  |
| SK-H | RM1 | 6;157099854;G;A  | 0.10 | missense variant | ARID1B    | .               | unknown (0)               | deleterious (0.01) | ENSP00000275248.                   | LATE  |
| SK-H | DM  | 12;46230691;C;T  | 0.90 | missense variant | ARID2     | 278971          | probably damaging (0.997) | deleterious (0)    | ENSP00000415650.                   | EARLY |
| SK-H | P   | 12;46230691;C;T  | 0.50 | missense variant | ARID2     | 278971          | probably damaging (0.997) | deleterious (0)    | 1.p.Arg165Cys<br>ENSP00000415650.  | EARLY |
| SK-H | P   | 12;46230743;G;A  | 0.39 | missense variant | ARID2     | .               | probably damaging (0.999) | deleterious (0)    | ENSP00000415650.                   | EARLY |
| SK-H | RM1 | 12;46287425;G;A  | 0.29 | missense variant | ARID2     | .               | probably damaging (1)     | deleterious (0)    | 1.p.Gly182Asp<br>ENSP00000388357.  | LATE  |

|      |     |                  |      |                      |        |         |                           |                    |                                |       |
|------|-----|------------------|------|----------------------|--------|---------|---------------------------|--------------------|--------------------------------|-------|
| SK-H | RM1 | 12;46230743;G;A  | 0.67 | missense variant     | ARID2  | .       | probably damaging (0.999) | deleterious (0)    | ENSP00000415650.1:p.Gly182Asp  | EARLY |
| SK-H | RM1 | 12;46230691;C;T  | 0.42 | missense variant     | ARID2  | 278971  | probably damaging (0.997) | deleterious (0)    | ENSP00000415650.1:p.Arg165Cys  | EARLY |
| SK-H | RM2 | 12;46230691;C;T  | 0.30 | missense variant     | ARID2  | 278971  | probably damaging (0.997) | deleterious (0)    | ENSP00000415650.1:p.Arg165Cys  | EARLY |
| SK-H | RM2 | 12;46230743;G;A  | 0.65 | missense variant     | ARID2  | .       | probably damaging (0.999) | deleterious (0)    | ENSP00000415650.1:p.Gly182Asp  | EARLY |
| SK-H | RM1 | 20;31022265;G;A  | 0.11 | missense variant     | ASXL1  | .       | probably damaging (0.998) | deleterious (0)    | ENSP00000305119.5:p.Val579Met  | LATE  |
| SK-H | RM1 | 20;31024038;G;A  | 0.09 | missense variant     | ASXL1  | .       | benign (0.159)            | deleterious (0.05) | ENSP00000305119.5:p.Glu1170Lys | LATE  |
| SK-H | RM1 | X;76854962;C;T   | 0.37 | stop gained          | ATRX   | .       | .                         | .                  | ENSP00000362441.4:p.Trp1958Ter | LATE  |
| SK-H | RM1 | 22;19263266;C;T  | 0.21 | missense variant     | CLTCL1 | .       | benign (0.019)            | tolerated (0.24)   | ENSP00000439662.1:p.Val44Ile   | LATE  |
| SK-H | RM1 | 1;36932118;G;A   | 0.17 | missense variant     | CSF3R  | .       | probably damaging (0.978) | deleterious (0)    | ENSP00000355406.4:p.Pro784Leu  | LATE  |
| SK-H | RM1 | 14;95570395;G;A  | 0.25 | missense variant     | DICER1 | .       | benign (0.004)            | tolerated (0.42)   | ENSP00000376783.1:p.Ser1113Phe | LATE  |
| SK-H | RM2 | 14;95577694;C;T  | 0.23 | missense variant     | DICER1 | .       | probably damaging (0.99)  | tolerated (0.19)   | ENSP00000435681.1:p.Arg739Lys  | LATE  |
| SK-H | RM2 | 14;95557560;G;A  | 0.19 | missense variant     | DICER1 | .       | possibly damaging (0.507) | tolerated (0.22)   | ENSP00000376783.1:p.Pro1836Leu | LATE  |
| SK-H | DM  | 19;10922962;C;T  | 0.21 | missense variant     | DNM2   | .       | benign (0.191)            | tolerated (0.07)   | ENSP00000373905.3:p.Thr527Ile  | LATE  |
| SK-H | RM1 | 7;55260507;A;G   | 0.17 | missense variant     | EGFR   | .       | probably damaging (0.946) | deleterious (0)    | ENSP00000415559.1:p.Thr847Ala  | LATE  |
| SK-H | RM1 | 4;187539291;A;G  | 0.20 | missense variant     | FAT1   | .       | benign (0.098)            | tolerated (0.27)   | ENSP00000406229.2:p.Phe2817Leu | LATE  |
| SK-H | RM2 | 4;187541076;C;T  | 0.32 | missense variant     | FAT1   | .       | possibly damaging (0.597) | tolerated (0.22)   | ENSP00000406229.2:p.Asp2222Asn | LATE  |
| SK-H | RM1 | 4;126408731;C;T  | 0.33 | missense variant     | FAT4   | .       | benign (0.015)            | tolerated (0.5)    | ENSP00000335169.5:p.Pro2591Ser | LATE  |
| SK-H | RM2 | 4;126328255;G;A  | 0.24 | missense variant     | FAT4   | .       | benign (0.005)            | tolerated (0.71)   | ENSP00000335169.5:p.Arg141Lys  | LATE  |
| SK-H | DM  | 7;50367354;G;A   | 0.11 | splice donor variant | IKZF1  | .       | .                         | .                  | .                              | LATE  |
| SK-H | RM2 | 12;49443821;C;T  | 0.32 | missense variant     | KMT2D  | .       | benign (0.444)            | .                  | ENSP00000301067.7:p.Glu1184Lys | LATE  |
| SK-H | RM2 | 22;21340186;G;A  | 0.32 | missense variant     | LZTR1  | .       | benign (0.327)            | tolerated (0.1)    | ENSP00000397247.1:p.Arg107Lys  | LATE  |
| SK-H | RM2 | 22;21346659;G;A  | 0.26 | splice donor variant | LZTR1  | 1665940 | .                         | .                  | .                              | LATE  |
| SK-H | RM2 | 16;15870007;G;A  | 0.19 | missense variant     | MYH11  | .       | possibly damaging (0.689) | deleterious (0)    | ENSP00000379616.3:p.Arg280Cys  | LATE  |
| SK-H | DM  | 12;124826588;G;A | 0.36 | missense variant     | NCOR2  | .       | possibly damaging (0.862) | deleterious (0.03) | ENSP00000380513.1:p.Pro1648Ser | LATE  |
| SK-H | RM1 | 12;124813662;G;A | 0.23 | missense variant     | NCOR2  | .       | unknown (0)               | deleterious (0)    | ENSP00000398963.2:p.Pro125Ser  | LATE  |
| SK-H | RM2 | 12;124825216;C;T | 0.39 | missense variant     | NCOR2  | .       | probably damaging (0.996) | deleterious (0)    | ENSP00000380513.1:p.Arg1748His | LATE  |
| SK-H | RM2 | 20;50179159;C;T  | 0.15 | missense variant     | NFATC2 | .       | benign (0.024)            | .                  | ENSP00000396471.1:p.Glu4Lys    | LATE  |
| SK-H | DM  | 5;176636767;C;T  | 0.16 | missense variant     | NSD1   | .       | benign (0.008)            | tolerated (0.18)   | ENSP00000343209.4:p.Pro187Leu  | LATE  |
| SK-H | RM1 | 11;71726660;G;A  | 0.09 | missense variant     | NUMA1  | .       | possibly damaging (0.61)  | tolerated (0.08)   | ENSP00000442936.1:p.Ala630Val  | LATE  |
| SK-H | RM1 | 16;23634381;C;T  | 0.10 | missense variant     | PALB2  | .       | possibly damaging (0.825) | tolerated (0.06)   | ENSP00000261584.4:p.Val969Met  | LATE  |
| SK-H | RM2 | 9;127920588;G;A  | 0.56 | missense variant     | PPP6C  | .       | possibly damaging (0.568) | deleterious (0)    | ENSP00000392147.1:p.Pro141Leu  | LATE  |
| SK-H | RM2 | 6;106536225;C;A  | 0.20 | missense variant     | PRDM1  | .       | probably damaging (0.998) | deleterious (0)    | ENSP00000358087.2:p.Asp28Glu   | LATE  |
| SK-H | DM  | 12;70986100;C;T  | 0.20 | missense variant     | PTPRB  | .       | probably damaging (1)     | deleterious (0)    | ENSP00000447302.1:p.Gly363Asp  | LATE  |
| SK-H | RM1 | 12;70915289;G;A  | 0.07 | missense variant     | PTPRB  | .       | benign (0.002)            | tolerated (0.55)   | ENSP00000447302.1:p.Pro1902Ser | LATE  |
| SK-H | RM2 | 12;70915289;G;A  | 0.33 | missense variant     | PTPRB  | .       | benign (0.002)            | tolerated (0.55)   | ENSP00000447302.1:p.Pro1902Ser | LATE  |
| SK-H | DM  | 1;198668722;C;T  | 0.19 | missense variant     | PTPRC  | .       | benign (0.165)            | tolerated (0.39)   | ENSP00000356337.5:p.Pro44Ser   | LATE  |
| SK-H | DM  | 6;117639351;C;T  | 0.16 | missense variant     | ROS1   | .       | probably damaging (0.968) | deleterious (0.01) | ENSP00000357494.3:p.Ser2002Asn | LATE  |
| SK-H | RM1 | 6;117674161;G;A  | 0.20 | missense variant     | ROS1   | .       | benign (0.038)            | deleterious (0)    | ENSP00000357494.3:p.Pro1438Leu | LATE  |

|      |     |                 |      |                  |        |       |                           |                    |                                |       |
|------|-----|-----------------|------|------------------|--------|-------|---------------------------|--------------------|--------------------------------|-------|
| SK-H | RM1 | 6;117718208;G;A | 0.17 | missense variant | ROS1   | .     | probably damaging (1)     | deleterious (0.01) | ENSP00000357494.3:p.Pro217Ser  | LATE  |
| SK-H | RM2 | 6;117665390;C;T | 0.18 | missense variant | ROS1   | .     | benign (0.007)            | tolerated (0.71)   | ENSP00000357494.3:p.Glu1453Lys | LATE  |
| SK-H | RM2 | 3;47103675;C;T  | 0.57 | missense variant | SETD2  | .     | probably damaging (0.999) | deleterious (0)    | ENSP00000386759.3:p.Gly2091Arg | LATE  |
| SK-H | RM1 | 16;11349151;G;A | 0.14 | missense variant | SOCS1  | .     | benign (0.035)            | tolerated (0.28)   | ENSP00000329418.2:p.Ala62Val   | LATE  |
| SK-H | DM  | 2;214727252;G;C | 0.13 | missense variant | SPAG16 | .     | probably damaging (0.946) | deleterious (0.01) | ENSP00000332592.5:p.Glu372Gln  | LATE  |
| SK-H | RM1 | 2;214149224;G;A | 0.13 | missense variant | SPAG16 | .     | possibly damaging (0.518) | deleterious (0.01) | ENSP00000400847.1:p.Gly6Glu    | LATE  |
| SK-H | RM1 | 10;70332720;C;T | 0.97 | missense variant | TET1   | .     | possibly damaging (0.762) | tolerated (0.12)   | ENSP00000362748.4:p.Pro209Ser  | LATE  |
| SK-H | RM2 | 10;70332720;C;T | 0.43 | missense variant | TET1   | .     | possibly damaging (0.762) | tolerated (0.12)   | ENSP00000362748.4:p.Pro209Ser  | LATE  |
| SK-H | RM1 | 4;106196942;C;T | 0.17 | missense variant | TET2   | .     | benign (0.016)            | tolerated (0.46)   | ENSP00000369351.4:p.Pro1759Ser | LATE  |
| SK-H | RM2 | 4;106164727;G;A | 0.55 | missense variant | TET2   | .     | probably damaging (0.999) | deleterious (0)    | ENSP00000369351.4:p.Val1199Met | LATE  |
| SK-H | RM2 | 17;7578278;G;A  | 0.29 | missense variant | TP53   | 43702 | possibly damaging (0.847) | deleterious (0.04) | ENSP00000398846.2:p.Pro191Ser  | LATE  |
| SK-H | P   | 1;186340104;G;A | 0.67 | stop gained      | TPR    | .     | .                         | .                  | ENSP00000356448.3:p.Gln110Ter  | EARLY |
| SK-H | RM2 | 1;186328986;T;C | 0.27 | missense variant | TPR    | .     | .                         | deleterious (0.01) | ENSP00000356448.3:p.Glu445Gly  | LATE  |
| SK-H | RM1 | 16;2134295;C;T  | 0.10 | missense variant | TSC2   | .     | probably damaging (0.993) | deleterious (0)    | ENSP00000371978.6:p.Pro1243Ser | LATE  |
| SK-H | RM1 | 16;2130291;G;A  | 0.13 | missense variant | TSC2   | .     | benign (0.002)            | tolerated (0.58)   | ENSP00000384468.2:p.Val1131Ile | LATE  |
| SK-H | RM2 | 16;2114273;G;A  | 0.14 | missense variant | TSC2   | .     | possibly damaging (0.622) | deleterious (0.04) | ENSP00000384468.2:p.Glu482Lys  | LATE  |
| SK-H | RM2 | 8;103340042;C;T | 0.23 | missense variant | UBR5   | .     | probably damaging (0.994) | tolerated (0.8)    | ENSP00000427819.1:p.Gly464Glu  | LATE  |
| SK-H | DM  | 16;72993674;C;T | 0.21 | missense variant | ZFHX3  | .     | possibly damaging (0.827) | .                  | ENSP00000268489.5:p.Ser124Asn  | LATE  |
| SK-H | RM1 | 16;72993149;G;A | 0.08 | missense variant | ZFHX3  | .     | probably damaging (0.969) | .                  | ENSP00000268489.5:p.Thr299Ile  | LATE  |

**Supplementary Table 7. Hotspot Mutations.**

| Patient | Sample | Variant         | MAF  | Mutation Type    | Gene   | COSMIC                             | Polyphen2                 | SIFT               | AA Change                    | Time Variant Acquisition |
|---------|--------|-----------------|------|------------------|--------|------------------------------------|---------------------------|--------------------|------------------------------|--------------------------|
| CAS-G   | DM1    | 7;140453136;A:T | 0.67 | missense variant | BRAF   | 476                                | possibly damaging (0.792) | deleterious (0)    | ENSP00000288602.6p.Val600Glu | EARLY                    |
| CAS-G   | DM2    | 7;140453136;A:T | 0.59 | missense variant | BRAF   | 476                                | possibly damaging (0.792) | deleterious (0)    | ENSP00000288602.6p.Val600Glu | EARLY                    |
| CAS-G   | DM3    | 7;140453136;A:T | 0.67 | missense variant | BRAF   | 476                                | possibly damaging (0.792) | deleterious (0)    | ENSP00000288602.6p.Val600Glu | EARLY                    |
| CAS-G   | DM4    | 7;140453136;A:T | 0.67 | missense variant | BRAF   | 476                                | possibly damaging (0.792) | deleterious (0)    | ENSP00000288602.6p.Val600Glu | EARLY                    |
| CAS-G   | DM5    | 7;140453136;A:T | 0.60 | missense variant | BRAF   | 476                                | possibly damaging (0.792) | deleterious (0)    | ENSP00000288602.6p.Val600Glu | EARLY                    |
| CAS-G   | DM6    | 7;140453136;A:T | 0.63 | missense variant | BRAF   | 476                                | possibly damaging (0.792) | deleterious (0)    | ENSP00000288602.6p.Val600Glu | EARLY                    |
| CAS-G   | P      | 7;140453136;A:T | 0.50 | missense variant | BRAF   | 476                                | possibly damaging (0.792) | deleterious (0)    | ENSP00000288602.6p.Val600Glu | EARLY                    |
| CAS-G   | RM     | 7;140453136;A:T | 0.50 | missense variant | BRAF   | 476                                | possibly damaging (0.792) | deleterious (0)    | ENSP00000288602.6p.Val600Glu | EARLY                    |
| CAS-G   | DM6    | 5;167988433;T:A | 0.08 | missense variant | PANK3  | 225568                             | possibly damaging (0.833) | deleterious (0)    | ENSP00000239231.6p.Ile301Phe | LATE                     |
| CAS-G   | DM4    | 3;178936091;G:A | 0.08 | missense variant | PIK3CA | 763,125370                         | probably damaging (0.959) | deleterious (0.01) | ENSP00000263967.3p.Glu545Lys | LATE                     |
| CAS-G   | DM6    | 3;178936082;G:A | 0.21 | missense variant | PIK3CA | 760,125369                         | probably damaging (0.96)  | tolerated (0.11)   | ENSP00000263967.3p.Glu542Lys | LATE                     |
| CAS-D   | DM1    | 7;140453136;A:T | 0.58 | missense variant | BRAF   | 476                                | possibly damaging (0.792) | deleterious (0)    | ENSP00000288602.6p.Val600Glu | EARLY                    |
| CAS-D   | DM2    | 7;140453136;A:T | 0.50 | missense variant | BRAF   | 476                                | possibly damaging (0.792) | deleterious (0)    | ENSP00000288602.6p.Val600Glu | EARLY                    |
| CAS-D   | DM3    | 7;140453136;A:T | 0.47 | missense variant | BRAF   | 476                                | possibly damaging (0.792) | deleterious (0)    | ENSP00000288602.6p.Val600Glu | EARLY                    |
| CAS-D   | DM4    | 7;140453136;A:T | 0.50 | missense variant | BRAF   | 476                                | possibly damaging (0.792) | deleterious (0)    | ENSP00000288602.6p.Val600Glu | EARLY                    |
| CAS-D   | DM5    | 7;140453136;A:T | 0.50 | missense variant | BRAF   | 476                                | possibly damaging (0.792) | deleterious (0)    | ENSP00000288602.6p.Val600Glu | EARLY                    |
| CAS-D   | DM6    | 7;140453136;A:T | 0.49 | missense variant | BRAF   | 476                                | possibly damaging (0.792) | deleterious (0)    | ENSP00000288602.6p.Val600Glu | EARLY                    |
| CAS-D   | P1     | 7;140453136;A:T | 0.45 | missense variant | BRAF   | 476                                | possibly damaging (0.792) | deleterious (0)    | ENSP00000288602.6p.Val600Glu | EARLY                    |
| CAS-D   | P2     | 7;140453136;A:T | 0.44 | missense variant | BRAF   | 476                                | possibly damaging (0.792) | deleterious (0)    | ENSP00000288602.6p.Val600Glu | EARLY                    |
| CAS-D   | P3     | 7;140453136;A:T | 0.50 | missense variant | BRAF   | 476                                | possibly damaging (0.792) | deleterious (0)    | ENSP00000288602.6p.Val600Glu | EARLY                    |
| CAS-D   | RM     | 7;140453136;A:T | 0.50 | missense variant | BRAF   | 476                                | possibly damaging (0.792) | deleterious (0)    | ENSP00000288602.6p.Val600Glu | EARLY                    |
| CAS-D   | DM1    | 17;7577539;G:A  | 1.00 | missense variant | TP53   | 10656,120007,120005,1640831,120006 | probably damaging (1)     | deleterious (0)    | ENSP00000398846.2p.Arg248Trp | EARLY                    |
| CAS-D   | DM2    | 17;7577539;G:A  | 0.54 | missense variant | TP53   | 10656,120007,120005,1640831,120006 | probably damaging (1)     | deleterious (0)    | ENSP00000398846.2p.Arg248Trp | EARLY                    |
| CAS-D   | DM3    | 17;7577539;G:A  | 0.89 | missense variant | TP53   | 10656,120007,120005,1640831,120006 | probably damaging (1)     | deleterious (0)    | ENSP00000398846.2p.Arg248Trp | EARLY                    |
| CAS-D   | DM4    | 17;7577539;G:A  | 0.91 | missense variant | TP53   | 10656,120007,120005,1640831,120006 | probably damaging (1)     | deleterious (0)    | ENSP00000398846.2p.Arg248Trp | EARLY                    |
| CAS-D   | DM5    | 17;7577539;G:A  | 1.00 | missense variant | TP53   | 10656,120007,120005,1640831,120006 | probably damaging (1)     | deleterious (0)    | ENSP00000398846.2p.Arg248Trp | EARLY                    |
| CAS-D   | DM6    | 17;7577539;G:A  | 0.79 | missense variant | TP53   | 10656,120007,120005,1640831,120006 | probably damaging (1)     | deleterious (0)    | ENSP00000398846.2p.Arg248Trp | EARLY                    |
| CAS-D   | P1     | 17;7577539;G:A  | 0.64 | missense variant | TP53   | 10656,120007,120005,1640831,120006 | probably damaging (1)     | deleterious (0)    | ENSP00000398846.2p.Arg248Trp | EARLY                    |
| CAS-D   | P2     | 17;7577539;G:A  | 1.00 | missense variant | TP53   | 10656,120007,120005,1640831,120006 | probably damaging (1)     | deleterious (0)    | ENSP00000398846.2p.Arg248Trp | EARLY                    |
| CAS-D   | P3     | 17;7577539;G:A  | 0.54 | missense variant | TP53   | 10656,120007,120005,1640831,120006 | probably damaging (1)     | deleterious (0)    | ENSP00000398846.2p.Arg248Trp | EARLY                    |

|       |     |                 |      |                  |        |                                    |                           |                    |                                |       |
|-------|-----|-----------------|------|------------------|--------|------------------------------------|---------------------------|--------------------|--------------------------------|-------|
| CAS-D | RM  | 17;7577539;G;A  | 0.91 | missense variant | TP53   | 10656,120007,120005,1640831,120006 | probably damaging (1)     | deleterious (0)    | ENSP00000398846.2;p.Arg248Trp  | EARLY |
| CAS-F | DM1 | 7;140453136;A;T | 0.71 | missense variant | BRAF   | 476                                | possibly damaging (0.792) | deleterious (0)    | ENSP00000288602.6;p.Val600Glu  | EARLY |
| CAS-F | DM2 | 7;140453136;A;T | 0.80 | missense variant | BRAF   | 476                                | possibly damaging (0.792) | deleterious (0)    | ENSP00000288602.6;p.Val600Glu  | EARLY |
| CAS-F | DM3 | 7;140453136;A;T | 0.69 | missense variant | BRAF   | 476                                | possibly damaging (0.792) | deleterious (0)    | ENSP00000288602.6;p.Val600Glu  | EARLY |
| CAS-F | RM1 | 7;140453136;A;T | 0.72 | missense variant | BRAF   | 476                                | possibly damaging (0.792) | deleterious (0)    | ENSP00000288602.6;p.Val600Glu  | EARLY |
| CAS-F | RM2 | 7;140453136;A;T | 0.75 | missense variant | BRAF   | 476                                | possibly damaging (0.792) | deleterious (0)    | ENSP00000288602.6;p.Val600Glu  | EARLY |
| CAS-F | RM3 | 7;140453136;A;T | 0.61 | missense variant | BRAF   | 476                                | possibly damaging (0.792) | deleterious (0)    | ENSP00000288602.6;p.Val600Glu  | EARLY |
| CAS-F | DM1 | 9;21971017;G;A  | 1.00 | missense variant | CDKN2A | 753743,753742,12476                | probably damaging (1)     | deleterious (0)    | ENSP00000307101.5;p.Pro114Leu  | EARLY |
| CAS-F | DM2 | 9;21971017;G;A  | 1.00 | missense variant | CDKN2A | 753743,753742,12476                | probably damaging (1)     | deleterious (0)    | ENSP00000307101.5;p.Pro114Leu  | EARLY |
| CAS-F | DM3 | 9;21971017;G;A  | 0.90 | missense variant | CDKN2A | 753743,753742,12476                | probably damaging (1)     | deleterious (0)    | ENSP00000307101.5;p.Pro114Leu  | EARLY |
| CAS-F | RM1 | 9;21971017;G;A  | 1.00 | missense variant | CDKN2A | 753743,753742,12476                | probably damaging (1)     | deleterious (0)    | ENSP00000307101.5;p.Pro114Leu  | EARLY |
| CAS-F | RM2 | 9;21971017;G;A  | 1.00 | missense variant | CDKN2A | 753743,753742,12476                | probably damaging (1)     | deleterious (0)    | ENSP00000307101.5;p.Pro114Leu  | EARLY |
| CAS-F | RM3 | 9;21971017;G;A  | 1.00 | missense variant | CDKN2A | 753743,753742,12476                | probably damaging (1)     | deleterious (0)    | ENSP00000307101.5;p.Pro114Leu  | EARLY |
| CAS-F | DM1 | 2;138373853;G;A | 0.35 | missense variant | THSD7B | .                                  | unknown (0)               | tolerated (1)      | ENSP00000272643.3;p.Glu1181Lys | EARLY |
| CAS-F | DM2 | 2;138373853;G;A | 0.50 | missense variant | THSD7B | .                                  | unknown (0)               | tolerated (1)      | ENSP00000272643.3;p.Glu1181Lys | EARLY |
| CAS-F | DM3 | 2;138373853;G;A | 0.50 | missense variant | THSD7B | .                                  | unknown (0)               | tolerated (1)      | ENSP00000272643.3;p.Glu1181Lys | EARLY |
| CAS-F | RM1 | 2;138373853;G;A | 0.36 | missense variant | THSD7B | .                                  | unknown (0)               | tolerated (1)      | ENSP00000272643.3;p.Glu1181Lys | EARLY |
| CAS-F | RM2 | 2;138373853;G;A | 0.50 | missense variant | THSD7B | .                                  | unknown (0)               | tolerated (1)      | ENSP00000272643.3;p.Glu1181Lys | EARLY |
| CAS-F | RM3 | 2;138373853;G;A | 0.29 | missense variant | THSD7B | .                                  | unknown (0)               | tolerated (1)      | ENSP00000272643.3;p.Glu1181Lys | EARLY |
| CAS-E | DM1 | 7;140453136;A;T | 0.50 | missense variant | BRAF   | 476                                | possibly damaging (0.792) | deleterious (0)    | ENSP00000288602.6;p.Val600Glu  | EARLY |
| CAS-E | DM2 | 7;140453136;A;T | 0.36 | missense variant | BRAF   | 476                                | possibly damaging (0.792) | deleterious (0)    | ENSP00000288602.6;p.Val600Glu  | EARLY |
| CAS-E | DM3 | 7;140453136;A;T | 0.34 | missense variant | BRAF   | 476                                | possibly damaging (0.792) | deleterious (0)    | ENSP00000288602.6;p.Val600Glu  | EARLY |
| CAS-E | DM4 | 7;140453136;A;T | 0.44 | missense variant | BRAF   | 476                                | possibly damaging (0.792) | deleterious (0)    | ENSP00000288602.6;p.Val600Glu  | EARLY |
| CAS-E | DM5 | 7;140453136;A;T | 0.44 | missense variant | BRAF   | 476                                | possibly damaging (0.792) | deleterious (0)    | ENSP00000288602.6;p.Val600Glu  | EARLY |
| CAS-E | P   | 7;140453136;A;T | 0.41 | missense variant | BRAF   | 476                                | possibly damaging (0.792) | deleterious (0)    | ENSP00000288602.6;p.Val600Glu  | EARLY |
| CAS-E | RM  | 7;140453136;A;T | 0.50 | missense variant | BRAF   | 476                                | possibly damaging (0.792) | deleterious (0)    | ENSP00000288602.6;p.Val600Glu  | EARLY |
| CAS-E | DM2 | 1;115256530;G;T | 0.20 | missense variant | NRAS   | 580                                | benign (0.045)            | deleterious (0.01) | ENSP00000358548.4;p.Gln61Lys   | LATE  |
| CAS-E | DM3 | 1;115256530;G;T | 0.13 | missense variant | NRAS   | 580                                | benign (0.045)            | deleterious (0.01) | ENSP00000358548.4;p.Gln61Lys   | LATE  |
| CAS-E | DM5 | 1;115256530;G;T | 0.15 | missense variant | NRAS   | 580                                | benign (0.045)            | deleterious (0.01) | ENSP00000358548.4;p.Gln61Lys   | LATE  |
| CAS-E | DM1 | 7;6426892;C;T   | 1.00 | missense variant | RAC1   | 125734,1167878                     | probably damaging (0.95)  | deleterious (0.02) | ENSP00000258737.7;p.Pro29Ser   | EARLY |
| CAS-E | DM2 | 7;6426892;C;T   | 0.94 | missense variant | RAC1   | 125734,1167878                     | probably damaging (0.95)  | deleterious (0.02) | ENSP00000258737.7;p.Pro29Ser   | EARLY |
| CAS-E | DM3 | 7;6426892;C;T   | 1.00 | missense variant | RAC1   | 125734,1167878                     | probably damaging (0.95)  | deleterious (0.02) | ENSP00000258737.7;p.Pro29Ser   | EARLY |
| CAS-E | DM4 | 7;6426892;C;T   | 1.00 | missense variant | RAC1   | 125734,1167878                     | probably damaging (0.95)  | deleterious (0.02) | ENSP00000258737.7;p.Pro29Ser   | EARLY |

|       |     |                 |      |                  |        |                |                           |                    |                               |       |
|-------|-----|-----------------|------|------------------|--------|----------------|---------------------------|--------------------|-------------------------------|-------|
| CAS-E | DM5 | 7;6426892;C;T   | 0.98 | missense variant | RAC1   | 125734,1167878 | probably damaging (0.95)  | deleterious (0.02) | ENSP00000258737.7.p.Pro29Ser  | EARLY |
| CAS-E | P   | 7;6426892;C;T   | 1.00 | missense variant | RAC1   | 125734,1167878 | probably damaging (0.95)  | deleterious (0.02) | ENSP00000258737.7.p.Pro29Ser  | EARLY |
| CAS-E | RM  | 7;6426892;C;T   | 1.00 | missense variant | RAC1   | 125734,1167878 | probably damaging (0.95)  | deleterious (0.02) | ENSP00000258737.7.p.Pro29Ser  | EARLY |
| CAS-A | DM1 | 7;140453136;A;T | 0.51 | missense variant | BRAF   | 476            | possibly damaging (0.792) | deleterious (0)    | ENSP00000288602.6.p.Val600Glu | EARLY |
| CAS-A | DM2 | 7;140453136;A;T | 0.67 | missense variant | BRAF   | 476            | possibly damaging (0.792) | deleterious (0)    | ENSP00000288602.6.p.Val600Glu | EARLY |
| CAS-A | DM3 | 7;140453136;A;T | 0.60 | missense variant | BRAF   | 476            | possibly damaging (0.792) | deleterious (0)    | ENSP00000288602.6.p.Val600Glu | EARLY |
| CAS-A | DM4 | 7;140453136;A;T | 0.67 | missense variant | BRAF   | 476            | possibly damaging (0.792) | deleterious (0)    | ENSP00000288602.6.p.Val600Glu | EARLY |
| CAS-A | RM1 | 7;140453136;A;T | 0.79 | missense variant | BRAF   | 476            | possibly damaging (0.792) | deleterious (0)    | ENSP00000288602.6.p.Val600Glu | EARLY |
| CAS-A | RM2 | 7;140453136;A;T | 0.73 | missense variant | BRAF   | 476            | possibly damaging (0.792) | deleterious (0)    | ENSP00000288602.6.p.Val600Glu | EARLY |
| CAS-A | RM3 | 7;140453136;A;T | 0.83 | missense variant | BRAF   | 476            | possibly damaging (0.792) | deleterious (0)    | ENSP00000288602.6.p.Val600Glu | EARLY |
| CAS-A | DM1 | 1;115256530;G;T | 0.81 | missense variant | NRAS   | 580            | benign (0.045)            | deleterious (0.01) | ENSP00000358548.4.p.Gln61Lys  | LATE  |
| CAS-A | DM2 | 1;115256530;G;T | 0.75 | missense variant | NRAS   | 580            | benign (0.045)            | deleterious (0.01) | ENSP00000358548.4.p.Gln61Lys  | LATE  |
| CAS-A | DM3 | 1;115256530;G;T | 0.23 | missense variant | NRAS   | 580            | benign (0.045)            | deleterious (0.01) | ENSP00000358548.4.p.Gln61Lys  | LATE  |
| CAS-A | DM4 | 1;115256530;G;T | 0.74 | missense variant | NRAS   | 580            | benign (0.045)            | deleterious (0.01) | ENSP00000358548.4.p.Gln61Lys  | LATE  |
| CAS-A | DM1 | 3;178936094;C;A | 0.52 | missense variant | PIK3CA | 766,255876     | probably damaging (0.952) | tolerated (0.23)   | ENSP00000263967.3.p.Gln546Lys | EARLY |
| CAS-A | DM2 | 3;178936094;C;A | 0.19 | missense variant | PIK3CA | 766,255876     | probably damaging (0.952) | tolerated (0.23)   | ENSP00000263967.3.p.Gln546Lys | EARLY |
| CAS-A | DM3 | 3;178936094;C;A | 0.16 | missense variant | PIK3CA | 766,255876     | probably damaging (0.952) | tolerated (0.23)   | ENSP00000263967.3.p.Gln546Lys | EARLY |
| CAS-A | DM4 | 3;178936094;C;A | 0.44 | missense variant | PIK3CA | 766,255876     | probably damaging (0.952) | tolerated (0.23)   | ENSP00000263967.3.p.Gln546Lys | EARLY |
| CAS-A | RM2 | 3;178936094;C;A | 0.19 | missense variant | PIK3CA | 766,255876     | probably damaging (0.952) | tolerated (0.23)   | ENSP00000263967.3.p.Gln546Lys | EARLY |
| CAS-B | DM1 | 7;140453136;A;T | 0.67 | missense variant | BRAF   | 476            | possibly damaging (0.792) | deleterious (0)    | ENSP00000288602.6.p.Val600Glu | EARLY |
| CAS-B | DM2 | 7;140453136;A;T | 0.71 | missense variant | BRAF   | 476            | possibly damaging (0.792) | deleterious (0)    | ENSP00000288602.6.p.Val600Glu | EARLY |
| CAS-B | DM3 | 7;140453136;A;T | 0.61 | missense variant | BRAF   | 476            | possibly damaging (0.792) | deleterious (0)    | ENSP00000288602.6.p.Val600Glu | EARLY |
| CAS-B | DM4 | 7;140453136;A;T | 0.61 | missense variant | BRAF   | 476            | possibly damaging (0.792) | deleterious (0)    | ENSP00000288602.6.p.Val600Glu | EARLY |
| CAS-B | DM5 | 7;140453136;A;T | 0.68 | missense variant | BRAF   | 476            | possibly damaging (0.792) | deleterious (0)    | ENSP00000288602.6.p.Val600Glu | EARLY |
| CAS-B | P   | 7;140453136;A;T | 0.66 | missense variant | BRAF   | 476            | possibly damaging (0.792) | deleterious (0)    | ENSP00000288602.6.p.Val600Glu | EARLY |
| CAS-B | RM1 | 7;140453136;A;T | 0.67 | missense variant | BRAF   | 476            | possibly damaging (0.792) | deleterious (0)    | ENSP00000288602.6.p.Val600Glu | EARLY |
| CAS-B | RM2 | 7;140453136;A;T | 0.66 | missense variant | BRAF   | 476            | possibly damaging (0.792) | deleterious (0)    | ENSP00000288602.6.p.Val600Glu | EARLY |
| CAS-B | RM3 | 7;140453136;A;T | 0.66 | missense variant | BRAF   | 476            | possibly damaging (0.792) | deleterious (0)    | ENSP00000288602.6.p.Val600Glu | EARLY |
| CAS-B | RM2 | 5;167988433;T;A | 0.3  | missense variant | PANK3  | 225568         | possibly damaging (0.833) | deleterious (0)    | ENSP00000239231.6.p.Ile301Phe | LATE  |
| CAS-B | DM1 | 5;167988433;T;A | 0.39 | missense variant | PANK3  | 225568         | possibly damaging (0.833) | deleterious (0)    | ENSP00000239231.6.p.Ile301Phe | LATE  |
| CAS-B | DM3 | 5;167988433;T;A | 0.42 | missense variant | PANK3  | 225568         | possibly damaging (0.833) | deleterious (0)    | ENSP00000239231.6.p.Ile301Phe | LATE  |
| CAS-C | DM1 | 7;140453134;T;C | 0.89 | missense variant | BRAF   | 478            | benign (0.195)            | deleterious (0)    | ENSP00000288602.6.p.Lys601Glu | EARLY |
| CAS-C | DM2 | 7;140453134;T;C | 0.77 | missense variant | BRAF   | 478            | benign (0.195)            | deleterious (0)    | ENSP00000288602.6.p.Lys601Glu | EARLY |

|       |     |                 |      |                  |        |               |                           |                    |                              |       |
|-------|-----|-----------------|------|------------------|--------|---------------|---------------------------|--------------------|------------------------------|-------|
| CAS-C | DM3 | 7;140453134;T;C | 0.86 | missense variant | BRAF   | 478           | benign (0.195)            | deleterious (0)    | ENSP00000288602.6p.Lys601Glu | EARLY |
| CAS-C | DM4 | 7;140453134;T;C | 0.86 | missense variant | BRAF   | 478           | benign (0.195)            | deleterious (0)    | ENSP00000288602.6p.Lys601Glu | EARLY |
| CAS-C | DM5 | 7;140453134;T;C | 0.78 | missense variant | BRAF   | 478           | benign (0.195)            | deleterious (0)    | ENSP00000288602.6p.Lys601Glu | EARLY |
| CAS-C | DM6 | 7;140453134;T;C | 0.85 | missense variant | BRAF   | 478           | benign (0.195)            | deleterious (0)    | ENSP00000288602.6p.Lys601Glu | EARLY |
| CAS-C | P   | 7;140453134;T;C | 0.83 | missense variant | BRAF   | 478           | benign (0.195)            | deleterious (0)    | ENSP00000288602.6p.Lys601Glu | EARLY |
| CAS-C | DM4 | 3;41266136;T;C  | 0.49 | missense variant | CTNNB1 | 5663          | probably damaging (0.939) | deleterious (0)    | ENSP00000401599.1p.Ser45Pro  | LATE  |
| CAS-C | DM5 | 3;41266136;T;C  | 0.46 | missense variant | CTNNB1 | 5663          | probably damaging (0.939) | deleterious (0)    | ENSP00000401599.1p.Ser45Pro  | LATE  |
| CAS-C | DM6 | 3;41266136;T;C  | 0.50 | missense variant | CTNNB1 | 5663          | probably damaging (0.939) | deleterious (0)    | ENSP00000401599.1p.Ser45Pro  | LATE  |
| ETH-E | DM1 | 7;140453136;A;T | 0.50 | missense variant | BRAF   | 476           | possibly damaging (0.792) | deleterious (0)    | ENSP00000288602.6p.Val600Glu | EARLY |
| ETH-E | DM2 | 7;140453136;A;T | 0.50 | missense variant | BRAF   | 476           | possibly damaging (0.792) | deleterious (0)    | ENSP00000288602.6p.Val600Glu | EARLY |
| ETH-E | DM3 | 7;140453136;A;T | 0.50 | missense variant | BRAF   | 476           | possibly damaging (0.792) | deleterious (0)    | ENSP00000288602.6p.Val600Glu | EARLY |
| ETH-E | P   | 7;140453136;A;T | 0.48 | missense variant | BRAF   | 476           | possibly damaging (0.792) | deleterious (0)    | ENSP00000288602.6p.Val600Glu | EARLY |
| ETH-E | RM  | 7;140453136;A;T | 0.47 | missense variant | BRAF   | 476           | possibly damaging (0.792) | deleterious (0)    | ENSP00000288602.6p.Val600Glu | EARLY |
| ETH-J | DM1 | 1;115256529;T;C | 0.92 | missense variant | NRAS   | 584           | benign (0.006)            | deleterious (0.03) | ENSP00000358548.4p.Gln61Arg  | EARLY |
| ETH-J | DM2 | 1;115256529;T;C | 0.98 | missense variant | NRAS   | 584           | benign (0.006)            | deleterious (0.03) | ENSP00000358548.4p.Gln61Arg  | EARLY |
| ETH-J | DM3 | 1;115256529;T;C | 0.96 | missense variant | NRAS   | 584           | benign (0.006)            | deleterious (0.03) | ENSP00000358548.4p.Gln61Arg  | EARLY |
| ETH-J | P1  | 1;115256529;T;C | 0.91 | missense variant | NRAS   | 584           | benign (0.006)            | deleterious (0.03) | ENSP00000358548.4p.Gln61Arg  | EARLY |
| ETH-J | P2  | 1;115256529;T;C | 1.00 | missense variant | NRAS   | 584           | benign (0.006)            | deleterious (0.03) | ENSP00000358548.4p.Gln61Arg  | EARLY |
| ETH-J | RM  | 1;115256529;T;C | 0.98 | missense variant | NRAS   | 584           | benign (0.006)            | deleterious (0.03) | ENSP00000358548.4p.Gln61Arg  | EARLY |
| MI-F  | DM  | 12;46230641;C;T | 0.33 | missense variant | ARID2  | 1167991       | probably damaging (0.997) | deleterious (0)    | ENSP00000335044.6p.Ser297Phe | EARLY |
| MI-F  | P   | 12;46230641;C;T | 0.30 | missense variant | ARID2  | 1167991       | probably damaging (0.997) | deleterious (0)    | ENSP00000335044.6p.Ser297Phe | EARLY |
| MI-F  | RM1 | 12;46230641;C;T | 0.33 | missense variant | ARID2  | 1167991       | probably damaging (0.997) | deleterious (0)    | ENSP00000335044.6p.Ser297Phe | EARLY |
| MI-F  | RM2 | 12;46230641;C;T | 0.30 | missense variant | ARID2  | 1167991       | probably damaging (0.997) | deleterious (0)    | ENSP00000335044.6p.Ser297Phe | EARLY |
| MI-F  | DM  | 12;21918682;C;T | 0.83 | missense variant | KCNJ8  | .             | possibly damaging (0.538) | deleterious (0)    | ENSP00000240662.2p.Gly417Glu | EARLY |
| MI-F  | P   | 12;21918682;C;T | 1.00 | missense variant | KCNJ8  | .             | possibly damaging (0.538) | deleterious (0)    | ENSP00000240662.2p.Gly417Glu | EARLY |
| MI-F  | RM1 | 12;21918682;C;T | 1.00 | missense variant | KCNJ8  | .             | possibly damaging (0.538) | deleterious (0)    | ENSP00000240662.2p.Gly417Glu | EARLY |
| MI-F  | RM2 | 12;21918682;C;T | 0.98 | missense variant | KCNJ8  | .             | possibly damaging (0.538) | deleterious (0)    | ENSP00000240662.2p.Gly417Glu | EARLY |
| MI-F  | DM  | 15;40675107;C;T | 0.67 | missense variant | KNSTRN | 140056        | probably damaging (0.983) | deleterious (0.01) | ENSP00000453213.1p.Ser24Phe  | EARLY |
| MI-F  | P   | 15;40675107;C;T | 0.19 | missense variant | KNSTRN | 140056        | probably damaging (0.983) | deleterious (0.01) | ENSP00000453213.1p.Ser24Phe  | EARLY |
| MI-F  | RM1 | 15;40675107;C;T | 0.38 | missense variant | KNSTRN | 140056        | probably damaging (0.983) | deleterious (0.01) | ENSP00000453213.1p.Ser24Phe  | EARLY |
| MI-F  | RM2 | 15;40675107;C;T | 0.50 | missense variant | KNSTRN | 140056        | probably damaging (0.983) | deleterious (0.01) | ENSP00000453213.1p.Ser24Phe  | EARLY |
| MI-F  | DM  | 12;25378647;T;A | 1.00 | missense variant | KRAS   | 28519,1562192 | benign (0.185)            | deleterious (0.01) | ENSP00000308495.3p.Lys117Asn | EARLY |
| MI-F  | P   | 12;25378647;T;A | 1.00 | missense variant | KRAS   | 28519,1562192 | benign (0.185)            | deleterious (0.01) | ENSP00000308495.3p.Lys117Asn | EARLY |



|      |     |                     |      |                     |            |               |                              |                    |                                   |       |
|------|-----|---------------------|------|---------------------|------------|---------------|------------------------------|--------------------|-----------------------------------|-------|
| MI-F | RM1 | 12;25378647;T<br>;A | 1.00 | missense<br>variant | KRAS       | 28519,1562192 | benign (0.185)               | deleterious (0.01) | ENSP00000308495<br>.3:p.Lys117Asn | EARLY |
| MI-F | RM2 | 12;25378647;T<br>;A | 1.00 | missense<br>variant | KRAS       | 28519,1562192 | benign (0.185)               | deleterious (0.01) | ENSP00000308495<br>.3:p.Lys117Asn | EARLY |
| MI-F | DM  | 6;31940123;G;<br>A  | 0.27 | missense<br>variant | STK19      | 21037,226579  | benign (0.108)               | deleterious (0.03) | ENSP00000364482<br>.2:p.Asp89Asn  | EARLY |
| MI-F | P   | 6;31940123;G;<br>A  | 0.23 | missense<br>variant | STK19      | 21037,226579  | benign (0.108)               | deleterious (0.03) | ENSP00000364482<br>.2:p.Asp89Asn  | EARLY |
| MI-F | RM1 | 6;31940123;G;<br>A  | 0.25 | missense<br>variant | STK19      | 21037,226579  | benign (0.108)               | deleterious (0.03) | ENSP00000364482<br>.2:p.Asp89Asn  | EARLY |
| MI-F | RM2 | 6;31940123;G;<br>A  | 0.21 | missense<br>variant | STK19      | 21037,226579  | benign (0.108)               | deleterious (0.03) | ENSP00000364482<br>.2:p.Asp89Asn  | EARLY |
| SK-G | DM  | 1;115256530;<br>G;T | 0.50 | missense<br>variant | NRAS       | 580           | benign (0.045)               | deleterious (0.01) | ENSP00000358548<br>.4:p.Gln61Lys  | EARLY |
| SK-G | P   | 1;115256530;<br>G;T | 0.45 | missense<br>variant | NRAS       | 580           | benign (0.045)               | deleterious (0.01) | ENSP00000358548<br>.4:p.Gln61Lys  | EARLY |
| SK-G | RM  | 1;115256530;<br>G;T | 0.50 | missense<br>variant | NRAS       | 580           | benign (0.045)               | deleterious (0.01) | ENSP00000358548<br>.4:p.Gln61Lys  | EARLY |
| SK-G | RM  | 3;178921549;T<br>;G | 0.50 | missense<br>variant | PIK3C<br>A | 22540,258749  | probably damaging<br>(0.987) | deleterious (0)    | ENSP00000263967<br>.3:p.Val344Gly | LATE  |

**Supplementary Table 8. Neoantigenic mutations lost**

| Patient | LOH Event | N Mutations Deleted | Mutations Deleted (Early Stage MAF)                                                                                                                                                                                                                                    | Neoantigens Deleted                                                                                                                                                                                                                                                                                                                                                                                                                 |
|---------|-----------|---------------------|------------------------------------------------------------------------------------------------------------------------------------------------------------------------------------------------------------------------------------------------------------------------|-------------------------------------------------------------------------------------------------------------------------------------------------------------------------------------------------------------------------------------------------------------------------------------------------------------------------------------------------------------------------------------------------------------------------------------|
| CAS-E   | 11q       | 10                  | 11:101827497;C:T (0.32)<br>11:101981760;T;G (0.32)<br>11:101985040;T;G (0.47)<br>11:101985043;T;G (0.45)<br>11:102098225;A;G (0.39)<br>11:102098226;G;C (0.39)<br>11:64005009;C;T (0.37)<br>11:64665339;G;A (0.40)<br>11:65651878;G;A (0.31)<br>11:66392293;T;A (0.27) | KIAA1377;11-101827497;PVSSSFMIFFSPPILH<br>YAP1;11-101981760;QIVHVRGDAETDLEALF<br>YAP1;11-101985040;PTAQHLRQAAFEIPDDV<br>YAP1;11-101985043;TAQHLRQAAFEIPDDVP<br>YAP1;11-102098225;GTYHSRDEATDGLSMS<br>YAP1;11-102098226;GTYHSRDEATDGLSMS<br>VEGFB;11-64005009;PDSRPLRCSRCTQHHQR<br>ATG2A;11-64665339;PGGGHSPSPDQOPIYF<br>FIBP;11-65651878;NQYASVHFLDGFGR<br>FIBP;11-65651878;NQYASVHFLDGFGRHQA<br>RBM14;11-66392293;AQPSALATSYGGQAAA |
| CAS-F   | 15        | 7                   | 15:49085622;A;G (0.36)<br>15:71184539;T;C (0.34)<br>15:77320248;C;T (0.37)<br>15:79058378;A;G (0.19)<br>15:85400577;C;T (0.47)<br>15:91292754;G;A (0.14)<br>15:75982058;T;A (0.22)                                                                                     | CEP152;15-49085622;NMQIQLQALNKAKERQ<br>THAP10;15-71184539;GKSLFRFPEDRAVRLW<br>PSTPIP1;15-77320248;SKLSLYKVMESKKTIE<br>ADAMT57;15-79058378;WPTVGVASPLPPIAPL<br>ALPK3;15-85400577;QEVPTMPSFPGTGLTAS<br>BLM;15-91292754;PNTTNQQRKDFFFKNAP<br>CSPG4; 15-75982058;GGTVWLEWHVQPTLDDL                                                                                                                                                      |
| SK-G    | X         | 6                   | X:10102557;G;T (0.27)<br>X:101910581;C;G (0.50)<br>X:153069521;C;T (0.44)<br>X:18283733;C;T (0.40)<br>X:71821870;G;A (0.50)<br>X:79945559;T;C (0.50)                                                                                                                   | WWC3;X-10102557;ERPSRRARVSPFVRSQT<br>GPRASPI;X-101910581;PGAEEETILGSWFWAEN<br>PDZD4;X-153069521;AKFRSLSRNPEAGRROH<br>SCML2;X-18283733;SSVKNITPKKKGPNSGK<br>PHKA1;X-71821870;SEIKQVEFCRLSISAES<br>BRWD3;X-79945559;SALMWEVRCIEHNARTF                                                                                                                                                                                                 |
| CAS-F   | 8p        | 5                   | 8:17486239;C;T (0.43)<br>8:38283717;G;A (0.59)<br>8:30553945;G;A (0.5)<br>8:30974004;G;A (0.5)<br>8:22069129;C;T (0.18)                                                                                                                                                | PDGFRL;8-17486239;GVVYCRAEVGGRSQISV<br>FGFR1;8-38283717;HIMDSVVPFDKGNITC<br>FGFR1;8-38283717;HIMDSVVPFDKGNITC<br>GSR;8-30553945;HCCGDRDVSVPGF<br>WRN; 8-30974004;HAGMSFSTKDIHHRFV<br>BMP1;8-22069129;GPPEEYVSVDGSLVKF                                                                                                                                                                                                               |
| CAS-D   | 1q        | 4                   | 1:196716355;G;A (0.42)<br>1:196716356;G;T (0.42)<br>1:207753729;G;A (0.47)<br>1:207789988;C;T (0.50)                                                                                                                                                                   | CFH;1-196716355;ESVEFVCKHGRLSSRS<br>CFH;1-196716356;ESVEFVCKHGRLSSRS<br>CR1;1-207753729;ASLHCTPQEDWSPAPR<br>CR1;1-207789988;TGTPFGDISYKKEISYA                                                                                                                                                                                                                                                                                       |
| CAS-D   | 3q        | 4                   | 3:157920867;G;T (0.50)<br>3:168806865;C;T (0.48)<br>3:170893054;T;G (0.50)<br>3:173998974;C;T (0.50)                                                                                                                                                                   | RSRC1;3-157920867;SKSRTRRSSSRPRLRSH<br>MECOM;3-168806865;MEDNQYSETELSFSFST<br>TNK;3-170893054;PRNPAPRLQSKKWSKFF<br>NLGN1;3-173998974;TPNITMISNTPIGQIP                                                                                                                                                                                                                                                                               |
| CAS-D   | 5         | 3                   | 5:1463843;G;A (0.50)<br>5:76003085;G;A (0.50)<br>5:87492143;A;T (0.50)                                                                                                                                                                                                 | LPCAT1;5-1463843;AETSPAPISNGFCADF5<br>IQGAP2;5-76003085;MKMFDFKVMNVLNLIYL<br>TMEM161B;5-87492143;ALSSLNKIYTPLLFRGL                                                                                                                                                                                                                                                                                                                  |
| SK-H    | 12        | 3                   | 12:42499802;C;A(0.4)<br>12:46230743;G;A(0.39)<br>12:94543124;G;A(0.04)                                                                                                                                                                                                 | GXYLT1;12-42499802;ILFLRPVDYIWSLLKKF<br>ARID2;12-46230743;HFISLRQLDLDTLGNIA<br>PLXNC1;12-94543124;GLGGLLTDWTFDRGAC                                                                                                                                                                                                                                                                                                                  |
| SK-G    | 8         | 2                   | 8:108334329;C;T (0.50)<br>8:21768354;C;T (0.41)                                                                                                                                                                                                                        | ANGPT1;8-108334329;LLEHKILEIEGKHKEEL<br>DOK2;8-21768354;AVTVGPHKKFAVTRPT                                                                                                                                                                                                                                                                                                                                                            |
| SK-G    | 17p       | 2                   | 17:15968264;G;A (0.40)<br>17:7246855;G;A (0.50)                                                                                                                                                                                                                        | NCOR1;17-15968264;HPGGTSTPLMDRITYIP<br>ACAP1;17-7246855;RTARAGYRRRALDYA<br>ACAP1;17-7246855;RTARAGYRRRALDYALQ                                                                                                                                                                                                                                                                                                                       |
| CAS-D   | 10p       | 2                   | 10:30318683;C;T (0.67)<br>10:34400116;C;T (0.66)                                                                                                                                                                                                                       | KIAA1462;10-30318683;RSQKPREHKNLEARGMA<br>PARD3;10-34400116;NRLQTEPKERPFYS                                                                                                                                                                                                                                                                                                                                                          |
| CAS-A   | 1p        | 2                   | 1:109796000;T;C (0.35)<br>1:22985978;T;C (0.33)                                                                                                                                                                                                                        | CELSR2;1-109796000;RPLEAIMSALVSDGVHS<br>C1QB;1-22985978;MMKIPWGSTPVLMLLLL<br>C1QB;1-22985978;PMKIPWGSTPVLMLLLL<br>C1QB;1-22985978;SMKIPWGSTPVLMLLLL                                                                                                                                                                                                                                                                                 |
| CAS-E   | 18        | 2                   | 18:12308722;C;T (0.47)<br>18:77470376;C;T (0.44)                                                                                                                                                                                                                       | TUBB6;18-12308722;ISDEHGIDSAGYVGD5<br>CTDP1;18-77470376;LDPEKCLFFHRILSRDE                                                                                                                                                                                                                                                                                                                                                           |
| CAS-E   | 17        | 2                   | 17:48627459;C;T (0.24)<br>17:7578472;G;A (0.37)                                                                                                                                                                                                                        | SPATA20;17-48627459;KMMANGGIWDHVGGQGH<br>SPATA20;17-48627459;KMMANGGIWDHVGGQAS<br>TP53;17-7578472;LWVDSTPPLGTRVRAMA                                                                                                                                                                                                                                                                                                                 |
| CAS-B   | 10        | 2                   | 10:17195512;C;T (0.48)<br>10:50004362;G;A (0.50)                                                                                                                                                                                                                       | TRDMT1;10-17195512;ANLLGFPPKFGFPEKIT<br>TRDMT1;10-17195512;ANLLGFPPKFGMWDTCT<br>WDFY4;10-50004362;YQIMAFLLKKKASLLNH                                                                                                                                                                                                                                                                                                                 |

|       |                       |   |                                                                         |                                                                                                         |
|-------|-----------------------|---|-------------------------------------------------------------------------|---------------------------------------------------------------------------------------------------------|
| CAS-C | 12q21.2-12q24.31      | 2 | 12:90021464;G;A (0.15)<br>12:91498054;G;A (0.50)                        | ATP2B1;12-90021464;KQDGAIECNKAKAQDGLUM;12-91498054;FCKILGPLFYSKIKHLR                                    |
| ETH-J | 14                    | 2 | 14:103371750;T;C (0.50)<br>14:23746261;G;A (0.50)                       | TRAF3;14-103371750;LSLYSQPHTGYFGYKMHOMEZ;14-23746261;LQLVWTQAVQTSELDN                                   |
| SK-G  | 1p36                  | 2 | 1;11252401;G;A (0.43)<br>1;16577607;G;A (0.47)                          | ANGPTL7;1-11252401;GVYKLPDNLGSPLEFBXO42;1-16577607;IKAMSSKGLSASAALSP                                    |
| SK-H  | 6q                    | 1 | 6;158296120;G;A (0.01)                                                  | SNX9;6-158296120;DGKDDQFSCENSADQAF                                                                      |
| SK-H  | 8                     | 3 | 8;145770957;C;T (0.25)<br>8;37698295;G;A(0.02)<br>8;22548509;C;T(0.004) | ARHGAP39;8-145770957;ESIKKPMIMTSDRHVKKGPR124;8-37698295;MLRFYLAEGLIICGEGR3;8-22548509;IPEHKPFQDMDPIRVNP |
| SK-H  | 15q21.3-15q26         | 1 | 15;90969454;G;A (0.03)                                                  | IQGAP1;15-90969454;GNFFSPKVMSLKKIYDR                                                                    |
| SK-H  | 17                    | 1 | 17;56585561;G;A (0.50)                                                  | MTMR4;17-56585561;DKELENAFFRSWKRIP                                                                      |
| CAS-D | 2                     | 1 | 2;98421844;G;A (0.47)                                                   | TMEM131;2-98421844;CYVGLPLFLKSEPKVQP                                                                    |
| CAS-D | 4q                    | 1 | 4;148546070;G;A (0.50)                                                  | TMEM184C;4-148546070;FLTNYLTNQYPNLVLIL                                                                  |
| CAS-D | 4p                    | 1 | 4;42466932;G;A (0.44)                                                   | ATP8A1;4-42466932;NEGLQAANFSDYSIAQF                                                                     |
| CAS-D | 6q                    | 1 | 6;152557362;G;A (0.50)                                                  | SYNE1;6-152557362;DDGKRLILIFISCSDLES                                                                    |
| CAS-D | 16q23-16q24           | 1 | 16;88503957;G;A (0.50)                                                  | ZNF469;16-88503957;LQRHLAVHNPQRVYLCP                                                                    |
| CAS-F | 4:190330186-191044268 | 1 | 4:190882998;A;G (0.19)                                                  | FRG1;4-190882998;TERNFRASRTTNLK                                                                         |
| CAS-F | 6p21.32               | 1 | 6;32552015;C;G(0.18)                                                    | HLA-DRB1;6-32552015;VGEFRAVTQLGRPDAEY                                                                   |
| CAS-E | 11p                   | 1 | 11;1905806;A;C(0.42)                                                    | LSP1;11-1905806;WLEQYTALETAGRTPK                                                                        |
| CAS-E | 16p                   | 1 | 16;1614071;G;A(0.31)                                                    | IFT140;16-1614071;EPRLFVCEVVQETPRSQ                                                                     |
| CAS-B | 15                    | 1 | 15;33359865;G;T(0.05)                                                   | FMN1;15-33359865;NPTSQQDDYSNGLDPQE                                                                      |
| CAS-B | 7p21                  | 1 | 7;16460821;G;A (0.12)                                                   | ISPD;7-16460821;VAGTEPGRYPQAVAAVL                                                                       |
| CAS-C | 14q32.31-14q32.33     | 1 | 14;103372102;C;T(0.15)                                                  | TRAF3;14-103372102;FIKIVVDLTLDPDP                                                                       |
| CAS-C | 1p36.33-1p36.32       | 1 | 1;1374916;G;A(0.15)                                                     | VWA1;1-1374916;ALGSAALSYHVQFGPL                                                                         |
| CAS-C | 1p31.3-1p31.2         | 1 | 1;64095682;G;A (0.23)                                                   | PGM1;1-64095682;KTIEEYAVYPDLKVDLG                                                                       |
| CAS-C | 20p                   | 1 | 20;9368184;G;A (0.18)                                                   | PLCB4;20-9368184;IITHGKAMYTDILFKDV                                                                      |
| ETH-J | 11p                   | 1 | 11;46921021;C;A (0.29)                                                  | LRP4;11-46921021;KCSDKEFRFSDGSCIAE                                                                      |
| ETH-J | 17q21.31-17q25.3      | 1 | 17;66920899;G;A (0.50)                                                  | ABCA8;17-66920899;EDEMADPLFHDSFEQA                                                                      |

**Supplementary Table 9. Number of regions in each patient with more/fewer non-synonymous mutations than expected based on the synonymous rate and codon usage bias and high/low neo-antigenic load (based on the median rate across the genome). One-sided tests of independence (mutual exclusivity) were performed using Barnard's test as implemented in the R package Exact.**

| <b>Patient</b> | <b>NS:S above expected rate</b>      |                                      | <b>NS:S below expected rate</b>      |                                      | <b>Total per patient</b> | <b>P-value</b> |
|----------------|--------------------------------------|--------------------------------------|--------------------------------------|--------------------------------------|--------------------------|----------------|
|                | <b>Neo-antigens below background</b> | <b>Neo-antigens above background</b> | <b>Neo-antigens below background</b> | <b>Neo-antigens above background</b> |                          |                |
| <b>CAS-A</b>   | 2                                    | 0                                    | 2                                    | 2                                    | 6                        | 1              |
| <b>CAS-B</b>   | 7                                    | 0                                    | 0                                    | 6                                    | 13                       | 1              |
| <b>CAS-C</b>   | 1                                    | 1                                    | 1                                    | 2                                    | 5                        | 0.7            |
| <b>CAS-D</b>   | 9                                    | 22                                   | 13                                   | 9                                    | 53                       | 0.02           |
| <b>CAS-E</b>   | 11                                   | 4                                    | 1                                    | 3                                    | 19                       | 0.9            |
| <b>CAS-F</b>   | 0                                    | 1                                    | 0                                    | 1                                    | 2                        | NA             |
| <b>CAS-G</b>   | 0                                    | 0                                    | 6                                    | 0                                    | 6                        | NA             |
| <b>ETH-E</b>   | 0                                    | 2                                    | 4                                    | 7                                    | 13                       | 0.2            |
| <b>ETH-F</b>   | 0                                    | 0                                    | 1                                    | 0                                    | 1                        | NA             |
| <b>ETH-J</b>   | 0                                    | 0                                    | 0                                    | 2                                    | 2                        | NA             |
| <b>SK-G</b>    | 1                                    | 1                                    | 3                                    | 1                                    | 6                        | 0.4            |
| <b>SK-H</b>    | 4                                    | 2                                    | 0                                    | 3                                    | 9                        | 1              |
| <b>Total</b>   | 35                                   | 33                                   | 31                                   | 36                                   | 135                      | 0.8            |

**Supplementary Table 10. Mutations in genes that regulate chromosomal integrity.**

| Patient | Sample | Variant          | MAF  | Mutation Type        | Gene   | COSMIC | Polyphen2                | SIFT              | AA Change                      |
|---------|--------|------------------|------|----------------------|--------|--------|--------------------------|-------------------|--------------------------------|
| CAS-G   | DM4    | 1;186291703;G;A  | 0.03 | stop_gained          | TPR    | .      | .                        | .                 | ENSP00000356448.3.p.Arg2105Ter |
| CAS-G   | DM5    | 11;108141866;C;T | 0.17 | missense_variant     | ATM    | .      | benign(0.252)            | deleterious(0.04) | ENSP00000388058.2.p.Pro972Ser  |
| CAS-G   | DM6    | 11;108178681;C;T | 0.13 | missense_variant     | ATM    | .      | benign(0.052)            | tolerated(0.25)   | ENSP00000278616.4.p.Ala1911Val |
| CAS-G   | DM6    | 11;71723981;C;T  | 0.06 | missense_variant     | NUMA1  | .      | probably_damaging(0.992) | tolerated(1)      | ENSP00000446396.1.p.Arg127Lys  |
| CAS-G   | DM6    | 13;103515417;C;T | 0.09 | missense_variant     | ERCC5  | .      | benign(0.063)            | tolerated(0.14)   | ENSP00000347978.4.p.Pro640Ser  |
| CAS-G   | DM3    | 16;23646286;A;C  | 0.51 | missense_variant     | PALB2  | .      | benign(0.005)            | tolerated(0.13)   | ENSP00000261584.4.p.Cys527Trp  |
| CAS-G   | DM4    | 16;23646286;A;C  | 0.66 | missense_variant     | PALB2  | .      | benign(0.005)            | tolerated(0.13)   | ENSP00000261584.4.p.Cys527Trp  |
| CAS-G   | DM1    | 16;23646286;A;C  | 0.67 | missense_variant     | PALB2  | .      | benign(0.005)            | tolerated(0.13)   | ENSP00000261584.4.p.Cys527Trp  |
| CAS-G   | DM2    | 16;23646286;A;C  | 0.52 | missense_variant     | PALB2  | .      | benign(0.005)            | tolerated(0.13)   | ENSP00000261584.4.p.Cys527Trp  |
| CAS-G   | DM5    | 16;23646286;A;C  | 0.50 | missense_variant     | PALB2  | .      | benign(0.005)            | tolerated(0.13)   | ENSP00000261584.4.p.Cys527Trp  |
| CAS-G   | DM6    | 16;23646286;A;C  | 0.51 | missense_variant     | PALB2  | .      | benign(0.005)            | tolerated(0.13)   | ENSP00000261584.4.p.Cys527Trp  |
| CAS-G   | P      | 16;23646286;A;C  | 0.31 | missense_variant     | PALB2  | .      | benign(0.005)            | tolerated(0.13)   | ENSP00000261584.4.p.Cys527Trp  |
| CAS-G   | RM     | 16;23646286;A;C  | 0.42 | missense_variant     | PALB2  | .      | benign(0.005)            | tolerated(0.13)   | ENSP00000261584.4.p.Cys527Trp  |
| CAS-G   | DM6    | 16;89815076;G;A  | 0.05 | missense_variant     | FANCA  | .      | unknown(0)               | .                 | ENSP00000456588.1.p.Leu182Phe  |
| CAS-G   | DM4    | 16;89816195;C;T  | 0.11 | missense_variant     | FANCA  | .      | benign(0.023)            | tolerated(1)      | ENSP00000455974.1.p.Ser1Asn    |
| CAS-G   | DM3    | 16;89877451;C;T  | 0.10 | missense_variant     | FANCA  | .      | benign(0.001)            | deleterious(0.03) | ENSP00000455946.1.p.Ala100Thr  |
| CAS-G   | DM5    | 17;41243719;C;T  | 0.21 | missense_variant     | BRCA1  | .      | benign(0.011)            | tolerated(0.29)   | ENSP00000417241.1.p.Ala42Thr   |
| CAS-G   | DM6    | 17;7579550;G;A   | 0.10 | missense_variant     | TP53   | 45013  | benign(0.266)            | tolerated(0.69)   | ENSP00000398846.2.p.Ser46Phe   |
| CAS-G   | DM4    | 2;48018128;G;A   | 0.06 | missense_variant     | MSH6   | .      | probably_damaging(0.999) | deleterious(0)    | ENSP00000475605.1.p.Cys9Tyr    |
| CAS-G   | DM5    | 2;48027175;G;A   | 0.24 | missense_variant     | MSH6   | .      | probably_damaging(1)     | deleterious(0)    | ENSP00000446475.1.p.Gly555Ser  |
| CAS-G   | DM6    | 2;48027431;G;A   | 0.20 | missense_variant     | MSH6   | .      | probably_damaging(1)     | deleterious(0)    | ENSP00000446475.1.p.Gly640Asp  |
| CAS-G   | DM3    | 2;48033352;C;T   | 0.15 | missense_variant     | MSH6   | 13892  | probably_damaging(0.999) | deleterious(0)    | ENSP00000446475.1.p.Thr1089Ile |
| CAS-G   | DM4    | 2;48033352;C;T   | 0.13 | missense_variant     | MSH6   | 13892  | probably_damaging(0.999) | deleterious(0)    | ENSP00000446475.1.p.Thr1089Ile |
| CAS-G   | DM1    | 2;48033352;C;T   | 0.12 | missense_variant     | MSH6   | 13892  | probably_damaging(0.999) | deleterious(0)    | ENSP00000446475.1.p.Thr1089Ile |
| CAS-G   | DM6    | 2;48033352;C;T   | 0.27 | missense_variant     | MSH6   | 13892  | probably_damaging(0.999) | deleterious(0)    | ENSP00000446475.1.p.Thr1089Ile |
| CAS-G   | DM5    | 2;48033791;G;A   | 0.13 | splice_donor_variant | MSH6   | .      | .                        | .                 | .                              |
| CAS-G   | DM6    | 22;41513691;G;A  | 0.18 | missense_variant     | EP300  | .      | unknown(0)               | tolerated(0.07)   | ENSP00000263253.7.p.Gly199Ser  |
| CAS-G   | DM5    | 3;37050383;G;A   | 0.05 | missense_variant     | MLH1   | .      | possibly_damaging(0.792) | deleterious(0.01) | ENSP00000402564.1.p.Glu80Lys   |
| CAS-G   | DM4    | 3;37089083;G;A   | 0.06 | missense_variant     | MLH1   | .      | probably_damaging(0.998) | deleterious(0)    | ENSP00000443665.1.p.Gly361Asp  |
| CAS-G   | DM4    | 3;41266493;C;T   | 0.08 | missense_variant     | CTNNB1 | .      | benign(0.126)            | tolerated(0.08)   | ENSP00000401599.1.p.Ala97Val   |
| CAS-G   | DM4    | 9;110250310;G;A  | 0.05 | missense_variant     | KLF4   | .      | possibly_damaging(0.763) | tolerated(0.3)    | ENSP00000363804.4.p.Ala122Val  |
| CAS-G   | DM3    | 9;110250325;G;A  | 0.04 | missense_variant     | KLF4   | .      | benign(0.036)            | tolerated(0.09)   | ENSP00000363804.4.p.Pro117Leu  |
| CAS-D   | DM1    | 17;57760301;C;T  | 1.00 | missense_variant     | CLTC   | .      | unknown(0)               | deleterious(0.01) | ENSP00000462252.1.p.Arg204Cys  |
| CAS-D   | P1     | 17;57760301;C;T  | 1.00 | missense_variant     | CLTC   | .      | unknown(0)               | deleterious(0.01) | ENSP00000462252.1.p.Arg204Cys  |
| CAS-D   | P2     | 17;57760301;C;T  | 0.87 | missense_variant     | CLTC   | .      | unknown(0)               | deleterious(0.01) | ENSP00000462252.1.p.Arg204Cys  |
| CAS-D   | P3     | 17;57760301;C;T  | 0.97 | missense_variant     | CLTC   | .      | unknown(0)               | deleterious(0.01) | ENSP00000462252.1.p.Arg204Cys  |

|       |     |                  |      |                    |         |                   |                      |                   |                                      |
|-------|-----|------------------|------|--------------------|---------|-------------------|----------------------|-------------------|--------------------------------------|
| CAS-D | DM2 | 17;57760301;C;T  | 1.00 | missense_variant   | CLTC    | .                 | unknown(0)           | deleterious(0.01) | ENSP00000462252.1.p.Arg204Cys        |
| CAS-D | DM3 | 17;57760301;C;T  | 1.00 | missense_variant   | CLTC    | .                 | unknown(0)           | deleterious(0.01) | ENSP00000462252.1.p.Arg204Cys        |
| CAS-D | DM4 | 17;57760301;C;T  | 0.94 | missense_variant   | CLTC    | .                 | unknown(0)           | deleterious(0.01) | ENSP00000462252.1.p.Arg204Cys        |
| CAS-D | DM5 | 17;57760301;C;T  | 1.00 | missense_variant   | CLTC    | .                 | unknown(0)           | deleterious(0.01) | ENSP00000462252.1.p.Arg204Cys        |
| CAS-D | DM6 | 17;57760301;C;T  | 1.00 | missense_variant   | CLTC    | .                 | unknown(0)           | deleterious(0.01) | ENSP00000462252.1.p.Arg204Cys        |
| CAS-D | RM  | 17;57760301;C;T  | 0.98 | missense_variant   | CLTC    | .                 | unknown(0)           | deleterious(0.01) | ENSP00000462252.1.p.Arg204Cys        |
|       |     |                  |      |                    |         | 106,561,200,071,2 |                      |                   |                                      |
|       |     |                  |      |                    |         | 00,000,000,000,00 |                      |                   |                                      |
| CAS-D | DM1 | 17;7577539;G;A   | 1.00 | missense_variant   | TP53    | 0,000             | probably_damaging(1) | deleterious(0)    | ENSP00000398846.2.p.Arg248Trp        |
|       |     |                  |      |                    |         | 106,561,200,071,2 |                      |                   |                                      |
|       |     |                  |      |                    |         | 00,000,000,000,00 |                      |                   |                                      |
| CAS-D | P1  | 17;7577539;G;A   | 0.64 | missense_variant   | TP53    | 0,000             | probably_damaging(1) | deleterious(0)    | ENSP00000398846.2.p.Arg248Trp        |
|       |     |                  |      |                    |         | 106,561,200,071,2 |                      |                   |                                      |
|       |     |                  |      |                    |         | 00,000,000,000,00 |                      |                   |                                      |
| CAS-D | P2  | 17;7577539;G;A   | 1.00 | missense_variant   | TP53    | 0,000             | probably_damaging(1) | deleterious(0)    | ENSP00000398846.2.p.Arg248Trp        |
|       |     |                  |      |                    |         | 106,561,200,071,2 |                      |                   |                                      |
|       |     |                  |      |                    |         | 00,000,000,000,00 |                      |                   |                                      |
| CAS-D | P3  | 17;7577539;G;A   | 0.54 | missense_variant   | TP53    | 0,000             | probably_damaging(1) | deleterious(0)    | ENSP00000398846.2.p.Arg248Trp        |
|       |     |                  |      |                    |         | 106,561,200,071,2 |                      |                   |                                      |
|       |     |                  |      |                    |         | 00,000,000,000,00 |                      |                   |                                      |
| CAS-D | DM2 | 17;7577539;G;A   | 0.54 | missense_variant   | TP53    | 0,000             | probably_damaging(1) | deleterious(0)    | ENSP00000398846.2.p.Arg248Trp        |
|       |     |                  |      |                    |         | 106,561,200,071,2 |                      |                   |                                      |
|       |     |                  |      |                    |         | 00,000,000,000,00 |                      |                   |                                      |
| CAS-D | DM3 | 17;7577539;G;A   | 0.89 | missense_variant   | TP53    | 0,000             | probably_damaging(1) | deleterious(0)    | ENSP00000398846.2.p.Arg248Trp        |
|       |     |                  |      |                    |         | 106,561,200,071,2 |                      |                   |                                      |
|       |     |                  |      |                    |         | 00,000,000,000,00 |                      |                   |                                      |
| CAS-D | DM4 | 17;7577539;G;A   | 0.91 | missense_variant   | TP53    | 0,000             | probably_damaging(1) | deleterious(0)    | ENSP00000398846.2.p.Arg248Trp        |
|       |     |                  |      |                    |         | 106,561,200,071,2 |                      |                   |                                      |
|       |     |                  |      |                    |         | 00,000,000,000,00 |                      |                   |                                      |
| CAS-D | DM5 | 17;7577539;G;A   | 1.00 | missense_variant   | TP53    | 0,000             | probably_damaging(1) | deleterious(0)    | ENSP00000398846.2.p.Arg248Trp        |
|       |     |                  |      |                    |         | 106,561,200,071,2 |                      |                   |                                      |
|       |     |                  |      |                    |         | 00,000,000,000,00 |                      |                   |                                      |
| CAS-D | DM6 | 17;7577539;G;A   | 0.79 | missense_variant   | TP53    | 0,000             | probably_damaging(1) | deleterious(0)    | ENSP00000398846.2.p.Arg248Trp        |
|       |     |                  |      |                    |         | 106,561,200,071,2 |                      |                   |                                      |
|       |     |                  |      |                    |         | 00,000,000,000,00 |                      |                   |                                      |
| CAS-D | RM  | 17;7577539;G;A   | 0.91 | missense_variant   | TP53    | 0,000             | probably_damaging(1) | deleterious(0)    | ENSP00000398846.2.p.Arg248Trp        |
| CAS-D | DM1 | 6;167417807;C;CA | 0.32 | frameshift_variant | FGFR1OP | .                 | .                    | .                 | ENSP00000355812.3.p.Glu120ArgfsTer31 |
| CAS-D | P1  | 6;167417807;C;CA | 0.33 | frameshift_variant | FGFR1OP | .                 | .                    | .                 | ENSP00000355812.3.p.Glu120ArgfsTer31 |
| CAS-D | P2  | 6;167417807;C;CA | 0.44 | frameshift_variant | FGFR1OP | .                 | .                    | .                 | ENSP00000355812.3.p.Glu120ArgfsTer31 |
| CAS-D | P3  | 6;167417807;C;CA | 0.31 | frameshift_variant | FGFR1OP | .                 | .                    | .                 | ENSP00000355812.3.p.Glu120ArgfsTer31 |
| CAS-D | DM2 | 6;167417807;C;CA | 0.47 | frameshift_variant | FGFR1OP | .                 | .                    | .                 | ENSP00000355812.3.p.Glu120ArgfsTer31 |
| CAS-D | DM3 | 6;167417807;C;CA | 0.48 | frameshift_variant | FGFR1OP | .                 | .                    | .                 | ENSP00000355812.3.p.Glu120ArgfsTer31 |
| CAS-D | DM4 | 6;167417807;C;CA | 1.00 | frameshift_variant | FGFR1OP | .                 | .                    | .                 | ENSP00000355812.3.p.Glu120ArgfsTer31 |

|       |     |                  |      |                    |         |                   |                          |                   |                                      |
|-------|-----|------------------|------|--------------------|---------|-------------------|--------------------------|-------------------|--------------------------------------|
| CAS-D | DM5 | 6;167417807;C;CA | 0.47 | frameshift_variant | FGFR1OP | .                 | .                        | .                 | ENSP00000355812.3.p.Glu120ArgfsTer31 |
| CAS-D | DM6 | 6;167417807;C;CA | 0.40 | frameshift_variant | FGFR1OP | .                 | .                        | .                 | ENSP00000355812.3.p.Glu120ArgfsTer31 |
| CAS-D | RM  | 6;167417807;C;CA | 0.63 | frameshift_variant | FGFR1OP | .                 | .                        | .                 | ENSP00000355812.3.p.Glu120ArgfsTer31 |
| CAS-F | RM2 | 11;3765753;G;A   | 0.96 | missense_variant   | NUP98   | .                 | possibly_damaging(0.623) | tolerated(0.19)   | ENSP00000352091.4.p.Pro465Leu        |
| CAS-F | RM3 | 11;3765753;G;A   | 1.00 | missense_variant   | NUP98   | .                 | possibly_damaging(0.623) | tolerated(0.19)   | ENSP00000352091.4.p.Pro465Leu        |
| CAS-F | RM1 | 11;3765753;G;A   | 0.57 | missense_variant   | NUP98   | .                 | possibly_damaging(0.623) | tolerated(0.19)   | ENSP00000352091.4.p.Pro465Leu        |
| CAS-F | DM2 | 11;3765753;G;A   | 0.96 | missense_variant   | NUP98   | .                 | possibly_damaging(0.623) | tolerated(0.19)   | ENSP00000352091.4.p.Pro465Leu        |
| CAS-F | DM3 | 11;3765753;G;A   | 1.00 | missense_variant   | NUP98   | .                 | possibly_damaging(0.623) | tolerated(0.19)   | ENSP00000352091.4.p.Pro465Leu        |
| CAS-F | DM1 | 11;3765753;G;A   | 0.82 | missense_variant   | NUP98   | .                 | possibly_damaging(0.623) | tolerated(0.19)   | ENSP00000352091.4.p.Pro465Leu        |
| CAS-F | RM2 | 15;91292754;G;A  | 0.14 | missense_variant   | BLM     | .                 | benign(0)                | tolerated(1)      | ENSP00000347232.3.p.Val86Ile         |
| CAS-F | RM3 | 15;91292754;G;A  | 0.12 | missense_variant   | BLM     | .                 | benign(0)                | tolerated(1)      | ENSP00000347232.3.p.Val86Ile         |
| CAS-F | RM1 | 15;91292754;G;A  | 0.14 | missense_variant   | BLM     | .                 | benign(0)                | tolerated(1)      | ENSP00000347232.3.p.Val86Ile         |
| CAS-F | DM2 | 15;91292754;G;A  | 0.18 | missense_variant   | BLM     | .                 | benign(0)                | tolerated(1)      | ENSP00000347232.3.p.Val86Ile         |
| CAS-F | DM1 | 15;91292754;G;A  | 0.25 | missense_variant   | BLM     | .                 | benign(0)                | tolerated(1)      | ENSP00000347232.3.p.Val86Ile         |
| CAS-F | RM2 | 8;30974004;G;A   | 0.50 | missense_variant   | WRN     | .                 | probably_damaging(0.999) | deleterious(0)    | ENSP00000298139.5.p.Arg803Lys        |
| CAS-F | RM3 | 8;30974004;G;A   | 0.43 | missense_variant   | WRN     | .                 | probably_damaging(0.999) | deleterious(0)    | ENSP00000298139.5.p.Arg803Lys        |
| CAS-F | RM1 | 8;30974004;G;A   | 0.14 | missense_variant   | WRN     | .                 | probably_damaging(0.999) | deleterious(0)    | ENSP00000298139.5.p.Arg803Lys        |
| CAS-F | DM3 | 8;30974004;G;A   | 0.50 | missense_variant   | WRN     | .                 | probably_damaging(0.999) | deleterious(0)    | ENSP00000298139.5.p.Arg803Lys        |
| CAS-F | DM1 | 8;30974004;G;A   | 0.29 | missense_variant   | WRN     | .                 | probably_damaging(0.999) | deleterious(0)    | ENSP00000298139.5.p.Arg803Lys        |
|       |     |                  |      |                    |         | 75,374,375,374,21 |                          |                   |                                      |
| CAS-F | RM2 | 9;21971017;G;A   | 1.00 | missense_variant   | CDKN2A  | 2,400             | probably_damaging(1)     | deleterious(0)    | ENSP00000307101.5.p.Pro114Leu        |
|       |     |                  |      |                    |         | 75,374,375,374,21 |                          |                   |                                      |
| CAS-F | RM3 | 9;21971017;G;A   | 1.00 | missense_variant   | CDKN2A  | 2,400             | probably_damaging(1)     | deleterious(0)    | ENSP00000307101.5.p.Pro114Leu        |
|       |     |                  |      |                    |         | 75,374,375,374,21 |                          |                   |                                      |
| CAS-F | RM1 | 9;21971017;G;A   | 1.00 | missense_variant   | CDKN2A  | 2,400             | probably_damaging(1)     | deleterious(0)    | ENSP00000307101.5.p.Pro114Leu        |
|       |     |                  |      |                    |         | 75,374,375,374,21 |                          |                   |                                      |
| CAS-F | DM2 | 9;21971017;G;A   | 1.00 | missense_variant   | CDKN2A  | 2,400             | probably_damaging(1)     | deleterious(0)    | ENSP00000307101.5.p.Pro114Leu        |
|       |     |                  |      |                    |         | 75,374,375,374,21 |                          |                   |                                      |
| CAS-F | DM3 | 9;21971017;G;A   | 0.90 | missense_variant   | CDKN2A  | 2,400             | probably_damaging(1)     | deleterious(0)    | ENSP00000307101.5.p.Pro114Leu        |
|       |     |                  |      |                    |         | 75,374,375,374,21 |                          |                   |                                      |
| CAS-F | DM1 | 9;21971017;G;A   | 1.00 | missense_variant   | CDKN2A  | 2,400             | probably_damaging(1)     | deleterious(0)    | ENSP00000307101.5.p.Pro114Leu        |
| CAS-E | DM1 | 16;23641109;A;G  | 0.66 | missense_variant   | PALB2   | .                 | benign(0.126)            | deleterious(0.01) | ENSP00000261584.4.p.Leu789Pro        |
| CAS-E | RM  | 16;23641109;A;G  | 0.50 | missense_variant   | PALB2   | .                 | benign(0.126)            | deleterious(0.01) | ENSP00000261584.4.p.Leu789Pro        |
| CAS-E | DM2 | 16;23641109;A;G  | 0.98 | missense_variant   | PALB2   | .                 | benign(0.126)            | deleterious(0.01) | ENSP00000261584.4.p.Leu789Pro        |
| CAS-E | DM3 | 16;23641109;A;G  | 0.67 | missense_variant   | PALB2   | .                 | benign(0.126)            | deleterious(0.01) | ENSP00000261584.4.p.Leu789Pro        |
| CAS-E | DM4 | 16;23641109;A;G  | 0.50 | missense_variant   | PALB2   | .                 | benign(0.126)            | deleterious(0.01) | ENSP00000261584.4.p.Leu789Pro        |
| CAS-E | DM5 | 16;23641109;A;G  | 0.50 | missense_variant   | PALB2   | .                 | benign(0.126)            | deleterious(0.01) | ENSP00000261584.4.p.Leu789Pro        |
| CAS-E | P   | 16;23641109;A;G  | 0.50 | missense_variant   | PALB2   | .                 | benign(0.126)            | deleterious(0.01) | ENSP00000261584.4.p.Leu789Pro        |
| CAS-E | DM1 | 17;7578472;G;A   | 0.28 | missense_variant   | TP53    | 44367             | benign(0.014)            | tolerated(0.21)   | ENSP00000398846.2.p.Pro153Leu        |
| CAS-E | RM  | 17;7578472;G;A   | 0.39 | missense_variant   | TP53    | 44367             | benign(0.014)            | tolerated(0.21)   | ENSP00000398846.2.p.Pro153Leu        |
| CAS-E | DM2 | 17;7578472;G;A   | 0.40 | missense_variant   | TP53    | 44367             | benign(0.014)            | tolerated(0.21)   | ENSP00000398846.2.p.Pro153Leu        |
| CAS-E | DM3 | 17;7578472;G;A   | 0.31 | missense_variant   | TP53    | 44367             | benign(0.014)            | tolerated(0.21)   | ENSP00000398846.2.p.Pro153Leu        |
| CAS-E | DM5 | 17;7578472;G;A   | 0.31 | missense_variant   | TP53    | 44367             | benign(0.014)            | tolerated(0.21)   | ENSP00000398846.2.p.Pro153Leu        |

|       |     |                                      |      |                  |        |               |                          |                   |                                    |
|-------|-----|--------------------------------------|------|------------------|--------|---------------|--------------------------|-------------------|------------------------------------|
| CAS-E | P   | 17;7578472;G;A<br>9;21974714;GGCAGCG | 0.35 | missense_variant | TP53   | 44367         | benign(0.014)            | tolerated(0.21)   | ENSP00000398846.2.p.Pro153Leu      |
| CAS-E | DM1 | CCCCGCCTCCA;G<br>9;21974714;GGCAGCG  | 0.64 | inframe_deletion | CDKN2A | 24418         | .                        | .                 | ENSP00000464202.1.p.Leu32_Leu37del |
| CAS-E | RM  | CCCCGCCTCCA;G<br>9;21974714;GGCAGCG  | 0.69 | inframe_deletion | CDKN2A | 24418         | .                        | .                 | ENSP00000464202.1.p.Leu32_Leu37del |
| CAS-E | DM2 | CCCCGCCTCCA;G<br>9;21974714;GGCAGCG  | 0.62 | inframe_deletion | CDKN2A | 24418         | .                        | .                 | ENSP00000464202.1.p.Leu32_Leu37del |
| CAS-E | DM3 | CCCCGCCTCCA;G<br>9;21974714;GGCAGCG  | 0.55 | inframe_deletion | CDKN2A | 24418         | .                        | .                 | ENSP00000464202.1.p.Leu32_Leu37del |
| CAS-E | DM4 | CCCCGCCTCCA;G<br>9;21974714;GGCAGCG  | 0.66 | inframe_deletion | CDKN2A | 24418         | .                        | .                 | ENSP00000464202.1.p.Leu32_Leu37del |
| CAS-E | DM5 | CCCCGCCTCCA;G<br>9;21974714;GGCAGCG  | 0.57 | inframe_deletion | CDKN2A | 24418         | .                        | .                 | ENSP00000464202.1.p.Leu32_Leu37del |
| CAS-E | P   | CCCCGCCTCCA;G                        | 0.66 | inframe_deletion | CDKN2A | 24418         | .                        | .                 | ENSP00000464202.1.p.Leu32_Leu37del |
| CAS-A | DM3 | 12;133220089;G;C                     | 0.26 | missense_variant | POLE   | .             | benign(0.002)            | tolerated(1)      | ENSP00000445753.1.p.Gln1423Glu     |
| CAS-A | DM1 | 12;133220089;G;C                     | 0.16 | missense_variant | POLE   | .             | benign(0.002)            | tolerated(1)      | ENSP00000445753.1.p.Gln1423Glu     |
| CAS-A | DM2 | 12;133220089;G;C                     | 0.23 | missense_variant | POLE   | .             | benign(0.002)            | tolerated(1)      | ENSP00000445753.1.p.Gln1423Glu     |
| CAS-A | DM4 | 12;133220089;G;C                     | 0.21 | missense_variant | POLE   | .             | benign(0.002)            | tolerated(1)      | ENSP00000445753.1.p.Gln1423Glu     |
| CAS-A | DM3 | 5;112173567;C;T                      | 0.75 | missense_variant | APC    | .             | probably_damaging(0.999) | deleterious(0)    | ENSP00000423828.2.p.Ala759Val      |
| CAS-A | DM1 | 5;112173567;C;T                      | 0.55 | missense_variant | APC    | .             | probably_damaging(0.999) | deleterious(0)    | ENSP00000423828.2.p.Ala759Val      |
| CAS-A | RM2 | 5;112173567;C;T                      | 0.34 | missense_variant | APC    | .             | probably_damaging(0.999) | deleterious(0)    | ENSP00000423828.2.p.Ala759Val      |
| CAS-A | RM1 | 5;112173567;C;T                      | 0.40 | missense_variant | APC    | .             | probably_damaging(0.999) | deleterious(0)    | ENSP00000423828.2.p.Ala759Val      |
| CAS-A | RM3 | 5;112173567;C;T                      | 0.47 | missense_variant | APC    | .             | probably_damaging(0.999) | deleterious(0)    | ENSP00000423828.2.p.Ala759Val      |
| CAS-A | DM2 | 5;112173567;C;T                      | 0.50 | missense_variant | APC    | .             | probably_damaging(0.999) | deleterious(0)    | ENSP00000423828.2.p.Ala759Val      |
| CAS-A | DM4 | 5;112173567;C;T                      | 0.45 | missense_variant | APC    | .             | probably_damaging(0.999) | deleterious(0)    | ENSP00000423828.2.p.Ala759Val      |
| CAS-A | DM3 | 8;30982117;C;T                       | 0.65 | missense_variant | WRN    | .             | benign(0.003)            | tolerated(0.17)   | ENSP00000298139.5.p.His904Tyr      |
| CAS-A | DM1 | 8;30982117;C;T                       | 0.50 | missense_variant | WRN    | .             | benign(0.003)            | tolerated(0.17)   | ENSP00000298139.5.p.His904Tyr      |
| CAS-A | RM2 | 8;30982117;C;T                       | 0.49 | missense_variant | WRN    | .             | benign(0.003)            | tolerated(0.17)   | ENSP00000298139.5.p.His904Tyr      |
| CAS-A | RM1 | 8;30982117;C;T                       | 0.44 | missense_variant | WRN    | .             | benign(0.003)            | tolerated(0.17)   | ENSP00000298139.5.p.His904Tyr      |
| CAS-A | RM3 | 8;30982117;C;T                       | 0.36 | missense_variant | WRN    | .             | benign(0.003)            | tolerated(0.17)   | ENSP00000298139.5.p.His904Tyr      |
| CAS-A | DM2 | 8;30982117;C;T                       | 0.50 | missense_variant | WRN    | .             | benign(0.003)            | tolerated(0.17)   | ENSP00000298139.5.p.His904Tyr      |
| CAS-A | DM4 | 8;30982117;C;T                       | 0.50 | missense_variant | WRN    | .             | benign(0.003)            | tolerated(0.17)   | ENSP00000298139.5.p.His904Tyr      |
| CAS-B | RM1 | 17;7574003;G;A                       | 0.90 | stop_gained      | TP53   | 1,107,399,721 | .                        | .                 | ENSP00000391478.2.p.Arg342Ter      |
| CAS-B | RM2 | 17;7574003;G;A                       | 0.71 | stop_gained      | TP53   | 1,107,399,721 | .                        | .                 | ENSP00000391478.2.p.Arg342Ter      |
| CAS-B | RM3 | 17;7574003;G;A                       | 0.84 | stop_gained      | TP53   | 1,107,399,721 | .                        | .                 | ENSP00000391478.2.p.Arg342Ter      |
| CAS-B | DM2 | 17;7574003;G;A                       | 1.00 | stop_gained      | TP53   | 1,107,399,721 | .                        | .                 | ENSP00000391478.2.p.Arg342Ter      |
| CAS-B | DM3 | 17;7574003;G;A                       | 1.00 | stop_gained      | TP53   | 1,107,399,721 | .                        | .                 | ENSP00000391478.2.p.Arg342Ter      |
| CAS-B | DM1 | 17;7574003;G;A                       | 0.99 | stop_gained      | TP53   | 1,107,399,721 | .                        | .                 | ENSP00000391478.2.p.Arg342Ter      |
| CAS-B | DM4 | 17;7574003;G;A                       | 0.65 | stop_gained      | TP53   | 1,107,399,721 | .                        | .                 | ENSP00000391478.2.p.Arg342Ter      |
| CAS-B | DM5 | 17;7574003;G;A                       | 0.89 | stop_gained      | TP53   | 1,107,399,721 | .                        | .                 | ENSP00000391478.2.p.Arg342Ter      |
| CAS-B | P   | 17;7574003;G;A                       | 1.00 | stop_gained      | TP53   | 1,107,399,721 | .                        | .                 | ENSP00000391478.2.p.Arg342Ter      |
| CAS-C | DM3 | 1;186307212;G;A                      | 0.14 | missense_variant | TPR    | .             | .                        | deleterious(0.01) | ENSP00000356448.3.p.Arg1439Cys     |



|       |     |                 |      |                    |        |        |                          |                   |                                      |
|-------|-----|-----------------|------|--------------------|--------|--------|--------------------------|-------------------|--------------------------------------|
| CAS-C | DM1 | 2;109380084;C;T | 0.50 | missense_variant   | RANBP2 | .      | benign(0.002)            | tolerated(0.07)   | ENSP00000283195.6.p.Pro1030Leu       |
| CAS-C | DM3 | 2;109380084;C;T | 0.49 | missense_variant   | RANBP2 | .      | benign(0.002)            | tolerated(0.07)   | ENSP00000283195.6.p.Pro1030Leu       |
| CAS-C | DM5 | 2;109380084;C;T | 0.50 | missense_variant   | RANBP2 | .      | benign(0.002)            | tolerated(0.07)   | ENSP00000283195.6.p.Pro1030Leu       |
| CAS-C | DM2 | 2;109380084;C;T | 0.50 | missense_variant   | RANBP2 | .      | benign(0.002)            | tolerated(0.07)   | ENSP00000283195.6.p.Pro1030Leu       |
| CAS-C | DM4 | 2;109380084;C;T | 0.49 | missense_variant   | RANBP2 | .      | benign(0.002)            | tolerated(0.07)   | ENSP00000283195.6.p.Pro1030Leu       |
| CAS-C | DM6 | 2;109380084;C;T | 0.38 | missense_variant   | RANBP2 | .      | benign(0.002)            | tolerated(0.07)   | ENSP00000283195.6.p.Pro1030Leu       |
| CAS-C | P   | 2;109380084;C;T | 0.48 | missense_variant   | RANBP2 | .      | benign(0.002)            | tolerated(0.07)   | ENSP00000283195.6.p.Pro1030Leu       |
| CAS-C | DM5 | 3;41266133;C;G  | 0.45 | missense_variant   | CTNNB1 | 17661  | possibly_damaging(0.792) | deleterious(0.02) | ENSP00000401599.1.p.Pro44Ala         |
| CAS-C | DM4 | 3;41266133;C;G  | 0.47 | missense_variant   | CTNNB1 | 17661  | possibly_damaging(0.792) | deleterious(0.02) | ENSP00000401599.1.p.Pro44Ala         |
| CAS-C | DM6 | 3;41266133;C;G  | 0.49 | missense_variant   | CTNNB1 | 17661  | possibly_damaging(0.792) | deleterious(0.02) | ENSP00000401599.1.p.Pro44Ala         |
| CAS-C | DM5 | 3;41266136;T;C  | 0.46 | missense_variant   | CTNNB1 | 5663   | probably_damaging(0.939) | deleterious(0)    | ENSP00000401599.1.p.Ser45Pro         |
| CAS-C | DM4 | 3;41266136;T;C  | 0.49 | missense_variant   | CTNNB1 | 5663   | probably_damaging(0.939) | deleterious(0)    | ENSP00000401599.1.p.Ser45Pro         |
| CAS-C | DM6 | 3;41266136;T;C  | 0.50 | missense_variant   | CTNNB1 | 5663   | probably_damaging(0.939) | deleterious(0)    | ENSP00000401599.1.p.Ser45Pro         |
| CAS-C | DM1 | 8;30998973;C;T  | 0.48 | missense_variant   | WRN    | 136658 | probably_damaging(0.999) | deleterious(0)    | ENSP00000298139.5.p.Arg999Cys        |
| CAS-C | DM3 | 8;30998973;C;T  | 0.42 | missense_variant   | WRN    | 136658 | probably_damaging(0.999) | deleterious(0)    | ENSP00000298139.5.p.Arg999Cys        |
| CAS-C | DM5 | 8;30998973;C;T  | 0.50 | missense_variant   | WRN    | 136658 | probably_damaging(0.999) | deleterious(0)    | ENSP00000298139.5.p.Arg999Cys        |
| CAS-C | DM2 | 8;30998973;C;T  | 0.50 | missense_variant   | WRN    | 136658 | probably_damaging(0.999) | deleterious(0)    | ENSP00000298139.5.p.Arg999Cys        |
| CAS-C | DM4 | 8;30998973;C;T  | 0.46 | missense_variant   | WRN    | 136658 | probably_damaging(0.999) | deleterious(0)    | ENSP00000298139.5.p.Arg999Cys        |
| CAS-C | DM6 | 8;30998973;C;T  | 0.47 | missense_variant   | WRN    | 136658 | probably_damaging(0.999) | deleterious(0)    | ENSP00000298139.5.p.Arg999Cys        |
| CAS-C | P   | 8;30998973;C;T  | 0.50 | missense_variant   | WRN    | 136658 | probably_damaging(0.999) | deleterious(0)    | ENSP00000298139.5.p.Arg999Cys        |
| CAS-C | DM1 | 9;134073641;C;T | 0.49 | missense_variant   | NUP214 | .      | benign(0.005)            | deleterious(0.03) | ENSP00000396576.2.p.Ser1577Phe       |
| CAS-C | DM3 | 9;134073641;C;T | 0.50 | missense_variant   | NUP214 | .      | benign(0.005)            | deleterious(0.03) | ENSP00000396576.2.p.Ser1577Phe       |
| CAS-C | DM5 | 9;134073641;C;T | 0.43 | missense_variant   | NUP214 | .      | benign(0.005)            | deleterious(0.03) | ENSP00000396576.2.p.Ser1577Phe       |
| CAS-C | DM2 | 9;134073641;C;T | 0.47 | missense_variant   | NUP214 | .      | benign(0.005)            | deleterious(0.03) | ENSP00000396576.2.p.Ser1577Phe       |
| CAS-C | DM4 | 9;134073641;C;T | 0.50 | missense_variant   | NUP214 | .      | benign(0.005)            | deleterious(0.03) | ENSP00000396576.2.p.Ser1577Phe       |
| CAS-C | DM6 | 9;134073641;C;T | 0.50 | missense_variant   | NUP214 | .      | benign(0.005)            | deleterious(0.03) | ENSP00000396576.2.p.Ser1577Phe       |
| CAS-C | P   | 9;134073641;C;T | 0.50 | missense_variant   | NUP214 | .      | benign(0.005)            | deleterious(0.03) | ENSP00000396576.2.p.Ser1577Phe       |
| ETH-E | RM  | 3;14209852;CA;C | 0.87 | frameshift_variant | XPC    | .      | .                        | .                 | ENSP00000423867.1.p.Val141GlyfsTer14 |
| ETH-E | DM1 | 3;14209852;CA;C | 0.91 | frameshift_variant | XPC    | .      | .                        | .                 | ENSP00000423867.1.p.Val141GlyfsTer14 |
| ETH-E | DM2 | 3;14209852;CA;C | 0.84 | frameshift_variant | XPC    | .      | .                        | .                 | ENSP00000423867.1.p.Val141GlyfsTer14 |
| ETH-E | DM3 | 3;14209852;CA;C | 0.91 | frameshift_variant | XPC    | .      | .                        | .                 | ENSP00000423867.1.p.Val141GlyfsTer14 |
| ETH-E | P   | 3;14209852;CA;C | 0.08 | frameshift_variant | XPC    | .      | .                        | .                 | ENSP00000423867.1.p.Val141GlyfsTer14 |
| ETH-F | DM1 | 1;156106037;G;A | 0.43 | missense_variant   | LMNA   | .      | benign(0.416)            | tolerated(0.15)   | ENSP00000357283.4.p.Arg397His        |
| ETH-F | DM2 | 1;156106037;G;A | 0.41 | missense_variant   | LMNA   | .      | benign(0.416)            | tolerated(0.15)   | ENSP00000357283.4.p.Arg397His        |
| ETH-F | DM5 | 1;156106037;G;A | 0.50 | missense_variant   | LMNA   | .      | benign(0.416)            | tolerated(0.15)   | ENSP00000357283.4.p.Arg397His        |
| ETH-F | DM3 | 1;156106037;G;A | 0.36 | missense_variant   | LMNA   | .      | benign(0.416)            | tolerated(0.15)   | ENSP00000357283.4.p.Arg397His        |
| ETH-F | DM4 | 1;156106037;G;A | 0.50 | missense_variant   | LMNA   | .      | benign(0.416)            | tolerated(0.15)   | ENSP00000357283.4.p.Arg397His        |
| ETH-F | P1  | 1;156106037;G;A | 0.67 | missense_variant   | LMNA   | .      | benign(0.416)            | tolerated(0.15)   | ENSP00000357283.4.p.Arg397His        |
| ETH-F | P2  | 1;156106037;G;A | 0.67 | missense_variant   | LMNA   | .      | benign(0.416)            | tolerated(0.15)   | ENSP00000357283.4.p.Arg397His        |
| ETH-F | P3  | 1;156106037;G;A | 0.67 | missense_variant   | LMNA   | .      | benign(0.416)            | tolerated(0.15)   | ENSP00000357283.4.p.Arg397His        |
| MI-F  | DM  | 1;186304261;C;T | 0.29 | missense_variant   | TPR    | .      | .                        | tolerated(0.36)   | ENSP00000356448.3.p.Val1638Ile       |
| MI-F  | RM1 | 1;186304261;C;T | 0.41 | missense_variant   | TPR    | .      | .                        | tolerated(0.36)   | ENSP00000356448.3.p.Val1638Ile       |
| MI-F  | RM2 | 1;186304261;C;T | 0.38 | missense_variant   | TPR    | .      | .                        | tolerated(0.36)   | ENSP00000356448.3.p.Val1638Ile       |

|      |     |                 |      |                         |        |                   |                          |                   |                                |
|------|-----|-----------------|------|-------------------------|--------|-------------------|--------------------------|-------------------|--------------------------------|
| MI-F | P   | 1;186304261;C;T | 0.33 | missense_variant        | TPR    | .                 | .                        | tolerated(0.36)   | ENSP00000356448.3.p.Val1638Ile |
| MI-F | DM  | 1;186304262;C;T | 0.28 | splice_acceptor_variant | TPR    | .                 | .                        | .                 | .                              |
| MI-F | RM1 | 1;186304262;C;T | 0.41 | splice_acceptor_variant | TPR    | .                 | .                        | .                 | .                              |
| MI-F | RM2 | 1;186304262;C;T | 0.39 | splice_acceptor_variant | TPR    | .                 | .                        | .                 | .                              |
| MI-F | P   | 1;186304262;C;T | 0.35 | splice_acceptor_variant | TPR    | .                 | .                        | .                 | .                              |
| MI-F | DM  | 11;71732301;G;A | 0.50 | missense_variant        | NUMA1  | .                 | benign(0.273)            | deleterious(0.02) | ENSP00000444175.1.p.His137Tyr  |
| MI-F | RM1 | 11;71732301;G;A | 0.43 | missense_variant        | NUMA1  | .                 | benign(0.273)            | deleterious(0.02) | ENSP00000444175.1.p.His137Tyr  |
| MI-F | RM2 | 11;71732301;G;A | 0.50 | missense_variant        | NUMA1  | .                 | benign(0.273)            | deleterious(0.02) | ENSP00000444175.1.p.His137Tyr  |
| MI-F | P   | 11;71732301;G;A | 0.42 | missense_variant        | NUMA1  | .                 | benign(0.273)            | deleterious(0.02) | ENSP00000444175.1.p.His137Tyr  |
| MI-F | DM  | 15;40675107;C;T | 0.67 | missense_variant        | KNSTRN | 140056            | probably_damaging(0.983) | deleterious(0.01) | ENSP00000453213.1.p.Ser24Phe   |
| MI-F | RM1 | 15;40675107;C;T | 0.38 | missense_variant        | KNSTRN | 140056            | probably_damaging(0.983) | deleterious(0.01) | ENSP00000453213.1.p.Ser24Phe   |
| MI-F | RM2 | 15;40675107;C;T | 0.50 | missense_variant        | KNSTRN | 140056            | probably_damaging(0.983) | deleterious(0.01) | ENSP00000453213.1.p.Ser24Phe   |
| MI-F | P   | 15;40675107;C;T | 0.19 | missense_variant        | KNSTRN | 140056            | probably_damaging(0.983) | deleterious(0.01) | ENSP00000453213.1.p.Ser24Phe   |
| MI-F | DM  | 16;67694198;G;A | 0.50 | missense_variant        | ACD    | 135719            | possibly_damaging(0.86)  | tolerated(0.25)   | ENSP00000377496.4.p.Leu62Phe   |
| MI-F | RM1 | 16;67694198;G;A | 0.44 | missense_variant        | ACD    | 135719            | possibly_damaging(0.86)  | tolerated(0.25)   | ENSP00000377496.4.p.Leu62Phe   |
| MI-F | RM2 | 16;67694198;G;A | 0.49 | missense_variant        | ACD    | 135719            | possibly_damaging(0.86)  | tolerated(0.25)   | ENSP00000377496.4.p.Leu62Phe   |
| MI-F | P   | 16;67694198;G;A | 0.50 | missense_variant        | ACD    | 135719            | possibly_damaging(0.86)  | tolerated(0.25)   | ENSP00000377496.4.p.Leu62Phe   |
| MI-F | DM  | 16;67694228;G;A | 0.50 | missense_variant        | ACD    | .                 | possibly_damaging(0.587) | tolerated(0.3)    | ENSP00000377496.4.p.Leu52Phe   |
| MI-F | RM1 | 16;67694228;G;A | 0.42 | missense_variant        | ACD    | .                 | possibly_damaging(0.587) | tolerated(0.3)    | ENSP00000377496.4.p.Leu52Phe   |
| MI-F | RM2 | 16;67694228;G;A | 0.50 | missense_variant        | ACD    | .                 | possibly_damaging(0.587) | tolerated(0.3)    | ENSP00000377496.4.p.Leu52Phe   |
| MI-F | P   | 16;67694228;G;A | 0.47 | missense_variant        | ACD    | .                 | possibly_damaging(0.587) | tolerated(0.3)    | ENSP00000377496.4.p.Leu52Phe   |
| MI-F | DM  | 16;89825073;G;A | 0.48 | missense_variant        | FANCA  | .                 | probably_damaging(0.984) | tolerated(0.27)   | ENSP00000454217.1.p.Pro78Ser   |
| MI-F | RM1 | 16;89825073;G;A | 0.40 | missense_variant        | FANCA  | .                 | probably_damaging(0.984) | tolerated(0.27)   | ENSP00000454217.1.p.Pro78Ser   |
| MI-F | RM2 | 16;89825073;G;A | 0.38 | missense_variant        | FANCA  | .                 | probably_damaging(0.984) | tolerated(0.27)   | ENSP00000454217.1.p.Pro78Ser   |
| MI-F | P   | 16;89825073;G;A | 0.34 | missense_variant        | FANCA  | .                 | probably_damaging(0.984) | tolerated(0.27)   | ENSP00000454217.1.p.Pro78Ser   |
| MI-F | DM  | 17;59858236;G;A | 0.48 | missense_variant        | BRIP1  | .                 | benign(0.005)            | tolerated(1)      | ENSP00000464654.1.p.His587Tyr  |
| MI-F | RM1 | 17;59858236;G;A | 0.50 | missense_variant        | BRIP1  | .                 | benign(0.005)            | tolerated(1)      | ENSP00000464654.1.p.His587Tyr  |
| MI-F | RM2 | 17;59858236;G;A | 0.49 | missense_variant        | BRIP1  | .                 | benign(0.005)            | tolerated(1)      | ENSP00000464654.1.p.His587Tyr  |
| MI-F | P   | 17;59858236;G;A | 0.50 | missense_variant        | BRIP1  | .                 | benign(0.005)            | tolerated(1)      | ENSP00000464654.1.p.His587Tyr  |
| MI-F | DM  | 17;59870969;G;A | 0.50 | missense_variant        | BRIP1  | .                 | benign(0.117)            | tolerated(0.25)   | ENSP00000464654.1.p.Pro488Ser  |
| MI-F | RM1 | 17;59870969;G;A | 0.50 | missense_variant        | BRIP1  | .                 | benign(0.117)            | tolerated(0.25)   | ENSP00000464654.1.p.Pro488Ser  |
| MI-F | RM2 | 17;59870969;G;A | 0.50 | missense_variant        | BRIP1  | .                 | benign(0.117)            | tolerated(0.25)   | ENSP00000464654.1.p.Pro488Ser  |
| MI-F | P   | 17;59870969;G;A | 0.45 | missense_variant        | BRIP1  | .                 | benign(0.117)            | tolerated(0.25)   | ENSP00000464654.1.p.Pro488Ser  |
|      |     |                 |      |                         |        | 43,818,288,785,28 |                          |                   |                                |
|      |     |                 |      |                         |        | 8,700,000,000,000 |                          |                   |                                |
| MI-F | DM  | 17;7578517;G;A  | 0.50 | missense_variant        | TP53   | ,000              | possibly_damaging(0.661) | deleterious(0.03) | ENSP00000398846.2.p.Ala138Val  |
|      |     |                 |      |                         |        | 43,818,288,785,28 |                          |                   |                                |
|      |     |                 |      |                         |        | 8,700,000,000,000 |                          |                   |                                |
| MI-F | RM1 | 17;7578517;G;A  | 0.37 | missense_variant        | TP53   | ,000              | possibly_damaging(0.661) | deleterious(0.03) | ENSP00000398846.2.p.Ala138Val  |
|      |     |                 |      |                         |        | 43,818,288,785,28 |                          |                   |                                |
|      |     |                 |      |                         |        | 8,700,000,000,000 |                          |                   |                                |
| MI-F | RM2 | 17;7578517;G;A  | 0.39 | missense_variant        | TP53   | ,000              | possibly_damaging(0.661) | deleterious(0.03) | ENSP00000398846.2.p.Ala138Val  |

43,818,288,785,28  
8,700,000,000,000

|      |     |                  |      |                      |       |      |                          |                   |                                |
|------|-----|------------------|------|----------------------|-------|------|--------------------------|-------------------|--------------------------------|
| MI-F | P   | 17;7578517;G;A   | 0.47 | missense_variant     | TP53  | .000 | possibly_damaging(0.661) | deleterious(0.03) | ENSP00000398846.2;p.Ala138Val  |
| MI-F | DM  | 5;112154970;G;T  | 0.39 | missense_variant     | APC   | .    | possibly_damaging(0.762) | deleterious(0.02) | ENSP00000423828.2;p.Arg414Leu  |
| MI-F | RM1 | 5;112154970;G;T  | 0.48 | missense_variant     | APC   | .    | possibly_damaging(0.762) | deleterious(0.02) | ENSP00000423828.2;p.Arg414Leu  |
| MI-F | RM2 | 5;112154970;G;T  | 0.35 | missense_variant     | APC   | .    | possibly_damaging(0.762) | deleterious(0.02) | ENSP00000423828.2;p.Arg414Leu  |
| MI-F | P   | 5;112154970;G;T  | 0.33 | missense_variant     | APC   | .    | possibly_damaging(0.762) | deleterious(0.02) | ENSP00000423828.2;p.Arg414Leu  |
| MI-F | DM  | 5;112170771;C;T  | 0.33 | missense_variant     | APC   | .    | possibly_damaging(0.874) | deleterious(0.01) | ENSP00000473355.1;p.Arg186Trp  |
| MI-F | RM1 | 5;112170771;C;T  | 0.43 | missense_variant     | APC   | .    | possibly_damaging(0.874) | deleterious(0.01) | ENSP00000473355.1;p.Arg186Trp  |
| MI-F | RM2 | 5;112170771;C;T  | 0.47 | missense_variant     | APC   | .    | possibly_damaging(0.874) | deleterious(0.01) | ENSP00000473355.1;p.Arg186Trp  |
| MI-F | P   | 5;112170771;C;T  | 0.50 | missense_variant     | APC   | .    | possibly_damaging(0.874) | deleterious(0.01) | ENSP00000473355.1;p.Arg186Trp  |
| MI-F | DM  | 6;35427133;C;T   | 0.11 | missense_variant     | FANCE | .    | probably_damaging(0.999) | deleterious(0)    | ENSP00000229769.2;p.Ser380Phe  |
| MI-F | RM1 | 6;35427133;C;T   | 0.25 | missense_variant     | FANCE | .    | probably_damaging(0.999) | deleterious(0)    | ENSP00000229769.2;p.Ser380Phe  |
| MI-F | RM2 | 6;35427133;C;T   | 0.27 | missense_variant     | FANCE | .    | probably_damaging(0.999) | deleterious(0)    | ENSP00000229769.2;p.Ser380Phe  |
| MI-F | P   | 6;35427133;C;T   | 0.22 | missense_variant     | FANCE | .    | probably_damaging(0.999) | deleterious(0)    | ENSP00000229769.2;p.Ser380Phe  |
| MI-F | DM  | 7;91570420;G;A   | 0.46 | missense_variant     | AKAP9 | .    | probably_damaging(0.999) | deleterious(0)    | ENSP00000350813.2;p.Asp3Asn    |
| MI-F | RM1 | 7;91570420;G;A   | 0.33 | missense_variant     | AKAP9 | .    | probably_damaging(0.999) | deleterious(0)    | ENSP00000350813.2;p.Asp3Asn    |
| MI-F | RM2 | 7;91570420;G;A   | 0.44 | missense_variant     | AKAP9 | .    | probably_damaging(0.999) | deleterious(0)    | ENSP00000350813.2;p.Asp3Asn    |
| MI-F | P   | 7;91570420;G;A   | 0.50 | missense_variant     | AKAP9 | .    | probably_damaging(0.999) | deleterious(0)    | ENSP00000350813.2;p.Asp3Asn    |
| MI-F | DM  | 8;30921942;C;T   | 0.67 | missense_variant     | WRN   | .    | probably_damaging(0.921) | deleterious(0)    | ENSP00000298139.5;p.Ser116Phe  |
| MI-F | RM1 | 8;30921942;C;T   | 0.50 | missense_variant     | WRN   | .    | probably_damaging(0.921) | deleterious(0)    | ENSP00000298139.5;p.Ser116Phe  |
| MI-F | RM2 | 8;30921942;C;T   | 0.44 | missense_variant     | WRN   | .    | probably_damaging(0.921) | deleterious(0)    | ENSP00000298139.5;p.Ser116Phe  |
| MI-F | P   | 8;30921942;C;T   | 0.50 | missense_variant     | WRN   | .    | probably_damaging(0.921) | deleterious(0)    | ENSP00000298139.5;p.Ser116Phe  |
| MI-F | DM  | 9;123874812;A;G  | 0.41 | missense_variant     | CNTRL | .    | probably_damaging(0.998) | deleterious(0)    | ENSP00000238341.5;p.Lys360Glu  |
| MI-F | RM1 | 9;123874812;A;G  | 0.45 | missense_variant     | CNTRL | .    | probably_damaging(0.998) | deleterious(0)    | ENSP00000238341.5;p.Lys360Glu  |
| MI-F | RM2 | 9;123874812;A;G  | 0.41 | missense_variant     | CNTRL | .    | probably_damaging(0.998) | deleterious(0)    | ENSP00000238341.5;p.Lys360Glu  |
| MI-F | P   | 9;123874812;A;G  | 0.50 | missense_variant     | CNTRL | .    | probably_damaging(0.998) | deleterious(0)    | ENSP00000238341.5;p.Lys360Glu  |
| SK-G | RM  | 15;40505576;T;G  | 0.49 | missense_variant     | BUB1B | .    | possibly_damaging(0.742) | deleterious(0.01) | ENSP00000287598.6;p.Val860Gly  |
| SK-G | DM  | 15;40505576;T;G  | 0.65 | missense_variant     | BUB1B | .    | possibly_damaging(0.742) | deleterious(0.01) | ENSP00000287598.6;p.Val860Gly  |
| SK-G | P   | 15;40505576;T;G  | 0.42 | missense_variant     | BUB1B | .    | possibly_damaging(0.742) | deleterious(0.01) | ENSP00000287598.6;p.Val860Gly  |
| SK-G | RM  | 17;57739005;G;A  | 0.29 | splice_donor_variant | CLTC  | .    | .                        | .                 | .                              |
| SK-G | RM  | 17;59924545;T;A  | 0.62 | missense_variant     | BRIP1 | .    | benign(0.001)            | tolerated(0.72)   | ENSP00000464654.1;p.Asn182Tyr  |
| SK-G | DM  | 17;59924545;T;A  | 0.30 | missense_variant     | BRIP1 | .    | benign(0.001)            | tolerated(0.72)   | ENSP00000464654.1;p.Asn182Tyr  |
| SK-G | P   | 17;59924545;T;A  | 0.48 | missense_variant     | BRIP1 | .    | benign(0.001)            | tolerated(0.72)   | ENSP00000464654.1;p.Asn182Tyr  |
| SK-G | RM  | 17;59924546;G;T  | 0.61 | missense_variant     | BRIP1 | .    | benign(0.002)            | tolerated(0.52)   | ENSP00000464654.1;p.His181Gln  |
| SK-G | DM  | 17;59924546;G;T  | 0.31 | missense_variant     | BRIP1 | .    | benign(0.002)            | tolerated(0.52)   | ENSP00000464654.1;p.His181Gln  |
| SK-G | P   | 17;59924546;G;T  | 0.48 | missense_variant     | BRIP1 | .    | benign(0.002)            | tolerated(0.52)   | ENSP00000464654.1;p.His181Gln  |
| SK-H | RM1 | 1;156085052;G;A  | 0.10 | missense_variant     | LMNA  | .    | benign(0.395)            | tolerated(0.11)   | ENSP00000357283.4;p.Glu115Lys  |
| SK-H | DM  | 1;156105807;G;A  | 0.29 | missense_variant     | LMNA  | .    | benign(0.036)            | tolerated(0.45)   | ENSP00000357283.4;p.Arg351Lys  |
| SK-H | RM2 | 1;186328986;T;C  | 0.27 | missense_variant     | TPR   | .    | .                        | deleterious(0.01) | ENSP00000356448.3;p.Glu445Gly  |
| SK-H | P   | 1;186340104;G;A  | 0.67 | stop_gained          | TPR   | .    | .                        | .                 | ENSP00000356448.3;p.Gln110Ter  |
| SK-H | RM1 | 11;108158333;C;T | 0.26 | missense_variant     | ATM   | .    | benign(0.169)            | tolerated(0.09)   | ENSP00000434327.2;p.His3Tyr    |
| SK-H | DM  | 11;108165675;G;A | 0.34 | missense_variant     | ATM   | .    | benign(0.059)            | tolerated(0.51)   | ENSP00000278616.4;p.Val1600Ile |

|      |     |                  |      |                      |        |                   |                          |                   |                                |
|------|-----|------------------|------|----------------------|--------|-------------------|--------------------------|-------------------|--------------------------------|
| SK-H | RM1 | 11;71726660;G;A  | 0.09 | missense_variant     | NUMA1  | .                 | possibly_damaging(0.61)  | tolerated(0.08)   | ENSP00000442936.1;p.Ala630Val  |
|      |     |                  |      |                      |        | 11,800,141,180,01 |                          |                   |                                |
| SK-H | DM  | 12;133210778;C;T | 0.31 | missense_variant     | POLE   | 5                 | benign(0.005)            | tolerated(1)      | ENSP00000445753.1;p.Val1973Ile |
| SK-H | DM  | 13;103527861;A;G | 0.42 | missense_variant     | ERCC5  | .                 | benign(0.293)            | tolerated(0.17)   | ENSP00000365121.1;p.Lys290Glu  |
| SK-H | DM  | 15;40488976;G;A  | 0.38 | splice_donor_variant | BUB1B  | .                 | .                        | .                 | .                              |
| SK-H | RM1 | 16;23634381;C;T  | 0.10 | missense_variant     | PALB2  | .                 | possibly_damaging(0.825) | tolerated(0.06)   | ENSP00000261584.4;p.Val969Met  |
| SK-H | RM2 | 17;41244330;C;T  | 0.44 | missense_variant     | BRCA1  | .                 | benign(0.159)            | tolerated(0.18)   | ENSP00000418960.2;p.Gly1073Asp |
| SK-H | RM2 | 17;7578278;G;A   | 0.29 | missense_variant     | TP53   | 43702             | possibly_damaging(0.847) | deleterious(0.04) | ENSP00000398846.2;p.Pro191Ser  |
| SK-H | RM2 | 2;109381175;G;A  | 0.23 | missense_variant     | RANBP2 | .                 | benign(0.039)            | tolerated(0.21)   | ENSP00000283195.6;p.Val1394Ile |
| SK-H | RM2 | 2;48030675;C;T   | 0.42 | missense_variant     | MSH6   | .                 | probably_damaging(1)     | deleterious(0)    | ENSP00000446475.1;p.Pro967Ser  |
| SK-H | RM1 | 2;48030802;G;A   | 0.28 | missense_variant     | MSH6   | .                 | probably_damaging(0.998) | deleterious(0)    | ENSP00000446475.1;p.Gly1009Asp |
| SK-H | RM1 | 22;41574425;G;A  | 0.09 | missense_variant     | EP300  | .                 | possibly_damaging(0.886) | tolerated(0.07)   | ENSP00000263253.7;p.Gly2237Glu |
| SK-H | RM1 | 3;142231107;G;T  | 0.50 | stop_gained          | ATR    | .                 | .                        | .                 | ENSP00000343741.4;p.Ser1616Ter |
| SK-H | RM2 | 3;142231107;G;T  | 0.59 | stop_gained          | ATR    | .                 | .                        | .                 | ENSP00000343741.4;p.Ser1616Ter |
| SK-H | RM2 | 5;112179165;G;A  | 0.48 | missense_variant     | APC    | .                 | benign(0.001)            | tolerated(0.52)   | ENSP00000427089.2;p.Ser2625Asn |
| SK-H | RM1 | 5;1268736;C;T    | 0.05 | missense_variant     | TERT   | .                 | possibly_damaging(0.618) | deleterious(0)    | ENSP00000425003.1;p.Val755Met  |
| SK-H | RM2 | 5;1293427;C;T    | 0.08 | splice_donor_variant | TERT   | .                 | .                        | .                 | .                              |
| SK-H | DM  | 5;1293592;C;T    | 0.05 | missense_variant     | TERT   | .                 | possibly_damaging(0.603) | tolerated(0.3)    | ENSP00000425003.1;p.Arg470His  |
| SK-H | RM1 | 7;91712601;G;A   | 0.10 | missense_variant     | AKAP9  | .                 | benign(0.047)            | tolerated(0.21)   | ENSP00000350813.2;p.Glu2772Lys |
| SK-H | DM  | 7;91714177;C;T   | 0.13 | stop_gained          | AKAP9  | .                 | .                        | .                 | ENSP00000378042.2;p.Gln765Ter  |
| SK-H | RM2 | 7;91718700;G;A   | 0.11 | missense_variant     | AKAP9  | .                 | benign(0.234)            | tolerated(1)      | ENSP00000350813.2;p.Gly3022Asp |

**Supplementary Table 11. Mutations gained or increased in allelic dose with a genome doubling event for patients CAS-G, CAS-D, CAS-C and ETH-E.**

| Patient | Sample | Variant         | MAF   | Mutation Type    | Gene     | COSMIC | Polyphen2                 | SIFT               | AA Change                      |
|---------|--------|-----------------|-------|------------------|----------|--------|---------------------------|--------------------|--------------------------------|
| CAS-G   | DM1    | 12;40076528;C;T | 0.51  | missense variant | C12orf40 | .      | possibly damaging (0.878) | deleterious (0.03) | ENSP00000473371.1:p.His191Tyr  |
| CAS-G   | DM2    | 12;40076528;C;T | 0.67  | missense variant | C12orf40 | .      | possibly damaging (0.878) | deleterious (0.03) | ENSP00000473371.1:p.His191Tyr  |
| CAS-G   | DM3    | 12;40076528;C;T | 0.57  | missense variant | C12orf40 | .      | possibly damaging (0.878) | deleterious (0.03) | ENSP00000473371.1:p.His191Tyr  |
| CAS-G   | DM4    | 12;40076528;C;T | 0.63  | missense variant | C12orf40 | .      | possibly damaging (0.878) | deleterious (0.03) | ENSP00000473371.1:p.His191Tyr  |
| CAS-G   | DM5    | 12;40076528;C;T | 0.50  | missense variant | C12orf40 | .      | possibly damaging (0.878) | deleterious (0.03) | ENSP00000473371.1:p.His191Tyr  |
| CAS-G   | DM6    | 12;40076528;C;T | 0.67  | missense variant | C12orf40 | .      | possibly damaging (0.878) | deleterious (0.03) | ENSP00000473371.1:p.His191Tyr  |
| CAS-G   | P      | 12;40076528;C;T | 0.02  | missense variant | C12orf40 | .      | possibly damaging (0.878) | deleterious (0.03) | ENSP00000473371.1:p.His191Tyr  |
| CAS-G   | RM     | 12;40076528;C;T | 0.005 | missense variant | C12orf40 | .      | possibly damaging (0.878) | deleterious (0.03) | ENSP00000473371.1:p.His191Tyr  |
| CAS-G   | DM1    | 1;75097441;G;A  | 0.61  | missense variant | C1orf173 | 912103 | benign (0.296)            | deleterious (0)    | ENSP00000473404.1:p.Arg62Cys   |
| CAS-G   | DM2    | 1;75097441;G;A  | 0.59  | missense variant | C1orf173 | 912103 | benign (0.296)            | deleterious (0)    | ENSP00000473404.1:p.Arg62Cys   |
| CAS-G   | DM3    | 1;75097441;G;A  | 0.61  | missense variant | C1orf173 | 912103 | benign (0.296)            | deleterious (0)    | ENSP00000473404.1:p.Arg62Cys   |
| CAS-G   | DM4    | 1;75097441;G;A  | 0.67  | missense variant | C1orf173 | 912103 | benign (0.296)            | deleterious (0)    | ENSP00000473404.1:p.Arg62Cys   |
| CAS-G   | DM5    | 1;75097441;G;A  | 0.67  | missense variant | C1orf173 | 912103 | benign (0.296)            | deleterious (0)    | ENSP00000473404.1:p.Arg62Cys   |
| CAS-G   | DM6    | 1;75097441;G;A  | 0.60  | missense variant | C1orf173 | 912103 | benign (0.296)            | deleterious (0)    | ENSP00000473404.1:p.Arg62Cys   |
| CAS-G   | P      | 1;75097441;G;A  | 0.34  | missense variant | C1orf173 | 912103 | benign (0.296)            | deleterious (0)    | ENSP00000473404.1:p.Arg62Cys   |
| CAS-G   | RM     | 1;75097441;G;A  | 0.28  | missense variant | C1orf173 | 912103 | benign (0.296)            | deleterious (0)    | ENSP00000473404.1:p.Arg62Cys   |
| CAS-G   | DM1    | 1;155013029;C;T | 0.50  | stop gained      | DCST1    | .      | .                         | .                  | ENSP00000295542.1:p.Gln154Ter  |
| CAS-G   | DM2    | 1;155013029;C;T | 0.50  | stop gained      | DCST1    | .      | .                         | .                  | ENSP00000295542.1:p.Gln154Ter  |
| CAS-G   | DM3    | 1;155013029;C;T | 0.50  | stop gained      | DCST1    | .      | .                         | .                  | ENSP00000295542.1:p.Gln154Ter  |
| CAS-G   | DM4    | 1;155013029;C;T | 0.42  | stop gained      | DCST1    | .      | .                         | .                  | ENSP00000295542.1:p.Gln154Ter  |
| CAS-G   | DM5    | 1;155013029;C;T | 0.50  | stop gained      | DCST1    | .      | .                         | .                  | ENSP00000295542.1:p.Gln154Ter  |
| CAS-G   | DM6    | 1;155013029;C;T | 0.50  | stop gained      | DCST1    | .      | .                         | .                  | ENSP00000295542.1:p.Gln154Ter  |
| CAS-G   | DM1    | 11;6561242;C;A  | 0.28  | missense variant | DNHD1    | .      | possibly damaging (0.804) | deleterious (0.01) | ENSP00000254579.6:p.Ser1186Tyr |

|       |     |                  |      |                  |        |   |                           |                    |                                |
|-------|-----|------------------|------|------------------|--------|---|---------------------------|--------------------|--------------------------------|
| CAS-G | DM2 | 11;6561242;C;A   | 0.28 | missense variant | DNHD1  | . | possibly damaging (0.804) | deleterious (0.01) | ENSP00000254579.6:p.Ser1186Tyr |
| CAS-G | DM3 | 11;6561242;C;A   | 0.24 | missense variant | DNHD1  | . | possibly damaging (0.804) | deleterious (0.01) | ENSP00000254579.6:p.Ser1186Tyr |
| CAS-G | DM4 | 11;6561242;C;A   | 0.31 | missense variant | DNHD1  | . | possibly damaging (0.804) | deleterious (0.01) | ENSP00000254579.6:p.Ser1186Tyr |
| CAS-G | DM5 | 11;6561242;C;A   | 0.26 | missense variant | DNHD1  | . | possibly damaging (0.804) | deleterious (0.01) | ENSP00000254579.6:p.Ser1186Tyr |
| CAS-G | DM6 | 11;6561242;C;A   | 0.32 | missense variant | DNHD1  | . | possibly damaging (0.804) | deleterious (0.01) | ENSP00000254579.6:p.Ser1186Tyr |
| CAS-G | DM1 | 12;132445369;G;T | 0.49 | missense variant | EP400  | . | unknown (0)               | deleterious (0)    | ENSP00000330620.6:p.Gly69Trp   |
| CAS-G | DM2 | 12;132445369;G;T | 0.44 | missense variant | EP400  | . | unknown (0)               | deleterious (0)    | ENSP00000330620.6:p.Gly69Trp   |
| CAS-G | DM3 | 12;132445369;G;T | 0.36 | missense variant | EP400  | . | unknown (0)               | deleterious (0)    | ENSP00000330620.6:p.Gly69Trp   |
| CAS-G | DM4 | 12;132445369;G;T | 0.28 | missense variant | EP400  | . | unknown (0)               | deleterious (0)    | ENSP00000330620.6:p.Gly69Trp   |
| CAS-G | DM5 | 12;132445369;G;T | 0.44 | missense variant | EP400  | . | unknown (0)               | deleterious (0)    | ENSP00000330620.6:p.Gly69Trp   |
| CAS-G | DM6 | 12;132445369;G;T | 0.44 | missense variant | EP400  | . | unknown (0)               | deleterious (0)    | ENSP00000330620.6:p.Gly69Trp   |
| CAS-G | DM1 | 8;124998329;G;A  | 0.60 | missense variant | FER1L6 | . | benign (0.184)            | deleterious (0.01) | ENSP00000381982.1:p.Glu478Lys  |
| CAS-G | DM2 | 8;124998329;G;A  | 0.54 | missense variant | FER1L6 | . | benign (0.184)            | deleterious (0.01) | ENSP00000381982.1:p.Glu478Lys  |
| CAS-G | DM3 | 8;124998329;G;A  | 0.47 | missense variant | FER1L6 | . | benign (0.184)            | deleterious (0.01) | ENSP00000381982.1:p.Glu478Lys  |
| CAS-G | DM4 | 8;124998329;G;A  | 0.53 | missense variant | FER1L6 | . | benign (0.184)            | deleterious (0.01) | ENSP00000381982.1:p.Glu478Lys  |
| CAS-G | DM5 | 8;124998329;G;A  | 0.49 | missense variant | FER1L6 | . | benign (0.184)            | deleterious (0.01) | ENSP00000381982.1:p.Glu478Lys  |
| CAS-G | DM6 | 8;124998329;G;A  | 0.55 | missense variant | FER1L6 | . | benign (0.184)            | deleterious (0.01) | ENSP00000381982.1:p.Glu478Lys  |
| CAS-G | P   | 8;124998329;G;A  | 0.28 | missense variant | FER1L6 | . | benign (0.184)            | deleterious (0.01) | ENSP00000381982.1:p.Glu478Lys  |
| CAS-G | RM  | 8;124998329;G;A  | 0.30 | missense variant | FER1L6 | . | benign (0.184)            | deleterious (0.01) | ENSP00000381982.1:p.Glu478Lys  |
| CAS-G | DM1 | 13;32841312;G;A  | 0.28 | missense variant | FRY    | . | benign (0.017)            | tolerated (0.69)   | ENSP00000369600.3:p.Gly2651Glu |
| CAS-G | DM2 | 13;32841312;G;A  | 0.30 | missense variant | FRY    | . | benign (0.017)            | tolerated (0.69)   | ENSP00000369600.3:p.Gly2651Glu |
| CAS-G | DM3 | 13;32841312;G;A  | 0.25 | missense variant | FRY    | . | benign (0.017)            | tolerated (0.69)   | ENSP00000369600.3:p.Gly2651Glu |
| CAS-G | DM4 | 13;32841312;G;A  | 0.32 | missense variant | FRY    | . | benign (0.017)            | tolerated (0.69)   | ENSP00000369600.3:p.Gly2651Glu |
| CAS-G | DM5 | 13;32841312;G;A  | 0.41 | missense variant | FRY    | . | benign (0.017)            | tolerated (0.69)   | ENSP00000369600.3:p.Gly2651Glu |
| CAS-G | DM6 | 13;32841312;G;A  | 0.34 | missense variant | FRY    | . | benign (0.017)            | tolerated (0.69)   | ENSP00000369600.3:p.Gly2651Glu |
| CAS-G | DM1 | 7;150439446;G;A  | 0.61 | stop gained      | GIMAP5 | . | .                         | .                  | ENSP00000351473.3:p.Trp73Ter   |
| CAS-G | DM2 | 7;150439446;G;A  | 0.63 | stop gained      | GIMAP5 | . | .                         | .                  | ENSP00000351473.3:p.Trp73Ter   |
| CAS-G | DM3 | 7;150439446;G;A  | 0.63 | stop gained      | GIMAP5 | . | .                         | .                  | ENSP00000351473.3:p.Trp73Ter   |

|       |     |                 |      |                  |         |   |                           |                    |                                |
|-------|-----|-----------------|------|------------------|---------|---|---------------------------|--------------------|--------------------------------|
| CAS-G | DM4 | 7;150439446;G;A | 0.63 | stop gained      | GIMAP5  | . | .                         | .                  | ENSP00000351473.3:p.Trp73Ter   |
| CAS-G | DM5 | 7;150439446;G;A | 0.59 | stop gained      | GIMAP5  | . | .                         | .                  | ENSP00000351473.3:p.Trp73Ter   |
| CAS-G | DM6 | 7;150439446;G;A | 0.57 | stop gained      | GIMAP5  | . | .                         | .                  | ENSP00000351473.3:p.Trp73Ter   |
| CAS-G | P   | 7;150439446;G;A | 0.44 | stop gained      | GIMAP5  | . | .                         | .                  | ENSP00000351473.3:p.Trp73Ter   |
| CAS-G | RM  | 7;150439446;G;A | 0.44 | stop gained      | GIMAP5  | . | .                         | .                  | ENSP00000351473.3:p.Trp73Ter   |
| CAS-G | DM1 | 5;35876232;G;T  | 0.34 | missense variant | IL7R    | . | probably damaging (0.965) | deleterious (0)    | ENSP00000306157.3:p.Gly342Trp  |
| CAS-G | DM2 | 5;35876232;G;T  | 0.32 | missense variant | IL7R    | . | probably damaging (0.965) | deleterious (0)    | ENSP00000306157.3:p.Gly342Trp  |
| CAS-G | DM3 | 5;35876232;G;T  | 0.32 | missense variant | IL7R    | . | probably damaging (0.965) | deleterious (0)    | ENSP00000306157.3:p.Gly342Trp  |
| CAS-G | DM4 | 5;35876232;G;T  | 0.33 | missense variant | IL7R    | . | probably damaging (0.965) | deleterious (0)    | ENSP00000306157.3:p.Gly342Trp  |
| CAS-G | DM5 | 5;35876232;G;T  | 0.37 | missense variant | IL7R    | . | probably damaging (0.965) | deleterious (0)    | ENSP00000306157.3:p.Gly342Trp  |
| CAS-G | DM6 | 5;35876232;G;T  | 0.33 | missense variant | IL7R    | . | probably damaging (0.965) | deleterious (0)    | ENSP00000306157.3:p.Gly342Trp  |
| CAS-G | DM1 | 4;6107610;G;A   | 0.26 | missense variant | JAKMIP1 | . | probably damaging (0.993) | deleterious (0.03) | ENSP00000282924.5:p.Leu72Phe   |
| CAS-G | DM2 | 4;6107610;G;A   | 0.36 | missense variant | JAKMIP1 | . | probably damaging (0.993) | deleterious (0.03) | ENSP00000282924.5:p.Leu72Phe   |
| CAS-G | DM3 | 4;6107610;G;A   | 0.26 | missense variant | JAKMIP1 | . | probably damaging (0.993) | deleterious (0.03) | ENSP00000282924.5:p.Leu72Phe   |
| CAS-G | DM4 | 4;6107610;G;A   | 0.22 | missense variant | JAKMIP1 | . | probably damaging (0.993) | deleterious (0.03) | ENSP00000282924.5:p.Leu72Phe   |
| CAS-G | DM5 | 4;6107610;G;A   | 0.22 | missense variant | JAKMIP1 | . | probably damaging (0.993) | deleterious (0.03) | ENSP00000282924.5:p.Leu72Phe   |
| CAS-G | DM6 | 4;6107610;G;A   | 0.26 | missense variant | JAKMIP1 | . | probably damaging (0.993) | deleterious (0.03) | ENSP00000282924.5:p.Leu72Phe   |
| CAS-G | DM1 | X;8502447;C;T   | 0.67 | missense variant | KAL1    | . | possibly damaging (0.609) | tolerated (0.05)   | ENSP00000262648.3:p.Glu633Lys  |
| CAS-G | DM2 | X;8502447;C;T   | 0.67 | missense variant | KAL1    | . | possibly damaging (0.609) | tolerated (0.05)   | ENSP00000262648.3:p.Glu633Lys  |
| CAS-G | DM3 | X;8502447;C;T   | 0.61 | missense variant | KAL1    | . | possibly damaging (0.609) | tolerated (0.05)   | ENSP00000262648.3:p.Glu633Lys  |
| CAS-G | DM4 | X;8502447;C;T   | 0.62 | missense variant | KAL1    | . | possibly damaging (0.609) | tolerated (0.05)   | ENSP00000262648.3:p.Glu633Lys  |
| CAS-G | DM5 | X;8502447;C;T   | 0.59 | missense variant | KAL1    | . | possibly damaging (0.609) | tolerated (0.05)   | ENSP00000262648.3:p.Glu633Lys  |
| CAS-G | DM6 | X;8502447;C;T   | 0.66 | missense variant | KAL1    | . | possibly damaging (0.609) | tolerated (0.05)   | ENSP00000262648.3:p.Glu633Lys  |
| CAS-G | P   | X;8502447;C;T   | 0.45 | missense variant | KAL1    | . | possibly damaging (0.609) | tolerated (0.05)   | ENSP00000262648.3:p.Glu633Lys  |
| CAS-G | RM  | X;8502447;C;T   | 0.46 | missense variant | KAL1    | . | possibly damaging (0.609) | tolerated (0.05)   | ENSP00000262648.3:p.Glu633Lys  |
| CAS-G | DM1 | 5;137753192;A;T | 0.32 | missense variant | KDM3B   | . | benign (0.056)            | tolerated (0.3)    | ENSP00000326563.5:p.Met1110Leu |
| CAS-G | DM2 | 5;137753192;A;T | 0.27 | missense variant | KDM3B   | . | benign (0.056)            | tolerated (0.3)    | ENSP00000326563.5:p.Met1110Leu |
| CAS-G | DM3 | 5;137753192;A;T | 0.27 | missense variant | KDM3B   | . | benign (0.056)            | tolerated (0.3)    | ENSP00000326563.5:p.Met1110Leu |

|       |     |                 |      |                  |        |   |                           |                    |                                |
|-------|-----|-----------------|------|------------------|--------|---|---------------------------|--------------------|--------------------------------|
| CAS-G | DM4 | 5;137753192;A;T | 0.27 | missense variant | KDM3B  | . | benign (0.056)            | tolerated (0.3)    | ENSP00000326563.5:p.Met1110Leu |
| CAS-G | DM5 | 5;137753192;A;T | 0.26 | missense variant | KDM3B  | . | benign (0.056)            | tolerated (0.3)    | ENSP00000326563.5:p.Met1110Leu |
| CAS-G | DM6 | 5;137753192;A;T | 0.28 | missense variant | KDM3B  | . | benign (0.056)            | tolerated (0.3)    | ENSP00000326563.5:p.Met1110Leu |
| CAS-G | DM1 | 19;54760019;G;T | 0.17 | missense variant | LILRB5 | . | possibly damaging (0.497) | deleterious (0.05) | ENSP00000320390.5:p.Pro181His  |
| CAS-G | DM2 | 19;54760019;G;T | 0.21 | missense variant | LILRB5 | . | possibly damaging (0.497) | deleterious (0.05) | ENSP00000320390.5:p.Pro181His  |
| CAS-G | DM3 | 19;54760019;G;T | 0.25 | missense variant | LILRB5 | . | possibly damaging (0.497) | deleterious (0.05) | ENSP00000320390.5:p.Pro181His  |
| CAS-G | DM4 | 19;54760019;G;T | 0.30 | missense variant | LILRB5 | . | possibly damaging (0.497) | deleterious (0.05) | ENSP00000320390.5:p.Pro181His  |
| CAS-G | DM5 | 19;54760019;G;T | 0.25 | missense variant | LILRB5 | . | possibly damaging (0.497) | deleterious (0.05) | ENSP00000320390.5:p.Pro181His  |
| CAS-G | DM6 | 19;54760019;G;T | 0.17 | missense variant | LILRB5 | . | possibly damaging (0.497) | deleterious (0.05) | ENSP00000320390.5:p.Pro181His  |
| CAS-G | DM1 | 6;105474276;G;A | 0.67 | missense variant | LIN28B | . | probably damaging (0.977) | deleterious (0.01) | ENSP00000344401.4:p.Gly101Glu  |
| CAS-G | DM2 | 6;105474276;G;A | 0.63 | missense variant | LIN28B | . | probably damaging (0.977) | deleterious (0.01) | ENSP00000344401.4:p.Gly101Glu  |
| CAS-G | DM3 | 6;105474276;G;A | 0.63 | missense variant | LIN28B | . | probably damaging (0.977) | deleterious (0.01) | ENSP00000344401.4:p.Gly101Glu  |
| CAS-G | DM4 | 6;105474276;G;A | 0.67 | missense variant | LIN28B | . | probably damaging (0.977) | deleterious (0.01) | ENSP00000344401.4:p.Gly101Glu  |
| CAS-G | DM5 | 6;105474276;G;A | 0.67 | missense variant | LIN28B | . | probably damaging (0.977) | deleterious (0.01) | ENSP00000344401.4:p.Gly101Glu  |
| CAS-G | DM6 | 6;105474276;G;A | 0.64 | missense variant | LIN28B | . | probably damaging (0.977) | deleterious (0.01) | ENSP00000344401.4:p.Gly101Glu  |
| CAS-G | P   | 6;105474276;G;A | 0.50 | missense variant | LIN28B | . | probably damaging (0.977) | deleterious (0.01) | ENSP00000344401.4:p.Gly101Glu  |
| CAS-G | RM  | 6;105474276;G;A | 0.41 | missense variant | LIN28B | . | probably damaging (0.977) | deleterious (0.01) | ENSP00000344401.4:p.Gly101Glu  |
| CAS-G | DM1 | 7;141736632;C;T | 0.67 | missense variant | MGAM   | . | probably damaging (0.997) | deleterious (0)    | ENSP00000447378.2:p.Pro696Ser  |
| CAS-G | DM2 | 7;141736632;C;T | 0.67 | missense variant | MGAM   | . | probably damaging (0.997) | deleterious (0)    | ENSP00000447378.2:p.Pro696Ser  |
| CAS-G | DM3 | 7;141736632;C;T | 0.63 | missense variant | MGAM   | . | probably damaging (0.997) | deleterious (0)    | ENSP00000447378.2:p.Pro696Ser  |
| CAS-G | DM4 | 7;141736632;C;T | 0.61 | missense variant | MGAM   | . | probably damaging (0.997) | deleterious (0)    | ENSP00000447378.2:p.Pro696Ser  |
| CAS-G | DM5 | 7;141736632;C;T | 0.60 | missense variant | MGAM   | . | probably damaging (0.997) | deleterious (0)    | ENSP00000447378.2:p.Pro696Ser  |
| CAS-G | DM6 | 7;141736632;C;T | 0.67 | missense variant | MGAM   | . | probably damaging (0.997) | deleterious (0)    | ENSP00000447378.2:p.Pro696Ser  |
| CAS-G | P   | 7;141736632;C;T | 0.49 | missense variant | MGAM   | . | probably damaging (0.997) | deleterious (0)    | ENSP00000447378.2:p.Pro696Ser  |
| CAS-G | RM  | 7;141736632;C;T | 0.38 | missense variant | MGAM   | . | probably damaging (0.997) | deleterious (0)    | ENSP00000447378.2:p.Pro696Ser  |
| CAS-G | DM1 | 8;16885128;C;T  | 0.67 | missense variant | MICU3  | . | benign (0.249)            | deleterious (0)    | ENSP00000321455.5:p.Arg114Trp  |
| CAS-G | DM2 | 8;16885128;C;T  | 0.67 | missense variant | MICU3  | . | benign (0.249)            | deleterious (0)    | ENSP00000321455.5:p.Arg114Trp  |
| CAS-G | DM3 | 8;16885128;C;T  | 0.67 | missense variant | MICU3  | . | benign (0.249)            | deleterious (0)    | ENSP00000321455.5:p.Arg114Trp  |



|       |     |                 |       |                  |         |   |                           |                    |                               |
|-------|-----|-----------------|-------|------------------|---------|---|---------------------------|--------------------|-------------------------------|
| CAS-G | DM4 | 8;16885128;C;T  | 0.67  | missense variant | MICU3   | . | benign (0.249)            | deleterious (0)    | ENSP00000321455.5:p.Arg114Trp |
| CAS-G | DM5 | 8;16885128;C;T  | 0.67  | missense variant | MICU3   | . | benign (0.249)            | deleterious (0)    | ENSP00000321455.5:p.Arg114Trp |
| CAS-G | DM6 | 8;16885128;C;T  | 0.67  | missense variant | MICU3   | . | benign (0.249)            | deleterious (0)    | ENSP00000321455.5:p.Arg114Trp |
| CAS-G | P   | 8;16885128;C;T  | 0.47  | missense variant | MICU3   | . | benign (0.249)            | deleterious (0)    | ENSP00000321455.5:p.Arg114Trp |
| CAS-G | RM  | 8;16885128;C;T  | 0.49  | missense variant | MICU3   | . | benign (0.249)            | deleterious (0)    | ENSP00000321455.5:p.Arg114Trp |
| CAS-G | DM1 | 2;242794820;G;A | 0.53  | missense variant | PDCD1   | . | possibly damaging (0.851) | deleterious (0.01) | ENSP00000340808.3:p.Pro74Leu  |
| CAS-G | DM2 | 2;242794820;G;A | 0.50  | missense variant | PDCD1   | . | possibly damaging (0.851) | deleterious (0.01) | ENSP00000340808.3:p.Pro74Leu  |
| CAS-G | DM3 | 2;242794820;G;A | 0.49  | missense variant | PDCD1   | . | possibly damaging (0.851) | deleterious (0.01) | ENSP00000340808.3:p.Pro74Leu  |
| CAS-G | DM4 | 2;242794820;G;A | 0.58  | missense variant | PDCD1   | . | possibly damaging (0.851) | deleterious (0.01) | ENSP00000340808.3:p.Pro74Leu  |
| CAS-G | DM5 | 2;242794820;G;A | 0.50  | missense variant | PDCD1   | . | possibly damaging (0.851) | deleterious (0.01) | ENSP00000340808.3:p.Pro74Leu  |
| CAS-G | DM6 | 2;242794820;G;A | 0.48  | missense variant | PDCD1   | . | possibly damaging (0.851) | deleterious (0.01) | ENSP00000340808.3:p.Pro74Leu  |
| CAS-G | P   | 2;242794820;G;A | 0.32  | missense variant | PDCD1   | . | possibly damaging (0.851) | deleterious (0.01) | ENSP00000340808.3:p.Pro74Leu  |
| CAS-G | RM  | 2;242794820;G;A | 0.32  | missense variant | PDCD1   | . | possibly damaging (0.851) | deleterious (0.01) | ENSP00000340808.3:p.Pro74Leu  |
| CAS-G | DM1 | 7;103290772;G;A | 0.40  | missense variant | RELN    | . | probably damaging (0.999) | deleterious (0)    | ENSP00000345694.5:p.Arg651Cys |
| CAS-G | DM2 | 7;103290772;G;A | 0.36  | missense variant | RELN    | . | probably damaging (0.999) | deleterious (0)    | ENSP00000345694.5:p.Arg651Cys |
| CAS-G | DM3 | 7;103290772;G;A | 0.33  | missense variant | RELN    | . | probably damaging (0.999) | deleterious (0)    | ENSP00000345694.5:p.Arg651Cys |
| CAS-G | DM4 | 7;103290772;G;A | 0.31  | missense variant | RELN    | . | probably damaging (0.999) | deleterious (0)    | ENSP00000345694.5:p.Arg651Cys |
| CAS-G | DM5 | 7;103290772;G;A | 0.42  | missense variant | RELN    | . | probably damaging (0.999) | deleterious (0)    | ENSP00000345694.5:p.Arg651Cys |
| CAS-G | DM6 | 7;103290772;G;A | 0.38  | missense variant | RELN    | . | probably damaging (0.999) | deleterious (0)    | ENSP00000345694.5:p.Arg651Cys |
| CAS-G | P   | 7;103290772;G;A | 0.08  | missense variant | RELN    | . | probably damaging (0.999) | deleterious (0)    | ENSP00000345694.5:p.Arg651Cys |
| CAS-G | P   | 7;103290772;G;A | 0.005 | missense variant | RELN    | . | probably damaging (0.999) | deleterious (0)    | ENSP00000345694.5:p.Arg651Cys |
| CAS-G | DM6 | 16;82034421;C;T | 0.23  | missense variant | SDR42E1 | . | probably damaging (1)     | deleterious (0)    | ENSP00000332407.4:p.Gly15Arg  |
| CAS-G | P   | 16;82034421;C;T | 0.11  | missense variant | SDR42E1 | . | probably damaging (1)     | deleterious (0)    | ENSP00000332407.4:p.Gly15Arg  |
| CAS-G | DM1 | 19;37005354;G;C | 0.20  | missense variant | ZNF260  | . | probably damaging (0.998) | deleterious (0)    | ENSP00000465834.1:p.Leu263Val |
| CAS-G | DM2 | 19;37005354;G;C | 0.25  | missense variant | ZNF260  | . | probably damaging (0.998) | deleterious (0)    | ENSP00000465834.1:p.Leu263Val |
| CAS-G | DM3 | 19;37005354;G;C | 0.16  | missense variant | ZNF260  | . | probably damaging (0.998) | deleterious (0)    | ENSP00000465834.1:p.Leu263Val |
| CAS-G | DM4 | 19;37005354;G;C | 0.26  | missense variant | ZNF260  | . | probably damaging (0.998) | deleterious (0)    | ENSP00000465834.1:p.Leu263Val |
| CAS-G | DM5 | 19;37005354;G;C | 0.21  | missense variant | ZNF260  | . | probably damaging (0.998) | deleterious (0)    | ENSP00000465834.1:p.Leu263Val |

|       |     |                 |      |                  |         |   |                           |                    |                                |
|-------|-----|-----------------|------|------------------|---------|---|---------------------------|--------------------|--------------------------------|
| CAS-G | DM6 | 19;37005354;G;C | 0.16 | missense variant | ZNF260  | . | probably damaging (0.998) | deleterious (0)    | ENSP00000465834.1:p.Leu263Val  |
| CAS-D | DM1 | 17;35518730;G;A | 1.00 | missense variant | ACACA   | . | benign (0.155)            | deleterious (0.04) | ENSP00000377928.2:p.His1735Tyr |
| CAS-D | DM2 | 17;35518730;G;A | 1.00 | missense variant | ACACA   | . | benign (0.155)            | deleterious (0.04) | ENSP00000377928.2:p.His1735Tyr |
| CAS-D | DM3 | 17;35518730;G;A | 1.00 | missense variant | ACACA   | . | benign (0.155)            | deleterious (0.04) | ENSP00000377928.2:p.His1735Tyr |
| CAS-D | DM4 | 17;35518730;G;A | 1.00 | missense variant | ACACA   | . | benign (0.155)            | deleterious (0.04) | ENSP00000377928.2:p.His1735Tyr |
| CAS-D | DM5 | 17;35518730;G;A | 0.91 | missense variant | ACACA   | . | benign (0.155)            | deleterious (0.04) | ENSP00000377928.2:p.His1735Tyr |
| CAS-D | DM6 | 17;35518730;G;A | 1.00 | missense variant | ACACA   | . | benign (0.155)            | deleterious (0.04) | ENSP00000377928.2:p.His1735Tyr |
| CAS-D | P1  | 17;35518730;G;A | 0.60 | missense variant | ACACA   | . | benign (0.155)            | deleterious (0.04) | ENSP00000377928.2:p.His1735Tyr |
| CAS-D | P2  | 17;35518730;G;A | 1.00 | missense variant | ACACA   | . | benign (0.155)            | deleterious (0.04) | ENSP00000377928.2:p.His1735Tyr |
| CAS-D | P3  | 17;35518730;G;A | 0.67 | missense variant | ACACA   | . | benign (0.155)            | deleterious (0.04) | ENSP00000377928.2:p.His1735Tyr |
| CAS-D | RM  | 17;35518730;G;A | 1.00 | missense variant | ACACA   | . | benign (0.155)            | deleterious (0.04) | ENSP00000377928.2:p.His1735Tyr |
| CAS-D | DM1 | 2;27805006;C;T  | 1.00 | missense variant | C2orf16 | . | unknown (0)               | deleterious (0.03) | ENSP00000386190.2:p.Pro1856Leu |
| CAS-D | DM2 | 2;27805006;C;T  | 1.00 | missense variant | C2orf16 | . | unknown (0)               | deleterious (0.03) | ENSP00000386190.2:p.Pro1856Leu |
| CAS-D | DM3 | 2;27805006;C;T  | 1.00 | missense variant | C2orf16 | . | unknown (0)               | deleterious (0.03) | ENSP00000386190.2:p.Pro1856Leu |
| CAS-D | DM4 | 2;27805006;C;T  | 0.92 | missense variant | C2orf16 | . | unknown (0)               | deleterious (0.03) | ENSP00000386190.2:p.Pro1856Leu |
| CAS-D | DM5 | 2;27805006;C;T  | 0.93 | missense variant | C2orf16 | . | unknown (0)               | deleterious (0.03) | ENSP00000386190.2:p.Pro1856Leu |
| CAS-D | DM6 | 2;27805006;C;T  | 1.00 | missense variant | C2orf16 | . | unknown (0)               | deleterious (0.03) | ENSP00000386190.2:p.Pro1856Leu |
| CAS-D | P1  | 2;27805006;C;T  | 0.78 | missense variant | C2orf16 | . | unknown (0)               | deleterious (0.03) | ENSP00000386190.2:p.Pro1856Leu |
| CAS-D | P2  | 2;27805006;C;T  | 1.00 | missense variant | C2orf16 | . | unknown (0)               | deleterious (0.03) | ENSP00000386190.2:p.Pro1856Leu |
| CAS-D | P3  | 2;27805006;C;T  | 0.78 | missense variant | C2orf16 | . | unknown (0)               | deleterious (0.03) | ENSP00000386190.2:p.Pro1856Leu |
| CAS-D | RM  | 2;27805006;C;T  | 1.00 | missense variant | C2orf16 | . | unknown (0)               | deleterious (0.03) | ENSP00000386190.2:p.Pro1856Leu |
| CAS-D | DM1 | 3;121994763;G;T | 0.94 | missense variant | CASR    | . | probably damaging (1)     | deleterious (0)    | ENSP00000418685.1:p.Trp494Cys  |
| CAS-D | DM2 | 3;121994763;G;T | 0.98 | missense variant | CASR    | . | probably damaging (1)     | deleterious (0)    | ENSP00000418685.1:p.Trp494Cys  |
| CAS-D | DM3 | 3;121994763;G;T | 0.94 | missense variant | CASR    | . | probably damaging (1)     | deleterious (0)    | ENSP00000418685.1:p.Trp494Cys  |
| CAS-D | DM4 | 3;121994763;G;T | 1.00 | missense variant | CASR    | . | probably damaging (1)     | deleterious (0)    | ENSP00000418685.1:p.Trp494Cys  |
| CAS-D | DM5 | 3;121994763;G;T | 0.88 | missense variant | CASR    | . | probably damaging (1)     | deleterious (0)    | ENSP00000418685.1:p.Trp494Cys  |
| CAS-D | DM6 | 3;121994763;G;T | 1.00 | missense variant | CASR    | . | probably damaging (1)     | deleterious (0)    | ENSP00000418685.1:p.Trp494Cys  |
| CAS-D | P1  | 3;121994763;G;T | 0.44 | missense variant | CASR    | . | probably damaging (1)     | deleterious (0)    | ENSP00000418685.1:p.Trp494Cys  |

|       |     |                 |      |                  |        |   |                           |                    |                               |
|-------|-----|-----------------|------|------------------|--------|---|---------------------------|--------------------|-------------------------------|
| CAS-D | P2  | 3;121994763;G;T | 0.67 | missense variant | CASR   | . | probably damaging (1)     | deleterious (0)    | ENSP00000418685.1:p.Trp494Cys |
| CAS-D | P3  | 3;121994763;G;T | 0.22 | missense variant | CASR   | . | probably damaging (1)     | deleterious (0)    | ENSP00000418685.1:p.Trp494Cys |
| CAS-D | RM  | 3;121994763;G;T | 0.78 | missense variant | CASR   | . | probably damaging (1)     | deleterious (0)    | ENSP00000418685.1:p.Trp494Cys |
| CAS-D | DM1 | 8;642583;G;C    | 1.00 | missense variant | ERICH1 | . | benign (0.437)            | deleterious (0.01) | ENSP00000262109.7:p.Arg67Gly  |
| CAS-D | DM2 | 8;642583;G;C    | 0.79 | missense variant | ERICH1 | . | benign (0.437)            | deleterious (0.01) | ENSP00000262109.7:p.Arg67Gly  |
| CAS-D | DM3 | 8;642583;G;C    | 1.00 | missense variant | ERICH1 | . | benign (0.437)            | deleterious (0.01) | ENSP00000262109.7:p.Arg67Gly  |
| CAS-D | DM4 | 8;642583;G;C    | 1.00 | missense variant | ERICH1 | . | benign (0.437)            | deleterious (0.01) | ENSP00000262109.7:p.Arg67Gly  |
| CAS-D | DM5 | 8;642583;G;C    | 0.70 | missense variant | ERICH1 | . | benign (0.437)            | deleterious (0.01) | ENSP00000262109.7:p.Arg67Gly  |
| CAS-D | DM6 | 8;642583;G;C    | 1.00 | missense variant | ERICH1 | . | benign (0.437)            | deleterious (0.01) | ENSP00000262109.7:p.Arg67Gly  |
| CAS-D | P1  | 8;642583;G;C    | 0.50 | missense variant | ERICH1 | . | benign (0.437)            | deleterious (0.01) | ENSP00000262109.7:p.Arg67Gly  |
| CAS-D | P2  | 8;642583;G;C    | 0.84 | missense variant | ERICH1 | . | benign (0.437)            | deleterious (0.01) | ENSP00000262109.7:p.Arg67Gly  |
| CAS-D | P3  | 8;642583;G;C    | 0.35 | missense variant | ERICH1 | . | benign (0.437)            | deleterious (0.01) | ENSP00000262109.7:p.Arg67Gly  |
| CAS-D | RM  | 8;642583;G;C    | 0.89 | missense variant | ERICH1 | . | benign (0.437)            | deleterious (0.01) | ENSP00000262109.7:p.Arg67Gly  |
| CAS-D | DM1 | 3;120360531;G;A | 0.79 | missense variant | HGD    | . | probably damaging (0.974) | deleterious (0)    | ENSP00000283871.5:p.Pro262Ser |
| CAS-D | DM2 | 3;120360531;G;A | 1.00 | missense variant | HGD    | . | probably damaging (0.974) | deleterious (0)    | ENSP00000283871.5:p.Pro262Ser |
| CAS-D | DM3 | 3;120360531;G;A | 1.00 | missense variant | HGD    | . | probably damaging (0.974) | deleterious (0)    | ENSP00000283871.5:p.Pro262Ser |
| CAS-D | DM4 | 3;120360531;G;A | 1.00 | missense variant | HGD    | . | probably damaging (0.974) | deleterious (0)    | ENSP00000283871.5:p.Pro262Ser |
| CAS-D | DM5 | 3;120360531;G;A | 1.00 | missense variant | HGD    | . | probably damaging (0.974) | deleterious (0)    | ENSP00000283871.5:p.Pro262Ser |
| CAS-D | DM6 | 3;120360531;G;A | 0.98 | missense variant | HGD    | . | probably damaging (0.974) | deleterious (0)    | ENSP00000283871.5:p.Pro262Ser |
| CAS-D | P1  | 3;120360531;G;A | 0.38 | missense variant | HGD    | . | probably damaging (0.974) | deleterious (0)    | ENSP00000283871.5:p.Pro262Ser |
| CAS-D | P2  | 3;120360531;G;A | 0.49 | missense variant | HGD    | . | probably damaging (0.974) | deleterious (0)    | ENSP00000283871.5:p.Pro262Ser |
| CAS-D | P3  | 3;120360531;G;A | 0.34 | missense variant | HGD    | . | probably damaging (0.974) | deleterious (0)    | ENSP00000283871.5:p.Pro262Ser |
| CAS-D | RM  | 3;120360531;G;A | 0.89 | missense variant | HGD    | . | probably damaging (0.974) | deleterious (0)    | ENSP00000283871.5:p.Pro262Ser |
| CAS-D | DM1 | X;3242180;G;A   | 0.99 | missense variant | MXRA5  | . | probably damaging (1)     | deleterious (0.01) | ENSP00000217939.5:p.Pro516Ser |
| CAS-D | DM2 | X;3242180;G;A   | 1.00 | missense variant | MXRA5  | . | probably damaging (1)     | deleterious (0.01) | ENSP00000217939.5:p.Pro516Ser |
| CAS-D | DM3 | X;3242180;G;A   | 0.99 | missense variant | MXRA5  | . | probably damaging (1)     | deleterious (0.01) | ENSP00000217939.5:p.Pro516Ser |
| CAS-D | DM4 | X;3242180;G;A   | 0.95 | missense variant | MXRA5  | . | probably damaging (1)     | deleterious (0.01) | ENSP00000217939.5:p.Pro516Ser |
| CAS-D | DM5 | X;3242180;G;A   | 0.88 | missense variant | MXRA5  | . | probably damaging (1)     | deleterious (0.01) | ENSP00000217939.5:p.Pro516Ser |

|       |     |                 |      |                  |         |   |                           |                    |                               |
|-------|-----|-----------------|------|------------------|---------|---|---------------------------|--------------------|-------------------------------|
| CAS-D | DM6 | X;3242180;G;A   | 1.00 | missense variant | MXRA5   | . | probably damaging (1)     | deleterious (0.01) | ENSP00000217939.5:p.Pro516Ser |
| CAS-D | P1  | X;3242180;G;A   | 0.76 | missense variant | MXRA5   | . | probably damaging (1)     | deleterious (0.01) | ENSP00000217939.5:p.Pro516Ser |
| CAS-D | P2  | X;3242180;G;A   | 0.96 | missense variant | MXRA5   | . | probably damaging (1)     | deleterious (0.01) | ENSP00000217939.5:p.Pro516Ser |
| CAS-D | P3  | X;3242180;G;A   | 0.74 | missense variant | MXRA5   | . | probably damaging (1)     | deleterious (0.01) | ENSP00000217939.5:p.Pro516Ser |
| CAS-D | RM  | X;3242180;G;A   | 1.00 | missense variant | MXRA5   | . | probably damaging (1)     | deleterious (0.01) | ENSP00000217939.5:p.Pro516Ser |
| CAS-D | DM1 | 1;204197277;C;T | 1.00 | missense variant | PLEKHA6 | . | probably damaging (0.998) | deleterious (0.01) | ENSP00000272203.2:p.Glu989Lys |
| CAS-D | DM2 | 1;204197277;C;T | 0.66 | missense variant | PLEKHA6 | . | probably damaging (0.998) | deleterious (0.01) | ENSP00000272203.2:p.Glu989Lys |
| CAS-D | DM3 | 1;204197277;C;T | 0.91 | missense variant | PLEKHA6 | . | probably damaging (0.998) | deleterious (0.01) | ENSP00000272203.2:p.Glu989Lys |
| CAS-D | DM4 | 1;204197277;C;T | 0.50 | missense variant | PLEKHA6 | . | probably damaging (0.998) | deleterious (0.01) | ENSP00000272203.2:p.Glu989Lys |
| CAS-D | DM5 | 1;204197277;C;T | 1.00 | missense variant | PLEKHA6 | . | probably damaging (0.998) | deleterious (0.01) | ENSP00000272203.2:p.Glu989Lys |
| CAS-D | DM6 | 1;204197277;C;T | 0.95 | missense variant | PLEKHA6 | . | probably damaging (0.998) | deleterious (0.01) | ENSP00000272203.2:p.Glu989Lys |
| CAS-D | P1  | 1;204197277;C;T | 0.35 | missense variant | PLEKHA6 | . | probably damaging (0.998) | deleterious (0.01) | ENSP00000272203.2:p.Glu989Lys |
| CAS-D | P2  | 1;204197277;C;T | 0.50 | missense variant | PLEKHA6 | . | probably damaging (0.998) | deleterious (0.01) | ENSP00000272203.2:p.Glu989Lys |
| CAS-D | P3  | 1;204197277;C;T | 0.38 | missense variant | PLEKHA6 | . | probably damaging (0.998) | deleterious (0.01) | ENSP00000272203.2:p.Glu989Lys |
| CAS-D | RM  | 1;204197277;C;T | 0.81 | missense variant | PLEKHA6 | . | probably damaging (0.998) | deleterious (0.01) | ENSP00000272203.2:p.Glu989Lys |
| CAS-D | DM1 | 8;18729361;G;A  | 0.74 | missense variant | PSD3    | . | benign (0.014)            | tolerated (0.09)   | ENSP00000401704.2:p.Ser338Phe |
| CAS-D | DM2 | 8;18729361;G;A  | 1.00 | missense variant | PSD3    | . | benign (0.014)            | tolerated (0.09)   | ENSP00000401704.2:p.Ser338Phe |
| CAS-D | DM3 | 8;18729361;G;A  | 1.00 | missense variant | PSD3    | . | benign (0.014)            | tolerated (0.09)   | ENSP00000401704.2:p.Ser338Phe |
| CAS-D | DM4 | 8;18729361;G;A  | 0.98 | missense variant | PSD3    | . | benign (0.014)            | tolerated (0.09)   | ENSP00000401704.2:p.Ser338Phe |
| CAS-D | DM5 | 8;18729361;G;A  | 0.96 | missense variant | PSD3    | . | benign (0.014)            | tolerated (0.09)   | ENSP00000401704.2:p.Ser338Phe |
| CAS-D | DM6 | 8;18729361;G;A  | 1.00 | missense variant | PSD3    | . | benign (0.014)            | tolerated (0.09)   | ENSP00000401704.2:p.Ser338Phe |
| CAS-D | P1  | 8;18729361;G;A  | 0.50 | missense variant | PSD3    | . | benign (0.014)            | tolerated (0.09)   | ENSP00000401704.2:p.Ser338Phe |
| CAS-D | P2  | 8;18729361;G;A  | 1.00 | missense variant | PSD3    | . | benign (0.014)            | tolerated (0.09)   | ENSP00000401704.2:p.Ser338Phe |
| CAS-D | P3  | 8;18729361;G;A  | 0.47 | missense variant | PSD3    | . | benign (0.014)            | tolerated (0.09)   | ENSP00000401704.2:p.Ser338Phe |
| CAS-D | RM  | 8;18729361;G;A  | 1.00 | missense variant | PSD3    | . | benign (0.014)            | tolerated (0.09)   | ENSP00000401704.2:p.Ser338Phe |
| CAS-D | DM1 | 16;82034421;C;T | 0.44 | missense variant | SDR42E1 | . | probably damaging (1)     | deleterious (0)    | ENSP00000332407.4:p.Gly15Arg  |
| CAS-D | DM2 | 16;82034421;C;T | 0.50 | missense variant | SDR42E1 | . | probably damaging (1)     | deleterious (0)    | ENSP00000332407.4:p.Gly15Arg  |
| CAS-D | DM3 | 16;82034421;C;T | 1.00 | missense variant | SDR42E1 | . | probably damaging (1)     | deleterious (0)    | ENSP00000332407.4:p.Gly15Arg  |

|       |     |                 |      |                  |         |   |                       |                  |                               |
|-------|-----|-----------------|------|------------------|---------|---|-----------------------|------------------|-------------------------------|
| CAS-D | DM4 | 16;82034421;C;T | 0.41 | missense variant | SDR42E1 | . | probably damaging (1) | deleterious (0)  | ENSP00000332407.4:p.Gly15Arg  |
| CAS-D | DM5 | 16;82034421;C;T | 0.51 | missense variant | SDR42E1 | . | probably damaging (1) | deleterious (0)  | ENSP00000332407.4:p.Gly15Arg  |
| CAS-D | DM6 | 16;82034421;C;T | 0.67 | missense variant | SDR42E1 | . | probably damaging (1) | deleterious (0)  | ENSP00000332407.4:p.Gly15Arg  |
| CAS-D | P1  | 16;82034421;C;T | 0.20 | missense variant | SDR42E1 | . | probably damaging (1) | deleterious (0)  | ENSP00000332407.4:p.Gly15Arg  |
| CAS-D | P2  | 16;82034421;C;T | 0.42 | missense variant | SDR42E1 | . | probably damaging (1) | deleterious (0)  | ENSP00000332407.4:p.Gly15Arg  |
| CAS-D | P3  | 16;82034421;C;T | 0.22 | missense variant | SDR42E1 | . | probably damaging (1) | deleterious (0)  | ENSP00000332407.4:p.Gly15Arg  |
| CAS-D | RM  | 16;82034421;C;T | 0.39 | missense variant | SDR42E1 | . | probably damaging (1) | deleterious (0)  | ENSP00000332407.4:p.Gly15Arg  |
| CAS-D | DM1 | 5;121759212;C;G | 0.91 | missense variant | SNCAIP  | . | benign (0.012)        | tolerated (0.07) | ENSP00000261367.7:p.Asn307Lys |
| CAS-D | DM1 | 5;121759229;C;T | 0.90 | missense variant | SNCAIP  | . | benign (0.018)        | deleterious (0)  | ENSP00000261367.7:p.Pro313Leu |
| CAS-D | DM2 | 5;121759229;C;T | 1.00 | missense variant | SNCAIP  | . | benign (0.018)        | deleterious (0)  | ENSP00000261367.7:p.Pro313Leu |
| CAS-D | DM2 | 5;121759212;C;G | 1.00 | missense variant | SNCAIP  | . | benign (0.012)        | tolerated (0.07) | ENSP00000261367.7:p.Asn307Lys |
| CAS-D | DM3 | 5;121759212;C;G | 1.00 | missense variant | SNCAIP  | . | benign (0.012)        | tolerated (0.07) | ENSP00000261367.7:p.Asn307Lys |
| CAS-D | DM3 | 5;121759229;C;T | 1.00 | missense variant | SNCAIP  | . | benign (0.018)        | deleterious (0)  | ENSP00000261367.7:p.Pro313Leu |
| CAS-D | DM4 | 5;121759229;C;T | 1.00 | missense variant | SNCAIP  | . | benign (0.018)        | deleterious (0)  | ENSP00000261367.7:p.Pro313Leu |
| CAS-D | DM4 | 5;121759212;C;G | 1.00 | missense variant | SNCAIP  | . | benign (0.012)        | tolerated (0.07) | ENSP00000261367.7:p.Asn307Lys |
| CAS-D | DM5 | 5;121759229;C;T | 0.97 | missense variant | SNCAIP  | . | benign (0.018)        | deleterious (0)  | ENSP00000261367.7:p.Pro313Leu |
| CAS-D | DM5 | 5;121759212;C;G | 0.97 | missense variant | SNCAIP  | . | benign (0.012)        | tolerated (0.07) | ENSP00000261367.7:p.Asn307Lys |
| CAS-D | DM6 | 5;121759229;C;T | 0.90 | missense variant | SNCAIP  | . | benign (0.018)        | deleterious (0)  | ENSP00000261367.7:p.Pro313Leu |
| CAS-D | DM6 | 5;121759212;C;G | 0.89 | missense variant | SNCAIP  | . | benign (0.012)        | tolerated (0.07) | ENSP00000261367.7:p.Asn307Lys |
| CAS-D | P1  | 5;121759229;C;T | 0.36 | missense variant | SNCAIP  | . | benign (0.018)        | deleterious (0)  | ENSP00000261367.7:p.Pro313Leu |
| CAS-D | P1  | 5;121759212;C;G | 0.30 | missense variant | SNCAIP  | . | benign (0.012)        | tolerated (0.07) | ENSP00000261367.7:p.Asn307Lys |
| CAS-D | P2  | 5;121759212;C;G | 0.50 | missense variant | SNCAIP  | . | benign (0.012)        | tolerated (0.07) | ENSP00000261367.7:p.Asn307Lys |
| CAS-D | P2  | 5;121759229;C;T | 0.49 | missense variant | SNCAIP  | . | benign (0.018)        | deleterious (0)  | ENSP00000261367.7:p.Pro313Leu |
| CAS-D | P3  | 5;121759229;C;T | 0.35 | missense variant | SNCAIP  | . | benign (0.018)        | deleterious (0)  | ENSP00000261367.7:p.Pro313Leu |
| CAS-D | P3  | 5;121759212;C;G | 0.28 | missense variant | SNCAIP  | . | benign (0.012)        | tolerated (0.07) | ENSP00000261367.7:p.Asn307Lys |
| CAS-D | RM  | 5;121759229;C;T | 0.93 | missense variant | SNCAIP  | . | benign (0.018)        | deleterious (0)  | ENSP00000261367.7:p.Pro313Leu |
| CAS-D | RM  | 5;121759212;C;G | 0.73 | missense variant | SNCAIP  | . | benign (0.012)        | tolerated (0.07) | ENSP00000261367.7:p.Asn307Lys |
| CAS-D | DM1 | 3;113176065;A;T | 0.91 | missense variant | SPICE1  | . | benign (0.034)        | tolerated (1)    | ENSP00000295872.4:p.Phe525Leu |

|       |     |                 |      |                  |          |   |                |                  |                               |
|-------|-----|-----------------|------|------------------|----------|---|----------------|------------------|-------------------------------|
| CAS-D | DM2 | 3;113176065;A;T | 1.00 | missense variant | SPICE1   | . | benign (0.034) | tolerated (1)    | ENSP00000295872.4:p.Phe525Leu |
| CAS-D | DM3 | 3;113176065;A;T | 1.00 | missense variant | SPICE1   | . | benign (0.034) | tolerated (1)    | ENSP00000295872.4:p.Phe525Leu |
| CAS-D | DM4 | 3;113176065;A;T | 1.00 | missense variant | SPICE1   | . | benign (0.034) | tolerated (1)    | ENSP00000295872.4:p.Phe525Leu |
| CAS-D | DM5 | 3;113176065;A;T | 1.00 | missense variant | SPICE1   | . | benign (0.034) | tolerated (1)    | ENSP00000295872.4:p.Phe525Leu |
| CAS-D | DM6 | 3;113176065;A;T | 1.00 | missense variant | SPICE1   | . | benign (0.034) | tolerated (1)    | ENSP00000295872.4:p.Phe525Leu |
| CAS-D | P1  | 3;113176065;A;T | 0.35 | missense variant | SPICE1   | . | benign (0.034) | tolerated (1)    | ENSP00000295872.4:p.Phe525Leu |
| CAS-D | P2  | 3;113176065;A;T | 0.66 | missense variant | SPICE1   | . | benign (0.034) | tolerated (1)    | ENSP00000295872.4:p.Phe525Leu |
| CAS-D | P3  | 3;113176065;A;T | 0.33 | missense variant | SPICE1   | . | benign (0.034) | tolerated (1)    | ENSP00000295872.4:p.Phe525Leu |
| CAS-D | RM  | 3;113176065;A;T | 1.00 | missense variant | SPICE1   | . | benign (0.034) | tolerated (1)    | ENSP00000295872.4:p.Phe525Leu |
| CAS-C | DM6 | 17;27893804;C;T | 0.21 | missense variant | ABHD15   | . | benign (0.007) | tolerated (0.47) | ENSP00000302657.3:p.Asp61Asn  |
| CAS-C | DM1 | 16;77401383;G;A | 0.50 | missense variant | ADAMTS18 | . | benign (0.01)  | tolerated (0.52) | ENSP00000392540.2:p.His245Tyr |
| CAS-C | DM2 | 16;77401383;G;A | 0.50 | missense variant | ADAMTS18 | . | benign (0.01)  | tolerated (0.52) | ENSP00000392540.2:p.His245Tyr |
| CAS-C | DM3 | 16;77401383;G;A | 0.47 | missense variant | ADAMTS18 | . | benign (0.01)  | tolerated (0.52) | ENSP00000392540.2:p.His245Tyr |
| CAS-C | DM4 | 16;77401383;G;A | 0.42 | missense variant | ADAMTS18 | . | benign (0.01)  | tolerated (0.52) | ENSP00000392540.2:p.His245Tyr |
| CAS-C | DM5 | 16;77401383;G;A | 0.38 | missense variant | ADAMTS18 | . | benign (0.01)  | tolerated (0.52) | ENSP00000392540.2:p.His245Tyr |
| CAS-C | DM6 | 16;77401383;G;A | 0.67 | missense variant | ADAMTS18 | . | benign (0.01)  | tolerated (0.52) | ENSP00000392540.2:p.His245Tyr |
| CAS-C | P   | 16;77401383;G;A | 0.32 | missense variant | ADAMTS18 | . | benign (0.01)  | tolerated (0.52) | ENSP00000392540.2:p.His245Tyr |
| CAS-C | DM1 | 11;10825714;C;A | 0.50 | stop gained      | EIF4G2   | . | .              | .                | ENSP00000435523.1:p.Glu174Ter |
| CAS-C | DM2 | 11;10825714;C;A | 0.50 | stop gained      | EIF4G2   | . | .              | .                | ENSP00000435523.1:p.Glu174Ter |
| CAS-C | DM3 | 11;10825714;C;A | 0.50 | stop gained      | EIF4G2   | . | .              | .                | ENSP00000435523.1:p.Glu174Ter |
| CAS-C | DM4 | 11;10825714;C;A | 0.50 | stop gained      | EIF4G2   | . | .              | .                | ENSP00000435523.1:p.Glu174Ter |
| CAS-C | DM5 | 11;10825714;C;A | 0.40 | stop gained      | EIF4G2   | . | .              | .                | ENSP00000435523.1:p.Glu174Ter |
| CAS-C | DM6 | 11;10825714;C;A | 0.67 | stop gained      | EIF4G2   | . | .              | .                | ENSP00000435523.1:p.Glu174Ter |
| CAS-C | P   | 11;10825714;C;A | 0.50 | stop gained      | EIF4G2   | . | .              | .                | ENSP00000435523.1:p.Glu174Ter |
| CAS-C | DM1 | 15;72642972;G;T | 0.44 | missense variant | HEXA     | . | benign (0.033) | tolerated (0.22) | ENSP00000457125.1:p.Thr231Asn |
| CAS-C | DM2 | 15;72642972;G;T | 0.50 | missense variant | HEXA     | . | benign (0.033) | tolerated (0.22) | ENSP00000457125.1:p.Thr231Asn |
| CAS-C | DM3 | 15;72642972;G;T | 0.41 | missense variant | HEXA     | . | benign (0.033) | tolerated (0.22) | ENSP00000457125.1:p.Thr231Asn |
| CAS-C | DM4 | 15;72642972;G;T | 0.50 | missense variant | HEXA     | . | benign (0.033) | tolerated (0.22) | ENSP00000457125.1:p.Thr231Asn |

|       |     |                  |      |                  |          |   |                           |                  |                               |
|-------|-----|------------------|------|------------------|----------|---|---------------------------|------------------|-------------------------------|
| CAS-C | DM5 | 15;72642972;G;T  | 0.50 | missense variant | HEXA     | . | benign (0.033)            | tolerated (0.22) | ENSP00000457125.1:p.Thr231Asn |
| CAS-C | DM6 | 15;72642972;G;T  | 0.67 | missense variant | HEXA     | . | benign (0.033)            | tolerated (0.22) | ENSP00000457125.1:p.Thr231Asn |
| CAS-C | P   | 15;72642972;G;T  | 0.50 | missense variant | HEXA     | . | benign (0.033)            | tolerated (0.22) | ENSP00000457125.1:p.Thr231Asn |
| CAS-C | DM1 | 14;77945023;G;A  | 0.39 | missense variant | ISM2     | . | probably damaging (0.96)  | tolerated (0.05) | ENSP00000341490.4:p.Pro337Ser |
| CAS-C | DM2 | 14;77945023;G;A  | 0.48 | missense variant | ISM2     | . | probably damaging (0.96)  | tolerated (0.05) | ENSP00000341490.4:p.Pro337Ser |
| CAS-C | DM3 | 14;77945023;G;A  | 0.41 | missense variant | ISM2     | . | probably damaging (0.96)  | tolerated (0.05) | ENSP00000341490.4:p.Pro337Ser |
| CAS-C | DM4 | 14;77945023;G;A  | 0.36 | missense variant | ISM2     | . | probably damaging (0.96)  | tolerated (0.05) | ENSP00000341490.4:p.Pro337Ser |
| CAS-C | DM5 | 14;77945023;G;A  | 0.50 | missense variant | ISM2     | . | probably damaging (0.96)  | tolerated (0.05) | ENSP00000341490.4:p.Pro337Ser |
| CAS-C | DM6 | 14;77945023;G;A  | 0.67 | missense variant | ISM2     | . | probably damaging (0.96)  | tolerated (0.05) | ENSP00000341490.4:p.Pro337Ser |
| CAS-C | P   | 14;77945023;G;A  | 0.23 | missense variant | ISM2     | . | probably damaging (0.96)  | tolerated (0.05) | ENSP00000341490.4:p.Pro337Ser |
| CAS-C | DM1 | 11;128781776;C;A | 0.50 | missense variant | KCNJ5    | . | probably damaging (1)     | deleterious (0)  | ENSP00000433295.1:p.Ser203Tyr |
| CAS-C | DM2 | 11;128781776;C;A | 0.46 | missense variant | KCNJ5    | . | probably damaging (1)     | deleterious (0)  | ENSP00000433295.1:p.Ser203Tyr |
| CAS-C | DM3 | 11;128781776;C;A | 0.39 | missense variant | KCNJ5    | . | probably damaging (1)     | deleterious (0)  | ENSP00000433295.1:p.Ser203Tyr |
| CAS-C | DM4 | 11;128781776;C;A | 0.50 | missense variant | KCNJ5    | . | probably damaging (1)     | deleterious (0)  | ENSP00000433295.1:p.Ser203Tyr |
| CAS-C | DM5 | 11;128781776;C;A | 0.41 | missense variant | KCNJ5    | . | probably damaging (1)     | deleterious (0)  | ENSP00000433295.1:p.Ser203Tyr |
| CAS-C | DM6 | 11;128781776;C;A | 0.67 | missense variant | KCNJ5    | . | probably damaging (1)     | deleterious (0)  | ENSP00000433295.1:p.Ser203Tyr |
| CAS-C | P   | 11;128781776;C;A | 0.37 | missense variant | KCNJ5    | . | probably damaging (1)     | deleterious (0)  | ENSP00000433295.1:p.Ser203Tyr |
| CAS-C | DM1 | 11;101832797;A;G | 0.50 | missense variant | KIAA1377 | . | benign (0.046)            | tolerated (0.28) | ENSP00000263468.8:p.Asn344Ser |
| CAS-C | DM2 | 11;101832797;A;G | 0.42 | missense variant | KIAA1377 | . | benign (0.046)            | tolerated (0.28) | ENSP00000263468.8:p.Asn344Ser |
| CAS-C | DM3 | 11;101832797;A;G | 0.50 | missense variant | KIAA1377 | . | benign (0.046)            | tolerated (0.28) | ENSP00000263468.8:p.Asn344Ser |
| CAS-C | DM4 | 11;101832797;A;G | 0.50 | missense variant | KIAA1377 | . | benign (0.046)            | tolerated (0.28) | ENSP00000263468.8:p.Asn344Ser |
| CAS-C | DM5 | 11;101832797;A;G | 0.50 | missense variant | KIAA1377 | . | benign (0.046)            | tolerated (0.28) | ENSP00000263468.8:p.Asn344Ser |
| CAS-C | DM6 | 11;101832797;A;G | 0.67 | missense variant | KIAA1377 | . | benign (0.046)            | tolerated (0.28) | ENSP00000263468.8:p.Asn344Ser |
| CAS-C | DM1 | 14;50769638;C;T  | 0.49 | missense variant | L2HGDH   | . | probably damaging (0.998) | deleterious (0)  | ENSP00000450494.1:p.Glu80Lys  |
| CAS-C | DM2 | 14;50769638;C;T  | 0.50 | missense variant | L2HGDH   | . | probably damaging (0.998) | deleterious (0)  | ENSP00000450494.1:p.Glu80Lys  |
| CAS-C | DM3 | 14;50769638;C;T  | 0.42 | missense variant | L2HGDH   | . | probably damaging (0.998) | deleterious (0)  | ENSP00000450494.1:p.Glu80Lys  |
| CAS-C | DM4 | 14;50769638;C;T  | 0.40 | missense variant | L2HGDH   | . | probably damaging (0.998) | deleterious (0)  | ENSP00000450494.1:p.Glu80Lys  |
| CAS-C | DM5 | 14;50769638;C;T  | 0.29 | missense variant | L2HGDH   | . | probably damaging (0.998) | deleterious (0)  | ENSP00000450494.1:p.Glu80Lys  |

|       |     |                 |       |                  |          |   |                           |                  |                               |
|-------|-----|-----------------|-------|------------------|----------|---|---------------------------|------------------|-------------------------------|
| CAS-C | DM6 | 14;50769638;C;T | 0.65  | missense variant | L2HGDH   | . | probably damaging (0.998) | deleterious (0)  | ENSP00000450494.1:p.Glu80Lys  |
| CAS-C | P   | 14;50769638;C;T | 0.50  | missense variant | L2HGDH   | . | probably damaging (0.998) | deleterious (0)  | ENSP00000450494.1:p.Glu80Lys  |
| CAS-C | DM6 | 1;52863511;C;T  | 0.20  | missense variant | ORC1     | . | benign (0.004)            | tolerated (0.55) | ENSP00000360623.3:p.Arg83His  |
| CAS-C | DM5 | 1;52863511;C;T  | 0.01  | missense variant | ORC1     | . | benign (0.004)            | tolerated (0.55) | ENSP00000360623.3:p.Arg83His  |
| CAS-C | P   | 1;52863511;C;T  | 0.005 | missense variant | ORC1     | . | benign (0.004)            | tolerated (0.55) | ENSP00000360623.3:p.Arg83His  |
| CAS-C | DM1 | 11;62382289;A;C | 0.41  | missense variant | ROM1     | . | benign (0.074)            | tolerated (0.07) | ENSP00000278833.3:p.Lys345Thr |
| CAS-C | DM2 | 11;62382289;A;C | 0.50  | missense variant | ROM1     | . | benign (0.074)            | tolerated (0.07) | ENSP00000278833.3:p.Lys345Thr |
| CAS-C | DM3 | 11;62382289;A;C | 0.50  | missense variant | ROM1     | . | benign (0.074)            | tolerated (0.07) | ENSP00000278833.3:p.Lys345Thr |
| CAS-C | DM4 | 11;62382289;A;C | 0.50  | missense variant | ROM1     | . | benign (0.074)            | tolerated (0.07) | ENSP00000278833.3:p.Lys345Thr |
| CAS-C | DM5 | 11;62382289;A;C | 0.39  | missense variant | ROM1     | . | benign (0.074)            | tolerated (0.07) | ENSP00000278833.3:p.Lys345Thr |
| CAS-C | DM6 | 11;62382289;A;C | 0.67  | missense variant | ROM1     | . | benign (0.074)            | tolerated (0.07) | ENSP00000278833.3:p.Lys345Thr |
| CAS-C | P   | 11;62382289;A;C | 0.50  | missense variant | ROM1     | . | benign (0.074)            | tolerated (0.07) | ENSP00000278833.3:p.Lys345Thr |
| CAS-C | DM1 | 14;95029946;G;A | 0.50  | missense variant | SERPINA4 | . | possibly damaging (0.454) | tolerated (0.34) | ENSP00000450838.1:p.Gly43Ser  |
| CAS-C | DM2 | 14;95029946;G;A | 0.44  | missense variant | SERPINA4 | . | possibly damaging (0.454) | tolerated (0.34) | ENSP00000450838.1:p.Gly43Ser  |
| CAS-C | DM3 | 14;95029946;G;A | 0.50  | missense variant | SERPINA4 | . | possibly damaging (0.454) | tolerated (0.34) | ENSP00000450838.1:p.Gly43Ser  |
| CAS-C | DM4 | 14;95029946;G;A | 0.39  | missense variant | SERPINA4 | . | possibly damaging (0.454) | tolerated (0.34) | ENSP00000450838.1:p.Gly43Ser  |
| CAS-C | DM5 | 14;95029946;G;A | 0.40  | missense variant | SERPINA4 | . | possibly damaging (0.454) | tolerated (0.34) | ENSP00000450838.1:p.Gly43Ser  |
| CAS-C | DM6 | 14;95029946;G;A | 0.64  | missense variant | SERPINA4 | . | possibly damaging (0.454) | tolerated (0.34) | ENSP00000450838.1:p.Gly43Ser  |
| CAS-C | P   | 14;95029946;G;A | 0.39  | missense variant | SERPINA4 | . | possibly damaging (0.454) | tolerated (0.34) | ENSP00000450838.1:p.Gly43Ser  |
| CAS-C | DM1 | 14;94933501;C;T | 0.34  | missense variant | SERPINA9 | . | probably damaging (0.999) | deleterious (0)  | ENSP00000337133.5:p.Glu301Lys |
| CAS-C | DM2 | 14;94933501;C;T | 0.25  | missense variant | SERPINA9 | . | probably damaging (0.999) | deleterious (0)  | ENSP00000337133.5:p.Glu301Lys |
| CAS-C | DM3 | 14;94933501;C;T | 0.50  | missense variant | SERPINA9 | . | probably damaging (0.999) | deleterious (0)  | ENSP00000337133.5:p.Glu301Lys |
| CAS-C | DM4 | 14;94933501;C;T | 0.50  | missense variant | SERPINA9 | . | probably damaging (0.999) | deleterious (0)  | ENSP00000337133.5:p.Glu301Lys |
| CAS-C | DM5 | 14;94933501;C;T | 0.47  | missense variant | SERPINA9 | . | probably damaging (0.999) | deleterious (0)  | ENSP00000337133.5:p.Glu301Lys |
| CAS-C | DM6 | 14;94933501;C;T | 0.67  | missense variant | SERPINA9 | . | probably damaging (0.999) | deleterious (0)  | ENSP00000337133.5:p.Glu301Lys |
| CAS-C | P   | 14;94933501;C;T | 0.50  | missense variant | SERPINA9 | . | probably damaging (0.999) | deleterious (0)  | ENSP00000337133.5:p.Glu301Lys |
| CAS-C | DM1 | 11;65417650;A;T | 0.43  | stop gained      | SIPA1    | . | .                         | .                | ENSP00000436269.1:p.Lys964Ter |
| CAS-C | DM2 | 11;65417650;A;T | 0.48  | stop gained      | SIPA1    | . | .                         | .                | ENSP00000436269.1:p.Lys964Ter |



|       |     |                  |      |                  |          |   |                           |                    |                                |
|-------|-----|------------------|------|------------------|----------|---|---------------------------|--------------------|--------------------------------|
| CAS-C | DM3 | 11;65417650;A;T  | 0.50 | stop gained      | SIPA1    | . | .                         | .                  | ENSP00000436269.1:p.Lys964Ter  |
| CAS-C | DM4 | 11;65417650;A;T  | 0.50 | stop gained      | SIPA1    | . | .                         | .                  | ENSP00000436269.1:p.Lys964Ter  |
| CAS-C | DM5 | 11;65417650;A;T  | 0.50 | stop gained      | SIPA1    | . | .                         | .                  | ENSP00000436269.1:p.Lys964Ter  |
| CAS-C | DM6 | 11;65417650;A;T  | 0.67 | stop gained      | SIPA1    | . | .                         | .                  | ENSP00000436269.1:p.Lys964Ter  |
| CAS-C | P   | 11;65417650;A;T  | 0.47 | stop gained      | SIPA1    | . | .                         | .                  | ENSP00000436269.1:p.Lys964Ter  |
| CAS-C | DM1 | 11;62575106;G;C  | 0.50 | missense variant | STX5     | . | benign (0.003)            | .                  | ENSP00000367129.4:p.Ser314Cys  |
| CAS-C | DM2 | 11;62575106;G;C  | 0.43 | missense variant | STX5     | . | benign (0.003)            | .                  | ENSP00000367129.4:p.Ser314Cys  |
| CAS-C | DM3 | 11;62575106;G;C  | 0.28 | missense variant | STX5     | . | benign (0.003)            | .                  | ENSP00000367129.4:p.Ser314Cys  |
| CAS-C | DM4 | 11;62575106;G;C  | 0.38 | missense variant | STX5     | . | benign (0.003)            | .                  | ENSP00000367129.4:p.Ser314Cys  |
| CAS-C | DM5 | 11;62575106;G;C  | 0.33 | missense variant | STX5     | . | benign (0.003)            | .                  | ENSP00000367129.4:p.Ser314Cys  |
| CAS-C | DM6 | 11;62575106;G;C  | 0.61 | missense variant | STX5     | . | benign (0.003)            | .                  | ENSP00000367129.4:p.Ser314Cys  |
| CAS-C | P   | 11;62575106;G;C  | 0.38 | missense variant | STX5     | . | benign (0.003)            | .                  | ENSP00000367129.4:p.Ser314Cys  |
| CAS-C | DM6 | 11;101353764;T;C | 0.57 | missense variant | TRPC6    | . | benign (0.039)            | tolerated (0.43)   | ENSP00000353687.4:p.Ser421Gly  |
| CAS-C | DM1 | 6;33283340;C;T   | 0.34 | missense variant | ZBTB22   | . | probably damaging (0.999) | deleterious (0.01) | ENSP00000404403.1:p.Gly452Arg  |
| CAS-C | DM2 | 6;33283340;C;T   | 0.33 | missense variant | ZBTB22   | . | probably damaging (0.999) | deleterious (0.01) | ENSP00000404403.1:p.Gly452Arg  |
| CAS-C | DM3 | 6;33283340;C;T   | 0.38 | missense variant | ZBTB22   | . | probably damaging (0.999) | deleterious (0.01) | ENSP00000404403.1:p.Gly452Arg  |
| CAS-C | DM4 | 6;33283340;C;T   | 0.27 | missense variant | ZBTB22   | . | probably damaging (0.999) | deleterious (0.01) | ENSP00000404403.1:p.Gly452Arg  |
| CAS-C | DM5 | 6;33283340;C;T   | 0.25 | missense variant | ZBTB22   | . | probably damaging (0.999) | deleterious (0.01) | ENSP00000404403.1:p.Gly452Arg  |
| CAS-C | DM6 | 6;33283340;C;T   | 0.50 | missense variant | ZBTB22   | . | probably damaging (0.999) | deleterious (0.01) | ENSP00000404403.1:p.Gly452Arg  |
| CAS-C | P   | 6;33283340;C;T   | 0.27 | missense variant | ZBTB22   | . | probably damaging (0.999) | deleterious (0.01) | ENSP00000404403.1:p.Gly452Arg  |
| ETH-E | DM1 | 7;48318608;C;A   | 0.38 | missense variant | ABCA13   | . | benign (0.234)            | deleterious (0)    | ENSP00000411096.1:p.Pro2606His |
| ETH-E | DM2 | 7;48318608;C;A   | 0.25 | missense variant | ABCA13   | . | benign (0.234)            | deleterious (0)    | ENSP00000411096.1:p.Pro2606His |
| ETH-E | DM3 | 7;48318608;C;A   | 0.24 | missense variant | ABCA13   | . | benign (0.234)            | deleterious (0)    | ENSP00000411096.1:p.Pro2606His |
| ETH-E | DM1 | 10;28151532;C;A  | 0.79 | missense variant | ARMC4    | . | possibly damaging (0.58)  | deleterious (0.05) | ENSP00000443208.1:p.Arg569Leu  |
| ETH-E | DM2 | 10;28151532;C;A  | 0.78 | missense variant | ARMC4    | . | possibly damaging (0.58)  | deleterious (0.05) | ENSP00000443208.1:p.Arg569Leu  |
| ETH-E | DM3 | 10;28151532;C;A  | 1.00 | missense variant | ARMC4    | . | possibly damaging (0.58)  | deleterious (0.05) | ENSP00000443208.1:p.Arg569Leu  |
| ETH-E | DM1 | 11;76158048;A;T  | 1.00 | missense variant | C11orf30 | . | possibly damaging (0.758) | deleterious (0.01) | ENSP00000432327.1:p.Lys22Asn   |
| ETH-E | DM2 | 11;76158048;A;T  | 0.99 | missense variant | C11orf30 | . | possibly damaging (0.758) | deleterious (0.01) | ENSP00000432327.1:p.Lys22Asn   |

|       |     |                 |      |                         |          |   |                           |                    |                               |
|-------|-----|-----------------|------|-------------------------|----------|---|---------------------------|--------------------|-------------------------------|
| ETH-E | DM3 | 11;76158048;A;T | 1.00 | missense variant        | C11orf30 | . | possibly damaging (0.758) | deleterious (0.01) | ENSP00000432327.1:p.Lys22Asn  |
| ETH-E | DM1 | 3;40433630;C;T  | 1.00 | missense variant        | ENTPD3   | . | probably damaging (0.995) | tolerated (0.11)   | ENSP00000301825.3:p.Pro53Ser  |
| ETH-E | DM2 | 3;40433630;C;T  | 0.91 | missense variant        | ENTPD3   | . | probably damaging (0.995) | tolerated (0.11)   | ENSP00000301825.3:p.Pro53Ser  |
| ETH-E | DM3 | 3;40433630;C;T  | 0.88 | missense variant        | ENTPD3   | . | probably damaging (0.995) | tolerated (0.11)   | ENSP00000301825.3:p.Pro53Ser  |
| ETH-E | RM  | 3;40433630;C;T  | 0.66 | missense variant        | ENTPD3   | . | probably damaging (0.995) | tolerated (0.11)   | ENSP00000301825.3:p.Pro53Ser  |
| ETH-E | DM1 | 2;14789439;G;A  | 0.67 | splice acceptor variant | FAM84A   | . | .                         | .                  | .                             |
| ETH-E | DM2 | 2;14789439;G;A  | 0.64 | splice acceptor variant | FAM84A   | . | .                         | .                  | .                             |
| ETH-E | DM3 | 2;14789439;G;A  | 0.57 | splice acceptor variant | FAM84A   | . | .                         | .                  | .                             |
| ETH-E | P   | 2;14789439;G;A  | 0.40 | splice acceptor variant | FAM84A   | . | .                         | .                  | .                             |
| ETH-E | RM  | 2;14789439;G;A  | 0.45 | splice acceptor variant | FAM84A   | . | .                         | .                  | .                             |
| ETH-E | DM1 | 16;71220694;C;A | 0.20 | missense variant        | HYDIN    | . | possibly damaging (0.887) | deleterious (0)    | ENSP00000314736.5:p.Lys35Asn  |
| ETH-E | DM2 | 16;71220694;C;A | 0.50 | missense variant        | HYDIN    | . | possibly damaging (0.887) | deleterious (0)    | ENSP00000314736.5:p.Lys35Asn  |
| ETH-E | DM3 | 16;71220694;C;A | 0.28 | missense variant        | HYDIN    | . | possibly damaging (0.887) | deleterious (0)    | ENSP00000314736.5:p.Lys35Asn  |
| ETH-E | DM1 | 22;21348438;G;A | 0.96 | missense variant        | LZTR1    | . | benign (0.308)            | tolerated (0.13)   | ENSP00000374006.3:p.Val480Met |
| ETH-E | DM2 | 22;21348438;G;A | 1.00 | missense variant        | LZTR1    | . | benign (0.308)            | tolerated (0.13)   | ENSP00000374006.3:p.Val480Met |
| ETH-E | DM3 | 22;21348438;G;A | 1.00 | missense variant        | LZTR1    | . | benign (0.308)            | tolerated (0.13)   | ENSP00000374006.3:p.Val480Met |
| ETH-E | P   | 22;21348438;G;A | 0.16 | missense variant        | LZTR1    | . | benign (0.308)            | tolerated (0.13)   | ENSP00000374006.3:p.Val480Met |
| ETH-E | RM  | 22;21348438;G;A | 0.39 | missense variant        | LZTR1    | . | benign (0.308)            | tolerated (0.13)   | ENSP00000374006.3:p.Val480Met |
| ETH-E | DM1 | 5;126783275;A;T | 0.96 | missense variant        | MEGF10   | . | possibly damaging (0.832) | tolerated (0.06)   | ENSP00000423354.2:p.Asn919Tyr |
| ETH-E | DM2 | 5;126783275;A;T | 1.00 | missense variant        | MEGF10   | . | possibly damaging (0.832) | tolerated (0.06)   | ENSP00000423354.2:p.Asn919Tyr |
| ETH-E | DM3 | 5;126783275;A;T | 1.00 | missense variant        | MEGF10   | . | possibly damaging (0.832) | tolerated (0.06)   | ENSP00000423354.2:p.Asn919Tyr |
| ETH-E | P   | 5;126783275;A;T | 0.40 | missense variant        | MEGF10   | . | possibly damaging (0.832) | tolerated (0.06)   | ENSP00000423354.2:p.Asn919Tyr |
| ETH-E | RM  | 5;126783275;A;T | 0.85 | missense variant        | MEGF10   | . | possibly damaging (0.832) | tolerated (0.06)   | ENSP00000423354.2:p.Asn919Tyr |
| ETH-E | DM1 | 16;50745225;G;A | 0.28 | missense variant        | NOD2     | . | possibly damaging (0.901) | tolerated (0.08)   | ENSP00000300589.2:p.Arg468His |
| ETH-E | DM2 | 16;50745225;G;A | 0.48 | missense variant        | NOD2     | . | possibly damaging (0.901) | tolerated (0.08)   | ENSP00000300589.2:p.Arg468His |
| ETH-E | DM3 | 16;50745225;G;A | 0.39 | missense variant        | NOD2     | . | possibly damaging (0.901) | tolerated (0.08)   | ENSP00000300589.2:p.Arg468His |
| ETH-E | DM1 | 8;18729956;C;T  | 1.00 | missense variant        | PSD3     | . | possibly damaging (0.635) | deleterious (0)    | ENSP00000401704.2:p.Ala140Thr |
| ETH-E | DM2 | 8;18729956;C;T  | 1.00 | missense variant        | PSD3     | . | possibly damaging (0.635) | deleterious (0)    | ENSP00000401704.2:p.Ala140Thr |

|       |     |                 |      |                  |        |   |                           |                    |                                |
|-------|-----|-----------------|------|------------------|--------|---|---------------------------|--------------------|--------------------------------|
| ETH-E | DM3 | 8;18729956;C;T  | 1.00 | missense variant | PSD3   | . | possibly damaging (0.635) | deleterious (0)    | ENSP00000401704.2;p.Ala140Thr  |
| ETH-E | P   | 8;18729956;C;T  | 0.44 | missense variant | PSD3   | . | possibly damaging (0.635) | deleterious (0)    | ENSP00000401704.2;p.Ala140Thr  |
| ETH-E | RM  | 8;18729956;C;T  | 0.40 | missense variant | PSD3   | . | possibly damaging (0.635) | deleterious (0)    | ENSP00000401704.2;p.Ala140Thr  |
| ETH-E | DM1 | 8;14022112;C;A  | 1.00 | missense variant | SGCZ   | . | possibly damaging (0.538) | deleterious (0)    | ENSP00000405224.2;p.Gly128Val  |
| ETH-E | DM2 | 8;14022112;C;A  | 0.92 | missense variant | SGCZ   | . | possibly damaging (0.538) | deleterious (0)    | ENSP00000405224.2;p.Gly128Val  |
| ETH-E | DM3 | 8;14022112;C;A  | 0.96 | missense variant | SGCZ   | . | possibly damaging (0.538) | deleterious (0)    | ENSP00000405224.2;p.Gly128Val  |
| ETH-E | P   | 8;14022112;C;A  | 0.02 | missense variant | SGCZ   | . | possibly damaging (0.538) | deleterious (0)    | ENSP00000405224.2;p.Gly128Val  |
| ETH-E | RM  | 8;14022112;C;A  | 0.43 | missense variant | SGCZ   | . | possibly damaging (0.538) | deleterious (0)    | ENSP00000405224.2;p.Gly128Val  |
| ETH-E | DM1 | 11;65414015;C;T | 1.00 | missense variant | SIPA1  | . | probably damaging (1)     | deleterious (0)    | ENSP00000436269.1;p.Arg504Trp  |
| ETH-E | DM2 | 11;65414015;C;T | 1.00 | missense variant | SIPA1  | . | probably damaging (1)     | deleterious (0)    | ENSP00000436269.1;p.Arg504Trp  |
| ETH-E | DM3 | 11;65414015;C;T | 0.86 | missense variant | SIPA1  | . | probably damaging (1)     | deleterious (0)    | ENSP00000436269.1;p.Arg504Trp  |
| ETH-E | P   | 11;65414015;C;T | 0.36 | missense variant | SIPA1  | . | probably damaging (1)     | deleterious (0)    | ENSP00000436269.1;p.Arg504Trp  |
| ETH-E | RM  | 11;65414015;C;T | 0.50 | missense variant | SIPA1  | . | probably damaging (1)     | deleterious (0)    | ENSP00000436269.1;p.Arg504Trp  |
| ETH-E | DM1 | 6;84270606;G;T  | 0.66 | missense variant | SNAP91 | . | possibly damaging (0.824) | tolerated (0.33)   | ENSP00000428215.1;p.Gln835Lys  |
| ETH-E | DM2 | 6;84270606;G;T  | 0.36 | missense variant | SNAP91 | . | possibly damaging (0.824) | tolerated (0.33)   | ENSP00000428215.1;p.Gln835Lys  |
| ETH-E | DM3 | 6;84270606;G;T  | 0.37 | missense variant | SNAP91 | . | possibly damaging (0.824) | tolerated (0.33)   | ENSP00000428215.1;p.Gln835Lys  |
| ETH-E | DM1 | 2;54858731;G;T  | 0.41 | missense variant | SPTBN1 | . | benign (0.34)             | tolerated (0.29)   | ENSP00000349259.4;p.Ala1183Ser |
| ETH-E | DM2 | 2;54858731;G;T  | 0.37 | missense variant | SPTBN1 | . | benign (0.34)             | tolerated (0.29)   | ENSP00000349259.4;p.Ala1183Ser |
| ETH-E | DM3 | 2;54858731;G;T  | 0.38 | missense variant | SPTBN1 | . | benign (0.34)             | tolerated (0.29)   | ENSP00000349259.4;p.Ala1183Ser |
| ETH-E | DM1 | 12;10777303;C;G | 0.67 | missense variant | STYK1  | . | probably damaging (1)     | deleterious (0)    | ENSP00000075503.3;p.Lys291Asn  |
| ETH-E | DM2 | 12;10777303;C;G | 0.67 | missense variant | STYK1  | . | probably damaging (1)     | deleterious (0)    | ENSP00000075503.3;p.Lys291Asn  |
| ETH-E | DM3 | 12;10777303;C;G | 0.65 | missense variant | STYK1  | . | probably damaging (1)     | deleterious (0)    | ENSP00000075503.3;p.Lys291Asn  |
| ETH-E | P   | 12;10777303;C;G | 0.02 | missense variant | STYK1  | . | probably damaging (1)     | deleterious (0)    | ENSP00000075503.3;p.Lys291Asn  |
| ETH-E | RM  | 12;10777303;C;G | 0.42 | missense variant | STYK1  | . | probably damaging (1)     | deleterious (0)    | ENSP00000075503.3;p.Lys291Asn  |
| ETH-E | DM1 | 8;38678116;T;G  | 0.50 | missense variant | TACC1  | . | probably damaging (0.95)  | tolerated (0.38)   | ENSP00000428253.1;p.Leu227Val  |
| ETH-E | DM2 | 8;38678116;T;G  | 0.50 | missense variant | TACC1  | . | probably damaging (0.95)  | tolerated (0.38)   | ENSP00000428253.1;p.Leu227Val  |
| ETH-E | DM3 | 8;38678116;T;G  | 0.50 | missense variant | TACC1  | . | probably damaging (0.95)  | tolerated (0.38)   | ENSP00000428253.1;p.Leu227Val  |
| ETH-E | DM1 | 16;49672325;C;A | 0.50 | missense variant | ZNF423 | . | possibly damaging (0.843) | deleterious (0.01) | ENSP00000457928.1;p.Lys186Asn  |

|       |     |                 |      |                  |         |   |                           |                    |                               |
|-------|-----|-----------------|------|------------------|---------|---|---------------------------|--------------------|-------------------------------|
| ETH-E | DM2 | 16;49672325;C;A | 0.49 | missense variant | ZNF423  | . | possibly damaging (0.843) | deleterious (0.01) | ENSP00000457928.1:p.Lys186Asn |
| ETH-E | DM3 | 16;49672325;C;A | 0.58 | missense variant | ZNF423  | . | possibly damaging (0.843) | deleterious (0.01) | ENSP00000457928.1:p.Lys186Asn |
| ETH-E | DM1 | 2;185802564;G;A | 0.47 | missense variant | ZNF804A | . | probably damaging (0.953) | deleterious (0.01) | ENSP00000303252.6:p.Arg814Gln |
| ETH-E | DM2 | 2;185802564;G;A | 0.65 | missense variant | ZNF804A | . | probably damaging (0.953) | deleterious (0.01) | ENSP00000303252.6:p.Arg814Gln |
| ETH-E | DM3 | 2;185802564;G;A | 0.57 | missense variant | ZNF804A | . | probably damaging (0.953) | deleterious (0.01) | ENSP00000303252.6:p.Arg814Gln |
| ETH-E | P   | 2;185802564;G;A | 0.31 | missense variant | ZNF804A | . | probably damaging (0.953) | deleterious (0.01) | ENSP00000303252.6:p.Arg814Gln |
| ETH-E | RM  | 2;185802564;G;A | 0.34 | missense variant | ZNF804A | . | probably damaging (0.953) | deleterious (0.01) | ENSP00000303252.6:p.Arg814Gln |

**Supplementary Table 12. GO Slim terms associated with mutations gained or increased in allelic dose with increased ploidy in patients CAS-D, CAS-G, CAS-C and ETH-E.**

| GO Slim Annotation                           | Number of Genes | Genes                                                                                                                                                                           |
|----------------------------------------------|-----------------|---------------------------------------------------------------------------------------------------------------------------------------------------------------------------------|
| intracellular                                | 28              | ACACA,C11orf30,DNHD1,EIF4G2,EP400,FRY,GIMAP5,HGD,ISM2,JAKMIP1,KDM3B,LIN28B,MICU3,NOD2,ORC1,PSD3,RELN,SERPINA9,SIPA1,SNAP91,SNCAIP,SPICE1,SPTBN1,STX5,TACC1,ZBTB22,ZNF260,ZNF423 |
| organelle                                    | 25              | ACACA,C11orf30,DNHD1,EP400,FRY,GIMAP5,HYDIN,ISM2,JAKMIP1,KDM3B,LIN28B,MICU3,NOD2,ORC1,PSD3,ROM1,SIPA1,SNCAIP,SPICE1,SPTBN1,STX5,TACC1,ZBTB22,ZNF260,ZNF423                      |
| ion binding                                  | 24              | ABCA13,ACACA,ADAMTS18,DCST1,ENTPD3,EP400,FER1L6,GIMAP5,HGD,KAL1,KDM3B,LIN28B,MICU3,NOD2,ORC1,RELN,SNAP91,SPTBN1,STYK1,TRPC6,ZBTB22,ZNF260,ZNF423,ZNF804A                        |
| cytoplasm                                    | 20              | ACACA,EIF4G2,FRY,GIMAP5,HGD,JAKMIP1,LIN28B,MICU3,NOD2,ORC1,RELN,SERPINA9,SIPA1,SNAP91,SNCAIP,SPICE1,SPTBN1,STX5,TACC1,ZNF260                                                    |
| plasma membrane                              | 18              | CASR,ENTPD3,IL7R,KAL1,KCNJ5,MEGF10,MGAM,NOD2,ORC1,PDCD1,PSD3,ROM1,SGCZ,SNAP91,SNCAIP,SPTBN1,STYK1,TRPC6                                                                         |
| transport                                    | 16              | ABCA13,ACACA,CASR,DNHD1,FER1L6,GIMAP5,JAKMIP1,KCNJ5,MEGF10,NOD2,RELN,SNAP91,SNCAIP,SPTBN1,STX5,TRPC6                                                                            |
| cellular nitrogen compound metabolic process | 15              | ACACA,C11orf30,ENTPD3,GIMAP5,HGD,IL7R,KDM3B,LIN28B,NOD2,ORC1,RELN,SIPA1,ZBTB22,ZNF260,ZNF423                                                                                    |
| nucleus                                      | 15              | C11orf30,EP400,ISM2,KDM3B,LIN28B,NOD2,ORC1,SIPA1,SNCAIP,SPTBN1,STX5,TACC1,ZBTB22,ZNF260,ZNF423                                                                                  |
| biosynthetic process                         | 12              | ACACA,C11orf30,GIMAP5,KDM3B,LIN28B,NOD2,ORC1,RELN,SDR42E1,ZBTB22,ZNF260,ZNF423                                                                                                  |
| signal transduction                          | 11              | ADAMTS18,CASR,IL7R,LILRB5,NOD2,PDCD1,PSD3,RELN,SIPA1,SPTBN1,ZNF423                                                                                                              |
| anatomical structure development             | 11              | CASR,GIMAP5,IL7R,KAL1,MEGF10,PSD3,RELN,SPTBN1,TACC1,TRPC6,ZNF423                                                                                                                |
| protein complex                              | 11              | DNHD1,EP400,FRY,JAKMIP1,KCNJ5,NOD2,ORC1,SGCZ,SNAP91,SPICE1,SPTBN1                                                                                                               |
| cell differentiation                         | 10              | GIMAP5,IL7R,KAL1,MEGF10,PSD3,RELN,SPTBN1,TACC1,TRPC6,ZNF423                                                                                                                     |
| cellular component assembly                  | 8               | ACACA,DNHD1,NOD2,RELN,SNAP91,SNCAIP,SPICE1,SPTBN1                                                                                                                               |
| cytoskeleton                                 | 8               | DNHD1,FRY,JAKMIP1,NOD2,PSD3,SPICE1,SPTBN1,TACC1                                                                                                                                 |
| extracellular region                         | 8               | ABHD15,IL7R,ISM2,KAL1,MXRA5,RELN,SERPINA4,SERPINA9                                                                                                                              |
| DNA binding                                  | 6               | EP400,LIN28B,ORC1,ZBTB22,ZNF260,ZNF423                                                                                                                                          |
| catabolic process                            | 6               | ENTPD3,GIMAP5,HGD,LIN28B,MGAM,SIPA1                                                                                                                                             |
| cytosol                                      | 6               | ACACA,HGD,NOD2,ORC1,SIPA1,SPTBN1                                                                                                                                                |
| locomotion                                   | 6               | DNHD1,KAL1,NOD2,RELN,SPTBN1,TRPC6                                                                                                                                               |
| response to stress                           | 6               | C11orf30,GIMAP5,LILRB5,NOD2,RELN,TRPC6                                                                                                                                          |
| vesicle-mediated transport                   | 6               | DNHD1,MEGF10,NOD2,SNAP91,SPTBN1,STX5                                                                                                                                            |
| cell adhesion                                | 5               | KAL1,MEGF10,RELN,ROM1,SIPA1                                                                                                                                                     |
| cell cycle                                   | 5               | ORC1,SIPA1,SPICE1,SPTBN1,TACC1                                                                                                                                                  |
| cell morphogenesis                           | 5               | IL7R,KAL1,RELN,SPTBN1,TRPC6                                                                                                                                                     |
| cell proliferation                           | 5               | IL7R,MEGF10,NOD2,SIPA1,TACC1                                                                                                                                                    |
| cellular protein modification process        | 5               | EP400,NOD2,RELN,SPTBN1,STYK1                                                                                                                                                    |
| enzyme regulator activity                    | 5               | KAL1,MEGF10,SERPINA4,SERPINA9,SIPA1                                                                                                                                             |
| homeostatic process                          | 5               | ACACA,CASR,GIMAP5,IL7R,TRPC6                                                                                                                                                    |
| macromolecular complex assembly              | 5               | ACACA,NOD2,SNAP91,SPICE1,SPTBN1                                                                                                                                                 |
| protein complex assembly                     | 5               | ACACA,NOD2,SNAP91,SPICE1,SPTBN1                                                                                                                                                 |
| signal transducer activity                   | 4               | CASR,IL7R,LILRB5,PDCD1                                                                                                                                                          |
| small molecule metabolic process             | 5               | ACACA,ENTPD3,HGD,MGAM,SIPA1                                                                                                                                                     |
| transmembrane transport                      | 5               | ACACA,CASR,FER1L6,RELN,TRPC6                                                                                                                                                    |
| cell death                                   | 4               | GIMAP5,NOD2,PDCD1,SNCAIP                                                                                                                                                        |
| cytoskeleton organization                    | 4               | SIPA1,SPICE1,SPTBN1,TACC1                                                                                                                                                       |
| extracellular space                          | 4               | KAL1,RELN,SERPINA4,SERPINA9                                                                                                                                                     |

|                                                  |   |                           |
|--------------------------------------------------|---|---------------------------|
| immune system process                            | 4 | GIMAP5,IL7R,NOD2,PDCD1    |
| lipid metabolic process                          | 4 | ACACA,GIMAP5,NOD2,SDR42E1 |
| membrane organization                            | 4 | GIMAP5,RELN,SNAP91,SPTBN1 |
| mitochondrion                                    | 4 | ACACA,GIMAP5,LIN28B,MICU3 |
| neurological system process                      | 4 | KCNJ5,RELN,ROM1,SNCAIP    |
| oxidoreductase activity                          | 4 | HGD,KDM3B,L2HGDH,SDR42E1  |
| DNA metabolic process                            | 3 | C11orf30,IL7R,ORC1        |
| RNA binding                                      | 3 | EIF4G2,JAKMIP1,LIN28B     |
| carbohydrate metabolic process                   | 3 | HEXA,MGAM,SDR42E1         |
| cell division                                    | 3 | SPICE1,SPTBN1,TACC1       |
| cell motility                                    | 3 | DNHD1,NOD2,RELN           |
| cell-cell signaling                              | 3 | KCNJ5,RELN,SNCAIP         |
| chromosome organization                          | 3 | C11orf30,EP400,KDM3B      |
| enzyme binding                                   | 3 | JAKMIP1,NOD2,SNCAIP       |
| growth                                           | 3 | IL7R,NOD2,SIPA1           |
| microtubule organizing center                    | 3 | FRY,SPICE1,TACC1          |
| nucleobase-containing compound catabolic process | 3 | ENTPD3,LIN28B,SIPA1       |
| nucleolus                                        | 3 | ORC1,SNCAIP,SPTBN1        |
| transmembrane transporter activity               | 3 | FER1L6,KCNJ5,TRPC6        |
| ATPase activity                                  | 2 | ABCA13,FER1L6             |
| cilium                                           | 2 | HYDIN,ROM1                |
| cytoskeletal protein binding                     | 2 | JAKMIP1,SPTBN1            |
| hydrolase activity, acting on glycosyl bonds     | 2 | HEXA,MGAM                 |
| kinase activity                                  | 2 | RELN,STYK1                |
| lipid binding                                    | 2 | SNAP91,SPTBN1             |
| nucleoplasm                                      | 2 | EP400,ORC1                |
| peptidase activity                               | 2 | ADAMTS18,RELN             |
| proteinaceous extracellular matrix               | 2 | KAL1,RELN                 |
| structural molecule activity                     | 2 | KAL1,SPTBN1               |
| Golgi apparatus                                  | 1 | STX5                      |
| cellular amino acid metabolic process            | 1 | HGD                       |
| chromosome                                       | 1 | ORC1                      |
| chromosome segregation                           | 1 | SPICE1                    |
| cofactor metabolic process                       | 1 | ACACA                     |
| developmental maturation                         | 1 | RELN                      |
| generation of precursor metabolites and energy   | 1 | ACACA                     |
| helicase activity                                | 1 | EP400                     |
| ligase activity                                  | 1 | ACACA                     |
| lysosome                                         | 1 | GIMAP5                    |
| mitochondrion organization                       | 1 | GIMAP5                    |
| mitosis                                          | 1 | SPICE1                    |
| nuclear chromosome                               | 1 | ORC1                      |
| nucleocytoplasmic transport                      | 1 | SPTBN1                    |

|                                                      |   |        |
|------------------------------------------------------|---|--------|
| plasma membrane organization                         | 1 | SPTBN1 |
| protein targeting                                    | 1 | SPTBN1 |
| sulfur compound metabolic process                    | 1 | ACACA  |
| symbiosis, encompassing mutualism through parasitism | 1 | NOD2   |
| vacuole                                              | 1 | GIMAP5 |
